# Supplementary material for: cDNA Microarray Gene Expression Profiling of Hedgehog Signaling Pathway Inhibition in Human Colon Cancer Cells
Source: PLoS One. 2010 Oct 1;5(10):e13054. doi: 10.1371/journal.pone.0013054 (PMC2948497; doi:10.1371/journal.pone.0013054)
Supplement: Data S2 — GC3/c1 Raw Microarray Data. (11.06 MB XLS) [file pone.0013054.s002.xls]

## Sheet: Gant61-sample-probe-ave-norm-bg
Original microarray data for cell line GC3
PROBE_ID	SYMBOL	GC3-DMSO.AVG_Signal	GC3-DMSO.NARRAYS	GC3-DMSO.ARRAY_STDEV	GC3-DMSO.Detection Pval	DiffScore(DSMO/DSMO)	GC3-Gant61.AVG_Signal	GC3-Gant61.NARRAYS	GC3-Gant61.ARRAY_STDEV	GC3-Gant61.Detection Pval	DiffScore(Gant61/DSMO)	ratio(Gant61/DSMO)	SEARCH_KEY	ILMN_GENE	CHROMOSOME	DEFINITION	SYNONYMS	ACCESSION
ILMN_1343291	EEF1A1	31068.9	2	8868.17	0	0	32575.7	2	4818.66	0	0.000291313	1.0485	ILMN_137991	EEF1A1	6	Homo sapiens eukaryotic translation elongation factor 1 alpha 1 (EEF1A1), mRNA.	CCS-3; PTI1; eEF1A-1; MGC131894; EEF1A; FLJ25721; CCS3; MGC102687; MGC16224; EF-Tu; EEF-1; HNGC:16303; GRAF-1EF; LENG7; EF1A	NM_001402.5
ILMN_1651209	SLC35E2	11.6848	2	1.18381	0.0662651	0	15.479	2	9.15136	0.0481928	0.000291313	1.32471	ILMN_8692	SLC35E2	1	Homo sapiens solute carrier family 35, member E2 (SLC35E2), mRNA.	MGC117254; MGC138494; DKFZp686M0869; FLJ34996; FLJ44537; MGC126715; MGC104754; KIAA0447	NM_182838.1
ILMN_1651228	RPS28	13378.4	2	229.88	0	0	13672.2	2	2180.59	0	0.000291313	1.02196	ILMN_992	RPS28	19	Homo sapiens ribosomal protein S28 (RPS28), mRNA.		NM_001031.4
ILMN_1651229	IPO13	130.831	2	17.7385	0	0	176.144	2	7.77698	0	7.70535	1.34635	ILMN_10123	IPO13	1	Homo sapiens importin 13 (IPO13), mRNA.	RANBP13; KIAA0724; IMP13; KAP13	NM_014652.2
ILMN_1651235	AFAP1	1.95128	2	0.337204	0.243976	0	3.60456	2	5.22392	0.174699	0.000291313	1.84729	ILMN_5058	AFAP1	4	Homo sapiens actin filament associated protein 1 (AFAP1), transcript variant 2, mRNA.	AFAP-110; AFAP	NM_198595.2
ILMN_1651236	GGTLC1	11.3758	2	2.93126	0.0677711	0	8.79925	2	10.425	0.0993976	-0.000291313	0.773507	ILMN_24028	GGTLC1	20	Homo sapiens gamma-glutamyltransferase light chain 1 (GGTLC1), transcript variant C, mRNA.	dJ831C21.2; MGC50550	NM_080920.2
ILMN_1651237	CDT1	1084.1	2	193.009	0	0	392.742	2	3.8158	0	-47.238	0.362276	ILMN_18895	CDT1	16	Homo sapiens chromatin licensing and DNA replication factor 1 (CDT1), mRNA.	DUP; RIS2	NM_030928.2
ILMN_1651238	TRPV1	-6.62386	2	1.95998	0.820783	0	-10.216	2	1.30292	0.972892	-0.000291313	1.54231	ILMN_18299	TRPV1	17	Homo sapiens transient receptor potential cation channel, subfamily V, member 1 (TRPV1), transcript variant 4, mRNA.	VR1; DKFZp434K0220	NM_080705.3
ILMN_1651254	LPP	1009.01	2	38.3306	0	0	1826.01	2	69.5464	0	111.76	1.8097	ILMN_3289	LPP	3	Homo sapiens LIM domain containing preferred translocation partner in lipoma (LPP), mRNA.		NM_005578.2
ILMN_1651260	CCNE2	-0.143434	2	5.11578	0.332831	0	-5.09686	2	0.520927	0.707831	-0.000291313	35.5345	ILMN_17027	CCNE2	8	Homo sapiens cyclin E2 (CCNE2), mRNA.	CYCE2	NM_057749.1
ILMN_1651262	HNRNPAB	7435.65	2	1057.87	0	0	4543.49	2	281.577	0	-24.9556	0.611041	ILMN_757	HNRNPAB	5	Homo sapiens heterogeneous nuclear ribonucleoprotein A/B (HNRNPAB), transcript variant 2, mRNA.	ABBP1; FLJ40338	NM_004499.3
ILMN_1651268	LOH12CR1	44.5963	2	7.63089	0.0120482	0	41.226	2	4.13073	0.0165663	-0.000291313	0.924428	ILMN_5963	LOH12CR1	12	Homo sapiens loss of heterozygosity, 12, chromosomal region 1 (LOH12CR1), mRNA.	LOH1CR12	NM_058169.2
ILMN_1651278	SNIP1	500.337	2	35.8362	0	0	581.412	2	7.75192	0	3.40432	1.16204	ILMN_9410	SNIP1	1	Homo sapiens Smad nuclear interacting protein 1 (SNIP1), mRNA.	RP3-423B22.3; dJ423B22.2; FLJ12553	NM_024700.2
ILMN_1651282	COL17A1	85.9352	2	14.9343	0.00451807	0	129.798	2	18.5693	0.00150602	6.17362	1.51042	ILMN_5067	COL17A1	10	Homo sapiens collagen, type XVII, alpha 1 (COL17A1), mRNA.	KIAA0204; BA16H23.2; BPAG2; BP180; LAD-1	NM_000494.3
ILMN_1651285	BCL6B	24.126	2	2.6537	0.0256024	0	23.0024	2	8.68533	0.0286145	-0.000291313	0.953427	ILMN_23358	BCL6B	17	Homo sapiens B-cell CLL/lymphoma 6, member B (zinc finger protein) (BCL6B), mRNA.	ZBTB28; ZNF62; BAZF	NM_181844.2
ILMN_1651286	GRHL1	6.12332	2	3.20184	0.135542	0	8.00739	2	5.46362	0.108434	0.000291313	1.30769	ILMN_27448	GRHL1	2	Homo sapiens grainyhead-like 1 (Drosophila) (GRHL1), transcript variant 1, mRNA.	TFCP2L2; LBP32; LBP-32; MGR	NM_014552.2
ILMN_1651292	LOC644613	0.0166313	2	3.75906	0.335843	0	-3.72331	2	0.418223	0.588855	-0.000291313	-223.873	ILMN_42692	LOC644613	11	PREDICTED: Homo sapiens hypothetical protein LOC644613 (LOC644613), mRNA.		XM_927728.1
ILMN_1651303	ATP13A4	1.84486	2	3.67894	0.243976	0	7.80008	2	6.55539	0.111446	0.000291313	4.22801	ILMN_10412	ATP13A4	3	Homo sapiens ATPase type 13A4 (ATP13A4), mRNA.	DKFZp761I1011; MGC126545	NM_032279.2
ILMN_1651309	DIAPH2	-1.6121	2	0.928147	0.432229	0	-4.3889	2	4.18354	0.662651	-0.000291313	2.72247	ILMN_32433	DIAPH2	X	Homo sapiens diaphanous homolog 2 (Drosophila) (DIAPH2), transcript variant 156, mRNA.	POF2; FLJ11167; POF; DIA; DIA2	NM_006729.3
ILMN_1651315	HMG20B	1481.31	2	278.157	0	0	1617.35	2	112.336	0	0.000291313	1.09184	ILMN_137076	HMG20B	19	Homo sapiens high-mobility group 20B (HMG20B), mRNA.	SMARCE1r; FLJ26127; HMGX2; pp8857; PP7706; BRAF35; SOXL; BRAF25	NM_006339.1
ILMN_1651330	KCNG4	-4.86783	2	1.42552	0.695783	0	-5.67474	2	3.79532	0.746988	-0.000291313	1.16577	ILMN_3179	KCNG4	16	Homo sapiens potassium voltage-gated channel, subfamily G, member 4 (KCNG4), transcript variant 2, mRNA.	MGC4558; MGC129609; KV6.4; KV6.3	NM_133490.2
ILMN_1651336	MLYCD	130.669	2	6.31562	0	0	136.304	2	3.66757	0.00150602	0.000291313	1.04312	ILMN_2280	MLYCD	16	Homo sapiens malonyl-CoA decarboxylase (MLYCD), nuclear gene encoding mitochondrial protein, mRNA.	MCD; MGC59795	NM_012213.2
ILMN_1651343	ITGA11	-5.17768	2	3.13626	0.715361	0	-2.97682	2	0.578887	0.506024	0.000291313	0.574933	ILMN_6740	ITGA11	15	Homo sapiens integrin, alpha 11 (ITGA11), mRNA.	HsT18964	NM_001004439.1
ILMN_1651346	TICAM2	77.1792	2	7.8363	0.00451807	0	95.0534	2	1.42056	0.00451807	0.467772	1.23159	ILMN_24482	TICAM2	5	Homo sapiens toll-like receptor adaptor molecule 2 (TICAM2), mRNA.	MGC129877; MGC129876; TIRP; TICAM-2; TIRAP3; TRAM	NM_021649.3
ILMN_1651347	SERTAD2	2126.26	2	56.0284	0	0	2545.11	2	47.9851	0	7.06238	1.19699	ILMN_4347	SERTAD2	2	Homo sapiens SERTA domain containing 2 (SERTAD2), mRNA.	Sei-2; TRIP-Br2; MGC126688; MGC126690	NM_014755.1
ILMN_1651354	SPP1	2.11403	2	3.49821	0.24247	0	16.3988	2	10.9928	0.0421687	0.000291313	7.75716	ILMN_9394	SPP1	4	Homo sapiens secreted phosphoprotein 1 (SPP1), transcript variant 2, mRNA.	BNSP; MGC110940; BSPI; OPN; ETA-1	NM_000582.2
ILMN_1651358	HBE1	3.62117	2	4.69803	0.192771	0	2.22098	2	1.00553	0.21988	-0.000291313	0.613332	ILMN_27655	HBE1	11	Homo sapiens hemoglobin, epsilon 1 (HBE1), mRNA.	HBE	NM_005330.3
ILMN_1651364	PCBD2	135.307	2	4.26156	0	0	202.95	2	11.5743	0	20.0303	1.49992	ILMN_1619	PCBD2	5	Homo sapiens pterin-4 alpha-carbinolamine dehydratase/dimerization cofactor of hepatocyte nuclear factor 1 alpha (TCF1) 2 (PCBD2), mRNA.	DCOH2; DCOHM	NM_032151.3
ILMN_1651365	ZBED2	-6.50174	2	1.39833	0.811747	0	-5.86144	2	0.0795387	0.763554	0.000291313	0.901518	ILMN_4927	ZBED2	3	Homo sapiens zinc finger, BED-type containing 2 (ZBED2), mRNA.	MGC10796	NM_024508.3
ILMN_1651370	USP21	5.47457	2	9.44876	0.14759	0	11.8175	2	0.881494	0.0677711	0.000291313	2.15861	ILMN_18137	USP21	1	Homo sapiens ubiquitin specific peptidase 21 (USP21), transcript variant 3, mRNA.	MGC3394; USP16; USP23	NM_001014443.2
ILMN_1651373	RHD	-2.8014	2	1.90574	0.521084	0	-3.67877	2	3.49729	0.585843	-0.000291313	1.31319	ILMN_5887	RHD	1	Homo sapiens Rh blood group, D antigen (RHD), mRNA.	RhK562-II; RhII; Rh4; RHDel; RH30; RhDCw; RHCED; RH; RHXIII; DIIIc; RHDVA(TT); RHPII; RhPI; CD240D	NM_016124.3
ILMN_1651378	AUP1	717.772	2	115.064	0	0	535.692	2	27.5762	0	-6.55498	0.746326	ILMN_11991	AUP1	2	Homo sapiens ancient ubiquitous protein 1 (AUP1), mRNA.		NM_181575.3
ILMN_1651385	MFN2	448.099	2	27.5549	0	0	528.775	2	14.6297	0	4.40179	1.18004	ILMN_11962	MFN2	1	Homo sapiens mitofusin 2 (MFN2), nuclear gene encoding mitochondrial protein, mRNA.	HSG; CMT2A; KIAA0214; CMT2A2; MARF; CPRP1	NM_014874.2
ILMN_1651405	BRD9	979.992	2	27.2633	0	0	980.05	2	8.87132	0	0.000291313	1.00006	ILMN_12952	BRD9	5	Homo sapiens bromodomain containing 9 (BRD9), transcript variant 1, mRNA.	LAVS3040; DKFZp686L0539; PRO9856; DKFZp434D0711	NM_023924.3
ILMN_1651415	DERL3	35.0866	2	2.58103	0.0165663	0	27.2595	2	6.20095	0.0271084	-0.000291313	0.77692	ILMN_25837	DERL3	22	Homo sapiens Der1-like domain family, member 3 (DERL3), transcript variant 1, mRNA.	C22orf14; MGC71803; IZP6	NM_198440.2
ILMN_1651428	SYTL2	8.08353	2	5.27932	0.108434	0	3.64337	2	2.67516	0.174699	-0.000291313	0.450715	ILMN_23970	SYTL2	11	Homo sapiens synaptotagmin-like 2 (SYTL2), transcript variant b, mRNA.	MGC102768; CHR11SYT; SGA72M; KIAA1597; SLP2	NM_032379.3
ILMN_1651429	SELM	526.931	2	167.036	0	0	437.467	2	5.31118	0	-0.000291313	0.830217	ILMN_1005	SELM	22	Homo sapiens selenoprotein M (SELM), mRNA.	MGC40146; SEPM	NM_080430.2
ILMN_1651430	CTRB2	-0.117695	2	9.03668	0.328313	0	-3.01754	2	3.608	0.509036	-0.000291313	25.6387	ILMN_3447	CTRB2	16	Homo sapiens chymotrypsinogen B2 (CTRB2), mRNA.		NM_001025200.3
ILMN_1651437	FOXI1	3.84297	2	4.02737	0.185241	0	7.04092	2	2.64923	0.121988	0.000291313	1.83216	ILMN_6593	FOXI1	5	Homo sapiens forkhead box I1 (FOXI1), transcript variant 1, mRNA.	HFH3; FKHL10; MGC34197; FREAC6	NM_012188.4
ILMN_1651438	ZFPM1	127.456	2	13.3101	0	0	85.4161	2	5.7403	0.0060241	-8.74823	0.670163	ILMN_15190	ZFPM1	16	Homo sapiens zinc finger protein, multitype 1 (ZFPM1), mRNA.	FOG; FOG1; ZNF408; ZNF89A	NM_153813.2
ILMN_1651456	UTY	-4.49553	2	2.54108	0.656627	0	-8.48732	2	5.6613	0.923193	-0.000291313	1.88795	ILMN_14796	UTY	Y	Homo sapiens ubiquitously transcribed tetratricopeptide repeat gene, Y-linked (UTY), transcript variant 1, mRNA.	UTY1; DKFZp686L12190	NM_182660.1
ILMN_1651457	GPR32	3.24059	2	6.73936	0.210843	0	-1.75657	2	0.675506	0.423193	-0.000291313	-0.542053	ILMN_8518	GPR32	19	Homo sapiens G protein-coupled receptor 32 (GPR32), mRNA.		NM_001506.1
ILMN_1651464	FBXL10	10.4056	2	0.801279	0.0737952	0	9.44803	2	1.67869	0.0903614	-0.000291313	0.907979	ILMN_27878	FBXL10	12	Homo sapiens F-box and leucine-rich repeat protein 10 (FBXL10), transcript variant 2, mRNA.	CXXC2; Fbl10; JHDM1B; PCCX2; KDM2B	NM_001005366.1
ILMN_1651490	CYP26A1	30.0511	2	0.202787	0.0195783	0	19.7481	2	3.0894	0.0316265	-0.000291313	0.65715	ILMN_23980	CYP26A1	10	Homo sapiens cytochrome P450, family 26, subfamily A, polypeptide 1 (CYP26A1), transcript variant 1, mRNA.	CP26; P450RAI1; CYP26; P450RAI	NM_000783.2
ILMN_1651492	WNT2B	51.3339	2	0.183616	0.0105422	0	52.8098	2	6.95699	0.0120482	0.000291313	1.02875	ILMN_18414	WNT2B	1	Homo sapiens wingless-type MMTV integration site family, member 2B (WNT2B), transcript variant WNT-2B2, mRNA.	WNT13; XWNT2	NM_024494.1
ILMN_1651496	HIST1H2BD	223.264	2	19.7014	0	0	149.084	2	8.77676	0.00150602	-17.022	0.667751	ILMN_17622	HIST1H2BD	6	Homo sapiens histone cluster 1, H2bd (HIST1H2BD), transcript variant 2, mRNA.	H2B.1B; HIRIP2; MGC90432; dJ221C16.6; H2B/b; H2BFB	NM_138720.1
ILMN_1651498	GADD45G	58.2143	2	1.69553	0.00903614	0	175.243	2	23.6973	0	54.6389	3.01031	ILMN_4884	GADD45G	9	Homo sapiens growth arrest and DNA-damage-inducible, gamma (GADD45G), mRNA.	DDIT2; CR6; GADD45gamma; GRP17	NM_006705.2
ILMN_1651499	ERGIC1	26.3234	2	5.14278	0.0225904	0	16.6604	2	4.28072	0.0421687	-0.000291313	0.632915	ILMN_19380	ERGIC1	5	Homo sapiens endoplasmic reticulum-golgi intermediate compartment (ERGIC) 1 (ERGIC1), transcript variant 2, mRNA.	ERGIC32; MGC14345; KIAA1181; ERGIC-32	NM_020462.1
ILMN_1651501	ABCD4	9.97734	2	3.74898	0.0783133	0	11.9962	2	3.02861	0.0662651	0.000291313	1.20235	ILMN_2251	ABCD4	14	Homo sapiens ATP-binding cassette, sub-family D (ALD), member 4 (ABCD4), transcript variant 2, mRNA.	P79R; PMP69; P70R; ABC41; EST352188; PXMP1L	NM_020323.1
ILMN_1651504	C4orf8	243.962	2	17.3433	0	0	264.507	2	7.81334	0	0.000291313	1.08421	ILMN_22362	C4ORF8	4	Homo sapiens chromosome 4 open reading frame 8 (C4orf8), mRNA.	RES4-22	NM_003704.3
ILMN_1651506	NCOA6IP	213.326	2	10.7335	0	0	195.37	2	14.2846	0	-0.000291313	0.915828	ILMN_8359	NCOA6IP	8	Homo sapiens nuclear receptor coactivator 6 interacting protein (NCOA6IP), mRNA.	PIMT; FLJ22995; PIPMT	NM_024831.5
ILMN_1651513	SKIV2L2	1141.3	2	16.2588	0	0	1106.52	2	122.952	0	-0.000291313	0.969522	ILMN_8825	SKIV2L2	5	Homo sapiens superkiller viralicidic activity 2-like 2 (S. cerevisiae) (SKIV2L2), mRNA.	MGC142069; Dob1; KIAA0052; Mtr4	NM_015360.3
ILMN_1651536	GEFT	0.484602	2	1.2841	0.301205	0	-1.60123	2	3.0821	0.406627	-0.000291313	-3.30421	ILMN_16431	GEFT		Homo sapiens RhoA/RAC/CDC42 exchange factor (GEFT), transcript variant 2, mRNA.	p63RhoGEF	NM_133483.2
ILMN_1651538	NUMBL	27.6005	2	1.2393	0.0210843	0	37.0398	2	1.55541	0.0195783	0.000291313	1.342	ILMN_138654	NUMBL	19	Homo sapiens numb homolog (Drosophila)-like (NUMBL), mRNA.	NUMB-R; TNRC23; CTG3a; CAG3A; NUMBR; NBL	NM_004756.3
ILMN_1651544	HDAC8	87.5108	2	5.88416	0.00451807	0	105.612	2	5.00193	0.00301205	0.372016	1.20685	ILMN_2001	HDAC8	X	Homo sapiens histone deacetylase 8 (HDAC8), mRNA.	HDACL1; RPD3	NM_018486.1
ILMN_1651557	KDELC2	1071.14	2	5.04447	0	0	1196	2	63.5914	0	1.22889	1.11656	ILMN_23677	KDELC2	11	Homo sapiens KDEL (Lys-Asp-Glu-Leu) containing 2 (KDELC2), mRNA.	MGC33424	NM_153705.4
ILMN_1651567	WHSC1	9.85691	2	0.293559	0.0798193	0	10.1406	2	0.328102	0.0813253	0.000291313	1.02878	ILMN_10371	WHSC1	4	Homo sapiens Wolf-Hirschhorn syndrome candidate 1 (WHSC1), transcript variant 9, mRNA.	TRX5; REIIBP; NSD2; KIAA1090; MMSET	NM_133336.1
ILMN_1651568	MUC13	277.031	2	42.2709	0	0	718.73	2	8.6857	0	350.901	2.5944	ILMN_26607	MUC13	3	Homo sapiens mucin 13, cell surface associated (MUC13), mRNA.	DRCC1; FLJ20063	NM_033049.2
ILMN_1651574	AQP3	11.4899	2	5.65609	0.0662651	0	5.60747	2	2.37039	0.143072	-0.000291313	0.488033	ILMN_22744	AQP3	9	Homo sapiens aquaporin 3 (Gill blood group) (AQP3), mRNA.	GIL	NM_004925.3
ILMN_1651597	FBXO44	-5.76684	2	1.86585	0.77259	0	-9.52186	2	0.995289	0.948795	-0.000291313	1.65114	ILMN_23703	FBXO44	1	Homo sapiens F-box protein 44 (FBXO44), transcript variant 4, mRNA.	Fbx44; FBG3; DKFZp781J0852; FBX30; Fbxo6a; MGC14140	NM_001014765.1
ILMN_1651599	ENTPD2	7.75582	2	1.64958	0.111446	0	2.32022	2	0.501673	0.215361	-0.000291313	0.299159	ILMN_21052	ENTPD2	9	Homo sapiens ectonucleoside triphosphate diphosphohydrolase 2 (ENTPD2), transcript variant 1, mRNA.	NTPDase-2; CD39L1	NM_203468.1
ILMN_1651604	MARK4	8.8613	2	8.23054	0.10241	0	5.91812	2	0.0276874	0.14006	-0.000291313	0.667861	ILMN_10515	MARK4	19	Homo sapiens MAP/microtubule affinity-regulating kinase 4 (MARK4), mRNA.	Nbla00650; FLJ90097; KIAA1860; MARKL1	NM_031417.2
ILMN_1651609	SPRED3	9.46397	2	1.54625	0.0888554	0	13.5294	2	6.7502	0.0527108	0.000291313	1.42956	ILMN_137736	SPRED3	19	Homo sapiens sprouty-related, EVH1 domain containing 3 (SPRED3), transcript variant 1, mRNA.	Eve-3	NM_001042522.1
ILMN_1651617	CTNNB1	63.3092	2	2.33694	0.00903614	0	55.4321	2	0.0174899	0.0105422	-0.000291313	0.875577	ILMN_21386	CTNNB1	3	Homo sapiens catenin (cadherin-associated protein), beta 1, 88kDa (CTNNB1), mRNA.	CTNNB; FLJ25606; FLJ37923; DKFZp686D02253	NM_001098209.1
ILMN_1651624	C6orf201	-2.76429	2	3.95511	0.527108	0	2.65041	2	0.207123	0.206325	0.000291313	-0.958802	ILMN_30085	C6ORF201	6	Homo sapiens chromosome 6 open reading frame 201 (C6orf201), mRNA.	MGC87625; dJ1013A10.5	NM_001085401.1
ILMN_1651628	EXOC6	470.666	2	4.50355	0	0	576.501	2	42.8261	0	6.77885	1.22486	ILMN_2414	EXOC6	10	Homo sapiens exocyst complex component 6 (EXOC6), transcript variant 1, mRNA.	SEC15L1; SEC15L3; EXOC6A; Sec15p; DKFZp761I2124; FLJ1125; FLJ11251; SEC15L; MGC33397	NM_019053.3
ILMN_1651642	GPC2	53.7501	2	9.33873	0.0105422	0	54.7867	2	1.10089	0.0105422	0.000291313	1.01928	ILMN_6771	GPC2	7	Homo sapiens glypican 2 (GPC2), mRNA.	FLJ38962; DKFZp547M109	NM_152742.1
ILMN_1651643	ASB11	4.94126	2	0.20657	0.158133	0	7.12277	2	2.15916	0.121988	0.000291313	1.44149	ILMN_21119	ASB11	X	Homo sapiens ankyrin repeat and SOCS box-containing 11 (ASB11), transcript variant 2, mRNA.	MGC119169; DKFZp779E2460; MGC119168	NM_001012428.1
ILMN_1651652	RTN3	15.5527	2	1.66173	0.0466867	0	22.6442	2	8.02099	0.0286145	0.000291313	1.45597	ILMN_20904	RTN3	11	Homo sapiens reticulon 3 (RTN3), transcript variant 2, mRNA.	NSPLII; NSPL2; ASYIP; HAP; RTN3-A1	NM_201428.1
ILMN_1651656	PSG7	-1.74226	2	0.729342	0.442771	0	6.21795	2	6.13077	0.135542	0.000291313	-3.56891	ILMN_28896	PSG7	19	Homo sapiens pregnancy specific beta-1-glycoprotein 7 (PSG7), mRNA.		NM_002783.1
ILMN_1651657	ADAM33	12.401	2	1.90637	0.060241	0	13.1805	2	1.26409	0.0557229	0.000291313	1.06285	ILMN_22414	ADAM33	20	Homo sapiens ADAM metallopeptidase domain 33 (ADAM33), transcript variant 1, mRNA.	DKFZp434K0521; FLJ36751; MGC149823; DJ964F7.1; MGC71889; FLJ35308	NM_025220.2
ILMN_1651681	WDFY3	-7.21028	2	0.305816	0.871988	0	-5.38006	2	4.65054	0.722892	0.000291313	0.746165	ILMN_3704	WDFY3	4	Homo sapiens WD repeat and FYVE domain containing 3 (WDFY3), transcript variant 3, mRNA.	ALFY; KIAA0993; ZFYVE25; MGC16461	NM_178585.1
ILMN_1651684	KIAA0586	324.771	2	39.7453	0	0	330.266	2	10.4846	0	0.000291313	1.01692	ILMN_3921	KIAA0586	14	Homo sapiens KIAA0586 (KIAA0586), mRNA.	Talpid3	NM_014749.2
ILMN_1651685	C8ORFK32	4.57616	2	6.55499	0.174699	0	5.79455	2	3.57914	0.141566	0.000291313	1.26625	ILMN_7805	C8ORFK32	8	Homo sapiens C8orfK32 protein (C8ORFK32), mRNA.	MGC126010; MGC33221; MGC126009	NM_015912.2
ILMN_1651692	STK10	62.6661	2	14.959	0.00903614	0	94.4489	2	2.8892	0.00451807	4.23776	1.50718	ILMN_25659	STK10	5	Homo sapiens serine/threonine kinase 10 (STK10), mRNA.	PRO2729; LOK	NM_005990.3
ILMN_1651693	GSG1	4.71863	2	6.08139	0.167169	0	5.95557	2	0.15046	0.138554	0.000291313	1.26214	ILMN_2782	GSG1	12	Homo sapiens germ cell associated 1 (GSG1), transcript variant 3, mRNA.	MGC111023; MGC3146	NM_001080554.1
ILMN_1651708	RESP18	-4.10774	2	3.26472	0.628012	0	-2.09943	2	1.72347	0.439759	0.000291313	0.511091	ILMN_27080	RESP18		Homo sapiens regulated endocrine-specific protein 18 (RESP18), mRNA.		NM_001007089.2
ILMN_1651710	IQCD	1.04297	2	1.36033	0.278614	0	3.11026	2	0.0989875	0.191265	0.000291313	2.98212	ILMN_13421	IQCD	12	Homo sapiens IQ motif containing D (IQCD), mRNA.	4933433C09Rik	NM_138451.1
ILMN_1651715	RNF2	11.3285	2	6.12809	0.0677711	0	11.1721	2	3.09008	0.0737952	-0.000291313	0.986196	ILMN_7319	RNF2	1	Homo sapiens ring finger protein 2 (RNF2), mRNA.	HIPI3; DING; BAP1; BAP-1; RING2; RING1B	NM_007212.3
ILMN_1651717	ADAMTS20	-5.16418	2	1.41667	0.71988	0	-3.97602	2	2.92783	0.620482	0.000291313	0.769924	ILMN_4957	ADAMTS20	12	Homo sapiens ADAM metallopeptidase with thrombospondin type 1 motif, 20 (ADAMTS20), mRNA.	GON-1	NM_025003.3
ILMN_1651719	MBTPS1	1363.23	2	78.2661	0	0	1456.28	2	13.2753	0	0.000291313	1.06826	ILMN_5443	MBTPS1	16	Homo sapiens membrane-bound transcription factor peptidase, site 1 (MBTPS1), mRNA.	MGC138712; KIAA0091; SKI-1; S1P; MGC138711; PCSK8	NM_003791.2
ILMN_1651735	TGOLN2	1042.66	2	244.187	0	0	992.625	2	19.1776	0	-0.000291313	0.952016	ILMN_10057	TGOLN2	2	Homo sapiens trans-golgi network protein 2 (TGOLN2), mRNA.	TGN51; MGC14722; TGN48; TGN38; TGN46; TTGN2	NM_006464.2
ILMN_1651741	ARMCX3	2.18009	2	4.89511	0.237952	0	3.77526	2	7.6579	0.170181	0.000291313	1.7317	ILMN_15637	ARMCX3	X	Homo sapiens armadillo repeat containing, X-linked 3 (ARMCX3), transcript variant 3, mRNA.	ALEX3; KIAA0443; dJ545K15.2; DKFZp781N1954; MGC12199	NM_177948.2
ILMN_1651745	TMEM25	36.8824	2	4.73512	0.0150602	0	43.6042	2	10.5098	0.0165663	0.000291313	1.18225	ILMN_1263	TMEM25	11	Homo sapiens transmembrane protein 25 (TMEM25), mRNA.	FLJ14399	NM_032780.2
ILMN_1651763	TFDP3	-0.403114	2	1.29751	0.349398	0	-5.50228	2	3.0665	0.731928	-0.000291313	13.6494	ILMN_22989	TFDP3	X	Homo sapiens transcription factor Dp family, member 3 (TFDP3), mRNA.	E2F-like; MGC161639; HCA661; CT30	NM_016521.2
ILMN_1651767	MKL1	98.77	2	25.149	0.00301205	0	98.189	2	2.15425	0.00301205	-0.000291313	0.994118	ILMN_25866	MKL1	22	Homo sapiens megakaryoblastic leukemia (translocation) 1 (MKL1), mRNA.	MAL; BSAC; MRTF-A	NM_020831.3
ILMN_1651771	RRAGB	-7.96819	2	4.59556	0.918675	0	-4.2404	2	0.244863	0.646084	0.000291313	0.532166	ILMN_28350	RRAGB	X	Homo sapiens Ras-related GTP binding B (RRAGB), transcript variant RAGBl, mRNA.	RAGB; bA465E19.1	NM_016656.2
ILMN_1651776	FHOD1	66.2167	2	8.37295	0.0060241	0	50.7241	2	4.55795	0.0150602	-0.117377	0.766031	ILMN_14837	FHOD1	16	Homo sapiens formin homology 2 domain containing 1 (FHOD1), mRNA.	FHOS	NM_013241.2
ILMN_1651787	MSH5	28.5791	2	5.06701	0.0195783	0	25.5535	2	7.36268	0.0271084	-0.000291313	0.894132	ILMN_137732	MSH5	6	Homo sapiens mutS homolog 5 (E. coli) (MSH5), transcript variant 3, mRNA.	DKFZp434C1615; MGC2939; G7; MutSH5; NG23	NM_002441.3
ILMN_1651788	MAP3K11	277.716	2	7.0492	0	0	255.804	2	25.4765	0	-0.000291313	0.921099	ILMN_23190	MAP3K11	11	Homo sapiens mitogen-activated protein kinase kinase kinase 11 (MAP3K11), mRNA.	SPRK; MLK-3; MGC17114; MLK3; PTK1	NM_002419.3
ILMN_1651792	RORC	-7.47554	2	7.2486	0.89759	0	-7.74064	2	1.55056	0.89006	-0.000291313	1.03546	ILMN_27135	RORC	1	Homo sapiens RAR-related orphan receptor C (RORC), transcript variant 1, mRNA.	MGC129539; RZRG; NR1F3; RORG; TOR	NM_005060.3
ILMN_1651799	SLC38A2	2174.93	2	311.078	0	0	2712.77	2	42.8055	0	6.95325	1.24729	ILMN_10001	SLC38A2	12	Homo sapiens solute carrier family 38, member 2 (SLC38A2), mRNA.	PRO1068; SAT2; SNAT2; KIAA1382; ATA2	NM_018976.3
ILMN_1651800	GSTM4	103.827	2	3.94124	0.00301205	0	125.648	2	6.42861	0.00150602	1.08016	1.21017	ILMN_4003	GSTM4	1	Homo sapiens glutathione S-transferase M4 (GSTM4), transcript variant 2, mRNA.	GSTM4-4; MGC131945; GTM4; MGC9247	NM_147148.1
ILMN_1651817	GRIK1	-4.42046	2	3.44143	0.64006	0	-1.70696	2	0.266865	0.418675	0.000291313	0.38615	ILMN_16468	GRIK1	21	Homo sapiens glutamate receptor, ionotropic, kainate 1 (GRIK1), transcript variant 1, mRNA.	GLUR5; EEA3; GLR5; EAA3	NM_000830.3
ILMN_1651819	GALNT11	488.209	2	16.6491	0	0	601.134	2	73.3702	0	3.63239	1.2313	ILMN_5237	GALNT11	7	Homo sapiens UDP-N-acetyl-alpha-D-galactosamine:polypeptide N-acetylgalactosaminyltransferase 11 (GalNAc-T11) (GALNT11), mRNA.	FLJ21634; MGC71630	NM_022087.2
ILMN_1651826	BASP1	1.71439	2	1.48283	0.25	0	-3.09616	2	1.00697	0.519578	-0.000291313	-1.80598	ILMN_28962	BASP1	5	Homo sapiens brain abundant, membrane attached signal protein 1 (BASP1), mRNA.	CAP-23; NAP22; CAP23; MGC8555; NAP-22	NM_006317.3
ILMN_1651828	CCT3	1544.49	2	97.1828	0	0	1469.37	2	22.7676	0	-0.000291313	0.951363	ILMN_24878	CCT3	1	Homo sapiens chaperonin containing TCP1, subunit 3 (gamma) (CCT3), transcript variant 3, mRNA.	CCTG; TRIC5; TCP-1-gamma; PIG48; CCT-gamma	NM_001008800.1
ILMN_1651832	EHD1	1480.84	2	79.9108	0	0	1608.74	2	9.17067	0	0.000291313	1.08637	ILMN_17263	EHD1	11	Homo sapiens EH-domain containing 1 (EHD1), mRNA.	PAST1; PAST; HPAST1; FLJ42622; FLJ44618; H-PAST	NM_006795.2
ILMN_1651838	RND1	53.2998	2	14.0711	0.0105422	0	77.8073	2	7.85328	0.0060241	1.9481	1.4598	ILMN_18161	RND1	12	Homo sapiens Rho family GTPase 1 (RND1), mRNA.	RHO6; ARHS; RHOS; FLJ42294	NM_014470.2
ILMN_1651848	ITSN1	-2.97743	2	4.67772	0.53012	0	2.64573	2	4.37388	0.206325	0.000291313	-0.888594	ILMN_10540	ITSN1	21	Homo sapiens intersectin 1 (SH3 domain protein) (ITSN1), transcript variant 1, mRNA.	MGC134948; SH3D1A; SH3P17; MGC134949; ITSN	NM_003024.2
ILMN_1651850	RPS16	26885.6	2	4982.19	0	0	29180.4	2	5246.83	0	0.000291313	1.08535	ILMN_3511	RPS16	19	Homo sapiens ribosomal protein S16 (RPS16), mRNA.		NM_001020.4
ILMN_1651872	UBIAD1	308.437	2	28.2551	0	0	278.39	2	5.37164	0	-0.000291313	0.902583	ILMN_29292	UBIAD1	1	Homo sapiens UbiA prenyltransferase domain containing 1 (UBIAD1), mRNA.	RP4-796F18.1; TERE1	NM_013319.1
ILMN_1651878	EVC	19.2066	2	10.5082	0.0331325	0	17.2126	2	2.1509	0.0406627	-0.000291313	0.896182	ILMN_3582	EVC	4	Homo sapiens Ellis van Creveld syndrome (EVC), mRNA.	EVCL; MGC105107; DWF-1	NM_153717.2
ILMN_1651886	CWF19L1	1669.97	2	241.121	0	0	1276.61	2	24.2642	0	-7.11919	0.764452	ILMN_23789	CWF19L1	10	Homo sapiens CWF19-like 1, cell cycle control (S. pombe) (CWF19L1), mRNA.	FLJ10998; RP11-316M21.3	NM_018294.3
ILMN_1651900	KCNA4	-10.2951	2	2.34036	0.986446	0	-5.03229	2	3.11342	0.700301	0.000291313	0.488806	ILMN_20901	KCNA4	11	Homo sapiens potassium voltage-gated channel, shaker-related subfamily, member 4 (KCNA4), mRNA.	HPCN2; HBK4; HUKII; KCNA4L; KV1.4; PCN2; KCNA8; HK1	NM_002233.2
ILMN_1651902	RASL11A	246.963	2	23.6111	0	0	123.856	2	26.4727	0.00150602	-30.4112	0.501516	ILMN_17784	RASL11A	13	Homo sapiens RAS-like, family 11, member A (RASL11A), mRNA.		NM_206827.1
ILMN_1651905	ZNF187	-1.88718	2	1.31759	0.459337	0	2.48261	2	2.6476	0.210843	0.000291313	-1.31551	ILMN_22578	ZNF187	6	Homo sapiens zinc finger protein 187 (ZNF187), transcript variant 1, mRNA.	ZSCAN26; MGC2815; SRE-ZBP	NM_007151.1
ILMN_1651936	SETD8	540.073	2	69.4156	0	0	632.255	2	16.2471	0	2.8661	1.17068	ILMN_21859	SETD8	12	Homo sapiens SET domain containing (lysine methyltransferase) 8 (SETD8), mRNA.	SET8; SET07; PR-Set7; KMT5A	NM_020382.3
ILMN_1651940	OR6C76	-1.04324	2	5.59731	0.393072	0	-1.13936	2	2.55784	0.379518	-0.000291313	1.09213	ILMN_22263	OR6C76	12	Homo sapiens olfactory receptor, family 6, subfamily C, member 76 (OR6C76), mRNA.		NM_001005183.1
ILMN_1651943	ANK3	7.97523	2	5.1249	0.111446	0	10.4277	2	3.97749	0.0813253	0.000291313	1.30752	ILMN_21858	ANK3	10	Homo sapiens ankyrin 3, node of Ranvier (ankyrin G) (ANK3), transcript variant 1, mRNA.	ANKYRIN-G; FLJ45464	NM_020987.2
ILMN_1651949	SCYL3	44.9727	2	10.9082	0.0120482	0	62.8544	2	6.9472	0.00903614	0.499298	1.39761	ILMN_8041	SCYL3	1	Homo sapiens SCY1-like 3 (S. cerevisiae) (SCYL3), transcript variant 1, mRNA.	PACE1; RP1-97P20.2; PACE-1	NM_020423.4
ILMN_1651950	TPST1	252.142	2	10.9044	0	0	299.786	2	19.8877	0	3.57348	1.18896	ILMN_2477	TPST1	7	Homo sapiens tyrosylprotein sulfotransferase 1 (TPST1), mRNA.		NM_003596.2
ILMN_1651964	ABCC5	258.879	2	8.13587	0	0	324.464	2	34.5966	0	4.80704	1.25334	ILMN_438	ABCC5	3	Homo sapiens ATP-binding cassette, sub-family C (CFTR/MRP), member 5 (ABCC5), transcript variant 2, mRNA.	MOAT-C; pABC11; ABC33; MRP5; SMRP; EST277145; DKFZp686C1782; MOATC	NM_001023587.1
ILMN_1651966	FGFR3	20.6145	2	4.04687	0.0301205	0	17.036	2	3.1088	0.0406627	-0.000291313	0.826409	ILMN_22960	FGFR3	4	Homo sapiens fibroblast growth factor receptor 3 (achondroplasia, thanatophoric dwarfism) (FGFR3), transcript variant 1, mRNA.	HSFGFR3EX; JTK4; CD333; ACH; CEK2	NM_000142.2
ILMN_1651967	TP53I3	18.0644	2	2.26649	0.0361446	0	36.478	2	0.894135	0.0195783	1.58763	2.01933	ILMN_21366	TP53I3	2	Homo sapiens tumor protein p53 inducible protein 3 (TP53I3), transcript variant 1, mRNA.	PIG3	NM_004881.2
ILMN_1651987	C6orf129	930.899	2	197.26	0	0	947.158	2	31.8807	0	0.000291313	1.01747	ILMN_24513	C6ORF129	6	Homo sapiens chromosome 6 open reading frame 129 (C6orf129), mRNA.	HSPC265; MGC131656	NM_138493.2
ILMN_1652006	SMC1A	11.7744	2	6.82605	0.0662651	0	2.92892	2	5.23007	0.201807	-0.000291313	0.248754	ILMN_19149	SMC1A	X	Homo sapiens structural maintenance of chromosomes 1A (SMC1A), mRNA.	SMCB; KIAA0178; SMC1alpha; DXS423E; DKFZp686L19178; SMC1; SMC1L1; SB1.8; MGC138332; CDLS2	NM_006306.2
ILMN_1652017	PPEF1	3.4604	2	10.5666	0.194277	0	12.3149	2	0.186775	0.064759	0.000291313	3.55881	ILMN_10993	PPEF1	X	Homo sapiens protein phosphatase, EF-hand calcium binding domain 1 (PPEF1), transcript variant 1b, mRNA.	PPP7C; PP7; PPEF	NM_152224.1
ILMN_1652022	DHX57	-1.69918	2	1.22365	0.442771	0	-6.33107	2	3.47593	0.799699	-0.000291313	3.72595	ILMN_26200	DHX57	2	Homo sapiens DEAH (Asp-Glu-Ala-Asp/His) box polypeptide 57 (DHX57), mRNA.	DDX57; FLJ32861	NM_198963.1
ILMN_1652023	AGFG2	-1.47901	2	5.7817	0.417169	0	1.50037	2	6.11658	0.25	0.000291313	-1.01444	ILMN_45919	AGFG2	7	Homo sapiens ArfGAP with FG repeats 2 (AGFG2), mRNA.	RABR	NM_006076.4
ILMN_1652024	CSNK1G3	235.839	2	18.8461	0	0	295.879	2	21.9467	0	6.8873	1.25458	ILMN_17895	CSNK1G3	5	Homo sapiens casein kinase 1, gamma 3 (CSNK1G3), transcript variant 2, mRNA.		NM_001031812.2
ILMN_1652037	UPP2	0.184797	2	0.931539	0.320783	0	-5.54133	2	1.24834	0.731928	-0.000291313	-29.9861	ILMN_20897	UPP2	2	Homo sapiens uridine phosphorylase 2 (UPP2), mRNA.	UPASE2; UDRPASE2; UP2	NM_173355.2
ILMN_1652056	TTN	5.69975	2	4.51789	0.141566	0	-5.18185	2	3.81906	0.712349	-0.000291313	-0.909136	ILMN_11052	TTN	2	Homo sapiens titin (TTN), transcript variant novex-3, mRNA.	HMERF; EOMFC; LGMD2J; CMPD4; FLJ39564; CMD1G; TMD; FLJ43066; FLJ26409; CMH9; FLJ26020; DKFZp451N061; FLJ32040; FLJ34413	NM_133379.2
ILMN_1652065	KCNMB1	-2.14333	2	2.59036	0.468373	0	-0.0428326	2	0.157232	0.322289	0.000291313	0.0199841	ILMN_8822	KCNMB1	5	Homo sapiens potassium large conductance calcium-activated channel, subfamily M, beta member 1 (KCNMB1), mRNA.	K(VCA)beta; SLO-BETA; hslo-beta	NM_004137.2
ILMN_1652072	MGC42105	-8.32773	2	8.39471	0.921687	0	-4.58823	2	2.54481	0.668675	0.000291313	0.550959	ILMN_7380	MGC42105	5	Homo sapiens hypothetical protein MGC42105 (MGC42105), mRNA.		NM_153361.2
ILMN_1652082	ELF4	502.398	2	98.454	0	0	585.274	2	9.57689	0	0.335155	1.16496	ILMN_29884	ELF4	X	Homo sapiens E74-like factor 4 (ets domain transcription factor) (ELF4), mRNA.	MEF; ELFR	NM_001421.2
ILMN_1652088	PAPOLB	-6.15644	2	4.71823	0.783133	0	-1.67409	2	1.13948	0.415663	0.000291313	0.271925	ILMN_138057	PAPOLB	7	Homo sapiens poly(A) polymerase beta (testis specific) (PAPOLB), mRNA.	PAPT; TPAP	NM_020144.4
ILMN_1652104	KRAS	-4.14507	2	0.720295	0.626506	0	-3.83149	2	5.18241	0.605422	0.000291313	0.924349	ILMN_24851	KRAS	12	Homo sapiens v-Ki-ras2 Kirsten rat sarcoma viral oncogene homolog (KRAS), transcript variant a, mRNA.	C-K-RAS; KRAS1; K-RAS4A; KI-RAS; KRAS2; NS3; K-RAS2B; K-RAS2A; K-RAS4B; RASK2	NM_033360.2
ILMN_1652128	LMBRD1	850.987	2	128.85	0	0	1302.64	2	158.406	0	16.5764	1.53074	ILMN_6684	LMBRD1	6	Homo sapiens LMBR1 domain containing 1 (LMBRD1), mRNA.	bA810I22.1; RP11-810I22.1; FLJ11240; C6orf209	NM_018368.2
ILMN_1652137	PPYR1	-3.53604	2	1.1249	0.575301	0	-3.60152	2	2.39832	0.569277	-0.000291313	1.01852	ILMN_420	PPYR1	10	Homo sapiens pancreatic polypeptide receptor 1 (PPYR1), mRNA.	PP1; MGC116897; NPY4R; NPY4-R; Y4	NM_005972.3
ILMN_1652147	MRPL43	103.552	2	17.41	0.00301205	0	86.3436	2	12.4241	0.0060241	-0.000291313	0.833819	ILMN_1205	MRPL43	10	Homo sapiens mitochondrial ribosomal protein L43 (MRPL43), nuclear gene encoding mitochondrial protein, transcript variant 2, mRNA.	MGC48892; MGC17989; bMRP36a	NM_176792.1
ILMN_1652161	PNKD	44.8731	2	7.94786	0.0120482	0	56.5789	2	4.94502	0.0105422	0.000291313	1.26086	ILMN_23079	PNKD	2	Homo sapiens paroxysmal nonkinesigenic dyskinesia (PNKD), transcript variant 2, mRNA.	FKSG19; KIPP1184; MR1; DKFZp564N1362; FPD1; TAHCCP2; MGC31943; DYT8; KIAA1184; BRP17; MR-1; PDC	NM_022572.3
ILMN_1652163	DVL2	449.805	2	6.74078	0	0	522.482	2	33.7355	0	3.14346	1.16158	ILMN_29320	DVL2	17	Homo sapiens dishevelled, dsh homolog 2 (Drosophila) (DVL2), mRNA.		NM_004422.2
ILMN_1652170	LOC649159	15.9404	2	10.2775	0.0466867	0	22.4294	2	4.76874	0.0286145	0.000291313	1.40708	ILMN_41099	LOC649159	16	Homo sapiens similar to CG7467-PA, isoform A (LOC649159), mRNA.		NM_001040069.1
ILMN_1652171	CDKN2C	18.328	2	6.86836	0.0361446	0	11.0654	2	3.01211	0.0783133	-0.000291313	0.603743	ILMN_18926	CDKN2C	1	Homo sapiens cyclin-dependent kinase inhibitor 2C (p18, inhibits CDK4) (CDKN2C), transcript variant 1, mRNA.	INK4C; p18; p18-INK4C	NM_001262.2
ILMN_1652178	FLJ41733	3.93822	2	1.28751	0.185241	0	7.02726	2	2.41524	0.121988	0.000291313	1.78438	ILMN_23707	FLJ41733	21	Homo sapiens FLJ41733 protein (FLJ41733), mRNA.		NM_207473.1
ILMN_1652185	IL4R	192.035	2	4.66604	0	0	196.93	2	7.6673	0	0.000291313	1.02549	ILMN_17789	IL4R	16	Homo sapiens interleukin 4 receptor (IL4R), transcript variant 1, mRNA.	IL4RA; CD124	NM_000418.2
ILMN_1652188	KIAA1632	-2.42941	2	4.89934	0.5	0	-4.84585	2	1.24414	0.685241	-0.000291313	1.99466	ILMN_32159	KIAA1632	18	Homo sapiens KIAA1632 (KIAA1632), mRNA.	HEEW1; DKFZp667P2311	NM_020964.2
ILMN_1652198	CCM2	-0.018713	2	0.931678	0.328313	0	-1.63346	2	2.17701	0.409639	-0.000291313	87.2901	ILMN_4736	CCM2	7	Homo sapiens cerebral cavernous malformation 2 (CCM2), transcript variant 1, mRNA.	MGC4067; MGC4607; C7orf22; PP10187; MGC74868	NM_001029835.1
ILMN_1652207	COX4I1	19857.2	2	147.966	0	0	18722.4	2	819.423	0	-0.000291313	0.942852	ILMN_21271	COX4I1	16	Homo sapiens cytochrome c oxidase subunit IV isoform 1 (COX4I1), mRNA.	MGC72016; COXIV; COX4	NM_001861.2
ILMN_1652219	C20orf112	0.317021	2	0.509216	0.311747	0	-0.832492	2	7.00288	0.35994	-0.000291313	-2.62599	ILMN_22438	C20ORF112	20	Homo sapiens chromosome 20 open reading frame 112 (C20orf112), mRNA.	DKFZP566G1424; dJ1184F4.2	NM_080616.1
ILMN_1652223	WDR91	56.4442	2	1.04172	0.0105422	0	65.465	2	4.59206	0.00903614	0.000291313	1.15982	ILMN_20547	WDR91	7	Homo sapiens WD repeat domain 91 (WDR91), mRNA.	HSPC049	NM_014149.2
ILMN_1652237	CBR3	437.615	2	68.9519	0	0	467.142	2	5.50532	0	0.000291313	1.06747	ILMN_8256	CBR3	21	Homo sapiens carbonyl reductase 3 (CBR3), mRNA.	hCBR3	NM_001236.3
ILMN_1652244	POPDC3	-4.30958	2	1.94014	0.64006	0	-4.37462	2	3.55598	0.662651	-0.000291313	1.01509	ILMN_21435	POPDC3	6	Homo sapiens popeye domain containing 3 (POPDC3), mRNA.	MGC22671; bA355M14.1; POP3	NM_022361.3
ILMN_1652249	PPP2R4	-2.10372	2	5.44144	0.478916	0	-2.03303	2	1.17744	0.438253	0.000291313	0.966397	ILMN_2362	PPP2R4	9	Homo sapiens protein phosphatase 2A activator, regulatory subunit 4 (PPP2R4), transcript variant 1, mRNA.	MGC2184; PR53; PTPA; PP2A	NM_178001.1
ILMN_1652277	SECTM1	22.3492	2	3.50447	0.0256024	0	35.4571	2	2.01849	0.0195783	0.000291313	1.58651	ILMN_11573	SECTM1	17	Homo sapiens secreted and transmembrane 1 (SECTM1), mRNA.	K12	NM_003004.2
ILMN_1652280	FBXO32	77.0312	2	11.0299	0.00451807	0	124.314	2	23.2137	0.00150602	6.598	1.61382	ILMN_20035	FBXO32	8	Homo sapiens F-box protein 32 (FBXO32), transcript variant 1, mRNA.	ATROGIN1; MAFbx; Fbx32; MGC33610; FLJ32424	NM_058229.2
ILMN_1652287	NOG	-2.20102	2	3.95531	0.483434	0	-4.57065	2	1.96592	0.668675	-0.000291313	2.07661	ILMN_7080	NOG	17	Homo sapiens noggin (NOG), mRNA.	SYNS1; SYM1	NM_005450.2
ILMN_1652300	ZNF507	38.9693	2	3.65286	0.0150602	0	24.482	2	3.8306	0.0271084	-0.132841	0.628237	ILMN_11628	ZNF507	19	Homo sapiens zinc finger protein 507 (ZNF507), mRNA.		NM_014910.3
ILMN_1652309	TTC8	145.398	2	7.21366	0	0	266.144	2	6.88097	0	58.6024	1.83046	ILMN_8095	TTC8	14	Homo sapiens tetratricopeptide repeat domain 8 (TTC8), transcript variant 3, mRNA.	BBS8	NM_198310.2
ILMN_1652313	RNF215	182.255	2	40.5473	0	0	220.344	2	25.6903	0	0.132841	1.20899	ILMN_13194	RNF215	22	Homo sapiens ring finger protein 215 (RNF215), mRNA.		NM_001017981.1
ILMN_1652314	SPAG1	9.92614	2	3.80644	0.0798193	0	16.078	2	0.186371	0.0436747	0.000291313	1.61976	ILMN_12212	SPAG1	8	Homo sapiens sperm associated antigen 1 (SPAG1), transcript variant 2, mRNA.	HSD-3.8; TPIS; FLJ32920; SP75	NM_172218.1
ILMN_1652333	FN3KRP	1342.19	2	86.9632	0	0	1311.12	2	45.3282	0	-0.000291313	0.976852	ILMN_14939	FN3KRP	17	Homo sapiens fructosamine-3-kinase-related protein (FN3KRP), mRNA.	FLJ12171	NM_024619.2
ILMN_1652348	FLJ46481	12.0266	2	5.04866	0.063253	0	15.3641	2	1.88483	0.0481928	0.000291313	1.27751	ILMN_12186	FLJ46481	4	Homo sapiens FLJ46481 protein (FLJ46481), mRNA.		NM_207405.1
ILMN_1652357	PDHX	1723.66	2	215.603	0	0	1712.94	2	64.4481	0	-0.000291313	0.993783	ILMN_30028	PDHX	11	Homo sapiens pyruvate dehydrogenase complex, component X (PDHX), nuclear gene encoding mitochondrial protein, mRNA.	OPDX; DLDBP; E3BP; proX; PDX1	NM_003477.1
ILMN_1652366	NLRP7	-5.4377	2	1.1573	0.743976	0	-3.99055	2	5.59117	0.621988	0.000291313	0.733867	ILMN_2155	NLRP7	19	Homo sapiens NLR family, pyrin domain containing 7 (NLRP7), transcript variant 1, mRNA.	MGC126470; PYPAF3; NALP7; HYDM; CLR19.4; PAN7; MGC126471; NOD12	NM_139176.2
ILMN_1652369	ERCC1	66.055	2	10.6376	0.0060241	0	63.5179	2	1.49882	0.00903614	-0.000291313	0.961591	ILMN_18563	ERCC1	19	Homo sapiens excision repair cross-complementing rodent repair deficiency, complementation group 1 (includes overlapping antisense sequence) (ERCC1), transcript variant 1, mRNA.	UV20; COFS4	NM_202001.1
ILMN_1652371	KIAA1324L	284.999	2	27.3947	0	0	318.055	2	19.5627	0	0.34295	1.11599	ILMN_9800	KIAA1324L	7	Homo sapiens KIAA1324-like (KIAA1324L), mRNA.	FLJ31340	NM_152748.2
ILMN_1652376	IFNA17	-4.92471	2	0.141147	0.701807	0	-6.68588	2	3.8956	0.816265	-0.000291313	1.35762	ILMN_25972	IFNA17	9	Homo sapiens interferon, alpha 17 (IFNA17), mRNA.	IFNA	NM_021268.1
ILMN_1652378	IPO7	61.2011	2	21.0874	0.00903614	0	82.2199	2	9.14837	0.0060241	0.00990252	1.34344	ILMN_28842	IPO7	11	Homo sapiens importin 7 (IPO7), mRNA.	RANBP7; FLJ14581; MGC138673	NM_006391.1
ILMN_1652379	SUCLG2	1457.14	2	63.5757	0	0	1385.73	2	53.7716	0	-0.000291313	0.95099	ILMN_20828	SUCLG2	3	Homo sapiens succinate-CoA ligase, GDP-forming, beta subunit (SUCLG2), mRNA.	G-BETA	NM_003848.1
ILMN_1652381	SIGLEC5	4.79033	2	6.15806	0.165663	0	8.72574	2	0.825088	0.10241	0.000291313	1.82153	ILMN_46534	SIGLEC5	19	Homo sapiens sialic acid binding Ig-like lectin 5 (SIGLEC5), mRNA.	OB-BP2; OBBP2; SIGLEC-5; CD170; CD33L2	NM_003830.1
ILMN_1652394	RAB2A	413.402	2	52.6998	0	0	474.643	2	1.78575	0	1.60603	1.14814	ILMN_18037	RAB2A	8	Homo sapiens RAB2A, member RAS oncogene family (RAB2A), mRNA.	RAB2	NM_002865.1
ILMN_1652397	TRPT1	-8.26052	2	4.99419	0.921687	0	-12.9353	2	4.34055	0.998494	-0.000291313	1.56592	ILMN_9909	TRPT1		Homo sapiens tRNA phosphotransferase 1 (TRPT1), transcript variant 2, mRNA.	MGC11134	NM_031472.2
ILMN_1652407	ZMYND8	169.552	2	20.2137	0	0	226.498	2	1.06123	0	10.6156	1.33586	ILMN_24433	ZMYND8	20	Homo sapiens zinc finger, MYND-type containing 8 (ZMYND8), transcript variant 1, mRNA.	RACK7; PRO2893; PRKCBP1; ZMYND8; MGC31836	NM_183047.1
ILMN_1652409	SPATA7	289.417	2	15.7265	0	0	368.211	2	47.4518	0	4.44804	1.27225	ILMN_2515	SPATA7	14	Homo sapiens spermatogenesis associated 7 (SPATA7), transcript variant 2, mRNA.	MGC102934; DKFZp686D07199; HSD3; HSD-3.1	NM_001040428.2
ILMN_1652412	PHKB	77.5854	2	37.5305	0.00451807	0	144.688	2	21.1442	0.00150602	5.81522	1.86488	ILMN_18544	PHKB	16	Homo sapiens phosphorylase kinase, beta (PHKB), transcript variant 2, mRNA.	FLJ41698; DKFZp781E15103	NM_001031835.1
ILMN_1652413	UCN2	1.60256	2	0.568223	0.254518	0	1.7076	2	5.12408	0.243976	0.000291313	1.06554	ILMN_20791	UCN2	3	Homo sapiens urocortin 2 (UCN2), mRNA.	SRP; URP; UCN-II; UCNI	NM_033199.3
ILMN_1652431	CA1	0.260352	2	1.01544	0.316265	0	-4.3838	2	0.724621	0.662651	-0.000291313	-16.838	ILMN_24125	CA1	8	Homo sapiens carbonic anhydrase I (CA1), mRNA.	Car1	NM_001738.1
ILMN_1652434	MTHFD2L	160.242	2	13.9668	0	0	132.102	2	16.9605	0.00150602	-1.11721	0.824393	ILMN_11631	MTHFD2L	4	Homo sapiens methylenetetrahydrofolate dehydrogenase (NADP+ dependent) 2-like (MTHFD2L), mRNA.	FLJ13105; MGC72244; MGC45532	NM_001004346.2
ILMN_1652439	KRTAP3-1	5.1991	2	4.17828	0.14759	0	6.06296	2	0.492932	0.135542	0.000291313	1.16616	ILMN_42633	KRTAP3-1	17	Homo sapiens keratin associated protein 3-1 (KRTAP3-1), mRNA.	KRTAP3.1; KAP3.1	NM_031958.1
ILMN_1652445	RAC1	310.06	2	16.1262	0	0	310.147	2	0.548461	0	0.000291313	1.00028	ILMN_12869	RAC1	7	Homo sapiens ras-related C3 botulinum toxin substrate 1 (rho family, small GTP binding protein Rac1) (RAC1), transcript variant Rac1b, mRNA.	MGC111543; MIG5; TC-25; p21-Rac1	NM_018890.2
ILMN_1652456	TMEM98	133.292	2	9.68437	0	0	101.677	2	1.46654	0.00301205	-3.73166	0.762818	ILMN_12943	TMEM98	17	Homo sapiens transmembrane protein 98 (TMEM98), transcript variant 1, mRNA.	DKFZP564K1964	NM_015544.2
ILMN_1652461	PARD3B	-3.83029	2	0.756818	0.590361	0	-3.97393	2	2.90485	0.621988	-0.000291313	1.0375	ILMN_24477	PARD3B	2	Homo sapiens par-3 partitioning defective 3 homolog B (C. elegans) (PARD3B), transcript variant b, mRNA.	PAR3LC; PAR3beta; Par3Lb; MGC16131; ALS2CR19; PAR3L; PAR3B	NM_152526.4
ILMN_1652464	TUBA3E	41.0635	2	14.5924	0.0135542	0	46.2359	2	4.51679	0.0150602	0.000291313	1.12596	ILMN_25380	TUBA3E	2	Homo sapiens tubulin, alpha 3e (TUBA3E), mRNA.		NM_207312.1
ILMN_1652465	SLC26A4	2.4424	2	1.14775	0.231928	0	-0.880597	2	3.83607	0.362952	-0.000291313	-0.360546	ILMN_23896	SLC26A4	7	Homo sapiens solute carrier family 26, member 4 (SLC26A4), mRNA.	PDS; DFNB4	NM_000441.1
ILMN_1652472	BRAF	28.0855	2	2.8977	0.0195783	0	44.025	2	7.498	0.0165663	0.399116	1.56754	ILMN_137245	BRAF	7	Homo sapiens v-raf murine sarcoma viral oncogene homolog B1 (BRAF), mRNA.	B-raf 1; MGC138284; BRAF1; MGC126806; RAFB1	NM_004333.3
ILMN_1652486	THAP7	236.32	2	21.3777	0	0	179.797	2	3.59089	0	-7.90011	0.760821	ILMN_5045	THAP7	22	Homo sapiens THAP domain containing 7 (THAP7), transcript variant 1, mRNA.	MGC10963	NM_030573.2
ILMN_1652487	RIOK1	115.829	2	17.1323	0.00301205	0	107.24	2	10.7789	0.00301205	-0.000291313	0.925847	ILMN_8030	RIOK1	6	Homo sapiens RIO kinase 1 (yeast) (RIOK1), transcript variant 1, mRNA.	FLJ30006; MGC12903; AD034; bA288G3.1	NM_031480.2
ILMN_1652494	FAM139A	-3.46869	2	0.585665	0.572289	0	0.438749	2	4.67769	0.299699	0.000291313	-0.126489	ILMN_34970	FAM139A	7	Homo sapiens family with sequence similarity 139, member A (FAM139A), mRNA.	FLJ40722; MGC142090	NM_173678.1
ILMN_1652505	APEX2	1041.97	2	99.002	0	0	805.028	2	12.6362	0	-12.0894	0.772599	ILMN_5062	APEX2	X	Homo sapiens APEX nuclease (apurinic/apyrimidinic endonuclease) 2 (APEX2), nuclear gene encoding mitochondrial protein, mRNA.	XTH2; APEXL2; APE2	NM_014481.2
ILMN_1652512	C2CD2	662.191	2	8.70906	0	0	635.439	2	65.1208	0	-0.000291313	0.959601	ILMN_20180	C2CD2	21	Homo sapiens C2 calcium-dependent domain containing 2 (C2CD2), transcript variant 1, mRNA.	TMEM24L; DKFZp686O198; C21orf25; MGC71445; DKFZP586F0422; C21orf258	NM_015500.1
ILMN_1652521	MTMR9	408.616	2	24.5186	0	0	574.767	2	43.1344	0	23.2381	1.40662	ILMN_9414	MTMR9	8	Homo sapiens myotubularin related protein 9 (MTMR9), mRNA.	LIP-STYX; C8orf9; DKFZp434K171; MTMR8; MGC126672	NM_015458.3
ILMN_1652525	FAM125B	144.29	2	10.1042	0	0	106.557	2	3.13815	0.00301205	-5.65849	0.738495	ILMN_20760	FAM125B	9	Homo sapiens family with sequence similarity 125, member B (FAM125B), transcript variant 1, mRNA.	FLJ00001; C9orf28	NM_033446.1
ILMN_1652540	RELL2	132.989	2	22.5513	0	0	167.629	2	17.0245	0	2.0873	1.26048	ILMN_14301	RELL2	5	Homo sapiens RELT-like 2 (RELL2), mRNA.	RELL2; FLJ90583; C5orf16	NM_173828.3
ILMN_1652549	DTNA	-6.7667	2	0.986853	0.834337	0	-6.52784	2	5.90475	0.807229	0.000291313	0.964701	ILMN_28503	DTNA	18	Homo sapiens dystrobrevin, alpha (DTNA), transcript variant 6, mRNA.	D18S892E; DTN; LVNC1; DRP3	NM_032980.2
ILMN_1652578	TSHB	-5.21002	2	1.22406	0.721386	0	-4.38671	2	10.7589	0.665663	0.000291313	0.841975	ILMN_8305	TSHB	1	Homo sapiens thyroid stimulating hormone, beta (TSHB), mRNA.	TSH-BETA	NM_000549.3
ILMN_1652580	POLD1	365.3	2	15.6855	0	0	164.651	2	3.47227	0	-73.6296	0.450729	ILMN_2618	POLD1	19	Homo sapiens polymerase (DNA directed), delta 1, catalytic subunit 125kDa (POLD1), mRNA.	CDC2; POLD	NM_002691.1
ILMN_1652594	ACTR5	342.809	2	9.65177	0	0	442.771	2	9.12211	0	12.7824	1.2916	ILMN_21862	ACTR5	20	Homo sapiens ARP5 actin-related protein 5 homolog (yeast) (ACTR5), mRNA.	FLJ12785	NM_024855.3
ILMN_1652602	C11orf35	30.3099	2	4.58654	0.0195783	0	47.9353	2	9.82923	0.0150602	0.655991	1.5815	ILMN_5140	C11ORF35	11	Homo sapiens chromosome 11 open reading frame 35 (C11orf35), mRNA.	MGC35138	NM_173573.1
ILMN_1652609	RGNEF	75.9055	2	4.5012	0.00451807	0	72.7481	2	0.844419	0.0060241	-0.000291313	0.958403	ILMN_31495	RGNEF	5	PREDICTED: Homo sapiens Rho-guanine nucleotide exchange factor, transcript variant 2 (RGNEF), mRNA.		XM_932949.2
ILMN_1652631	GLIPR2	1566.25	2	12.3448	0	0	1388.11	2	26.0033	0	-1.50208	0.886262	ILMN_12810	GLIPR2	9	Homo sapiens GLI pathogenesis-related 2 (GLIPR2), mRNA.	GLIPR2; GAPR-1	NM_022343.2
ILMN_1652647	INPP4A	26.1652	2	1.96987	0.0225904	0	37.9069	2	4.71779	0.0180723	0.000291313	1.44875	ILMN_19517	INPP4A	2	Homo sapiens inositol polyphosphate-4-phosphatase, type I, 107kDa (INPP4A), transcript variant a, mRNA.	INPP4	NM_004027.1
ILMN_1652650	SH3KBP1	2.07232	2	0.912072	0.24247	0	-0.37812	2	1.11513	0.335843	-0.000291313	-0.182462	ILMN_22300	SH3KBP1	X	Homo sapiens SH3-domain kinase binding protein 1 (SH3KBP1), transcript variant 2, mRNA.	MIG18; GIG10; CIN85	NM_001024666.1
ILMN_1652662	GRB10	8.12075	2	1.63425	0.108434	0	15.3669	2	3.36934	0.0481928	0.000291313	1.8923	ILMN_6988	GRB10	7	Homo sapiens growth factor receptor-bound protein 10 (GRB10), transcript variant 4, mRNA.	RSS; GRB-IR; IRBP; KIAA0207; Grb-10; MEG1	NM_001001555.1
ILMN_1652677	FAM89A	268.646	2	21.6126	0	0	307.981	2	5.78978	0	1.57464	1.14642	ILMN_21686	FAM89A	1	Homo sapiens family with sequence similarity 89, member A (FAM89A), mRNA.	RP11-423F24.2; C1orf153; MGC15887	NM_198552.1
ILMN_1652693	SHH	29.2343	2	1.80701	0.0195783	0	32.9074	2	14.8005	0.0210843	0.000291313	1.12564	ILMN_27314	SHH	7	Homo sapiens sonic hedgehog homolog (Drosophila) (SHH), mRNA.	TPTPS; HHG1; HPE3; TPT; SMMCI; HLP3	NM_000193.2
ILMN_1652694	FAM131B	58.6709	2	4.9258	0.00903614	0	40.7784	2	3.26854	0.0165663	-0.931196	0.695037	ILMN_27415	FAM131B	7	Homo sapiens family with sequence similarity 131, member B (FAM131B), mRNA.	KIAA0773	NM_001031690.1
ILMN_1652715	C10orf111	0.564186	2	7.21116	0.293675	0	5.26502	2	0.225477	0.149096	0.000291313	9.33206	ILMN_24387	C10ORF111	10	Homo sapiens chromosome 10 open reading frame 111 (C10orf111), mRNA.	bA455B2.4; MGC35468	NM_153244.1
ILMN_1652716	THEX1	44.9852	2	8.86099	0.0120482	0	19.1332	2	1.07683	0.0331325	-4.07162	0.425322	ILMN_9945	THEX1	8	Homo sapiens three prime histone mRNA exonuclease 1 (THEX1), mRNA.	MGC35395; 3'HEXO	NM_153332.2
ILMN_1652719	TMCO5A	19.4455	2	5.9493	0.0331325	0	14.4478	2	4.87328	0.0512048	-0.000291313	0.74299	ILMN_25640	TMCO5A	15	Homo sapiens transmembrane and coiled-coil domains 5A (TMCO5A), mRNA.	MGC35118; FLJ35807	NM_152453.2
ILMN_1652722	C14orf2	1502.57	2	351.661	0	0	1759.44	2	131.701	0	0.000291313	1.17096	ILMN_29919	C14ORF2	14	Homo sapiens chromosome 14 open reading frame 2 (C14orf2), mRNA.	PLPM; MP68	NM_004894.1
ILMN_1652727	GLT8D1	-0.0939893	2	6.37051	0.328313	0	4.53152	2	1.9036	0.161145	0.000291313	-48.2131	ILMN_451	GLT8D1	3	Homo sapiens glycosyltransferase 8 domain containing 1 (GLT8D1), transcript variant 1, mRNA.	FLJ14611; AD-017; MSTP139; DKFZp781O20198	NM_152932.1
ILMN_1652729	ANK2	-1.00941	2	0.0716384	0.399096	0	-6.59235	2	1.66776	0.808735	-0.000291313	6.53093	ILMN_12447	ANK2	4	Homo sapiens ankyrin 2, neuronal (ANK2), transcript variant 1, mRNA.	DKFZp686P0948; FLJ38277; DKFZp686M09125; LQT4	NM_001148.3
ILMN_1652732	HTR7	31.6795	2	13.3133	0.0180723	0	50.1466	2	3.89222	0.0150602	0.462131	1.58293	ILMN_28645	HTR7	10	Homo sapiens 5-hydroxytryptamine (serotonin) receptor 7 (adenylate cyclase-coupled) (HTR7), transcript variant d, mRNA.	5-HT7	NM_019859.2
ILMN_1652736	RPS6KA3	77.5708	2	31.8287	0.00451807	0	107.255	2	31.7738	0.00301205	0.000291313	1.38268	ILMN_4020	RPS6KA3	X	Homo sapiens ribosomal protein S6 kinase, 90kDa, polypeptide 3 (RPS6KA3), mRNA.	pp90RSK2; MAPKAPK1B; CLS; RSK2; RSK; S6K-alpha3; p90-RSK2; ISPK-1; MRX19; HU-3	NM_004586.2
ILMN_1652749	ERF	282.601	2	63.9048	0	0	287.175	2	99.9939	0	0.000291313	1.01619	ILMN_14193	ERF	19	Homo sapiens Ets2 repressor factor (ERF), mRNA.	PE-2	NM_006494.1
ILMN_1652753	PAAF1	469.443	2	16.4092	0	0	555.442	2	74.7715	0	1.32475	1.18319	ILMN_13656	PAAF1	11	Homo sapiens proteasomal ATPase-associated factor 1 (PAAF1), mRNA.	WDR71; FLJ11848; PAAF	NM_025155.1
ILMN_1652754	ZNF428	3604.27	2	234.336	0	0	2749.34	2	80.1042	0	-14.2875	0.7628	ILMN_2963	ZNF428	19	Homo sapiens zinc finger protein 428 (ZNF428), mRNA.	MGC51082; Zfp428; C19orf37	NM_182498.2
ILMN_1652762	HIC2	379.906	2	62.2075	0	0	399.298	2	10.6478	0	0.000291313	1.05104	ILMN_22371	HIC2	22	Homo sapiens hypermethylated in cancer 2 (HIC2), mRNA.	KIAA1020; ZBTB30; HRG22	NM_015094.2
ILMN_1652777	CDC42EP2	345.348	2	22.8321	0	0	372.449	2	8.42521	0	0.000291313	1.07847	ILMN_3335	CDC42EP2	11	Homo sapiens CDC42 effector protein (Rho GTPase binding) 2 (CDC42EP2), mRNA.	CEP2; BORG1	NM_006779.2
ILMN_1652780	TMOD2	-3.81279	2	0.21526	0.591867	0	-5.1589	2	0.3777	0.710843	-0.000291313	1.35305	ILMN_12247	TMOD2	15	Homo sapiens tropomodulin 2 (neuronal) (TMOD2), mRNA.	NTMOD; MGC39481	NM_014548.2
ILMN_1652787	PIK3AP1	23.2804	2	7.64785	0.0256024	0	54.1335	2	2.11141	0.0120482	6.66587	2.32528	ILMN_8843	PIK3AP1	10	Homo sapiens phosphoinositide-3-kinase adaptor protein 1 (PIK3AP1), mRNA.	BCAP; RP11-34E5.3	NM_152309.2
ILMN_1652790	CLK1	118.573	2	0.144167	0.00150602	0	166.502	2	24.1314	0	5.74413	1.40422	ILMN_27652	CLK1	2	Homo sapiens CDC-like kinase 1 (CLK1), mRNA.	STY; CLK; CLK/STY	NM_004071.2
ILMN_1652797	FAM174B	337.095	2	49.7464	0	0	317.905	2	29.5572	0	-0.000291313	0.943072	ILMN_1130	FAM174B	15	Homo sapiens family with sequence similarity 174, member B (FAM174B), mRNA.	MGC102891	NM_207446.2
ILMN_1652806	ATP5J	1183.6	2	370.101	0	0	1318.64	2	150.89	0	0.000291313	1.11409	ILMN_29169	ATP5J	21	Homo sapiens ATP synthase, H+ transporting, mitochondrial F0 complex, subunit F6 (ATP5J), nuclear gene encoding mitochondrial protein, transcript variant 1, mRNA.	ATP5A; CF6; F6; ATPM; ATP5	NM_001003703.1
ILMN_1652807	HOXA3	-1.45419	2	0.897112	0.423193	0	-1.96504	2	0.772414	0.433735	-0.000291313	1.3513	ILMN_138124	HOXA3	7	Homo sapiens homeobox A3 (HOXA3), transcript variant 1, mRNA.	MGC10155; HOX1E; HOX1	NM_030661.4
ILMN_1652825	IL10RA	8.17843	2	4.09887	0.108434	0	8.74413	2	0.503642	0.100904	0.000291313	1.06917	ILMN_17252	IL10RA	11	Homo sapiens interleukin 10 receptor, alpha (IL10RA), mRNA.	IL-10R1; CDW210A; IL10R; HIL-10R	NM_001558.2
ILMN_1652826	LRRC17	-4.15405	2	0.193831	0.626506	0	-3.77082	2	0.0871511	0.593373	0.000291313	0.907746	ILMN_5522	LRRC17	7	Homo sapiens leucine rich repeat containing 17 (LRRC17), transcript variant 2, mRNA.	P37NB	NM_005824.1
ILMN_1652852	GAS2	-4.3351	2	7.54307	0.629518	0	-0.766683	2	2.26886	0.358434	0.000291313	0.176855	ILMN_25867	GAS2	11	Homo sapiens growth arrest-specific 2 (GAS2), transcript variant 2, mRNA.	MGC32610	NM_177553.1
ILMN_1652857	SLC15A1	-4.22623	2	3.17663	0.626506	0	-3.29727	2	4.7734	0.528614	0.000291313	0.780193	ILMN_11327	SLC15A1	13	Homo sapiens solute carrier family 15 (oligopeptide transporter), member 1 (SLC15A1), mRNA.	PEPT1; HPECT1; HPEPT1	NM_005073.2
ILMN_1652866	LMX1B	2.60961	2	7.48336	0.218373	0	-0.262559	2	0.609589	0.331325	-0.000291313	-0.100612	ILMN_8639	LMX1B	9	Homo sapiens LIM homeobox transcription factor 1, beta (LMX1B), mRNA.	LMX1.2; MGC142051; NPS1; MGC138325	NM_002316.1
ILMN_1652872	UBOX5	27.4038	2	8.68871	0.0210843	0	48.8185	2	9.2037	0.0150602	1.64155	1.78145	ILMN_8675	UBOX5	20	Homo sapiens U-box domain containing 5 (UBOX5), transcript variant 1, mRNA.	UBCE7IP5; RNF37; KIAA0860; UIP5	NM_014948.2
ILMN_1652906	GBGT1	1.38658	2	1.61221	0.262048	0	5.42879	2	2.89916	0.146084	0.000291313	3.91524	ILMN_18833	GBGT1	9	Homo sapiens globoside alpha-1,3-N-acetylgalactosaminyltransferase 1 (GBGT1), mRNA.	FS; MGC44848; UNQ2513; RP11-326L24.6; A3GALNT	NM_021996.3
ILMN_1652907	CDC5L	747.465	2	138.803	0	0	763.024	2	25.2471	0	0.000291313	1.02082	ILMN_15507	CDC5L	6	Homo sapiens CDC5 cell division cycle 5-like (S. pombe) (CDC5L), mRNA.	KIAA0432; CEF1; PCDC5RP; dJ319D22.1; hCDC5	NM_001253.2
ILMN_1652913	EZH2	127.397	2	36.2324	0.00150602	0	93.8858	2	19.5671	0.00451807	-0.151697	0.736953	ILMN_25740	EZH2	7	Homo sapiens enhancer of zeste homolog 2 (Drosophila) (EZH2), transcript variant 1, mRNA.	EZH1; ENX-1; MGC9169; KMT6	NM_004456.3
ILMN_1652918	RHOF	90.4656	2	12.1395	0.00451807	0	172.349	2	31.4178	0	15.5811	1.90514	ILMN_1762	RHOF	12	Homo sapiens ras homolog gene family, member F (in filopodia) (RHOF), mRNA.	ARHF; RIF; FLJ20247	NM_019034.2
ILMN_1652929	POGZ	29.7494	2	11.949	0.0195783	0	34.7829	2	1.93066	0.0195783	0.000291313	1.16919	ILMN_14081	POGZ	1	Homo sapiens pogo transposable element with ZNF domain (POGZ), transcript variant 1, mRNA.	ZNF280E; ZNF635m; SUHW5; MGC71543; KIAA0461; ZNF635	NM_015100.2
ILMN_1652938	PRRG3	0.701945	2	1.18251	0.293675	0	-3.20205	2	4.00403	0.524096	-0.000291313	-4.56168	ILMN_5299	PRRG3	X	Homo sapiens proline rich Gla (G-carboxyglutamic acid) 3 (transmembrane) (PRRG3), mRNA.	MGC156177; MGC149510; PRGP3; TMG3	NM_024082.2
ILMN_1652952	RASAL2	-10.7754	2	0.843565	0.990964	0	-6.07238	2	1.48708	0.778614	0.000291313	0.56354	ILMN_26623	RASAL2	1	Homo sapiens RAS protein activator like 2 (RASAL2), transcript variant 1, mRNA.	MGC129919; nGAP	NM_004841.2
ILMN_1652975	DLK1	-1.25734	2	0.358904	0.411145	0	-0.861174	2	1.22542	0.362952	0.000291313	0.684916	ILMN_13065	DLK1	14	Homo sapiens delta-like 1 homolog (Drosophila) (DLK1), mRNA.	DLK; ZOG; Pref-1; FA1; pG2; PREF1	NM_003836.4
ILMN_1652989	NUP160	1271.28	2	46.8034	0	0	1031.24	2	28.3587	0	-7.67838	0.811183	ILMN_14404	NUP160	11	Homo sapiens nucleoporin 160kDa (NUP160), mRNA.	MGC150679; MGC150678	NM_015231.1
ILMN_1652992	PRDM2	-5.98669	2	1.53242	0.781627	0	1.97351	2	8.23366	0.23494	0.000291313	-0.329649	ILMN_12362	PRDM2	1	Homo sapiens PR domain containing 2, with ZNF domain (PRDM2), transcript variant 2, mRNA.	RIZ1; MTB-ZF; KMT8; HUMHOXY1; RIZ2; RIZ	NM_015866.3
ILMN_1652998	HIST1H2BL	6.16819	2	1.34945	0.135542	0	-3.16562	2	3.39179	0.52259	-0.000291313	-0.513218	ILMN_27190	HIST1H2BL	6	Homo sapiens histone cluster 1, H2bl (HIST1H2BL), mRNA.	H2B/c; dJ97D16.4; H2BFC	NM_003519.3
ILMN_1653001	CABLES1	279.35	2	1.23493	0	0	218.841	2	15.9742	0	-6.7902	0.783393	ILMN_26976	CABLES1	18	Homo sapiens Cdk5 and Abl enzyme substrate 1 (CABLES1), transcript variant 1, mRNA.	FLJ35924; HsT2563	NM_138375.1
ILMN_1653006	CSN1S1	-1.64444	2	0.501911	0.432229	0	-2.90536	2	2.07377	0.503012	-0.000291313	1.76678	ILMN_5057	CSN1S1	4	Homo sapiens casein alpha s1 (CSN1S1), transcript variant 1, mRNA.	CSN1; MGC149368; casein; CASA	NM_001890.1
ILMN_1653028	COL4A1	18.5032	2	2.23979	0.0346385	0	19.4185	2	2.53042	0.0316265	0.000291313	1.04947	ILMN_24359	COL4A1	13	Homo sapiens collagen, type IV, alpha 1 (COL4A1), mRNA.	arresten	NM_001845.4
ILMN_1653040	PCDHGA12	-1.53739	2	3.35965	0.424699	0	-3.56346	2	3.02912	0.564759	-0.000291313	2.31786	ILMN_9233	PCDHGA12	5	Homo sapiens protocadherin gamma subfamily A, 12 (PCDHGA12), transcript variant 1, mRNA.	PCDH-GAMMA-A12; CDH21; KIAA0588; FIB3	NM_003735.2
ILMN_1653042	HSD3B7	495.31	2	9.05046	0	0	316.929	2	12.0621	0	-31.4772	0.639861	ILMN_15907	HSD3B7	16	Homo sapiens hydroxy-delta-5-steroid dehydrogenase, 3 beta- and steroid delta-isomerase 7 (HSD3B7), mRNA.	PFIC4	NM_025193.2
ILMN_1653055	SOX3	-0.878604	2	0.20943	0.391566	0	-4.6267	2	3.24532	0.670181	-0.000291313	5.26597	ILMN_16823	SOX3	X	Homo sapiens SRY (sex determining region Y)-box 3 (SOX3), mRNA.	SOXB; MRGH	NM_005634.2
ILMN_1653073	OR10Q1	-7.64668	2	4.51574	0.891566	0	-7.4188	2	1.39652	0.870482	0.000291313	0.970199	ILMN_4400	OR10Q1	11	Homo sapiens olfactory receptor, family 10, subfamily Q, member 1 (OR10Q1), mRNA.	OR11-233	NM_001004471.1
ILMN_1653102	CCDC64	-0.0736112	2	2.6531	0.329819	0	2.3644	2	1.69745	0.213855	0.000291313	-32.1201	ILMN_775	CCDC64	12	Homo sapiens coiled-coil domain containing 64 (CCDC64), mRNA.	H_267D11.1; FLJ26450	NM_207311.1
ILMN_1653103	C20orf152	-1.09774	2	1.34323	0.409639	0	0.619299	2	1.30362	0.290663	0.000291313	-0.564159	ILMN_17190	C20ORF152	20	Homo sapiens chromosome 20 open reading frame 152 (C20orf152), mRNA.	dJ954P9.1; MGC138880	NM_080834.1
ILMN_1653115	ECH1	3063.43	2	362.584	0	0	4142.25	2	344.514	0	15.7794	1.35216	ILMN_28288	ECH1	19	Homo sapiens enoyl Coenzyme A hydratase 1, peroxisomal (ECH1), mRNA.	HPXEL	NM_001398.2
ILMN_1653120	ST6GAL1	8.54402	2	8.28102	0.108434	0	1.71524	2	3.77518	0.245482	-0.000291313	0.200754	ILMN_16178	ST6GAL1	3	Homo sapiens ST6 beta-galactosamide alpha-2,6-sialyltranferase 1 (ST6GAL1), transcript variant 2, mRNA.	SIAT1; ST6GalI; CD75; ST6Gal I; MGC48859	NM_003032.2
ILMN_1653125	PER1	7.69233	2	11.453	0.10994	0	12.936	2	0.676211	0.0572289	0.000291313	1.68167	ILMN_16811	PER1	17	Homo sapiens period homolog 1 (Drosophila) (PER1), mRNA.	PER; MGC88021; RIGUI; hPER	NM_002616.1
ILMN_1653129	CSTF2	572.835	2	32.8475	0	0	467.387	2	11.27	0	-6.2789	0.815919	ILMN_23194	CSTF2	X	Homo sapiens cleavage stimulation factor, 3' pre-RNA, subunit 2, 64kDa (CSTF2), mRNA.	CstF-64	NM_001325.2
ILMN_1653133	SH3D19	738.704	2	67.4685	0	0	1014.34	2	14.5249	0	26.2738	1.37314	ILMN_9084	SH3D19	4	Homo sapiens SH3 domain containing 19 (SH3D19), mRNA.	MGC118913; EVE1; MGC118910; Kryn; SH3P19; MGC118911; MGC118912; MGC105136; EBP	NM_001009555.2
ILMN_1653146	MSH4	14.8049	2	6.74192	0.0496988	0	24.0907	2	2.75593	0.0271084	0.000291313	1.62721	ILMN_14086	MSH4	1	Homo sapiens mutS homolog 4 (E. coli) (MSH4), mRNA.		NM_002440.2
ILMN_1653158	DPRX	-6.49407	2	0.94039	0.816265	0	-3.40332	2	3.56636	0.552711	0.000291313	0.524066	ILMN_21343	DPRX	19	Homo sapiens divergent-paired related homeobox (DPRX), mRNA.		NM_001012728.1
ILMN_1653161	SNCG	-2.90477	2	3.82495	0.537651	0	-6.99146	2	2.16559	0.837349	-0.000291313	2.40689	ILMN_3755	SNCG	10	Homo sapiens synuclein, gamma (breast cancer-specific protein 1) (SNCG), mRNA.	BCSG1; SR	NM_003087.1
ILMN_1653163	ZSCAN2	12.7376	2	3.10111	0.060241	0	25.9436	2	10.5355	0.0271084	0.000291313	2.03678	ILMN_20767	ZSCAN2	15	Homo sapiens zinc finger and SCAN domain containing 2 (ZSCAN2), transcript variant 3, mRNA.	FLJ20595; ZFP29	NM_001007072.1
ILMN_1653165	AAMP	462.371	2	32.0804	0	0	540.408	2	7.03247	0	3.70238	1.16878	ILMN_26068	AAMP	2	Homo sapiens angio-associated, migratory cell protein (AAMP), mRNA.		NM_001087.3
ILMN_1653166	CLEC10A	0.150591	2	3.92156	0.316265	0	-4.03136	2	1.0146	0.631024	-0.000291313	-26.7703	ILMN_11630	CLEC10A	17	Homo sapiens C-type lectin domain family 10, member A (CLEC10A), transcript variant 2, mRNA.	HML; CD301; HML2; CLECSF13; CLECSF14	NM_006344.2
ILMN_1653174	GCNT2	-4.47379	2	0.435887	0.658133	0	-5.95106	2	4.3419	0.763554	-0.000291313	1.3302	ILMN_137985	GCNT2	6	Homo sapiens glucosaminyl (N-acetyl) transferase 2, I-branching enzyme (I blood group) (GCNT2), transcript variant 3, mRNA.	MGC163396; CCAT; GCNT5; bA421M1.1; IGNT; bA360O19.2; NAGCT1; ULG3; GCNT2C; NACGT1; II	NM_145655.3
ILMN_1653200	SLC22A17	10.9868	2	2.87801	0.0692771	0	11.0374	2	8.80608	0.0783133	0.000291313	1.00461	ILMN_10076	SLC22A17	14	Homo sapiens solute carrier family 22, member 17 (SLC22A17), transcript variant 2, mRNA.	BOIT; BOCT; NGALR; hBOIT	NM_016609.3
ILMN_1653203	EFEMP2	8.11489	2	4.51263	0.108434	0	22.5219	2	2.44237	0.0286145	0.232599	2.77538	ILMN_137851	EFEMP2	11	Homo sapiens EGF-containing fibulin-like extracellular matrix protein 2 (EFEMP2), mRNA.	UPH1; FBLN4; MBP1	NM_016938.2
ILMN_1653209	ZWINT	34.5617	2	3.99745	0.0165663	0	7.11546	2	1.93511	0.121988	-5.75301	0.205877	ILMN_23253	ZWINT	10	Homo sapiens ZW10 interactor (ZWINT), transcript variant 2, mRNA.	HZwint-1; MGC117174; KNTC2AP	NM_032997.2
ILMN_1653211	ATP1B4	-6.92226	2	3.38276	0.838855	0	-6.25606	2	5.15601	0.787651	0.000291313	0.903759	ILMN_29810	ATP1B4	X	Homo sapiens ATPase, (Na+)/K+ transporting, beta 4 polypeptide (ATP1B4), mRNA.		NM_012069.2
ILMN_1653220	PITPNM1	1357.32	2	18.1805	0	0	916.469	2	25.2876	0	-29.0288	0.675207	ILMN_18155	PITPNM1	11	Homo sapiens phosphatidylinositol transfer protein, membrane-associated 1 (PITPNM1), mRNA.	NIR2; PITPNM; RDGBA1; FLJ44997; RDGB1; RDGB; Rd9; DRES9	NM_004910.1
ILMN_1653228	C3orf22	0.969157	2	0.228942	0.281627	0	3.7462	2	3.98668	0.170181	0.000291313	3.86543	ILMN_29024	C3ORF22	3	Homo sapiens chromosome 3 open reading frame 22 (C3orf22), mRNA.	MGC34728	NM_152533.1
ILMN_1653251	HIST1H1B	1.35815	2	3.7094	0.262048	0	-2.3183	2	0.532844	0.456325	-0.000291313	-1.70695	ILMN_10990	HIST1H1B	6	Homo sapiens histone cluster 1, H1b (HIST1H1B), mRNA.	H1.5; MGC126632; H1; MGC126630; H1F5	NM_005322.2
ILMN_1653263	GPRIN1	68.9415	2	11.5075	0.00451807	0	55.7032	2	11.9364	0.0105422	-0.000291313	0.807978	ILMN_15887	GPRIN1	5	Homo sapiens G protein regulated inducer of neurite outgrowth 1 (GPRIN1), mRNA.	KIAA1893; GRIN1	NM_052899.2
ILMN_1653267	GPR26	10.3156	2	2.13451	0.0737952	0	1.96375	2	2.12329	0.233434	-0.000291313	0.190367	ILMN_23337	GPR26	10	Homo sapiens G protein-coupled receptor 26 (GPR26), mRNA.	MGC138216	NM_153442.1
ILMN_1653278	MUC20	-3.40379	2	3.11236	0.560241	0	2.94385	2	1.27124	0.200301	0.000291313	-0.864874	ILMN_18898	MUC20	3	Homo sapiens mucin 20, cell surface associated (MUC20), transcript variant S, mRNA.	FLJ14408; KIAA1359	NM_001098516.1
ILMN_1653282	LCE2A	-0.684215	2	0.389286	0.379518	0	-5.89921	2	6.10759	0.763554	-0.000291313	8.62187	ILMN_4011	LCE2A	1	Homo sapiens late cornified envelope 2A (LCE2A), mRNA.	LEP9	NM_178428.3
ILMN_1653283	APP	137.535	2	25.4531	0	0	182.723	2	45.6782	0	0.562715	1.32855	ILMN_30235	APP	21	Homo sapiens amyloid beta (A4) precursor protein (APP), transcript variant 1, mRNA.	AD1; ABETA; CTFgamma; APPI; ABPP; CVAP; PN2; AAA	NM_000484.2
ILMN_1653292	PFKFB4	363.202	2	2.11857	0	0	699.581	2	13.5957	0	118.433	1.92615	ILMN_25315	PFKFB4	3	Homo sapiens 6-phosphofructo-2-kinase/fructose-2,6-biphosphatase 4 (PFKFB4), mRNA.		NM_004567.2
ILMN_1653310	ZNF580	22.2823	2	7.38805	0.0271084	0	15.7494	2	8.02804	0.0451807	-0.000291313	0.70681	ILMN_7148	ZNF580	19	Homo sapiens zinc finger protein 580 (ZNF580), transcript variant 2, mRNA.		NM_207115.1
ILMN_1653319	MC1R	205.933	2	19.1393	0	0	215.115	2	23.893	0	0.000291313	1.04459	ILMN_25536	MC1R	16	Homo sapiens melanocortin 1 receptor (alpha melanocyte stimulating hormone receptor) (MC1R), mRNA.	SHEP1; MSH-R; MGC14337	NM_002386.2
ILMN_1653332	FAM29A	-3.90157	2	1.65696	0.59488	0	-7.04086	2	1.11501	0.838855	-0.000291313	1.80462	ILMN_137115	FAM29A	9	Homo sapiens family with sequence similarity 29, member A (FAM29A), mRNA.	MGC102696; MGC138798; RP11-296P7.3; MGC138799	NM_017645.3
ILMN_1653337	USP32	20.1583	2	8.33961	0.0316265	0	41.2398	2	14.8807	0.0165663	0.773913	2.0458	ILMN_36215	USP32	17	Homo sapiens ubiquitin specific peptidase 32 (USP32), mRNA.	USP10; NY-REN-60	NM_032582.3
ILMN_1653340	RECQL5	2.54343	2	1.75165	0.225904	0	9.97689	2	1.47318	0.0828313	0.000291313	3.92262	ILMN_3547	RECQL5	17	Homo sapiens RecQ protein-like 5 (RECQL5), transcript variant 2, mRNA.	FLJ90603; RECQ5	NM_001003715.2
ILMN_1653342	DUS1L	183.483	2	17.4855	0	0	126.132	2	20.7017	0.00150602	-8.28114	0.687431	ILMN_1077	DUS1L	17	Homo sapiens dihydrouridine synthase 1-like (S. cerevisiae) (DUS1L), mRNA.	DUS1; PP3111	NM_022156.3
ILMN_1653358	FUT3	58.1012	2	10.6155	0.00903614	0	66.6973	2	16.6229	0.00753012	0.000291313	1.14795	ILMN_10592	FUT3	19	Homo sapiens fucosyltransferase 3 (galactoside 3(4)-L-fucosyltransferase, Lewis blood group) (FUT3), transcript variant 4, mRNA.	CD174; MGC131739; Les; FucT-III; FT3B; LE	NM_001097641.1
ILMN_1653372	ATP8B3	3.72272	2	3.99728	0.194277	0	4.64967	2	4.51751	0.158133	0.000291313	1.249	ILMN_25622	ATP8B3	19	Homo sapiens ATPase, class I, type 8B, member 3 (ATP8B3), mRNA.	ATPIK	NM_138813.2
ILMN_1653376	FAM171B	23.0353	2	8.07209	0.0256024	0	20.0604	2	1.52123	0.0301205	-0.000291313	0.870856	ILMN_12991	FAM171B	2	Homo sapiens family with sequence similarity 171, member B (FAM171B), mRNA.	FLJ34104	NM_177454.3
ILMN_1653385	KIF3A	20.7267	2	1.60663	0.0301205	0	31.0769	2	2.01933	0.0225904	0.000291313	1.49936	ILMN_138303	KIF3A	5	Homo sapiens kinesin family member 3A (KIF3A), mRNA.		NM_007054.5
ILMN_1653386	SULT6B1	11.4504	2	2.51434	0.0677711	0	14.4973	2	1.65842	0.0512048	0.000291313	1.26609	ILMN_13338	SULT6B1	2	Homo sapiens sulfotransferase family, cytosolic, 6B, member 1 (SULT6B1), mRNA.		NM_001032377.1
ILMN_1653404	NKIRAS2	234.596	2	10.0827	0	0	244.106	2	5.92147	0	0.000291313	1.04053	ILMN_1324	NKIRAS2	17	Homo sapiens NFKB inhibitor interacting Ras-like 2 (NKIRAS2), transcript variant 2, mRNA.	KBRAS2; MGC74742; kappaB-Ras2; DKFZP434N1526	NM_017595.4
ILMN_1653412	RAXL1	175.254	2	20.5693	0	0	269.982	2	62.4724	0	5.28096	1.54052	ILMN_21452	RAXL1	19	Homo sapiens retina and anterior neural fold homeobox like 1 (RAXL1), mRNA.	QRX; MGC15631; ARMD6; CORD11	NM_032753.2
ILMN_1653428	SPINK9	-7.59918	2	3.03287	0.891566	0	-6.5338	2	0.254966	0.807229	0.000291313	0.859803	ILMN_44468	SPINK9	5	Homo sapiens serine peptidase inhibitor, Kazal type 9 (SPINK9), mRNA.	LEKTI2	NM_001040433.1
ILMN_1653429	SLC35A3	1677.97	2	71.5594	0	0	2048.82	2	163.614	0	6.8323	1.22101	ILMN_10145	SLC35A3	1	Homo sapiens solute carrier family 35 (UDP-N-acetylglucosamine (UDP-GlcNAc) transporter), member A3 (SLC35A3), mRNA.	DKFZp781P1297	NM_012243.1
ILMN_1653432	HNRPDL	791.775	2	100.04	0	0	834.825	2	136.27	0	0.000291313	1.05437	ILMN_29342	HNRPDL	4	Homo sapiens heterogeneous nuclear ribonucleoprotein D-like (HNRPDL), transcript variant 3, transcribed RNA.	JKTBP2; JKTBP; laAUF1; HNRNP	NR_003249.1
ILMN_1653434	DMD	36.8765	2	0.583609	0.0150602	0	36.7568	2	5.06795	0.0195783	-0.000291313	0.996755	ILMN_3306	DMD	X	Homo sapiens dystrophin (DMD), transcript variant Dp427m, mRNA.	DXS272; DXS269; DXS268; DXS270; DXS239; DXS142; DXS206; DXS230; CMD3B; DXS164; BMD	NM_004006.1
ILMN_1653438	PHF14	557.813	2	85.7783	0	0	680.25	2	17.8838	0	4.01246	1.21949	ILMN_2096	PHF14	7	Homo sapiens PHD finger protein 14 (PHF14), transcript variant 1, mRNA.	MGC176640	NM_001007157.1
ILMN_1653443	CDK2	179.117	2	72.8649	0	0	148.527	2	23.729	0.00150602	-0.000291313	0.82922	ILMN_12332	CDK2	12	Homo sapiens cyclin-dependent kinase 2 (CDK2), transcript variant 1, mRNA.	p33(CDK2)	NM_001798.2
ILMN_1653447	PSORS1C2	1.9692	2	3.76531	0.243976	0	1.19631	2	1.34724	0.260542	-0.000291313	0.60751	ILMN_11396	PSORS1C2	6	Homo sapiens psoriasis susceptibility 1 candidate 2 (PSORS1C2), mRNA.	C6orf17; SPR1	NM_014069.1
ILMN_1653453	MID1	-2.15579	2	1.40073	0.46988	0	-9.51989	2	1.54983	0.948795	-0.000291313	4.41596	ILMN_4277	MID1	X	Homo sapiens midline 1 (Opitz/BBB syndrome) (MID1), transcript variant 3, mRNA.	RNF59; OGS1; TRIM18; FXY; OS; XPRF; GBBB1; OSX; BBBG1; ZNFXY	NM_033290.1
ILMN_1653459	IL11RA	-1.78094	2	1.70199	0.450301	0	-6.22509	2	0.518708	0.786145	-0.000291313	3.49539	ILMN_11999	IL11RA	9	Homo sapiens interleukin 11 receptor, alpha (IL11RA), transcript variant 2, mRNA.	MGC2146	NM_147162.1
ILMN_1653461	MGC48628	-1.84983	2	5.81857	0.463855	0	-0.125073	2	1.81905	0.328313	0.000291313	0.0676136	ILMN_10455	MGC48628	4	Homo sapiens similar to KIAA1680 protein (MGC48628), mRNA.		NM_207491.1
ILMN_1653463	SULT1C3	9.17225	2	5.90966	0.0918675	0	-1.04356	2	0.363513	0.375	-0.000291313	-0.113773	ILMN_7874	SULT1C3	2	Homo sapiens sulfotransferase family, cytosolic, 1C, member 3 (SULT1C3), mRNA.		NM_001008743.1
ILMN_1653466	HES4	4923.96	2	1020.46	0	0	2475.73	2	89.4941	0	-19.699	0.502792	ILMN_18566	HES4	1	Homo sapiens hairy and enhancer of split 4 (Drosophila) (HES4), mRNA.		NM_021170.2
ILMN_1653480	KENAE	47.5746	2	7.78667	0.0105422	0	55.5096	2	12.8074	0.0105422	0.000291313	1.16679	ILMN_138903	KENAE	5	Homo sapiens Kenae (KENAE), mRNA.		NM_176816.2
ILMN_1653494	S100A1	8.45288	2	9.81563	0.108434	0	20.9631	2	7.75051	0.0301205	0.000291313	2.48	ILMN_7545	S100A1	1	Homo sapiens S100 calcium binding protein A1 (S100A1), mRNA.	S100; S100-alpha; S100A	NM_006271.1
ILMN_1653496	GLUL	7.37578	2	1.42076	0.115964	0	9.47386	2	1.20834	0.0903614	0.000291313	1.28446	ILMN_25881	GLUL	1	Homo sapiens glutamate-ammonia ligase (glutamine synthetase) (GLUL), transcript variant 3, mRNA.	GLNS; GS; PIG59; PIG43	NM_001033056.1
ILMN_1653498	IGSF6	2.40529	2	0.119544	0.233434	0	0.263701	2	2.31232	0.310241	-0.000291313	0.109634	ILMN_7979	IGSF6	16	Homo sapiens immunoglobulin superfamily, member 6 (IGSF6), mRNA.	DORA	NM_005849.1
ILMN_1653501	SEMA3B	131.554	2	1.33291	0	0	155.991	2	12.3941	0.00150602	1.11787	1.18576	ILMN_25666	SEMA3B	3	Homo sapiens sema domain, immunoglobulin domain (Ig), short basic domain, secreted, (semaphorin) 3B (SEMA3B), transcript variant 2, mRNA.	SEMAA; SemA; FLJ34863; SEMA5; semaV; LUCA-1	NM_001005914.1
ILMN_1653504	EDG1	9.65881	2	6.89319	0.0813253	0	7.7083	2	2.58335	0.114458	-0.000291313	0.798059	ILMN_138993	EDG1	1	Homo sapiens endothelial differentiation, sphingolipid G-protein-coupled receptor, 1 (EDG1), mRNA.	CHEDG1; S1PR1; D1S3362; ECGF1; EDG-1	NM_001400.3
ILMN_1653524	SIKE	25.7603	2	0.75073	0.0225904	0	37.9348	2	13.69	0.0180723	0.000291313	1.47261	ILMN_30142	SIKE	1	Homo sapiens suppressor of IKK epsilon (SIKE), mRNA.	RP5-1000E10.4; FLJ21168; DKFZp686A0768	NM_025073.1
ILMN_1653529	TEX10	1037.21	2	20.9382	0	0	1134.59	2	43.8675	0	0.123402	1.09389	ILMN_25785	TEX10	9	Homo sapiens testis expressed 10 (TEX10), mRNA.	RP11-208F1.2; FLJ20287; bA208F1.2	NM_017746.2
ILMN_1653553	C14orf80	569.586	2	11.5889	0	0	329.565	2	1.67105	0	-46.8952	0.578605	ILMN_22897	C14ORF80	14	Homo sapiens chromosome 14 open reading frame 80 (C14orf80), mRNA.	MGC16771	NM_173608.1
ILMN_1653578	XYLT1	-4.45054	2	6.85272	0.637048	0	0.712484	2	0.702826	0.286145	0.000291313	-0.160089	ILMN_22131	XYLT1	16	Homo sapiens xylosyltransferase I (XYLT1), mRNA.	XT1; XT-I	NM_022166.2
ILMN_1653591	TRIM40	-1.22573	2	4.47801	0.411145	0	-3.84016	2	1.85546	0.605422	-0.000291313	3.13296	ILMN_2471	TRIM40	6	Homo sapiens tripartite motif-containing 40 (TRIM40), mRNA.	RNF35	NM_138700.2
ILMN_1653599	ATP5D	9479.81	2	457.918	0	0	6413.72	2	482.955	0	-27.7054	0.676567	ILMN_6639	ATP5D	19	Homo sapiens ATP synthase, H+ transporting, mitochondrial F1 complex, delta subunit (ATP5D), nuclear gene encoding mitochondrial protein, transcript variant 1, mRNA.		NM_001687.4
ILMN_1653612	KCTD9	432.664	2	41.5113	0	0	492.505	2	8.60278	0	1.87238	1.13831	ILMN_1204	KCTD9	8	Homo sapiens potassium channel tetramerisation domain containing 9 (KCTD9), mRNA.	FLJ20038	NM_017634.2
ILMN_1653613	PIGO	160.428	2	27.9944	0	0	161.075	2	26.9646	0	0.000291313	1.00403	ILMN_9448	PIGO	9	Homo sapiens phosphatidylinositol glycan anchor biosynthesis, class O (PIGO), transcript variant 2, mRNA.	RP11-182N22.4; DKFZp434M222; FLJ00135; MGC3079; MGC20536	NM_152850.2
ILMN_1653646	UBL7	88.9224	2	11.2071	0.00451807	0	76.5341	2	18.2523	0.0060241	-0.000291313	0.860683	ILMN_17890	UBL7	15	Homo sapiens ubiquitin-like 7 (bone marrow stromal cell-derived) (UBL7), transcript variant 1, mRNA.	TCBA1; MGC14421; BMSC-UbP	NM_032907.3
ILMN_1653648	GPR63	93.3107	2	20.5003	0.00451807	0	64.2505	2	8.72968	0.00903614	-1.9481	0.688565	ILMN_25570	GPR63	6	Homo sapiens G protein-coupled receptor 63 (GPR63), mRNA.	PSP24B; PSP24(beta)	NM_030784.1
ILMN_1653652	PTPRC	-2.32575	2	0.857357	0.489458	0	-5.49074	2	4.73343	0.730422	-0.000291313	2.36085	ILMN_3782	PTPRC	1	Homo sapiens protein tyrosine phosphatase, receptor type, C (PTPRC), transcript variant 4, mRNA.	LY5; CD45; T200; LCA; B220; GP180	NM_080923.2
ILMN_1653666	KLHL7	20.6788	2	2.34903	0.0301205	0	17.4851	2	3.84983	0.0391566	-0.000291313	0.845554	ILMN_21425	KLHL7	7	Homo sapiens kelch-like 7 (Drosophila) (KLHL7), transcript variant 2, mRNA.	KLHL6; SBBI26	NM_018846.2
ILMN_1653670	CUL3	5.67716	2	2.21912	0.141566	0	10.9076	2	4.628	0.0798193	0.000291313	1.9213	ILMN_7911	CUL3	2	Homo sapiens cullin 3 (CUL3), mRNA.		NM_003590.2
ILMN_1653687	GALNT9	2.78683	2	5.35149	0.216867	0	6.1541	2	1.43917	0.135542	0.000291313	2.20828	ILMN_16714	GALNT9	12	Homo sapiens UDP-N-acetyl-alpha-D-galactosamine:polypeptide N-acetylgalactosaminyltransferase 9 (GalNAc-T9) (GALNT9), mRNA.	GALNAC-T9	NM_021808.2
ILMN_1653708	CORO1B	1448.26	2	23.2996	0	0	2050.94	2	28.1926	0	34.6412	1.41614	ILMN_26478	CORO1B	11	Homo sapiens coronin, actin binding protein, 1B (CORO1B), transcript variant 2, mRNA.	CORONIN-2; DKFZP762I166	NM_001018070.1
ILMN_1653709	TIMM9	524.48	2	65.4436	0	0	483.521	2	9.2782	0	-0.000291313	0.921906	ILMN_9968	TIMM9	14	Homo sapiens translocase of inner mitochondrial membrane 9 homolog (yeast) (TIMM9), nuclear gene encoding mitochondrial protein, mRNA.	TIM9; TIM9A	NM_012460.2
ILMN_1653711	FZD2	480.721	2	41.1686	0	0	355.501	2	29.7949	0	-12.9523	0.739516	ILMN_12499	FZD2	17	Homo sapiens frizzled homolog 2 (Drosophila) (FZD2), mRNA.		NM_001466.2
ILMN_1653712	UAP1L1	249.272	2	2.73435	0	0	290.86	2	11.2826	0	2.38756	1.16684	ILMN_20654	UAP1L1	9	Homo sapiens UDP-N-acteylglucosamine pyrophosphorylase 1-like 1 (UAP1L1), mRNA.	RP11-229P13.18	NM_207309.1
ILMN_1653718	ZFAND2B	454.039	2	31.388	0	0	336.94	2	9.58694	0	-13.8429	0.742094	ILMN_15433	ZFAND2B	2	Homo sapiens zinc finger, AN1-type domain 2B (ZFAND2B), mRNA.		NM_138802.1
ILMN_1653719	ITGBL1	7.6445	2	0.507332	0.112952	0	8.97893	2	12.0464	0.0933735	0.000291313	1.17456	ILMN_22983	ITGBL1	13	Homo sapiens integrin, beta-like 1 (with EGF-like repeat domains) (ITGBL1), mRNA.	OSCP; TIED	NM_004791.1
ILMN_1653728	ERBB4	27.7157	2	3.06082	0.0195783	0	22.2996	2	4.52287	0.0286145	-0.000291313	0.804583	ILMN_11180	ERBB4	2	Homo sapiens v-erb-a erythroblastic leukemia viral oncogene homolog 4 (avian) (ERBB4), mRNA.	HER4; MGC138404	NM_005235.1
ILMN_1653730	OXCT2	9.05843	2	0.615125	0.0978916	0	1.76609	2	1.31045	0.243976	-0.000291313	0.194966	ILMN_24641	OXCT2	1	Homo sapiens 3-oxoacid CoA transferase 2 (OXCT2), mRNA.	FKSG25; SCOT-T; FLJ00030	NM_022120.1
ILMN_1653748	CST11	-7.61526	2	1.42865	0.902108	0	-7.2972	2	4.07397	0.861446	0.000291313	0.958234	ILMN_19295	CST11	20	Homo sapiens cystatin 11 (CST11), transcript variant 1, mRNA.	SC13; dJ322G13.6; CST8L	NM_130794.1
ILMN_1653750	SOX10	-0.569084	2	5.14226	0.376506	0	-0.934937	2	3.29236	0.375	-0.000291313	1.64288	ILMN_13184	SOX10	22	Homo sapiens SRY (sex determining region Y)-box 10 (SOX10), mRNA.	WS4; DOM; WS2E; MGC15649	NM_006941.3
ILMN_1653762	NRSN1	-2.25981	2	0.795676	0.480422	0	-4.48349	2	2.18631	0.665663	-0.000291313	1.98401	ILMN_9198	NRSN1	6	Homo sapiens neurensin 1 (NRSN1), mRNA.	p24; VMP	NM_080723.3
ILMN_1653766	CCL24	-8.6535	2	0.590818	0.933735	0	-7.7514	2	1.06684	0.891566	0.000291313	0.895753	ILMN_17285	CCL24	7	Homo sapiens chemokine (C-C motif) ligand 24 (CCL24), mRNA.	Ckb-6; SCYA24; MPIF2; MPIF-2	NM_002991.2
ILMN_1653771	WDR63	48.5687	2	4.25852	0.0105422	0	90.2849	2	23.1037	0.00451807	5.20826	1.85891	ILMN_5848	WDR63	1	Homo sapiens WD repeat domain 63 (WDR63), mRNA.	RP11-507C22.2; FLJ30067; NYD-SP29	NM_145172.2
ILMN_1653783	MLC1	-0.784471	2	1.83614	0.388554	0	-6.97373	2	3.9253	0.834337	-0.000291313	8.88973	ILMN_25094	MLC1	22	Homo sapiens megalencephalic leukoencephalopathy with subcortical cysts 1 (MLC1), transcript variant 2, mRNA.	VL; MLC; KIAA0027; LVM	NM_139202.2
ILMN_1653788	RNF208	8.06799	2	1.42582	0.108434	0	3.29363	2	4.17633	0.185241	-0.000291313	0.408235	ILMN_25806	RNF208	9	Homo sapiens ring finger protein 208 (RNF208), mRNA.	MGC88636; DKFZp761H1710	NM_031297.3
ILMN_1653793	PDPK1	338.055	2	109.03	0	0	510.536	2	24.6979	0	6.51537	1.51021	ILMN_27765	PDPK1	16	Homo sapiens 3-phosphoinositide dependent protein kinase-1 (PDPK1), transcript variant 1, mRNA.	MGC20087; MGC35290; PDK1; PRO0461; PkB-like; PkB-like 1	NM_002613.3
ILMN_1653821	ADRA1A	-3.2465	2	4.14788	0.560241	0	-3.51785	2	3.93436	0.558735	-0.000291313	1.08358	ILMN_18033	ADRA1A	8	Homo sapiens adrenergic, alpha-1A-, receptor (ADRA1A), transcript variant 3, mRNA.	ADRA1C; ALPHA1AAR; ADRA1L1	NM_033302.1
ILMN_1653824	LAMC2	72.3587	2	26.4026	0.00451807	0	139.162	2	1.27583	0.00150602	12.9627	1.92322	ILMN_28991	LAMC2	1	Homo sapiens laminin, gamma 2 (LAMC2), transcript variant 1, mRNA.	EBR2; MGC141938; MGC138491; LAMB2T; LAMNB2; BM600; EBR2A; B2T	NM_005562.1
ILMN_1653826	FGF13	-2.25974	2	1.28814	0.478916	0	-1.86143	2	0.873228	0.430723	0.000291313	0.823735	ILMN_6609	FGF13	X	Homo sapiens fibroblast growth factor 13 (FGF13), transcript variant 1B, mRNA.	FHF2; FGF2	NM_033642.1
ILMN_1653828	CHFR	7.57019	2	5.44169	0.114458	0	11.8523	2	2.78105	0.0677711	0.000291313	1.56566	ILMN_26892	CHFR	12	Homo sapiens checkpoint with forkhead and ring finger domains (CHFR), mRNA.	RNF196; FLJ10796; FLJ33629; RNF116	NM_018223.1
ILMN_1653834	OGFOD1	16.1069	2	3.92424	0.0466867	0	25.912	2	4.52065	0.0271084	0.000291313	1.60875	ILMN_16561	OGFOD1	16	Homo sapiens 2-oxoglutarate and iron-dependent oxygenase domain containing 1 (OGFOD1), mRNA.	KIAA1612; TPA1; FLJ10826	NM_018233.3
ILMN_1653836	C11orf41	279.315	2	1.06358	0	0	201.679	2	6.85049	0	-13.0541	0.722048	ILMN_27502	C11ORF41	11	Homo sapiens chromosome 11 open reading frame 41 (C11orf41), mRNA.	FLJ36988; MGC34830; G2; C11orf69	NM_012194.1
ILMN_1653856	STS-1	796.535	2	35.6468	0	0	797.179	2	30.9861	0	0.000291313	1.00081	ILMN_20786	STS-1	11	Homo sapiens Cbl-interacting protein Sts-1 (STS-1), mRNA.	MGC15437; KIAA1959; p70	NM_032873.3
ILMN_1653861	SCMH1	158.487	2	25.9322	0	0	155.396	2	8.36698	0.00150602	-0.000291313	0.980496	ILMN_5778	SCMH1	1	Homo sapiens sex comb on midleg homolog 1 (Drosophila) (SCMH1), transcript variant 1, mRNA.	Scml3	NM_001031694.1
ILMN_1653867	ZNF483	1.44449	2	3.84948	0.256024	0	4.0068	2	3.16585	0.170181	0.000291313	2.77386	ILMN_2224	ZNF483	9	Homo sapiens zinc finger protein 483 (ZNF483), transcript variant 2, mRNA.	ZKSCAN16	NM_001007169.1
ILMN_1653871	NAMPT	257.893	2	6.89473	0	0	395.038	2	44.3698	0	21.0037	1.53179	ILMN_21166	NAMPT	7	Homo sapiens nicotinamide phosphoribosyltransferase (NAMPT), mRNA.	DKFZP666B131; PBEF; 1110035O14Rik; NAMPT; MGC117256	NM_005746.2
ILMN_1653878	CACNB2	29.5795	2	1.04996	0.0195783	0	19.2358	2	10.6529	0.0316265	-0.000291313	0.650308	ILMN_2192	CACNB2	10	Homo sapiens calcium channel, voltage-dependent, beta 2 subunit (CACNB2), transcript variant 4, mRNA.	CACNLB2; MYSB; FLJ23743	NM_201597.2
ILMN_1653896	ATRIP	136.474	2	11.4705	0	0	113.533	2	7.96195	0.00301205	-0.957431	0.831903	ILMN_3211	ATRIP	3	Homo sapiens ATR interacting protein (ATRIP), transcript variant 2, mRNA.	MGC20625; ATRIP; DKFZp762J2115; DRN3; FLJ12343; MGC21482; DKFZp434J0310; MGC26740; AGS1	NM_032166.2
ILMN_1653940	USP2	16.2535	2	2.50734	0.0466867	0	14.4824	2	2.66817	0.0512048	-0.000291313	0.891034	ILMN_4859	USP2	11	Homo sapiens ubiquitin specific peptidase 2 (USP2), transcript variant 1, mRNA.	USP9; UBP41	NM_004205.3
ILMN_1653965	ITGB4	9.04511	2	0.726409	0.0978916	0	6.19822	2	0.726433	0.135542	-0.000291313	0.685256	ILMN_26306	ITGB4	17	Homo sapiens integrin, beta 4 (ITGB4), transcript variant 1, mRNA.	CD104	NM_000213.3
ILMN_1653980	METTL8	13.5218	2	1.17338	0.0557229	0	13.0051	2	2.79733	0.0572289	-0.000291313	0.961792	ILMN_8706	METTL8	2	Homo sapiens methyltransferase like 8 (METTL8), mRNA.	FLJ42098; TIP; FLJ13984	NM_024770.2
ILMN_1654001	SMC6	197.233	2	15.9717	0	0	171.005	2	25.9993	0	-0.000291313	0.867016	ILMN_20314	SMC6	2	Homo sapiens structural maintenance of chromosomes 6 (SMC6), mRNA.	FLJ22116; SMC6L1; FLJ35534	NM_024624.4
ILMN_1654010	AGPAT3	75.9281	2	4.40781	0.00451807	0	96.7595	2	8.37082	0.00301205	1.35106	1.27436	ILMN_138486	AGPAT3	21	Homo sapiens 1-acylglycerol-3-phosphate O-acyltransferase 3 (AGPAT3), mRNA.	MGC4604; LPAAT-GAMMA1	NM_020132.3
ILMN_1654013	C17orf28	149.207	2	23.504	0	0	197.635	2	5.82267	0	6.27792	1.32457	ILMN_5120	C17ORF28	17	Homo sapiens chromosome 17 open reading frame 28 (C17orf28), mRNA.	FLJ43526; DMC1	NM_030630.1
ILMN_1654016	MRLC2	12686.5	2	262.548	0	0	13778	2	684.253	0	0.000291313	1.08603	ILMN_23774	MRLC2	18	Homo sapiens myosin regulatory light chain MRLC2 (MRLC2), mRNA.	MLC-B	NM_033546.2
ILMN_1654031	TPTE2	-5.0985	2	5.8866	0.728916	0	-6.70366	2	1.26357	0.817771	-0.000291313	1.31483	ILMN_25511	TPTE2	13	Homo sapiens transmembrane phosphoinositide 3-phosphatase and tensin homolog 2 (TPTE2), transcript variant 3, mRNA.	MGC149231; TPIP	NM_199254.1
ILMN_1654032	ZER1	116.915	2	10.436	0.00301205	0	139.2	2	1.41918	0.00150602	0.941319	1.19061	ILMN_20738	ZER1	9	Homo sapiens zer-1 homolog (C. elegans) (ZER1), mRNA.	ZYG11BL; C9orf60; ZYG; Hzyg; RP11-545E17.4	NM_006336.2
ILMN_1654060	MKNK2	305.067	2	49.1402	0	0	407.245	2	32.8085	0	8.39173	1.33494	ILMN_11303	MKNK2	19	Homo sapiens MAP kinase interacting serine/threonine kinase 2 (MKNK2), transcript variant 2, mRNA.	GPRK7; MNK2	NM_199054.2
ILMN_1654065	ATOH8	-1.16797	2	3.42342	0.411145	0	1.69388	2	5.25922	0.245482	0.000291313	-1.45028	ILMN_19598	ATOH8	2	Homo sapiens atonal homolog 8 (Drosophila) (ATOH8), mRNA.	HATH6; FLJ14708; FLJ38730	NM_032827.4
ILMN_1654068	NUDT1	96.3951	2	3.008	0.00301205	0	46.0768	2	5.95181	0.0150602	-16.966	0.478	ILMN_2361	NUDT1	7	Homo sapiens nudix (nucleoside diphosphate linked moiety X)-type motif 1 (NUDT1), transcript variant 4B, mRNA.	MTH1	NM_198954.1
ILMN_1654072	CX3CL1	-1.63478	2	5.23543	0.444277	0	-5.21629	2	0.735177	0.713855	-0.000291313	3.19083	ILMN_9636	CX3CL1	16	Homo sapiens chemokine (C-X3-C motif) ligand 1 (CX3CL1), mRNA.	neurotactin; NTN; SCYD1; C3Xkine; CXC3C; CXC3; NTT; fractalkine; ABCD-3	NM_002996.3
ILMN_1654074	ITGA3	9.65011	2	5.9819	0.0888554	0	2.08763	2	1.99233	0.224398	-0.000291313	0.216332	ILMN_11442	ITGA3	17	Homo sapiens integrin, alpha 3 (antigen CD49C, alpha 3 subunit of VLA-3 receptor) (ITGA3), transcript variant a, mRNA.	GAP-B3; FLJ34704; VLA3a; VL3A; MSK18; VCA-2; FLJ34631; GAPB3; CD49C	NM_002204.1
ILMN_1654099	LRIG2	118.308	2	6.33349	0.00150602	0	138.823	2	0.431925	0.00150602	0.480005	1.17341	ILMN_7215	LRIG2	1	Homo sapiens leucine-rich repeats and immunoglobulin-like domains 2 (LRIG2), mRNA.	KIAA0806; DKFZp451C181	NM_014813.1
ILMN_1654109	EGFLAM	0.63396	2	2.22294	0.299699	0	-0.902593	2	4.06024	0.370482	-0.000291313	-1.42374	ILMN_21200	EGFLAM	5	Homo sapiens EGF-like, fibronectin type III and laminin G domains (EGFLAM), transcript variant 4, mRNA.	AGRINL; AGRNL; FLJ39155	NM_182801.1
ILMN_1654112	PARD6A	267.94	2	62.2345	0	0	231.343	2	1.42295	0	-0.000291313	0.863414	ILMN_138264	PARD6A	16	Homo sapiens par-6 partitioning defective 6 homolog alpha (C. elegans) (PARD6A), transcript variant 2, mRNA.	TAX40; PAR6C; TIP-40; PAR6alpha; PAR-6A; PAR6	NM_001037281.1
ILMN_1654118	BCL2L1	1867.17	2	90.2492	0	0	1512.04	2	169.519	0	-4.96244	0.8098	ILMN_12148	BCL2L1	20	Homo sapiens BCL2-like 1 (BCL2L1), nuclear gene encoding mitochondrial protein, transcript variant 1, mRNA.	DKFZp781P2092; BCL-XL/S; bcl-xL; BCLX; Bcl-X; bcl-xS; BCL2L	NM_138578.1
ILMN_1654141	ZDHHC20	66.9055	2	10.9549	0.0060241	0	49.7427	2	5.33652	0.0150602	-0.38788	0.743477	ILMN_15011	ZDHHC20	13	Homo sapiens zinc finger, DHHC-type containing 20 (ZDHHC20), mRNA.	MGC126005; FLJ25952	NM_153251.2
ILMN_1654151	COX6C	17324.5	2	1769.33	0	0	17137.8	2	968.415	0	-0.000291313	0.989227	ILMN_6419	COX6C	8	Homo sapiens cytochrome c oxidase subunit VIc (COX6C), mRNA.		NM_004374.2
ILMN_1654153	BTBD11	-0.106568	2	0.417593	0.338855	0	-2.76182	2	0.937852	0.490964	-0.000291313	25.916	ILMN_506	BTBD11	12	Homo sapiens BTB (POZ) domain containing 11 (BTBD11), transcript variant 1, mRNA.	FLJ42845; FLJ33957	NM_152322.2
ILMN_1654195	GCC2	-9.75515	2	1.98039	0.975904	0	-2.14117	2	2.18529	0.445783	0.000291313	0.219491	ILMN_11557	GCC2	2	Homo sapiens GRIP and coiled-coil domain containing 2 (GCC2), transcript variant 1, mRNA.	KIAA0336; GCC185	NM_181453.2
ILMN_1654204	DNAJC5B	-13.1204	2	1.85735	0.998494	0	-9.24142	2	0.951147	0.942771	0.000291313	0.704355	ILMN_138989	DNAJC5B	8	Homo sapiens DnaJ (Hsp40) homolog, subfamily C, member 5 beta (DNAJC5B), mRNA.	MGC26226; CSP-beta	NM_033105.3
ILMN_1654210	CD1C	0.782104	2	0.0276077	0.292169	0	5.94081	2	3.17981	0.14006	0.000291313	7.59593	ILMN_25152	CD1C	1	Homo sapiens CD1c molecule (CD1C), mRNA.	CD1; R7; CD1A	NM_001765.2
ILMN_1654212	DOK7	38.7864	2	4.54619	0.0150602	0	36.5131	2	6.38198	0.0195783	-0.000291313	0.941389	ILMN_21479	DOK7	4	Homo sapiens docking protein 7 (DOK7), mRNA.	FLJ90556; C4orf25; FLJ33718; FLJ39137; Dok-7	NM_173660.3
ILMN_1654217	MPP2	115.728	2	13.9054	0.00301205	0	98.472	2	8.21152	0.00301205	-0.000291313	0.850891	ILMN_8793	MPP2	17	Homo sapiens membrane protein, palmitoylated 2 (MAGUK p55 subfamily member 2) (MPP2), mRNA.	DKFZp686J2189; DLG2; DKFZp686A06252; DKFZp761D0712	NM_005374.3
ILMN_1654228	PCDHGA3	-7.01461	2	1.70655	0.849398	0	-3.0318	2	0.33659	0.509036	0.000291313	0.432213	ILMN_16839	PCDHGA3	5	Homo sapiens protocadherin gamma subfamily A, 3 (PCDHGA3), transcript variant 2, mRNA.	PCDH-GAMMA-A3	NM_032011.1
ILMN_1654246	SIRT6	31.5455	2	9.40416	0.0180723	0	31.2931	2	0.507599	0.0210843	-0.000291313	0.991998	ILMN_1560	SIRT6	19	Homo sapiens sirtuin (silent mating type information regulation 2 homolog) 6 (S. cerevisiae) (SIRT6), mRNA.	SIR2L6	NM_016539.1
ILMN_1654261	TRPV1	3.96538	2	1.77017	0.183735	0	-3.24954	2	6.23495	0.528614	-0.000291313	-0.819476	ILMN_18183	TRPV1	17	Homo sapiens transient receptor potential cation channel, subfamily V, member 1 (TRPV1), transcript variant 2, mRNA.	VR1; DKFZp434K0220	NM_018727.5
ILMN_1654287	ADCY9	78.9171	2	10.5253	0.00451807	0	88.7542	2	2.22575	0.00451807	0.000291313	1.12465	ILMN_19769	ADCY9	16	Homo sapiens adenylate cyclase 9 (ADCY9), mRNA.		NM_001116.2
ILMN_1654289	ELK1	1320.12	2	54.7806	0	0	1168.07	2	18.455	0	-1.55402	0.88482	ILMN_14942	ELK1	X	Homo sapiens ELK1, member of ETS oncogene family (ELK1), mRNA.		NM_005229.2
ILMN_1654318	PTPN23	82.2182	2	6.14797	0.00451807	0	82.2788	2	21.638	0.0060241	0.000291313	1.00074	ILMN_1812	PTPN23	3	Homo sapiens protein tyrosine phosphatase, non-receptor type 23 (PTPN23), mRNA.	HDPTP; KIAA1471; PTP-TD14; DKFZP564F0923; HD-PTP	NM_015466.1
ILMN_1654319	HAPLN3	92.247	2	5.51862	0.00451807	0	33.0209	2	2.24808	0.0210843	-25.8928	0.357961	ILMN_19816	HAPLN3	15	Homo sapiens hyaluronan and proteoglycan link protein 3 (HAPLN3), mRNA.	HsT19883; EXLD1	NM_178232.2
ILMN_1654322	ATP1B3	654.692	2	130.038	0	0	606.123	2	18.1746	0	-0.000291313	0.925814	ILMN_3785	ATP1B3	3	Homo sapiens ATPase, Na+/K+ transporting, beta 3 polypeptide (ATP1B3), mRNA. XM_945518	ATPB-3; CD298; FLJ29027	NM_001679.2
ILMN_1654323	UBE3A	6.90958	2	0.786682	0.123494	0	11.1315	2	0.416743	0.0753012	0.000291313	1.61103	ILMN_1885	UBE3A	15	Homo sapiens ubiquitin protein ligase E3A (human papilloma virus E6-associated protein, Angelman syndrome) (UBE3A), transcript variant 3, mRNA.	EPVE6AP; AS; FLJ26981; ANCR; HPVE6A; E6-AP	NM_130839.1
ILMN_1654324	HEYL	2.56768	2	4.36224	0.228916	0	-2.20599	2	2.38743	0.447289	-0.000291313	-0.859138	ILMN_10547	HEYL	1	Homo sapiens hairy/enhancer-of-split related with YRPW motif-like (HEYL), mRNA.	MGC12623; HRT3	NM_014571.3
ILMN_1654331	HOXB4	40.8254	2	4.0674	0.0135542	0	37.7247	2	6.79039	0.0180723	-0.000291313	0.924048	ILMN_138565	HOXB4	17	Homo sapiens homeo box B4 (HOXB4), mRNA.	HOX2; HOX-2.6; HOX2F	NM_024015.3
ILMN_1654357	ZNF24	95.4336	2	4.00841	0.00451807	0	139.179	2	15.3808	0.00150602	8.22389	1.45839	ILMN_26605	ZNF24	18	Homo sapiens zinc finger protein 24 (ZNF24), mRNA.	KOX17; ZSCAN3; RSG-A; ZNF191; Zfp191	NM_006965.1
ILMN_1654365	LOC440742	2.14485	2	2.07028	0.240964	0	3.29909	2	1.77806	0.186747	0.000291313	1.53815	ILMN_20076	LOC440742	1	Homo sapiens hypothetical gene supported by AK124614 (LOC440742), mRNA.		NM_001013710.1
ILMN_1654370	TESK2	151.105	2	21.2496	0	0	184.082	2	11.2615	0	2.36905	1.21824	ILMN_20025	TESK2	1	Homo sapiens testis-specific kinase 2 (TESK2), mRNA.		NM_007170.2
ILMN_1654385	ASB13	159.29	2	3.74941	0	0	118.296	2	8.58182	0.00301205	-6.23778	0.742644	ILMN_16322	ASB13	10	Homo sapiens ankyrin repeat and SOCS box-containing 13 (ASB13), mRNA.	FLJ13134; MGC19879	NM_024701.2
ILMN_1654386	LOC283551	-5.51351	2	0.546819	0.746988	0	-2.51153	2	4.66217	0.47741	0.000291313	0.455523	ILMN_3744	LOC283551	14	Homo sapiens hypothetical protein LOC283551 (LOC283551), mRNA.	MGC149108	NM_001012706.1
ILMN_1654392	KIAA0323	260.797	2	75.474	0	0	332.035	2	24.1413	0	0.945828	1.27316	ILMN_24804	KIAA0323	14	Homo sapiens KIAA0323 (KIAA0323), mRNA.		NM_015299.2
ILMN_1654398	RGL1	215.465	2	15.6068	0	0	273.444	2	24.4185	0	6.27569	1.26909	ILMN_27201	RGL1	1	Homo sapiens ral guanine nucleotide dissociation stimulator-like 1 (RGL1), mRNA.	RGL; KIAA0959	NM_015149.3
ILMN_1654408	TRAF7	11.5307	2	12.0472	0.0662651	0	4.31275	2	1.28312	0.164157	-0.000291313	0.374022	ILMN_16616	TRAF7	16	Homo sapiens TNF receptor-associated factor 7 (TRAF7), mRNA.	MGC7807; RNF119; RFWD1; DKFZp586I021	NM_032271.2
ILMN_1654411	CCL18	5.36873	2	1.65125	0.146084	0	9.3994	2	4.10203	0.0918675	0.000291313	1.75077	ILMN_6746	CCL18	17	Homo sapiens chemokine (C-C motif) ligand 18 (pulmonary and activation-regulated) (CCL18), mRNA.	AMAC-1; CKb7; PARC; DCCK1; AMAC1; SCYA18; MIP-4; DC-CK1	NM_002988.2
ILMN_1654414	ACSL3	25.6447	2	7.81663	0.0225904	0	61.1588	2	20.5541	0.00903614	3.90968	2.38485	ILMN_416	ACSL3	2	Homo sapiens acyl-CoA synthetase long-chain family member 3 (ACSL3), transcript variant 1, mRNA.	PRO2194; FACL3; ACS3	NM_004457.3
ILMN_1654415	PTF1A	-7.49737	2	1.3188	0.887048	0	-6.16663	2	0.374208	0.78012	0.000291313	0.822506	ILMN_3477	PTF1A	10	Homo sapiens pancreas specific transcription factor, 1a (PTF1A), mRNA.	PTF1-p48	NM_178161.2
ILMN_1654422	ACTN2	48.9916	2	3.20519	0.0105422	0	49.0226	2	0.798462	0.0150602	0.000291313	1.00063	ILMN_798	ACTN2	1	Homo sapiens actinin, alpha 2 (ACTN2), mRNA.		NM_001103.1
ILMN_1654457	TXN2	54.5795	2	15.533	0.0105422	0	41.1009	2	6.41589	0.0165663	-0.000291313	0.753047	ILMN_12228	TXN2	22	Homo sapiens thioredoxin 2 (TXN2), nuclear gene encoding mitochondrial protein, mRNA.	MTRX; TRX2; MT-TRX	NM_012473.3
ILMN_1654459	SPANXN1	-7.74442	2	1.78771	0.903614	0	-4.7118	2	0.890481	0.674699	0.000291313	0.608413	ILMN_15038	SPANXN1	X	Homo sapiens SPANX family, member N1 (SPANXN1), mRNA.	SPANX-N1	NM_001009614.2
ILMN_1654466	PLAC4	3.0906	2	2.26155	0.209337	0	9.18801	2	8.71318	0.0918675	0.000291313	2.97289	ILMN_22443	PLAC4	21	Homo sapiens placenta-specific 4 (PLAC4), mRNA.	MGC126666; MGC126664	NM_182832.2
ILMN_1654468	ACRV1	14.4354	2	1.85181	0.0512048	0	9.46168	2	5.20963	0.0903614	-0.000291313	0.65545	ILMN_439	ACRV1	11	Homo sapiens acrosomal vesicle protein 1 (ACRV1), transcript variant 11, mRNA.	SP-10; D11S4365; SPACA2	NM_020115.3
ILMN_1654473	ZP1	3.7706	2	0.608315	0.189759	0	-1.08409	2	0.812422	0.379518	-0.000291313	-0.28751	ILMN_27976	ZP1	11	Homo sapiens zona pellucida glycoprotein 1 (sperm receptor) (ZP1), mRNA.	MGC87693	NM_207341.2
ILMN_1654479	GML	7.51086	2	1.88787	0.114458	0	7.17376	2	5.60169	0.120482	-0.000291313	0.955118	ILMN_4030	GML	8	Homo sapiens GPI anchored molecule like protein (GML), mRNA.	LY6DL	NM_002066.1
ILMN_1654488	UTX	230.155	2	15.7549	0	0	349.896	2	17.3187	0	34.3274	1.52026	ILMN_13785	UTX	X	Homo sapiens ubiquitously transcribed tetratricopeptide repeat, X chromosome (UTX), mRNA.	MGC141941; DKFZp686A03225; bA386N14.2	NM_021140.1
ILMN_1654504	CLEC7A	-7.95854	2	3.26849	0.917169	0	-4.67805	2	3.39189	0.670181	0.000291313	0.587802	ILMN_137594	CLEC7A	12	Homo sapiens C-type lectin domain family 7, member A (CLEC7A), transcript variant 6, mRNA.	BGR; DECTIN1; CLECSF12	NM_197954.2
ILMN_1654516	TMEM120A	327.096	2	51.0626	0	0	357.641	2	35.1133	0	0.000291313	1.09338	ILMN_9004	TMEM120A	7	Homo sapiens transmembrane protein 120A (TMEM120A), mRNA.	TMPIT	NM_031925.1
ILMN_1654534	NPSR1	4.25954	2	0.64463	0.179217	0	1.75648	2	0.412424	0.243976	-0.000291313	0.412363	ILMN_17592	NPSR1	7	Homo sapiens neuropeptide S receptor 1 (NPSR1), transcript variant 2, mRNA.	GPR154; PGR14; ASRT2; NPSR; VRR1; GPRA	NM_207173.1
ILMN_1654540	SEMA6D	1.13998	2	2.69674	0.275602	0	-4.71096	2	2.77019	0.676205	-0.000291313	-4.1325	ILMN_45218	SEMA6D	15	Homo sapiens sema domain, transmembrane domain (TM), and cytoplasmic domain, (semaphorin) 6D (SEMA6D), transcript variant 5, mRNA.	FLJ11598; KIAA1479	NM_153619.1
ILMN_1654541	ATP6V1G2	82.1744	2	22.4566	0.00451807	0	50.8744	2	4.17963	0.0150602	-2.35479	0.619103	ILMN_18630	ATP6V1G2	6	Homo sapiens ATPase, H+ transporting, lysosomal 13kDa, V1 subunit G2 (ATP6V1G2), transcript variant 1, mRNA.	NG38; ATP6G2; VMA10; ATP6G	NM_130463.2
ILMN_1654542	C5orf21	657.498	2	19.6729	0	0	757.189	2	34.7581	0	3.02553	1.15162	ILMN_1337	C5ORF21	5	Homo sapiens chromosome 5 open reading frame 21 (C5orf21), mRNA.	DKFZP564D172	NM_032042.3
ILMN_1654543	MED6	2736.21	2	57.9982	0	0	2825.24	2	107.443	0	0.000291313	1.03254	ILMN_3684	MED6	14	Homo sapiens mediator complex subunit 6 (MED6), mRNA.	NY-REN-28	NM_005466.2
ILMN_1654545	CPSF1	813.024	2	166.108	0	0	642.357	2	44.5602	0	-1.73594	0.790084	ILMN_22094	CPSF1	8	Homo sapiens cleavage and polyadenylation specific factor 1, 160kDa (CPSF1), mRNA.	HSU37012; P/cl.18; CPSF160	NM_013291.2
ILMN_1654552	MRPS31	1076.32	2	86.6178	0	0	1136.94	2	70.6949	0	0.000291313	1.05633	ILMN_6293	MRPS31	13	Homo sapiens mitochondrial ribosomal protein S31 (MRPS31), nuclear gene encoding mitochondrial protein, mRNA.	MRP-S31; IMOGN38	NM_005830.2
ILMN_1654563	EFNB1	120.635	2	2.57344	0.00150602	0	155.327	2	7.99757	0.00150602	4.68308	1.28757	ILMN_9793	EFNB1	X	Homo sapiens ephrin-B1 (EFNB1), mRNA.	MGC8782; LERK2; CFNS; EFL3; CFND; EPLG2; Elk-L	NM_004429.3
ILMN_1654566	HSPA1L	37.2249	2	1.86249	0.0150602	0	52.7702	2	7.09489	0.0120482	0.265998	1.41761	ILMN_22496	HSPA1L	6	Homo sapiens heat shock 70kDa protein 1-like (HSPA1L), mRNA.	HSP70-HOM; hum70t	NM_005527.3
ILMN_1654570	TEKT1	9.93945	2	1.84652	0.0783133	0	11.6128	2	5.22189	0.0707831	0.000291313	1.16835	ILMN_28911	TEKT1	17	Homo sapiens tektin 1 (TEKT1), mRNA.		NM_053285.1
ILMN_1654571	FCHO1	17.7846	2	2.90559	0.0391566	0	12.0055	2	5.99023	0.0662651	-0.000291313	0.675049	ILMN_19679	FCHO1	19	Homo sapiens FCH domain only 1 (FCHO1), mRNA.	KIAA0290	NM_015122.1
ILMN_1654583	CHD1	853.02	2	27.8074	0	0	955.868	2	131.697	0	0.000291313	1.12057	ILMN_27142	CHD1	5	Homo sapiens chromodomain helicase DNA binding protein 1 (CHD1), mRNA.	DKFZp686E2337	NM_001270.2
ILMN_1654586	RASA3	76.7666	2	8.14414	0.00451807	0	74.7641	2	0.951512	0.0060241	-0.000291313	0.973914	ILMN_19501	RASA3	13	Homo sapiens RAS p21 protein activator 3 (RASA3), mRNA.	GAPIII; GAP1IP4BP; MGC47588; MGC46517	NM_007368.2
ILMN_1654606	ZDHHC22	20.1743	2	2.65274	0.0301205	0	20.8946	2	0.813713	0.0301205	0.000291313	1.03571	ILMN_17002	ZDHHC22	14	Homo sapiens zinc finger, DHHC-type containing 22 (ZDHHC22), mRNA.	C14orf59	NM_174976.2
ILMN_1654612	ZNF589	176.801	2	19.5166	0	0	127.742	2	4.72145	0.00150602	-8.68445	0.722514	ILMN_26968	ZNF589	3	Homo sapiens zinc finger protein 589 (ZNF589), mRNA.	SZF1	NM_016089.2
ILMN_1654613	THRA	12.6789	2	1.91542	0.060241	0	17.6663	2	3.4533	0.0391566	0.000291313	1.39336	ILMN_4776	THRA	17	Homo sapiens thyroid hormone receptor, alpha (erythroblastic leukemia viral (v-erb-a) oncogene homolog, avian) (THRA), transcript variant 1, mRNA.	NR1A1; THRA1; THRA2; ERB-T-1; ERBA; ERBA1; c-ERBA-1; AR7; MGC43240; MGC000261; EAR7	NM_199334.2
ILMN_1654629	TMEM175	219.387	2	36.3165	0	0	216.102	2	8.83987	0	-0.000291313	0.985025	ILMN_5253	TMEM175	4	Homo sapiens transmembrane protein 175 (TMEM175), mRNA.	MGC4618	NM_032326.2
ILMN_1654639	HERC6	550.593	2	0.170733	0	0	719.559	2	65.1387	0	11.2925	1.30688	ILMN_7535	HERC6	4	Homo sapiens hect domain and RLD 6 (HERC6), mRNA.	FLJ20637	NM_017912.3
ILMN_1654653	KLC1	475.042	2	6.60757	0	0	599.471	2	37.237	0	11.3057	1.26193	ILMN_22293	KLC1	14	Homo sapiens kinesin light chain 1 (KLC1), transcript variant 1, mRNA.	KNS2; KLC1; KLC; KNS2A; MGC15245	NM_005552.4
ILMN_1654671	SLMO1	89.3811	2	0.0225843	0.00451807	0	131.02	2	3.3313	0.00150602	9.71254	1.46586	ILMN_45032	SLMO1	18	Homo sapiens slowmo homolog 1 (Drosophila) (SLMO1), mRNA.	FLJ31484; MGC120170; HFL-EDDG1; DKFZp547K106; PRELID3A; C18orf43	NM_006553.2
ILMN_1654677	RAD9B	1.91229	2	1.78282	0.243976	0	-1.31072	2	0.188393	0.391566	-0.000291313	-0.685419	ILMN_22564	RAD9B	12	Homo sapiens RAD9 homolog B (S. cerevisiae) (RAD9B), mRNA.	MGC75426; FLJ40346	NM_152442.2
ILMN_1654685	MCTP1	75.5147	2	11.1852	0.00451807	0	172.516	2	23.5712	0	34.5085	2.28453	ILMN_2499	MCTP1	5	Homo sapiens multiple C2 domains, transmembrane 1 (MCTP1), transcript variant L, mRNA.	FLJ22344	NM_024717.3
ILMN_1654689	ZNF197	62.0659	2	11.0724	0.00903614	0	89.069	2	0.279859	0.00451807	3.46809	1.43507	ILMN_890	ZNF197	3	Homo sapiens zinc finger protein 197 (ZNF197), transcript variant 1, mRNA.	ZNF20; D3S1363E; VHLaK; P18; ZKSCAN9; ZNF166	NM_006991.3
ILMN_1654690	CECR5	3293.69	2	146.051	0	0	2525.07	2	42.033	0	-13.7173	0.76664	ILMN_742	CECR5	22	Homo sapiens cat eye syndrome chromosome region, candidate 5 (CECR5), transcript variant 2, mRNA.		NM_033070.2
ILMN_1654692	RALGPS2	-2.6722	2	2.5665	0.518072	0	0.101324	2	2.89277	0.319277	0.000291313	-0.0379178	ILMN_701	RALGPS2	1	Homo sapiens Ral GEF with PH domain and SH3 binding motif 2 (RALGPS2), transcript variant 1, mRNA.	KIAA0351; FLJ10244; FLJ25604; dJ595C2.1	NM_018037.1
ILMN_1654696	C15orf48	7.23211	2	2.11476	0.115964	0	26.7903	2	3.41231	0.0271084	2.17095	3.70436	ILMN_2226	C15ORF48	15	Homo sapiens chromosome 15 open reading frame 48 (C15orf48), transcript variant 2, mRNA.	FLJ22645; MGC32925; NMES1; FOAP-11	NM_032413.2
ILMN_1654697	ZNF280B	27.0459	2	10.0234	0.0225904	0	32.0679	2	0.421932	0.0210843	0.000291313	1.18568	ILMN_19056	ZNF280B	22	Homo sapiens zinc finger protein 280B (ZNF280B), mRNA.	5'OY11.1; ZNF279; D87009.C22.3; ZNF632	NM_080764.2
ILMN_1654703	GPR157	-4.82018	2	4.50595	0.683735	0	-5.51861	2	2.38753	0.731928	-0.000291313	1.1449	ILMN_22696	GPR157	1	Homo sapiens G protein-coupled receptor 157 (GPR157), mRNA.	FLJ12132	NM_024980.4
ILMN_1654722	MPV17L	40.7413	2	1.40501	0.0135542	0	41.1334	2	9.30003	0.0165663	0.000291313	1.00963	ILMN_16691	MPV17L	16	Homo sapiens MPV17 mitochondrial membrane protein-like (MPV17L), nuclear gene encoding mitochondrial protein, mRNA.	MLPH2; MLPH1; MGC70356; FLJ39599	NM_173803.2
ILMN_1654737	TRIM32	480.988	2	24.3472	0	0	501.213	2	8.65589	0	0.000291313	1.04205	ILMN_14426	TRIM32	9	Homo sapiens tripartite motif-containing 32 (TRIM32), transcript variant 1, mRNA.	LGMD2H; HT2A; TATIP; BBS11	NM_012210.3
ILMN_1654742	GJD4	-4.73766	2	2.00454	0.679217	0	-7.05952	2	1.41099	0.843373	-0.000291313	1.49009	ILMN_25175	GJD4	10	Homo sapiens gap junction protein, delta 4, 40.1kDa (GJD4), mRNA.	FLJ90023; RP11-425A6.2; CX40.1	NM_153368.2
ILMN_1654773	CASK	485.94	2	43.6667	0	0	493.549	2	20.9656	0	0.000291313	1.01566	ILMN_14654	CASK	X	Homo sapiens calcium/calmodulin-dependent serine protein kinase (MAGUK family) (CASK), mRNA.	LIN2	NM_003688.1
ILMN_1654778	LSP1	-4.56934	2	0.366148	0.671687	0	-3.16578	2	2.39295	0.52259	0.000291313	0.69283	ILMN_12132	LSP1	11	Homo sapiens lymphocyte-specific protein 1 (LSP1), transcript variant 2, mRNA.	WP34; pp52	NM_001013253.1
ILMN_1654786	TRIM6	-6.4762	2	4.17487	0.819277	0	-7.92433	2	0.618931	0.899096	-0.000291313	1.22361	ILMN_24297	TRIM6	11	Homo sapiens tripartite motif-containing 6 (TRIM6), transcript variant 2, mRNA.	RNF89	NM_058166.3
ILMN_1654792	C8orf15	13.2426	2	6.56981	0.060241	0	7.67762	2	8.03853	0.114458	-0.000291313	0.579768	ILMN_27394	C8ORF15		Homo sapiens chromosome 8 open reading frame 15 (C8orf15), mRNA.		NM_001033662.2
ILMN_1654823	MGC70863	65.144	2	4.56414	0.0060241	0	89.1596	2	5.08873	0.00451807	2.7239	1.36865	ILMN_10353	MGC70863	22	Homo sapiens similar to RPL23AP7 protein (MGC70863), transcript variant 2, mRNA.		NM_203302.2
ILMN_1654851	FAM134A	310.923	2	17.176	0	0	330.251	2	54.0012	0	0.000291313	1.06216	ILMN_20437	FAM134A	2	Homo sapiens family with sequence similarity 134, member A (FAM134A), mRNA.	MGC3035; C2orf17; DKFZp686C2379	NM_024293.3
ILMN_1654854	MURC	28.5076	2	0.799107	0.0195783	0	40.9049	2	7.67537	0.0165663	0.000291313	1.43488	ILMN_18803	MURC	9	Homo sapiens muscle-restricted coiled-coil protein (MURC), mRNA.		NM_001018116.1
ILMN_1654855	DCX	-8.83993	2	2.35959	0.942771	0	-3.64158	2	0.576748	0.573795	0.000291313	0.411947	ILMN_1140	DCX	X	Homo sapiens doublecortex; lissencephaly, X-linked (doublecortin) (DCX), transcript variant 1, mRNA.	DBCN; DC; LISX; SCLH; XLIS	NM_000555.2
ILMN_1654858	ZNF818	12.7357	2	2.25231	0.060241	0	10.9453	2	2.20568	0.0798193	-0.000291313	0.859417	ILMN_2217	ZNF818	19	Homo sapiens zinc finger protein 818 (ZNF818), mRNA.	FLJ46385	NM_001001675.1
ILMN_1654861	ACO2	442.279	2	100.46	0	0	529.286	2	13.5088	0	0.524743	1.19673	ILMN_23057	ACO2	22	Homo sapiens aconitase 2, mitochondrial (ACO2), nuclear gene encoding mitochondrial protein, mRNA.	MGC20605; ACONM; MGC33908	NM_001098.2
ILMN_1654864	C1orf58	34.8054	2	3.37707	0.0165663	0	65.3909	2	9.57584	0.00903614	5.86591	1.87876	ILMN_11942	C1ORF58	1	Homo sapiens chromosome 1 open reading frame 58 (C1orf58), mRNA.	FLJ32421; MGC142197; MGC142195; RP11-452F19.1; Brox	NM_144695.2
ILMN_1654866	RANBP2	106.067	2	2.42424	0.00301205	0	120.374	2	5.80079	0.00301205	0.000291313	1.13488	ILMN_25963	RANBP2	2	Homo sapiens RAN binding protein 2 (RANBP2), mRNA.	NUP358; TRP2; TRP1	NM_006267.4
ILMN_1654875	CLC	9.44488	2	3.01258	0.0903614	0	6.25957	2	0.337966	0.135542	-0.000291313	0.662747	ILMN_7433	CLC	19	Homo sapiens Charcot-Leyden crystal protein (CLC), mRNA.	LGALS10; LPPL_HUMAN; MGC149659	NM_001828.4
ILMN_1654890	LENG8	16.7793	2	12.2371	0.0421687	0	15.01	2	3.88309	0.0496988	-0.000291313	0.89455	ILMN_9235	LENG8	19	Homo sapiens leukocyte receptor cluster (LRC) member 8 (LENG8), mRNA.	pp13842; MGC40108; KIAA1932	NM_052925.1
ILMN_1654893	SCAMP2	79.4416	2	2.68987	0.00451807	0	67.3666	2	10.5431	0.0060241	-0.000291313	0.848002	ILMN_20277	SCAMP2	15	Homo sapiens secretory carrier membrane protein 2 (SCAMP2), mRNA.		NM_005697.3
ILMN_1654899	CT47.6	6.16977	2	6.22932	0.135542	0	-2.41098	2	0.386711	0.465361	-0.000291313	-0.390773	ILMN_45097	CT47.6	X	Homo sapiens cancer/testis CT47 family, member 6 (CT47.6), mRNA.		NM_001080141.1
ILMN_1654916	KIF7	34.7228	2	5.15538	0.0165663	0	32.0728	2	0.588024	0.0210843	-0.000291313	0.92368	ILMN_2591	KIF7	15	Homo sapiens kinesin family member 7 (KIF7), mRNA.	MGC120653; MGC138478; MGC138476; UNQ340	NM_198525.1
ILMN_1654920	HNRPH3	945.631	2	56.3056	0	0	756.043	2	12.4141	0	-8.71463	0.799512	ILMN_8162	HNRPH3	10	Homo sapiens heterogeneous nuclear ribonucleoprotein H3 (2H9) (HNRPH3), transcript variant 2H9, mRNA.	2H9; FLJ34092	NM_012207.1
ILMN_1654939	TMED2	4349.51	2	301.072	0	0	4037.7	2	154.614	0	-0.000291313	0.928311	ILMN_4842	TMED2	12	Homo sapiens transmembrane emp24 domain trafficking protein 2 (TMED2), mRNA.	FLJ21323; RNP24; P24A	NM_006815.3
ILMN_1654942	NFIC	2.19573	2	1.24059	0.237952	0	-1.98279	2	4.01107	0.438253	-0.000291313	-0.903022	ILMN_22526	NFIC	19	Homo sapiens nuclear factor I/C (CCAAT-binding transcription factor) (NFIC), transcript variant 1, mRNA.	CTF5; CTF; NF-I; NFI; MGC20153	NM_005597.2
ILMN_1654945	DNMT3A	-3.32383	2	7.15063	0.549699	0	4.93345	2	2.35426	0.158133	0.000291313	-1.48427	ILMN_29180	DNMT3A	2	Homo sapiens DNA (cytosine-5-)-methyltransferase 3 alpha (DNMT3A), transcript variant 2, mRNA.	DNMT3A2; M.HsaIIIA	NM_153759.2
ILMN_1654946	ZSCAN18	1688.81	2	207.525	0	0	2311.36	2	245.115	0	12.2654	1.36863	ILMN_16020	ZSCAN18	19	Homo sapiens zinc finger and SCAN domain containing 18 (ZSCAN18), mRNA.	ZNF447; DKFZp586B1122; FLJ44152; MGC2427; MGC8682; MGC4074; FLJ12895	NM_023926.3
ILMN_1654966	SCARA3	-7.08877	2	4.21805	0.865964	0	-3.50169	2	0.312215	0.558735	0.000291313	0.493977	ILMN_5608	SCARA3	8	Homo sapiens scavenger receptor class A, member 3 (SCARA3), transcript variant 2, mRNA.	APC7; MSLR1; MSRL1; CSR; CSR1	NM_182826.1
ILMN_1654979	EPHA6	-5.16984	2	0.779055	0.721386	0	-7.75234	2	2.30494	0.891566	-0.000291313	1.49953	ILMN_34830	EPHA6	3	Homo sapiens EPH receptor A6 (EPHA6), transcript variant 1, mRNA.	PRO57066; FLJ35246; DKFZp434C1418; EPA6	NM_001080448.2
ILMN_1654980	OTOA	-6.0821	2	3.35948	0.783133	0	-11.8428	2	0.869263	0.993976	-0.000291313	1.94716	ILMN_14487	OTOA	16	Homo sapiens otoancorin (OTOA), transcript variant 2, mRNA.	MGC157747; MGC39813; DFNB22; FLJ32773	NM_170664.1
ILMN_1654997	P2RX3	9.03771	2	5.27708	0.0963855	0	15.8012	2	4.15569	0.0451807	0.000291313	1.74837	ILMN_29681	P2RX3	11	Homo sapiens purinergic receptor P2X, ligand-gated ion channel, 3 (P2RX3), mRNA.	P2X3; MGC129956	NM_002559.2
ILMN_1654998	SMEK1	0.998777	2	7.09974	0.274096	0	0.427238	2	4.93032	0.299699	-0.000291313	0.427761	ILMN_18598	SMEK1	14	Homo sapiens SMEK homolog 1, suppressor of mek1 (Dictyostelium) (SMEK1), mRNA.	smk-1; MSTP033; KIAA2010; smk1; FLFL1	NM_032560.4
ILMN_1655039	SLC27A4	14.7194	2	6.86239	0.0512048	0	7.49627	2	3.60711	0.11747	-0.000291313	0.509277	ILMN_5215	SLC27A4	9	Homo sapiens solute carrier family 27 (fatty acid transporter), member 4 (SLC27A4), mRNA.	ACSVL4; FATP4	NM_005094.2
ILMN_1655046	NUTF2	169.542	2	12.8402	0	0	149.783	2	10.835	0.00150602	-0.000291313	0.883456	ILMN_29994	NUTF2	16	Homo sapiens nuclear transport factor 2 (NUTF2), mRNA.	PP15; NTF2	NM_005796.1
ILMN_1655052	TRNT1	24.7962	2	6.14416	0.0240964	0	9.50733	2	0.082972	0.0903614	-0.418616	0.383419	ILMN_16994	TRNT1	3	Homo sapiens tRNA nucleotidyl transferase, CCA-adding, 1 (TRNT1), transcript variant 1, mRNA.	CGI-47; MtCCA; CCA1	NM_016000.2
ILMN_1655068	TOM1L2	103.457	2	15.781	0.00301205	0	130.389	2	0.470161	0.00150602	2.10208	1.26032	ILMN_15017	TOM1L2	17	Homo sapiens target of myb1-like 2 (chicken) (TOM1L2), transcript variant 3, mRNA.	FLJ32746	NM_001082968.1
ILMN_1655077	PRDM1	129.369	2	8.12899	0	0	160.374	2	28.5614	0	0.657479	1.23966	ILMN_8384	PRDM1	6	Homo sapiens PR domain containing 1, with ZNF domain (PRDM1), transcript variant 1, mRNA.	MGC118922; BLIMP1; PRDI-BF1; MGC118925; MGC118924; MGC118923	NM_001198.2
ILMN_1655114	ABR	19.392	2	5.3821	0.0331325	0	14.1341	2	0.806213	0.0512048	-0.000291313	0.728862	ILMN_23502	ABR	17	Homo sapiens active BCR-related gene (ABR), transcript variant 2, mRNA.	MDB; FLJ45954	NM_001092.3
ILMN_1655117	WDR19	477.895	2	4.97352	0	0	739.256	2	65.0616	0	34.4491	1.5469	ILMN_11749	WDR19	4	Homo sapiens WD repeat domain 19 (WDR19), mRNA.	PWDMP; KIAA1638; FLJ23127; ORF26	NM_025132.3
ILMN_1655137	ZCCHC11	216.855	2	36.5547	0	0	250.746	2	4.17586	0	0.271966	1.15628	ILMN_4936	ZCCHC11	1	Homo sapiens zinc finger, CCHC domain containing 11 (ZCCHC11), transcript variant 3, mRNA.	PAPD3	NM_001009882.1
ILMN_1655154	PTBP1	8677.4	2	1391.75	0	0	7207.05	2	2.72868	0	-1.92928	0.830554	ILMN_20407	PTBP1	19	Homo sapiens polypyrimidine tract binding protein 1 (PTBP1), transcript variant 1, mRNA.	HNRNPI; PTB-T; PTB3; PTB-1; MGC8461; HNRPI; HNRNP-I; PTB2; MGC10830; PTB; PTB4; pPTB	NM_002819.3
ILMN_1655161	MORN1	2.5366	2	1.55786	0.225904	0	-2.86781	2	3.45232	0.5	-0.000291313	-1.13057	ILMN_13540	MORN1	1	Homo sapiens MORN repeat containing 1 (MORN1), mRNA.	FLJ13941; RP4-740C4.1	NM_024848.1
ILMN_1655163	STK24	4465.93	2	344.546	0	0	4566.4	2	50.7327	0	0.000291313	1.0225	ILMN_10104	STK24	13	Homo sapiens serine/threonine kinase 24 (STE20 homolog, yeast) (STK24), transcript variant 1, mRNA.	MST-3; STK3; STE20; MST3B; MST3	NM_003576.3
ILMN_1655165	RNF138	348.161	2	43.6449	0	0	271.173	2	34.8334	0	-4.50275	0.77887	ILMN_587	RNF138	18	Homo sapiens ring finger protein 138 (RNF138), transcript variant 1, mRNA.	STRIN; NARF; MGC8758; HSD-4	NM_016271.3
ILMN_1655167	ZNF502	129.76	2	7.9369	0	0	174.905	2	19.2747	0	6.15452	1.34791	ILMN_25786	ZNF502	3	Homo sapiens zinc finger protein 502 (ZNF502), mRNA.	FLJ14855; FLJ12515	NM_033210.3
ILMN_1655171	PCDHGC5	2.43395	2	5.63976	0.225904	0	-0.566473	2	4.69605	0.349398	-0.000291313	-0.232738	ILMN_27761	PCDHGC5	5	Homo sapiens protocadherin gamma subfamily C, 5 (PCDHGC5), transcript variant 2, mRNA.	MGC138288; PCDH-GAMMA-C5; MGC138286	NM_032407.1
ILMN_1655177	PIK4CA	1571.65	2	268.61	0	0	1599.63	2	57.1701	0	0.000291313	1.0178	ILMN_9670	PIK4CA	22	Homo sapiens phosphatidylinositol 4-kinase, catalytic, alpha polypeptide (PIK4CA), transcript variant 1, mRNA.	FLJ16556; pi4K230; PI4K-ALPHA	NM_002650.1
ILMN_1655191	CASZ1	311.856	2	37.9125	0	0	262.687	2	10.5961	0	-2.44396	0.842334	ILMN_27214	CASZ1	1	Homo sapiens castor zinc finger 1 (CASZ1), transcript variant 2, mRNA.	dJ734G22.1; FLJ12223; ZNF693; SRG; CST; cst; RP4-734G22.2; FLJ20321	NM_017766.3
ILMN_1655194	PHF17	76.5792	2	24.3749	0.00451807	0	73.7243	2	1.17201	0.0060241	-0.000291313	0.96272	ILMN_26400	PHF17	4	Homo sapiens PHD finger protein 17 (PHF17), transcript variant L, mRNA.	KIAA1807; FLJ22479; JADE1	NM_199320.2
ILMN_1655218	NFAT5	-4.41525	2	3.1775	0.64006	0	-5.24279	2	1.58337	0.715361	-0.000291313	1.18743	ILMN_9325	NFAT5	16	Homo sapiens nuclear factor of activated T-cells 5, tonicity-responsive (NFAT5), transcript variant 5, mRNA.	NFATL1; OREBP; TONEBP; NF-AT5; KIAA0827; NFATZ	NM_173215.1
ILMN_1655225	C19orf25	254.1	2	27.0071	0	0	203.356	2	19.2222	0	-4.36646	0.800301	ILMN_7396	C19ORF25	19	Homo sapiens chromosome 19 open reading frame 25 (C19orf25), mRNA.	FLJ36666	NM_152482.1
ILMN_1655229	SLC7A11	113.556	2	24.4877	0.00301205	0	287.999	2	12.1597	0	92.2715	2.53618	ILMN_138832	SLC7A11	4	Homo sapiens solute carrier family 7, (cationic amino acid transporter, y+ system) member 11 (SLC7A11), mRNA.	CCBR1; xCT	NM_014331.3
ILMN_1655241	PURG	2.08062	2	0.47255	0.24247	0	9.36167	2	5.74681	0.0918675	0.000291313	4.49946	ILMN_18071	PURG	8	Homo sapiens purine-rich element binding protein G (PURG), transcript variant A, mRNA.	MGC119274; PURG-A; PURG-B	NM_013357.2
ILMN_1655245	MDM1	41.3516	2	8.6882	0.0135542	0	47.9954	2	0.25455	0.0150602	0.000291313	1.16066	ILMN_2846	MDM1	12	Homo sapiens Mdm4, transformed 3T3 cell double minute 1, p53 binding protein (mouse) (MDM1), transcript variant 2, mRNA.		NM_020128.1
ILMN_1655251	KRTAP3-1	-5.67866	2	0.159112	0.760542	0	-9.16372	2	3.11395	0.942771	-0.000291313	1.61371	ILMN_23562	KRTAP3-1		Homo sapiens keratin associated protein 3-1 (KRTAP3-1), mRNA.	KRTAP3.1; KAP3.1	NM_031958.1
ILMN_1655261	ERP27	-9.32473	2	0.583128	0.963855	0	-8.44206	2	0.183911	0.923193	0.000291313	0.905341	ILMN_26083	ERP27	12	Homo sapiens endoplasmic reticulum protein 27 kDa (ERP27), mRNA.	ERp27; FLJ32115; C12orf46	NM_152321.1
ILMN_1655269	C2orf66	2.3654	2	3.81537	0.231928	0	1.55759	2	0.241606	0.248494	-0.000291313	0.65849	ILMN_24056	C2ORF66	2	Homo sapiens chromosome 2 open reading frame 66 (C2orf66), mRNA.	UNQ6411	NM_213608.1
ILMN_1655272	SLC23A2	-3.96882	2	3.29606	0.597892	0	1.25959	2	4.82884	0.25753	0.000291313	-0.317372	ILMN_4333	SLC23A2	20	Homo sapiens solute carrier family 23 (nucleobase transporters), member 2 (SLC23A2), transcript variant 2, mRNA.	NBTL1; SLC23A1; SVCT2; YSPL2; KIAA0238	NM_203327.1
ILMN_1655283	INPP4A	13.8406	2	7.03403	0.0527108	0	9.51648	2	5.902	0.0903614	-0.000291313	0.687576	ILMN_19517	INPP4A	2	Homo sapiens inositol polyphosphate-4-phosphatase, type I, 107kDa (INPP4A), transcript variant b, mRNA.	INPP4	NM_001566.1
ILMN_1655296	UTRN	29.4942	2	4.4919	0.0195783	0	34.85	2	2.21914	0.0195783	0.000291313	1.18159	ILMN_15375	UTRN	6	Homo sapiens utrophin (UTRN), mRNA.	DRP; DMDL; DRP1; FLJ23678	NM_007124.2
ILMN_1655307	FAM136A	3034.92	2	32.9207	0	0	2986.8	2	334.123	0	-0.000291313	0.984144	ILMN_13374	FAM136A	2	Homo sapiens family with sequence similarity 136, member A (FAM136A), mRNA.	FLJ14668	NM_032822.1
ILMN_1655329	RIOK2	772.27	2	25.6147	0	0	899.792	2	114.698	0	1.05886	1.16513	ILMN_16482	RIOK2	5	Homo sapiens RIO kinase 2 (yeast) (RIOK2), mRNA.	FLJ11159	NM_018343.1
ILMN_1655330	SPAG11B	-6.5703	2	4.24022	0.826807	0	-6.0084	2	1.73588	0.774096	0.000291313	0.914479	ILMN_14662	SPAG11B	8	Homo sapiens sperm associated antigen 11B (SPAG11B), transcript variant C, mRNA.	MGC61846; EP2C; EP2; HE2C; EP2D; SPAG11; SPAG11B; HE2	NM_058203.1
ILMN_1655340	RNF181	2003.1	2	454.434	0	0	2525.33	2	262.399	0	1.79432	1.26071	ILMN_14220	RNF181	2	Homo sapiens ring finger protein 181 (RNF181), mRNA.	HSPC238	NM_016494.3
ILMN_1655341	PLAC8L1	26.8838	2	8.03289	0.0225904	0	25.9979	2	0.42361	0.0271084	-0.000291313	0.967044	ILMN_5526	PLAC8L1	5	Homo sapiens PLAC8-like 1 (PLAC8L1), mRNA.		NM_001029869.1
ILMN_1655347	SCGB1A1	2.99457	2	2.79088	0.210843	0	-0.893946	2	1.01843	0.36747	-0.000291313	-0.298523	ILMN_3488	SCGB1A1	11	Homo sapiens secretoglobin, family 1A, member 1 (uteroglobin) (SCGB1A1), mRNA.	UGB; CCSP; CC10; CC16	NM_003357.3
ILMN_1655374	SELV	-0.424821	2	0.368445	0.353916	0	-1.04256	2	0.144959	0.375	-0.000291313	2.45413	ILMN_18733	SELV	19	Homo sapiens selenoprotein V (SELV), mRNA.		NM_182704.1
ILMN_1655377	MRPS22	2579.08	2	151.181	0	0	2874.92	2	16.9447	0	1.26892	1.11471	ILMN_7856	MRPS22	3	Homo sapiens mitochondrial ribosomal protein S22 (MRPS22), nuclear gene encoding mitochondrial protein, mRNA.	RPMS22; COXPD5; C3orf5; MRP-S22; GIBT; GK002	NM_020191.2
ILMN_1655382	DCLRE1B	88.6174	2	18.1094	0.00451807	0	51.7751	2	6.17738	0.0135542	-5.44259	0.584254	ILMN_2647	DCLRE1B	1	Homo sapiens DNA cross-link repair 1B (PSO2 homolog, S. cerevisiae) (DCLRE1B), mRNA.	SNM1B; DKFZp686C24187; FLJ12810; FLJ13998	NM_022836.2
ILMN_1655387	PRDM16	-5.15831	2	2.49751	0.72741	0	-1.96245	2	4.56648	0.433735	0.000291313	0.380444	ILMN_137264	PRDM16	1	Homo sapiens PR domain containing 16 (PRDM16), transcript variant 1, mRNA.	PFM13; MEL1; KIAA1675	NM_022114.2
ILMN_1655405	SCARF2	5.69423	2	5.28519	0.138554	0	12.2681	2	0.721892	0.064759	0.000291313	2.15447	ILMN_13788	SCARF2	22	Homo sapiens scavenger receptor class F, member 2 (SCARF2), transcript variant 1, mRNA.	SREC2; SRECRP-1; SREC-II; NSR1	NM_153334.3
ILMN_1655414	TNFSF14	-2.55734	2	1.57631	0.498494	0	-2.42698	2	0.194158	0.46988	0.000291313	0.949024	ILMN_9776	TNFSF14	19	Homo sapiens tumor necrosis factor (ligand) superfamily, member 14 (TNFSF14), transcript variant 1, mRNA.	LTg; CD258; LIGHT; HVEML; TR2	NM_003807.2
ILMN_1655418	CAPNS1	2717.44	2	23.681	0	0	2789.86	2	197.435	0	0.000291313	1.02665	ILMN_6617	CAPNS1	19	Homo sapiens calpain, small subunit 1 (CAPNS1), transcript variant 2, mRNA.	CANP; CALPAIN4; CDPS; 30K; CANPS; CAPN4	NM_001003962.1
ILMN_1655422	RPL17	3371.58	2	228.44	0	0	3363.54	2	150.831	0	-0.000291313	0.997614	ILMN_137046	RPL17	18	Homo sapiens ribosomal protein L17 (RPL17), mRNA.	rpL23	NM_000985.2
ILMN_1655426	KLK3	10.9211	2	8.05273	0.0722891	0	3.01203	2	0.731142	0.197289	-0.000291313	0.275798	ILMN_19163	KLK3	19	Homo sapiens kallikrein-related peptidase 3 (KLK3), transcript variant 6, mRNA.	hK3; APS; PSA; KLK2A1	NM_001030050.1
ILMN_1655429	TNFAIP1	540.957	2	4.87507	0	0	561.016	2	15.3499	0	0.000291313	1.03708	ILMN_14664	TNFAIP1	17	Homo sapiens tumor necrosis factor, alpha-induced protein 1 (endothelial) (TNFAIP1), mRNA.	EDP1; MGC2317; B61; B12	NM_021137.3
ILMN_1655446	XKR6	-4.05766	2	0.00800151	0.615964	0	-3.82831	2	4.8558	0.605422	0.000291313	0.943476	ILMN_30222	XKR6	8	Homo sapiens XK, Kell blood group complex subunit-related family, member 6 (XKR6), transcript variant 2, mRNA.	C8orf7; XRG6; C8orf21	NM_173683.3
ILMN_1655449	OR5R1	3.31282	2	2.13932	0.206325	0	-2.55856	2	2.80937	0.47741	-0.000291313	-0.77232	ILMN_5401	OR5R1	11	Homo sapiens olfactory receptor, family 5, subfamily R, member 1 (OR5R1), mRNA.	OR5R1P; OR11-185	NM_001004744.1
ILMN_1655468	DSG3	26.6706	2	5.26314	0.0225904	0	64.5727	2	7.03037	0.00903614	11.6426	2.42112	ILMN_1906	DSG3	18	Homo sapiens desmoglein 3 (pemphigus vulgaris antigen) (DSG3), mRNA.	DKFZp686P23184; CDHF6; PVA	NM_001944.2
ILMN_1655469	TSPAN3	1562.89	2	6.04742	0	0	2264.69	2	245.999	0	19.406	1.44904	ILMN_10474	TSPAN3	15	Homo sapiens tetraspanin 3 (TSPAN3), transcript variant 1, mRNA.	TM4SF8; TM4-A; TSPAN-3	NM_005724.4
ILMN_1655474	RNASE9	-11.9779	2	3.19585	0.995482	0	-11.2276	2	3.66437	0.987952	0.000291313	0.937358	ILMN_14572	RNASE9	14	Homo sapiens ribonuclease, RNase A family, 9 (non-active) (RNASE9), transcript variant 7, mRNA.	h461	NM_001001673.3
ILMN_1655482	TRIM27	329.627	2	3.17365	0	0	421.895	2	12.3241	0	11.473	1.27992	ILMN_25859	TRIM27	6	Homo sapiens tripartite motif-containing 27 (TRIM27), mRNA.	RFP; RNF76	NM_006510.4
ILMN_1655485	C1orf124	279.311	2	23.4723	0	0	358.854	2	56.0128	0	3.39098	1.28478	ILMN_8800	C1ORF124	1	Homo sapiens chromosome 1 open reading frame 124 (C1orf124), transcript variant 2, mRNA.	DKFZP547N043; PRO4323; DDDL1880; dJ876B10.3; RP5-876B10.3	NM_001010984.1
ILMN_1655497	EIF4B	6410.64	2	694.105	0	0	6978.9	2	424.416	0	0.000291313	1.08864	ILMN_137070	EIF4B	12	Homo sapiens eukaryotic translation initiation factor 4B (EIF4B), mRNA.	EIF-4B; PRO1843	NM_001417.4
ILMN_1655504	IFT81	42.0953	2	0.118559	0.0135542	0	37.9471	2	10.3465	0.0180723	-0.000291313	0.901457	ILMN_23654	IFT81	12	Homo sapiens intraflagellar transport 81 homolog (Chlamydomonas) (IFT81), transcript variant 1, mRNA.	CDV1R; MGC102777; CDV-1R; CDV-1; CDV1; MGC4027	NM_014055.2
ILMN_1655509	ASAH1	3.33731	2	7.5582	0.201807	0	10.0237	2	4.27271	0.0828313	0.000291313	3.00353	ILMN_27657	ASAH1	8	Homo sapiens N-acylsphingosine amidohydrolase (acid ceramidase) 1 (ASAH1), transcript variant 2, mRNA.	AC; FLJ22079; FLJ21558; PHP32; ASAH; PHP	NM_004315.3
ILMN_1655521	DMRTA1	3.16858	2	4.27508	0.210843	0	3.32557	2	3.0827	0.185241	0.000291313	1.04955	ILMN_10416	DMRTA1	9	Homo sapiens DMRT-like family A1 (DMRTA1), mRNA.	MGC163307; DMO; MGC163309	NM_022160.1
ILMN_1655525	FLCN	31.2085	2	2.17315	0.0195783	0	40.6245	2	3.61377	0.0165663	0.000291313	1.30171	ILMN_27063	FLCN	17	Homo sapiens folliculin (FLCN), transcript variant 2, mRNA.	FLCL; BHD; MGC23445; MGC17998	NM_144606.4
ILMN_1655532	ASB6	6.40563	2	7.16545	0.13253	0	9.89248	2	3.79064	0.0858434	0.000291313	1.54434	ILMN_28184	ASB6	9	Homo sapiens ankyrin repeat and SOCS box-containing 6 (ASB6), transcript variant 1, mRNA.	MGC1024; FLJ20548	NM_017873.2
ILMN_1655537	ING1	18.1037	2	4.56385	0.0361446	0	16.5984	2	1.13369	0.0421687	-0.000291313	0.916854	ILMN_2492	ING1	13	Homo sapiens inhibitor of growth family, member 1 (ING1), transcript variant 1, mRNA.	p33ING1; p33; p47ING1a; p33ING1b; p47; p24ING1c	NM_198219.1
ILMN_1655545	ZMYND12	45.2778	2	9.97209	0.0120482	0	110.803	2	0.121791	0.00301205	31.1086	2.44719	ILMN_456	ZMYND12	1	Homo sapiens zinc finger, MYND-type containing 12 (ZMYND12), mRNA.	DKFZp434N2435	NM_032257.3
ILMN_1655549	SIGLEC10	-10.3537	2	3.59988	0.983434	0	-7.57372	2	1.72731	0.876506	0.000291313	0.731501	ILMN_26163	SIGLEC10	19	Homo sapiens sialic acid binding Ig-like lectin 10 (SIGLEC10), mRNA.	SLG2; SIGLEC-10; PRO940	NM_033130.2
ILMN_1655557	INTS6	714.874	2	18.8134	0	0	918.676	2	52.2463	0	14.9326	1.28509	ILMN_137344	INTS6	13	Homo sapiens integrator complex subunit 6 (INTS6), transcript variant 2, mRNA.	DDX26; DBI-1; DKFZP434B105; Notchl2; INT6; DDX26A; HDB; DICE1	NM_001039937.1
ILMN_1655561	ARPC3	2859.02	2	381.267	0	0	4892.09	2	542.325	0	34.6105	1.71111	ILMN_14306	ARPC3	12	Homo sapiens actin related protein 2/3 complex, subunit 3, 21kDa (ARPC3), mRNA.	p21-Arc; ARC21	NM_005719.2
ILMN_1655563	KIAA0427	85.8939	2	1.46107	0.00451807	0	110.81	2	5.47617	0.00301205	2.45594	1.29008	ILMN_2842	KIAA0427	18	Homo sapiens KIAA0427 (KIAA0427), mRNA.	Gm672	NM_014772.1
ILMN_1655565	UGT3A2	-4.79674	2	2.45508	0.685241	0	-3.10123	2	4.48322	0.519578	0.000291313	0.646529	ILMN_2460	UGT3A2	5	Homo sapiens UDP glycosyltransferase 3 family, polypeptide A2 (UGT3A2), mRNA.	MGC119426; MGC119429	NM_174914.2
ILMN_1655572	C6orf59	2.57507	2	0.472515	0.224398	0	6.28085	2	2.09645	0.13253	0.000291313	2.4391	ILMN_14101	C6ORF59		PREDICTED: Homo sapiens chromosome 6 open reading frame 59 (C6orf59), misc RNA.		XR_017956.1
ILMN_1655577	TIAM1	117.316	2	30.6828	0.00301205	0	119.451	2	19.4832	0.00301205	0.000291313	1.0182	ILMN_14448	TIAM1	21	Homo sapiens T-cell lymphoma invasion and metastasis 1 (TIAM1), mRNA.	FLJ36302	NM_003253.2
ILMN_1655595	SERPINE2	9526.58	2	100.839	0	0	15124.6	2	674.402	0	68.5988	1.58762	ILMN_1946	SERPINE2	2	Homo sapiens serpin peptidase inhibitor, clade E (nexin, plasminogen activator inhibitor type 1), member 2 (SERPINE2), mRNA.	PI7; GDN; PNI; PN1	NM_006216.2
ILMN_1655608	KLHL18	174.432	2	0.000252131	0	0	184.758	2	6.12222	0	0.000291313	1.0592	ILMN_27249	KLHL18	3	Homo sapiens kelch-like 18 (Drosophila) (KLHL18), mRNA.	FLJ13703; KIAA0795	NM_025010.3
ILMN_1655610	RET	-2.3842	2	5.31767	0.483434	0	-0.119671	2	2.39363	0.328313	0.000291313	0.0501934	ILMN_2380	RET	10	Homo sapiens ret proto-oncogene (RET), transcript variant 4, mRNA.	RET51; CDHF12; RET-ELE1; HSCR1; MEN2A; PTC; MTC1; MEN2B	NM_020630.4
ILMN_1655611	TSHZ2	25.1382	2	4.92685	0.0240964	0	24.4895	2	2.01144	0.0271084	-0.000291313	0.974197	ILMN_5174	TSHZ2	20	Homo sapiens teashirt zinc finger homeobox 2 (TSHZ2), mRNA.	C20orf17; OVC10-2; TSH2; ZNF218; FLJ33887; DKFZp686K2480; ZABC2	NM_173485.4
ILMN_1655612	ARRDC2	150.246	2	16.767	0	0	121.095	2	12.2157	0.00301205	-2.07812	0.805977	ILMN_7560	ARRDC2	19	Homo sapiens arrestin domain containing 2 (ARRDC2), transcript variant 1, mRNA.	CLONE24945; PP2703	NM_015683.1
ILMN_1655622	PRKRIR	2361.68	2	336.957	0	0	1882.31	2	112.371	0	-4.85484	0.797024	ILMN_15046	PRKRIR	11	Homo sapiens protein-kinase, interferon-inducible double stranded RNA dependent inhibitor, repressor of (P58 repressor) (PRKRIR), mRNA.	MGC102750; DAP4; P52rIPK	NM_004705.2
ILMN_1655625	GPATCH1	144.526	2	7.18944	0	0	184.325	2	15.4155	0	4.91752	1.27538	ILMN_5724	GPATCH1	19	Homo sapiens G patch domain containing 1 (GPATCH1), mRNA.	GPATC1; FLJ38686; FLJ34516; ECGP; FLJ10206	NM_018025.2
ILMN_1655635	METTL3	751.564	2	41.1105	0	0	715.444	2	15.7998	0	-0.000291313	0.951939	ILMN_13907	METTL3	14	Homo sapiens methyltransferase like 3 (METTL3), mRNA.	Spo8; MT-A70; M6A; MGC4336	NM_019852.3
ILMN_1655637	UPK1A	11.4773	2	1.66782	0.0677711	0	5.87741	2	1.14137	0.141566	-0.000291313	0.512089	ILMN_10480	UPK1A	19	Homo sapiens uroplakin 1A (UPK1A), mRNA.	UP1A; MGC129751; MGC129752; UPIA; UPKA; MGC14388; TSPAN21	NM_007000.2
ILMN_1655642	FANCI	532.452	2	36.8856	0	0	210.916	2	22.3219	0	-96.5827	0.396122	ILMN_138879	FANCI	15	Homo sapiens Fanconi anemia, complementation group I (FANCI), transcript variant 2, mRNA.	FLJ10719; KIAA1794	NM_018193.2
ILMN_1655644	ZNF804A	1.21257	2	0.715575	0.268072	0	-0.707276	2	7.45632	0.35241	-0.000291313	-0.583287	ILMN_5026	ZNF804A	2	Homo sapiens zinc finger protein 804A (ZNF804A), mRNA.	C2orf10	NM_194250.1
ILMN_1655645	AK2	179.135	2	2.28829	0	0	143.316	2	9.85296	0.00150602	-3.50432	0.800042	ILMN_19751	AK2	1	Homo sapiens adenylate kinase 2 (AK2), transcript variant AK2B, mRNA.	ADK2	NM_013411.3
ILMN_1655663	SC65	737.471	2	15.7413	0	0	532.206	2	37.0759	0	-18.0991	0.721664	ILMN_21605	SC65	17	Homo sapiens synaptonemal complex protein SC65 (SC65), mRNA.	NOL55	NM_006455.2
ILMN_1655664	DGKD	-3.69904	2	4.4431	0.590361	0	-3.32041	2	0.250875	0.536145	0.000291313	0.897641	ILMN_2207	DGKD	2	Homo sapiens diacylglycerol kinase, delta 130kDa (DGKD), transcript variant 1, mRNA.	dgkd-2; DGKdelta; KIAA0145	NM_003648.2
ILMN_1655684	SARS2	766.06	2	0.529018	0	0	574.723	2	23.959	0	-14.5643	0.750232	ILMN_20962	SARS2	19	Homo sapiens seryl-tRNA synthetase 2, mitochondrial (SARS2), nuclear gene encoding mitochondrial protein, mRNA.	SERS; SARSM; FLJ20450; mtSerRS; SYS; SerRSmt; SARS	NM_017827.2
ILMN_1655690	CDR1	-4.83347	2	2.07132	0.689759	0	-3.59573	2	3.82296	0.570783	0.000291313	0.743923	ILMN_31582	CDR1	X	Homo sapiens cerebellar degeneration-related protein 1, 34kDa (CDR1), mRNA.	CDR62A; CDR34; CDR	NM_004065.2
ILMN_1655702	ABHD5	365.942	2	44.4139	0	0	374.92	2	3.02036	0	0.000291313	1.02453	ILMN_10853	ABHD5	3	Homo sapiens abhydrolase domain containing 5 (ABHD5), mRNA.	CGI58; CDS; NCIE2; IECN2; MGC8731	NM_016006.3
ILMN_1655711	PRLHR	-4.45899	2	2.44212	0.668675	0	-1.73058	2	0.349049	0.420181	0.000291313	0.38811	ILMN_27818	PRLHR	10	Homo sapiens prolactin releasing hormone receptor (PRLHR), mRNA.	MGC126541; MGC126539; GR3; GPR10; PrRPR	NM_004248.2
ILMN_1655713	OR2M7	-5.34858	2	2.98613	0.737952	0	-6.16407	2	4.68619	0.78012	-0.000291313	1.15247	ILMN_23714	OR2M7	1	Homo sapiens olfactory receptor, family 2, subfamily M, member 7 (OR2M7), mRNA.	OR1-58	NM_001004691.1
ILMN_1655720	CNNM4	140.43	2	7.53286	0	0	130.637	2	1.29338	0.00150602	-0.000291313	0.930268	ILMN_16517	CNNM4	2	Homo sapiens cyclin M4 (CNNM4), mRNA.	KIAA1592; ACDP4	NM_020184.3
ILMN_1655722	BCL2L15	3.41918	2	2.29095	0.206325	0	4.92667	2	0.984022	0.158133	0.000291313	1.44089	ILMN_2558	BCL2L15	1	Homo sapiens BCL2-like 15 (BCL2L15), mRNA.	Bfk; C1orf178; FLJ22588	NM_001010922.2
ILMN_1655733	RFC2	330.055	2	21.4538	0	0	131.799	2	30.6627	0.00150602	-57.2471	0.399324	ILMN_29985	RFC2	7	Homo sapiens replication factor C (activator 1) 2, 40kDa (RFC2), transcript variant 1, mRNA.	A1; RFC40; MGC3665	NM_181471.1
ILMN_1655734	BXDC5	785.496	2	69.4123	0	0	764.481	2	63.5109	0	-0.000291313	0.973246	ILMN_29951	BXDC5	1	Homo sapiens brix domain containing 5 (BXDC5), mRNA.	DKFZp761M0215; RPF1; RP11-118B23.1; DKFZp761G0415; FLJ12475	NM_025065.6
ILMN_1655748	ZNF323	154.364	2	41.4778	0	0	191.403	2	27.0905	0	0.000291313	1.23994	ILMN_15250	ZNF323	6	Homo sapiens zinc finger protein 323 (ZNF323), transcript variant 2, mRNA.	ZNF20-Lp; dJ874C20.2; ZNF310P; FLJ23407	NM_145909.2
ILMN_1655765	MRPS21	2366.28	2	294.899	0	0	2089.07	2	82.8479	0	-0.883818	0.882854	ILMN_10651	MRPS21	1	Homo sapiens mitochondrial ribosomal protein S21 (MRPS21), nuclear gene encoding mitochondrial protein, transcript variant 2, mRNA.	RPMS21; MRP-S21; MDS016	NM_018997.1
ILMN_1655766	ANKRD34B	-5.64703	2	1.30745	0.759036	0	-6.88609	2	3.3155	0.832831	-0.000291313	1.21942	ILMN_26735	ANKRD34B	5	Homo sapiens ankyrin repeat domain 34B (ANKRD34B), mRNA.	DP58	NM_001004441.1
ILMN_1655788	ZNF780A	-0.0266409	2	1.11917	0.328313	0	-0.898976	2	1.20772	0.36747	-0.000291313	33.7443	ILMN_2467	ZNF780A	19	Homo sapiens zinc finger protein 780A (ZNF780A), mRNA.	ZNF780	NM_001010880.1
ILMN_1655796	2010-03-03	295.114	2	17.829	0	0	387.746	2	72.4871	0	2.8994	1.31389	ILMN_138109	2010-03-03		PREDICTED: Homo sapiens membrane-associated ring finger (C3HC4) 3 (MARCH3), mRNA.		XM_001127871.1
ILMN_1655809	SF3A1	5.78013	2	0.287159	0.138554	0	6.34251	2	4.03141	0.131024	0.000291313	1.0973	ILMN_26833	SF3A1	22	Homo sapiens splicing factor 3a, subunit 1, 120kDa (SF3A1), transcript variant 1, mRNA.	SF3A120; SAP114; PRPF21; PRP21	NM_005877.4
ILMN_1655821	CAPG	109.314	2	4.98214	0.00301205	0	133.481	2	16.9451	0.00150602	0.808175	1.22109	ILMN_2712	CAPG	2	Homo sapiens capping protein (actin filament), gelsolin-like (CAPG), mRNA.	AFCP; MCP	NM_001747.2
ILMN_1655844	TAF1A	79.4386	2	1.37742	0.00451807	0	99.9038	2	16.4517	0.00301205	0.288623	1.25762	ILMN_8114	TAF1A	1	Homo sapiens TATA box binding protein (TBP)-associated factor, RNA polymerase I, A, 48kDa (TAF1A), transcript variant 1, mRNA.	TAFI48; SL1; RAFI48; MGC:17061	NM_005681.2
ILMN_1655849	GSC	7.10837	2	2.12673	0.120482	0	8.85745	2	3.92807	0.0978916	0.000291313	1.24606	ILMN_5248	GSC	14	Homo sapiens goosecoid homeobox (GSC), mRNA.		NM_173849.2
ILMN_1655867	HRASLS	263.526	2	45.9426	0	0	262.187	2	10.6549	0	-0.000291313	0.994915	ILMN_9767	HRASLS	3	Homo sapiens HRAS-like suppressor (HRASLS), mRNA.	HSD28; A-C1; H-REV107; HRASLS1	NM_020386.2
ILMN_1655880	CHST11	2.02782	2	2.19135	0.24247	0	-3.57103	2	2.67658	0.567771	-0.000291313	-1.76102	ILMN_23404	CHST11	12	Homo sapiens carbohydrate (chondroitin 4) sulfotransferase 11 (CHST11), mRNA.	C4ST1; HSA269537; C4ST-1; C4ST	NM_018413.3
ILMN_1655884	ATP2A2	1456.97	2	530.7	0	0	1711.06	2	128.594	0	0.000291313	1.17439	ILMN_4412	ATP2A2	12	Homo sapiens ATPase, Ca++ transporting, cardiac muscle, slow twitch 2 (ATP2A2), transcript variant 1, mRNA.	DAR; ATP2B; MGC45367; DD; SERCA2	NM_170665.2
ILMN_1655892	TMEM32	8.09615	2	5.31687	0.108434	0	2.08022	2	0.696295	0.224398	-0.000291313	0.25694	ILMN_31173	TMEM32	X	Homo sapiens transmembrane protein 32 (TMEM32), mRNA.		NM_173470.1
ILMN_1655893	C9orf93	-2.05545	2	1.80219	0.468373	0	-0.232932	2	3.63164	0.331325	0.000291313	0.113324	ILMN_37864	C9ORF93	9	Homo sapiens chromosome 9 open reading frame 93 (C9orf93), mRNA.	DKFZp686P12113; FLJ46740; bA536D16.1; FLJ39267; MGC50805; bA778P13.1	NM_173550.2
ILMN_1655894	MYL1	3.34055	2	2.88536	0.206325	0	7.89511	2	4.10387	0.111446	0.000291313	2.36342	ILMN_29572	MYL1	2	Homo sapiens myosin, light chain 1, alkali; skeletal, fast (MYL1), transcript variant 1f, mRNA.	MLC3F; MLC1F	NM_079420.2
ILMN_1655904	ROR1	32.2239	2	4.09953	0.0180723	0	14.3551	2	3.43609	0.0512048	-1.34333	0.445481	ILMN_3567	ROR1	1	Homo sapiens receptor tyrosine kinase-like orphan receptor 1 (ROR1), transcript variant 1, mRNA.	dJ537F10.1; NTRKR1; MGC99659	NM_005012.2
ILMN_1655906	FBXW7	4.23065	2	0.993458	0.180723	0	11.1819	2	2.37618	0.0737952	0.000291313	2.64307	ILMN_18088	FBXW7	4	Homo sapiens F-box and WD repeat domain containing 7 (FBXW7), transcript variant 2, mRNA.	DKFZp686F23254; AGO; FBXW6; SEL-10; CDC4; FBX30; SEL10; FBW7	NM_018315.4
ILMN_1655913	NUCB2	1121.8	2	135.199	0	0	806.253	2	50.5977	0	-16.0149	0.718713	ILMN_23510	NUCB2	11	Homo sapiens nucleobindin 2 (NUCB2), mRNA.	NEFA	NM_005013.2
ILMN_1655915	MMP11	168.276	2	33.2021	0	0	160.995	2	20.8835	0	-0.000291313	0.956731	ILMN_16214	MMP11	22	Homo sapiens matrix metallopeptidase 11 (stromelysin 3) (MMP11), mRNA.	ST3; SL-3; STMY3	NM_005940.3
ILMN_1655921	GTF2E1	231.352	2	8.93053	0	0	275.225	2	38.322	0	0.956811	1.18964	ILMN_18952	GTF2E1	3	Homo sapiens general transcription factor IIE, polypeptide 1 (alpha subunit, 56kD) (GTF2E1), mRNA.	TFIIE-A; FE	NM_005513.1
ILMN_1655924	TRNT1	501.846	2	40.877	0	0	458.884	2	44.5191	0	-0.000291313	0.914393	ILMN_9182	TRNT1	3	Homo sapiens tRNA nucleotidyl transferase, CCA-adding, 1 (TRNT1), mRNA.	CGI-47; MtCCA; CCA1	NM_182916.1
ILMN_1655932	RPE	-8.66201	2	0.683369	0.933735	0	-1.47261	2	2.67615	0.39759	0.000291313	0.170007	ILMN_9823	RPE	2	Homo sapiens ribulose-5-phosphate-3-epimerase (RPE), transcript variant 1, mRNA.	MGC2636; RPE2-1	NM_199229.1
ILMN_1655935	ADCY7	44.2891	2	15.5184	0.0120482	0	47.6291	2	5.20832	0.0150602	0.000291313	1.07541	ILMN_24596	ADCY7	16	Homo sapiens adenylate cyclase 7 (ADCY7), mRNA.	KIAA0037; FLJ36387	NM_001114.3
ILMN_1655950	ZHX1	14.3199	2	2.80179	0.0512048	0	17.0801	2	2.50781	0.0406627	0.000291313	1.19275	ILMN_11884	ZHX1	8	Homo sapiens zinc fingers and homeoboxes 1 (ZHX1), transcript variant 1, mRNA.		NM_001017926.1
ILMN_1655955	LRRIQ1	-0.30871	2	4.20312	0.34488	0	16.0646	2	3.38662	0.0436747	0.907475	-52.0378	ILMN_22477	LRRIQ1	12	Homo sapiens leucine-rich repeats and IQ motif containing 1 (LRRIQ1), transcript variant 2, mRNA.	FLJ12303	NM_032165.3
ILMN_1655961	C7orf54	98.7638	2	17.3573	0.00301205	0	86.0074	2	9.5704	0.0060241	-0.000291313	0.87084	ILMN_21136	C7ORF54	7	Homo sapiens chromosome 7 open reading frame 54 (C7orf54), mRNA.	NSG-X; NAG8; MGC138346	NM_014411.2
ILMN_1655974	PDE6B	105.339	2	6.54845	0.00301205	0	152.631	2	5.18154	0.00150602	11.481	1.44895	ILMN_29765	PDE6B	4	Homo sapiens phosphodiesterase 6B, cGMP-specific, rod, beta (congenital stationary night blindness 3, autosomal dominant) (PDE6B), mRNA.	CSNB3; PDEB	NM_000283.1
ILMN_1655983	CDC14A	2.71648	2	1.51998	0.218373	0	10.1074	2	7.78122	0.0813253	0.000291313	3.72075	ILMN_22859	CDC14A	1	Homo sapiens CDC14 cell division cycle 14 homolog A (S. cerevisiae) (CDC14A), transcript variant 3, mRNA.	hCDC14; cdc14	NM_033313.2
ILMN_1655985	GALNT10	18.4738	2	5.48929	0.0346385	0	13.2128	2	0.887417	0.0527108	-0.000291313	0.715218	ILMN_8911	GALNT10	5	Homo sapiens UDP-N-acetyl-alpha-D-galactosamine:polypeptide N-acetylgalactosaminyltransferase 10 (GalNAc-T10) (GALNT10), transcript variant 2, mRNA.	GalNAcT10; FLJ00205; FLJ11715; pp-GalNAc-T10; DKFZp586H0623	NM_017540.3
ILMN_1655987	STAB1	-6.90414	2	0.213295	0.84488	0	-3.40759	2	10.7261	0.549699	0.000291313	0.493557	ILMN_13048	STAB1	3	Homo sapiens stabilin 1 (STAB1), mRNA.	CLEVER-1; KIAA0246; STAB-1; FELE-1; FEX1; FEEL-1	NM_015136.2
ILMN_1655990	CDK5RAP2	606.115	2	108.532	0	0	509.662	2	3.97066	0	-0.720359	0.840867	ILMN_3896	CDK5RAP2	9	Homo sapiens CDK5 regulatory subunit associated protein 2 (CDK5RAP2), transcript variant 1, mRNA.	MCPH3; DKFZp686D1070; Cep215; KIAA1633; C48; DKFZp686B1070	NM_018249.4
ILMN_1656011	RGS1	-1.94685	2	6.49625	0.468373	0	-4.73981	2	0.440839	0.679217	-0.000291313	2.4346	ILMN_3436	RGS1	1	Homo sapiens regulator of G-protein signaling 1 (RGS1), mRNA.	BL34; IR20; IER1; 1R20	NM_002922.3
ILMN_1656016	DHX9	619.686	2	180.589	0	0	615.29	2	19.6727	0	-0.000291313	0.992906	ILMN_7196	DHX9	1	Homo sapiens DEAH (Asp-Glu-Ala-His) box polypeptide 9 (DHX9), mRNA.	NDH II; LKP; NDHII; DDX9; RHA	NM_001357.3
ILMN_1656017	NRF1	26.6109	2	1.28814	0.0225904	0	18.7372	2	2.46234	0.0361446	-0.000291313	0.704118	ILMN_9890	NRF1	7	Homo sapiens nuclear respiratory factor 1 (NRF1), transcript variant 2, mRNA.	ALPHA-PAL	NM_001040110.1
ILMN_1656040	NTN2L	-2.70992	2	0.970277	0.518072	0	-4.766	2	1.49598	0.679217	-0.000291313	1.75872	ILMN_6765	NTN2L	16	Homo sapiens netrin 2-like (chicken) (NTN2L), mRNA.		NM_006181.1
ILMN_1656042	KIAA0319L	132.01	2	11.1457	0	0	158.214	2	28.1046	0	0.000291313	1.1985	ILMN_21669	KIAA0319L	1	Homo sapiens KIAA0319-like (KIAA0319L), transcript variant 1, mRNA.	PP791; RP4-765A10.3; KIAA1837; PKD1-like	NM_024874.3
ILMN_1656045	BRUNOL6	17.2297	2	12.3608	0.0421687	0	33.3989	2	7.11104	0.0210843	0.000291313	1.93844	ILMN_21527	BRUNOL6	15	Homo sapiens bruno-like 6, RNA binding protein (Drosophila) (BRUNOL6), mRNA.	CELF6	NM_052840.3
ILMN_1656051	KRTAP19-4	-0.92509	2	5.67752	0.388554	0	2.13453	2	5.23109	0.222892	0.000291313	-2.30738	ILMN_27627	KRTAP19-4	21	Homo sapiens keratin associated protein 19-4 (KRTAP19-4), mRNA.	KAP19.4	NM_181610.1
ILMN_1656057	PLAU	165.921	2	8.77368	0	0	278.073	2	14.2316	0	44.7227	1.67593	ILMN_24167	PLAU	10	Homo sapiens plasminogen activator, urokinase (PLAU), mRNA.	UPA; URK; u-PA; ATF	NM_002658.2
ILMN_1656066	TNPO2	1795.84	2	265.774	0	0	1583.71	2	62.8852	0	-0.179789	0.881878	ILMN_4771	TNPO2	19	Homo sapiens transportin 2 (importin 3, karyopherin beta 2b) (TNPO2), mRNA.	KPNB2B; FLJ12155; TRN2; IPO3	NM_013433.3
ILMN_1656069	C17orf55	3.39726	2	0.346754	0.206325	0	-0.210694	2	0.821412	0.329819	-0.000291313	-0.0620188	ILMN_17830	C17ORF55	17	Homo sapiens chromosome 17 open reading frame 55 (C17orf55), mRNA.	MGC120556; FLJ39421; MGC120553	NM_178519.2
ILMN_1656079	KCNQ1	112.745	2	21.3628	0.00301205	0	93.3364	2	9.83135	0.00451807	-0.000291313	0.827853	ILMN_22163	KCNQ1	11	Homo sapiens potassium voltage-gated channel, KQT-like subfamily, member 1 (KCNQ1), transcript variant 1, mRNA.	JLNS1; ATFB1; WRS; LQT; Kv1.9; RWS; Kv7.1; FLJ26167; SQT2; KCNA8; KVLQT1; KCNA9; LQT1	NM_000218.2
ILMN_1656088	C1orf110	-2.59047	2	2.62282	0.501506	0	0.113366	2	2.03706	0.319277	0.000291313	-0.0437628	ILMN_14513	C1ORF110	1	Homo sapiens chromosome 1 open reading frame 110 (C1orf110), mRNA.	MGC48998; FLJ41579; RP11-331H2.2	NM_178550.3
ILMN_1656097	SLCO1A2	-1.36933	2	3.30446	0.423193	0	-3.77104	2	0.148002	0.593373	-0.000291313	2.75394	ILMN_22501	SLCO1A2	12	Homo sapiens solute carrier organic anion transporter family, member 1A2 (SLCO1A2), transcript variant 1, mRNA.	OATP-A; OATP1A2; OATP; SLC21A3	NM_134431.2
ILMN_1656111	MYLIP	438.883	2	11.6023	0	0	380.947	2	15.3451	0	-1.9481	0.867993	ILMN_9457	MYLIP	6	Homo sapiens myosin regulatory light chain interacting protein (MYLIP), mRNA.	MIR	NM_013262.3
ILMN_1656118	ZBTB7A	9.13861	2	5.53446	0.0948795	0	20.2409	2	1.12038	0.0301205	0.000291313	2.21487	ILMN_24981	ZBTB7A	19	Homo sapiens zinc finger and BTB domain containing 7A (ZBTB7A), mRNA.	MGC99631; FBI1; ZBTB7; LRF; DKFZp547O146; FBI-1; pokemon	NM_015898.2
ILMN_1656129	SLC39A10	607.408	2	58.8409	0	0	192.769	2	9.30319	0	-141.089	0.317364	ILMN_13415	SLC39A10	2	Homo sapiens solute carrier family 39 (zinc transporter), member 10 (SLC39A10), mRNA.	MGC126565; MGC138428; LZT-Hs2; DKFZp781L10106	NM_020342.1
ILMN_1656132	PNLDC1	4.08426	2	0.583043	0.182229	0	11.2589	2	0.726692	0.0737952	0.000291313	2.75665	ILMN_14136	PNLDC1	6	Homo sapiens poly(A)-specific ribonuclease (PARN)-like domain containing 1 (PNLDC1), mRNA.	FLJ40240; MGC138451; dJ195P10.2	NM_173516.1
ILMN_1656134	CNOT7	1145.18	2	73.1012	0	0	1334.44	2	87.8222	0	3.87771	1.16526	ILMN_137418	CNOT7	8	Homo sapiens CCR4-NOT transcription complex, subunit 7 (CNOT7), transcript variant 1, mRNA.	CAF1; hCAF-1	NM_013354.5
ILMN_1656136	STAU1	1865.41	2	186.054	0	0	2073.63	2	195.189	0	0.161585	1.11162	ILMN_137068	STAU1	20	Homo sapiens staufen, RNA binding protein, homolog 1 (Drosophila) (STAU1), transcript variant T4, mRNA.	FLJ25010; STAU	NM_004602.2
ILMN_1656144	MAPKAPK2	26.8464	2	4.33893	0.0225904	0	33.8918	2	0.362368	0.0195783	0.000291313	1.26244	ILMN_3609	MAPKAPK2	1	Homo sapiens mitogen-activated protein kinase-activated protein kinase 2 (MAPKAPK2), transcript variant 1, mRNA.		NM_004759.3
ILMN_1656145	GOT1	2168.38	2	126.917	0	0	2411.02	2	62.878	0	1.09376	1.1119	ILMN_19908	GOT1	10	Homo sapiens glutamic-oxaloacetic transaminase 1, soluble (aspartate aminotransferase 1) (GOT1), mRNA.	GIG18	NM_002079.1
ILMN_1656159	ATP10D	6.25781	2	2.02072	0.131024	0	16.1973	2	9.28369	0.0421687	0.000291313	2.58834	ILMN_11723	ATP10D	4	Homo sapiens ATPase, class V, type 10D (ATP10D), mRNA.	KIAA1487; ATPVD	NM_020453.2
ILMN_1656165	USP9X	947.289	2	72.2728	0	0	1158.21	2	112.686	0	5.19828	1.22266	ILMN_17946	USP9X	X	Homo sapiens ubiquitin specific peptidase 9, X-linked (USP9X), transcript variant 4, mRNA.	DFFRX; FAF	NM_001039591.2
ILMN_1656171	ADAMTS19	10.2618	2	5.63131	0.0753012	0	9.24023	2	3.5086	0.0918675	-0.000291313	0.900453	ILMN_8089	ADAMTS19	5	Homo sapiens ADAM metallopeptidase with thrombospondin type 1 motif, 19 (ADAMTS19), mRNA.		NM_133638.2
ILMN_1656185	DEF8	770.286	2	151.386	0	0	642.237	2	61.8982	0	-0.334665	0.833765	ILMN_2786	DEF8	16	Homo sapiens differentially expressed in FDCP 8 homolog (mouse) (DEF8), transcript variant 2, mRNA.	FLJ20186; MGC104349	NM_017702.2
ILMN_1656186	SLC41A1	226.049	2	1.9139	0	0	198.581	2	6.29243	0	-0.424253	0.878486	ILMN_2825	SLC41A1	1	Homo sapiens solute carrier family 41, member 1 (SLC41A1), mRNA.	MgtE	NM_173854.4
ILMN_1656192	ZNF704	19.2319	2	2.4031	0.0331325	0	13.1709	2	2.64721	0.0557229	-0.000291313	0.684846	ILMN_26345	ZNF704	8	Homo sapiens zinc finger protein 704 (ZNF704), mRNA.	Gig1; FLJ16218	NM_001033723.1
ILMN_1656193	MGC33407	-0.72613	2	2.82609	0.375	0	-0.678318	2	4.07217	0.35241	0.000291313	0.934155	ILMN_5881	MGC33407	19	Homo sapiens hypothetical protein MGC33407 (MGC33407), mRNA.	HSD21	NM_178525.2
ILMN_1656194	TSPAN10	71.6375	2	5.2215	0.00451807	0	59.5161	2	1.54137	0.00903614	-0.000291313	0.830795	ILMN_12531	TSPAN10	17	Homo sapiens tetraspanin 10 (TSPAN10), mRNA.	OCSP; FLJ39607	NM_031945.3
ILMN_1656196	E2F6	809.072	2	44.8922	0	0	1066.43	2	82.5865	0	15.1619	1.31809	ILMN_14185	E2F6	2	Homo sapiens E2F transcription factor 6 (E2F6), mRNA.	E2F-6; MGC111545	NM_198256.2
ILMN_1656200	KATNAL2	7.31925	2	6.40568	0.114458	0	5.68914	2	7.52291	0.143072	-0.000291313	0.777285	ILMN_21476	KATNAL2	18	Homo sapiens katanin p60 subunit A-like 2 (KATNAL2), mRNA.	DKFZP667C165; MGC33211	NM_031303.1
ILMN_1656221	OR2T27	-4.03412	2	2.10003	0.620482	0	-3.03426	2	3.37517	0.509036	0.000291313	0.752148	ILMN_16883	OR2T27	1	Homo sapiens olfactory receptor, family 2, subfamily T, member 27 (OR2T27), mRNA.		NM_001001824.1
ILMN_1656225	DUPD1	-3.92934	2	0.702633	0.603916	0	0.489953	2	1.27127	0.298193	0.000291313	-0.124691	ILMN_10577	DUPD1	10	Homo sapiens dual specificity phosphatase and pro isomerase domain containing 1 (DUPD1), mRNA.	DUSP27; FMDSP	NM_001003892.1
ILMN_1656248	ASAM	-3.07264	2	0.274944	0.542169	0	-1.3019	2	2.60432	0.388554	0.000291313	0.423707	ILMN_27333	ASAM	11	Homo sapiens adipocyte-specific adhesion molecule (ASAM), mRNA.	FLJ22415; CLMP; ACAM	NM_024769.2
ILMN_1656274	PRPF38A	365.354	2	11.5053	0	0	280.42	2	18.5065	0	-9.80314	0.767528	ILMN_14856	PRPF38A	1	Homo sapiens PRP38 pre-mRNA processing factor 38 (yeast) domain containing A (PRPF38A), mRNA.	MGC3320; RP5-965L7.1; FLJ14936	NM_032864.3
ILMN_1656285	METTL7A	234.43	2	7.28142	0	0	245.855	2	9.18559	0	0.000291313	1.04874	ILMN_138519	METTL7A	12	Homo sapiens methyltransferase like 7A (METTL7A), mRNA.	AAM-B; DKFZP586A0522	NM_014033.3
ILMN_1656287	SPOCK2	6.78178	2	2.04561	0.126506	0	50.4898	2	5.98058	0.0150602	17.9034	7.44492	ILMN_25950	SPOCK2	10	Homo sapiens sparc/osteonectin, cwcv and kazal-like domains proteoglycan (testican) 2 (SPOCK2), mRNA.	testican-2	NM_014767.1
ILMN_1656291	TSKS	-7.47476	2	7.92874	0.900602	0	-4.09599	2	0.727347	0.638554	0.000291313	0.547977	ILMN_27613	TSKS	19	Homo sapiens testis-specific kinase substrate (TSKS), mRNA.	TSKS1	NM_021733.1
ILMN_1656293	GOSR2	386.64	2	108.017	0	0	381.358	2	21.6008	0	-0.000291313	0.986341	ILMN_4229	GOSR2	17	Homo sapiens golgi SNAP receptor complex member 2 (GOSR2), transcript variant A, mRNA.	GS27; MEMBRIN; Bos1	NM_004287.3
ILMN_1656297	C21orf57	804.302	2	6.96082	0	0	868.369	2	34.5292	0	0.000291313	1.07966	ILMN_21121	C21ORF57	21	Homo sapiens chromosome 21 open reading frame 57 (C21orf57), transcript variant 1, mRNA.	FLJ46907	NM_058181.1
ILMN_1656300	GFRA2	58.5528	2	12.3179	0.00903614	0	71.4214	2	0.722598	0.0060241	0.000291313	1.21978	ILMN_24176	GFRA2	8	Homo sapiens GDNF family receptor alpha 2 (GFRA2), mRNA.	NTNRA; TRNR2; RETL2; NRTNR-ALPHA; GDNFRB	NM_001495.4
ILMN_1656310	INDO	-11.7364	2	2.8443	0.993976	0	-9.95989	2	3.83647	0.963855	0.000291313	0.848631	ILMN_7704	INDO	8	Homo sapiens indoleamine-pyrrole 2,3 dioxygenase (INDO), mRNA.	CD107B; IDO	NM_002164.3
ILMN_1656315	DMD	60.1865	2	0.673875	0.00903614	0	62.3591	2	0.404655	0.00903614	0.000291313	1.0361	ILMN_18739	DMD	X	Homo sapiens dystrophin (muscular dystrophy, Duchenne and Becker types) (DMD), transcript variant Dp427p2, mRNA.	DXS272; DXS269; DXS268; DXS270; DXS239; DXS142; DXS206; DXS230; CMD3B; DXS164; BMD	NM_004010.1
ILMN_1656316	ZMYM3	179.77	2	19.8285	0	0	212.548	2	29.4134	0	0.522978	1.18233	ILMN_26001	ZMYM3	X	Homo sapiens zinc finger, MYM-type 3 (ZMYM3), transcript variant 2, mRNA.	ZNF261; DXS6673E; XFIM; MYM; KIAA0385; ZNF198L2	NM_201599.1
ILMN_1656321	LTBP1	5.7545	2	1.38218	0.14006	0	9.17818	2	3.3782	0.0918675	0.000291313	1.59496	ILMN_18654	LTBP1	2	Homo sapiens latent transforming growth factor beta binding protein 1 (LTBP1), transcript variant 1, mRNA.	MGC163161	NM_206943.1
ILMN_1656327	GLT1D1	7.19106	2	1.65927	0.115964	0	5.6202	2	2.2612	0.143072	-0.000291313	0.781554	ILMN_25181	GLT1D1	12	Homo sapiens glycosyltransferase 1 domain containing 1 (GLT1D1), mRNA.	FLJ31978	NM_144669.1
ILMN_1656330	CCKAR	-0.656578	2	0.0979826	0.373494	0	-3.12135	2	0.49734	0.519578	-0.000291313	4.75397	ILMN_19413	CCKAR	4	Homo sapiens cholecystokinin A receptor (CCKAR), mRNA.	CCK1-R; CCKRA; CCK-A	NM_000730.2
ILMN_1656335	RIT1	151.92	2	28.1024	0	0	238.237	2	32.3155	0	11.13	1.56817	ILMN_8608	RIT1	1	Homo sapiens Ras-like without CAAX 1 (RIT1), mRNA.	MGC125865; RIBB; RIT; ROC1; MGC125864	NM_006912.4
ILMN_1656338	PTPRS	13.7912	2	7.83391	0.0527108	0	4.63472	2	2.26523	0.158133	-0.000291313	0.336065	ILMN_1165	PTPRS	19	Homo sapiens protein tyrosine phosphatase, receptor type, S (PTPRS), transcript variant 3, mRNA.	PTPSIGMA	NM_130853.2
ILMN_1656361	LOC201175	143.769	2	2.36968	0	0	106.33	2	9.9722	0.00301205	-5.31945	0.739589	ILMN_25445	LOC201175	17	Homo sapiens hypothetical protein LOC201175 (LOC201175), mRNA.		NM_174919.2
ILMN_1656364	ASB12	-7.25689	2	2.26614	0.876506	0	-5.43659	2	2.24544	0.728916	0.000291313	0.749162	ILMN_29573	ASB12	X	Homo sapiens ankyrin repeat and SOCS box-containing 12 (ASB12), mRNA.	FLJ39577	NM_130388.2
ILMN_1656368	ALDH4A1	743.664	2	44.7563	0	0	593.843	2	33.6242	0	-8.50337	0.798537	ILMN_10603	ALDH4A1	1	Homo sapiens aldehyde dehydrogenase 4 family, member A1 (ALDH4A1), nuclear gene encoding mitochondrial protein, transcript variant P5CDhS, mRNA.	P5CDh; P5CD; ALDH4; P5CDhL; P5CDhS	NM_170726.1
ILMN_1656369	C8orf4	-1.91693	2	2.52499	0.462349	0	1.64895	2	2.77448	0.246988	0.000291313	-0.860204	ILMN_24837	C8ORF4	8	Homo sapiens chromosome 8 open reading frame 4 (C8orf4), mRNA.	MGC22806; TC1; TC-1; hTC-1	NM_020130.3
ILMN_1656371	TRPA1	-7.99556	2	0.610227	0.915663	0	-5.5894	2	0.0802455	0.733434	0.000291313	0.699064	ILMN_7264	TRPA1	8	Homo sapiens transient receptor potential cation channel, subfamily A, member 1 (TRPA1), mRNA.	ANKTM1	NM_007332.2
ILMN_1656372	PES1	174.113	2	29.8744	0	0	132.198	2	21.3198	0.00150602	-2.02503	0.759269	ILMN_12832	PES1	22	Homo sapiens pescadillo homolog 1, containing BRCT domain (zebrafish) (PES1), mRNA.	PES	NM_014303.2
ILMN_1656373	BNC2	5.63876	2	3.57952	0.14006	0	0.365442	2	3.32049	0.307229	-0.000291313	0.0648089	ILMN_12355	BNC2	9	Homo sapiens basonuclin 2 (BNC2), mRNA.	DKFZp686A01127; FLJ34928; FLJ20043; BSN2	NM_017637.5
ILMN_1656383	SOHLH1	-8.18162	2	2.32405	0.924699	0	-3.63448	2	5.8952	0.576807	0.000291313	0.444225	ILMN_14278	SOHLH1	9	Homo sapiens spermatogenesis and oogenesis specific basic helix-loop-helix 1 (SOHLH1), mRNA.	bA100C15.3; C9orf157; NOHLH; TEB2	NM_001012415.1
ILMN_1656386	SEC24D	447.66	2	43.7878	0	0	599.562	2	40.9089	0	18.0229	1.33933	ILMN_7795	SEC24D	4	Homo sapiens SEC24 related gene family, member D (S. cerevisiae) (SEC24D), mRNA.	FLJ43974; KIAA0755	NM_014822.1
ILMN_1656395	MYOT	4.98439	2	0.347291	0.158133	0	5.73751	2	3.95166	0.143072	0.000291313	1.1511	ILMN_9637	MYOT	5	Homo sapiens myotilin (MYOT), mRNA.	LGMD1A; LGMD1; TTID	NM_006790.1
ILMN_1656399	TCEAL8	1373.8	2	170.365	0	0	1503.74	2	32.358	0	0.000291313	1.09458	ILMN_12551	TCEAL8	X	Homo sapiens transcription elongation factor A (SII)-like 8 (TCEAL8), transcript variant 2, mRNA.	MGC45400	NM_001006684.1
ILMN_1656409	STON1-GTF2A1L	-5.2069	2	2.99917	0.737952	0	-0.586055	2	3.98482	0.349398	0.000291313	0.112553	ILMN_4312	STON1-GTF2A1L	2	Homo sapiens STON1-GTF2A1L readthrough transcript (STON1-GTF2A1L), mRNA.	MGC126823; SALF; MGC126821	NM_172311.1
ILMN_1656410	TRPC6	21.5852	2	1.38393	0.0286145	0	17.1637	2	2.14897	0.0406627	-0.000291313	0.795161	ILMN_13843	TRPC6	11	Homo sapiens transient receptor potential cation channel, subfamily C, member 6 (TRPC6), mRNA.	FLJ11098; FSGS2; FLJ14863; TRP6	NM_004621.4
ILMN_1656413	ZMPSTE24	4536.73	2	64.7478	0	0	4573.68	2	67.3324	0	0.000291313	1.00814	ILMN_13713	ZMPSTE24	1	Homo sapiens zinc metallopeptidase (STE24 homolog, S. cerevisiae) (ZMPSTE24), mRNA.	FLJ14968; STE24; FACE-1; Ste24p; FACE1	NM_005857.3
ILMN_1656415	CDKN2C	141.071	2	6.55797	0	0	276.988	2	28.0942	0	49.8738	1.96346	ILMN_138785	CDKN2C	1	Homo sapiens cyclin-dependent kinase inhibitor 2C (p18, inhibits CDK4) (CDKN2C), transcript variant 2, mRNA.	INK4C; p18-INK4C; p18	NM_078626.2
ILMN_1656419	RAB11FIP1	0.093714	2	5.70285	0.329819	0	7.14906	2	6.47036	0.121988	0.000291313	76.2859	ILMN_4635	RAB11FIP1	8	Homo sapiens RAB11 family interacting protein 1 (class I) (RAB11FIP1), transcript variant 2, mRNA.	FLJ22622; DKFZp686E2214; rab11-FIP1; RCP; NOEL1A; MGC78448; FLJ22524	NM_001002233.1
ILMN_1656422	GPR87	0.709135	2	0.652046	0.293675	0	0.795738	2	0.212064	0.281627	0.000291313	1.12213	ILMN_23242	GPR87	3	Homo sapiens G protein-coupled receptor 87 (GPR87), mRNA.	FKSG78; MGC131898; GPR95; KPG_002	NM_023915.2
ILMN_1656434	IHPK1	20.134	2	3.29226	0.0301205	0	18.3272	2	2.63756	0.0361446	-0.000291313	0.910262	ILMN_1661	IHPK1	3	Homo sapiens inositol hexaphosphate kinase 1 (IHPK1), transcript variant 1, mRNA.	PiUS; IP6K1; MGC9925	NM_153273.3
ILMN_1656436	RBMS1	-3.28613	2	0.640625	0.558735	0	-5.92757	2	0.453444	0.763554	-0.000291313	1.80382	ILMN_18860	RBMS1	2	Homo sapiens RNA binding motif, single stranded interacting protein 1 (RBMS1), transcript variant 2, mRNA.	MGC3331; MSSP-1; MSSP; YC1; SCR2; MSSP-3; MGC15146; MSSP-2	NM_016839.2
ILMN_1656452	C16orf59	604.59	2	6.35102	0	0	173.905	2	11.1915	0	-155.338	0.287641	ILMN_137078	C16ORF59	16	Homo sapiens chromosome 16 open reading frame 59 (C16orf59), mRNA.	FLJ13909	NM_025108.2
ILMN_1656463	C11orf73	235.637	2	17.4308	0	0	211.599	2	22.0477	0	-0.000291313	0.897988	ILMN_36010	C11ORF73	11	Homo sapiens chromosome 11 open reading frame 73 (C11orf73), mRNA.	L7RN6; HSPC179; HSPC138	NM_016401.2
ILMN_1656482	OSBPL2	499.551	2	4.02193	0	0	902.697	2	76.6343	0	68.3207	1.80702	ILMN_11635	OSBPL2	20	Homo sapiens oxysterol binding protein-like 2 (OSBPL2), transcript variant 2, mRNA.	MGC8342; MGC4307; KIAA0772; ORP2; FLJ20223; ORP-2	NM_144498.1
ILMN_1656487	FGA	175.217	2	12.4535	0	0	179.132	2	1.61204	0	0.000291313	1.02234	ILMN_11182	FGA	4	Homo sapiens fibrinogen alpha chain (FGA), transcript variant alpha, mRNA.	MGC119423; MGC119425; Fib2; MGC119422	NM_021871.2
ILMN_1656496	EPC2	30.8865	2	0.264759	0.0195783	0	42.0769	2	2.81908	0.0165663	0.000291313	1.36231	ILMN_26742	EPC2	2	Homo sapiens enhancer of polycomb homolog 2 (Drosophila) (EPC2), mRNA.	DKFZP566F2124	NM_015630.2
ILMN_1656501	DUSP5	1358.93	2	80.4822	0	0	4901.35	2	171.427	0	350.901	3.60679	ILMN_12928	DUSP5	10	Homo sapiens dual specificity phosphatase 5 (DUSP5), mRNA.	HVH3; DUSP	NM_004419.3
ILMN_1656504	ZNF304	54.6414	2	5.42742	0.0105422	0	55.4957	2	0.121903	0.0105422	0.000291313	1.01563	ILMN_20222	ZNF304	19	Homo sapiens zinc finger protein 304 (ZNF304), mRNA.	MGC129703; MGC129704	NM_020657.1
ILMN_1656521	CGI-96	421.134	2	115.927	0	0	210.11	2	28.2308	0	-9.62243	0.498914	ILMN_12816	CGI-96		PREDICTED: Homo sapiens CGI-96 protein (CGI-96), mRNA.		XM_001125724.1
ILMN_1656537	SNRPN	-8.85615	2	0.286535	0.944277	0	-4.889	2	0.60458	0.689759	0.000291313	0.552046	ILMN_17485	SNRPN	15	Homo sapiens small nuclear ribonucleoprotein polypeptide N (SNRPN), transcript variant 3, mRNA.	SMN; SM-D; SNRNP-N; SNURF-SNRPN; HCERN3; RT-LI	NM_022806.2
ILMN_1656540	RUVBL1	917.115	2	38.9404	0	0	740.392	2	47.8832	0	-7.60512	0.807305	ILMN_16596	RUVBL1	3	Homo sapiens RuvB-like 1 (E. coli) (RUVBL1), mRNA.	TIH1; ECP54; RVB1; Pontin52; NMP238; TIP49; TIP49A	NM_003707.1
ILMN_1656546	ARHGEF11	-5.13236	2	2.85855	0.712349	0	-4.79308	2	1.90575	0.682229	0.000291313	0.933894	ILMN_2135	ARHGEF11	1	Homo sapiens Rho guanine nucleotide exchange factor (GEF) 11 (ARHGEF11), transcript variant 2, mRNA.	KIAA0380; DKFZp667F1223; PDZ-RHOGEF; GTRAP48	NM_198236.1
ILMN_1656557	ARMC8	10.9246	2	4.15892	0.0692771	0	13.0976	2	5.94797	0.0572289	0.000291313	1.19891	ILMN_20651	ARMC8	3	Homo sapiens armadillo repeat containing 8 (ARMC8), transcript variant 3, mRNA.	MGC10058; MGC4880; HSPC056; S863-2	NM_213654.1
ILMN_1656560	DKFZP564O0823	486.649	2	39.7254	0	0	325.106	2	35.0909	0	-20.8704	0.66805	ILMN_28506	DKFZP564O0823	4	Homo sapiens DKFZP564O0823 protein (DKFZP564O0823), mRNA.		NM_015393.2
ILMN_1656563	PAX8	-1.41718	2	1.13097	0.423193	0	-2.9366	2	0.192898	0.503012	-0.000291313	2.07214	ILMN_137831	PAX8	2	Homo sapiens paired box 8 (PAX8), transcript variant PAX8A, mRNA.		NM_003466.3
ILMN_1656576	ATCAY	5.7028	2	1.539	0.14006	0	1.97364	2	6.55436	0.233434	-0.000291313	0.346084	ILMN_27014	ATCAY	19	Homo sapiens ataxia, cerebellar, Cayman type (caytaxin) (ATCAY), mRNA.	CLAC; BNIP-H; KIAA1872	NM_033064.3
ILMN_1656577	KCNH7	-2.37297	2	1.10776	0.49247	0	-2.36983	2	4.05427	0.460843	0.000291313	0.998675	ILMN_25757	KCNH7	2	Homo sapiens potassium voltage-gated channel, subfamily H (eag-related), member 7 (KCNH7), transcript variant 2, mRNA.	ERG3; Kv11.3; HERG3; MGC45986	NM_173162.1
ILMN_1656593	AK5	1.3045	2	1.15583	0.26506	0	0.00465404	2	2.92615	0.319277	-0.000291313	0.00356769	ILMN_14377	AK5	1	Homo sapiens adenylate kinase 5 (AK5), transcript variant 1, mRNA.	AK6; MGC33326	NM_174858.1
ILMN_1656595	STAC3	7.86994	2	0.564048	0.111446	0	13.4857	2	5.34312	0.0527108	0.000291313	1.71357	ILMN_15255	STAC3	12	Homo sapiens SH3 and cysteine rich domain 3 (STAC3), mRNA.	MGC2793	NM_145064.1
ILMN_1656617	LOC387856	9.68797	2	1.5277	0.0858434	0	17.3895	2	4.80412	0.0391566	0.000291313	1.79496	ILMN_30286	LOC387856	12	Homo sapiens similar to expressed sequence AI836003 (LOC387856), mRNA.		NM_001013635.2
ILMN_1656621	CHMP2A	308.721	2	40.5964	0	0	227.677	2	3.99961	0	-9.25519	0.737482	ILMN_1695	CHMP2A	19	Homo sapiens chromatin modifying protein 2A (CHMP2A), transcript variant 1, mRNA.	VPS2; VPS2A; CHMP2; BC-2; BC2	NM_014453.2
ILMN_1656625	RPS24	8397.49	2	1615.9	0	0	8915.61	2	622.957	0	0.000291313	1.0617	ILMN_1867	RPS24	10	Homo sapiens ribosomal protein S24 (RPS24), transcript variant 1, mRNA.	DKFZp686N1586; DBA3	NM_033022.2
ILMN_1656628	WDR4	1412.61	2	21.3804	0	0	768.169	2	2.15204	0	-63.5296	0.543793	ILMN_3481	WDR4	21	Homo sapiens WD repeat domain 4 (WDR4), transcript variant 2, mRNA.	TRM82	NM_033661.3
ILMN_1656638	BHMT	-8.91369	2	2.89577	0.942771	0	-9.23161	2	2.64656	0.942771	-0.000291313	1.03567	ILMN_19476	BHMT	5	Homo sapiens betaine-homocysteine methyltransferase (BHMT), mRNA.		NM_001713.1
ILMN_1656656	COX19	217.812	2	43.1671	0	0	291.318	2	29.8115	0	4.63389	1.33748	ILMN_15655	COX19	7	Homo sapiens COX19 cytochrome c oxidase assembly homolog (S. cerevisiae) (COX19), mRNA.	MGC104475	NM_001031617.2
ILMN_1656670	HLA-G	187.096	2	14.5974	0	0	195.361	2	7.41745	0	0.000291313	1.04417	ILMN_1631	HLA-G	6	Homo sapiens HLA-G histocompatibility antigen, class I, G (HLA-G), mRNA.	MHC-G	NM_002127.3
ILMN_1656676	ZYG11B	562.024	2	27.7378	0	0	735.692	2	33.4812	0	16.9869	1.30901	ILMN_16610	ZYG11B	1	Homo sapiens zyg-11 homolog B (C. elegans) (ZYG11B), mRNA.	FLJ13456; ZYG11	NM_024646.1
ILMN_1656682	AZIN1	5435.75	2	40.4932	0	0	4283.73	2	288.94	0	-10.251	0.788066	ILMN_4825	AZIN1	8	Homo sapiens antizyme inhibitor 1 (AZIN1), transcript variant 1, mRNA.	ODC1L; OAZIN; OAZI; MGC3832; MGC691	NM_015878.4
ILMN_1656684	CCR3	-5.29327	2	2.6401	0.73494	0	-2.15865	2	0.0607289	0.445783	0.000291313	0.40781	ILMN_27081	CCR3	3	Homo sapiens chemokine (C-C motif) receptor 3 (CCR3), transcript variant 1, mRNA.	CKR3; CMKBR3; MGC102841; CC-CKR-3; CD193	NM_001837.2
ILMN_1656691	FBXO4	246.418	2	29.3007	0	0	189.444	2	29.2039	0	-4.03123	0.76879	ILMN_7376	FBXO4	5	Homo sapiens F-box protein 4 (FBXO4), transcript variant 1, mRNA.	DKFZp547N213; FBX4; FLJ10141	NM_012176.2
ILMN_1656706	LCE2D	-1.62746	2	0.713596	0.430723	0	-3.16841	2	0.135543	0.52259	-0.000291313	1.94684	ILMN_11673	LCE2D	1	Homo sapiens late cornified envelope 2D (LCE2D), mRNA.	SPRL1A; LEP12	NM_178430.2
ILMN_1656718	DEF8	549.853	2	135.429	0	0	398.909	2	8.33849	0	-2.49577	0.725484	ILMN_2786	DEF8	16	Homo sapiens differentially expressed in FDCP 8 homolog (mouse) (DEF8), transcript variant 2, mRNA.	FLJ20186; MGC104349	NM_017702.2
ILMN_1656724	OR14A16	-1.97104	2	0.652235	0.462349	0	-3.59158	2	0.303488	0.569277	-0.000291313	1.82217	ILMN_28479	OR14A16	1	Homo sapiens olfactory receptor, family 14, subfamily A, member 16 (OR14A16), mRNA.		NM_001001966.1
ILMN_1656761	TGIF1	10.6491	2	9.55525	0.0692771	0	19.1147	2	2.17631	0.0331325	0.000291313	1.79496	ILMN_28395	TGIF1	18	Homo sapiens TGFB-induced factor homeobox 1 (TGIF1), transcript variant 5, mRNA.	HPE4; MGC5066; MGC39747; TGIF	NM_173209.1
ILMN_1656792	FLYWCH1	29.4681	2	1.37239	0.0195783	0	41.054	2	0.0597662	0.0165663	0.000291313	1.39317	ILMN_18604	FLYWCH1	16	Homo sapiens FLYWCH-type zinc finger 1 (FLYWCH1), transcript variant 2, mRNA.		NM_020912.1
ILMN_1656798	TIMM17A	144.173	2	30.2394	0	0	149.333	2	12.7951	0.00150602	0.000291313	1.03579	ILMN_16007	TIMM17A	1	Homo sapiens translocase of inner mitochondrial membrane 17 homolog A (yeast) (TIMM17A), nuclear gene encoding mitochondrial protein, mRNA.	TIM17A; TIM17	NM_006335.1
ILMN_1656802	LOXL2	-5.42322	2	1.76457	0.743976	0	-8.92599	2	0.0789128	0.935241	-0.000291313	1.64588	ILMN_22633	LOXL2	8	Homo sapiens lysyl oxidase-like 2 (LOXL2), mRNA.	LOR2; WS9-14	NM_002318.2
ILMN_1656807	RPL27	26185.7	2	435.549	0	0	23911.2	2	1711.56	0	-0.000291313	0.913143	ILMN_137655	RPL27	17	Homo sapiens ribosomal protein L27 (RPL27), mRNA.		NM_000988.3
ILMN_1656812	ITGB1BP3	-3.35042	2	2.28709	0.564759	0	-1.68144	2	3.58343	0.417169	0.000291313	0.501858	ILMN_15683	ITGB1BP3	19	Homo sapiens integrin beta 1 binding protein 3 (ITGB1BP3), mRNA.	MGC126624; MIBP; NRK2	NM_170678.2
ILMN_1656822	DNM2	487.379	2	62.2778	0	0	463.229	2	22.3456	0	-0.000291313	0.95045	ILMN_9878	DNM2	19	Homo sapiens dynamin 2 (DNM2), transcript variant 2, mRNA.	CMTDI1; CMTDIB; DYNII; DYN2; DI-CMTB	NM_001005361.1
ILMN_1656826	SH3RF1	371.851	2	9.96383	0	0	428.757	2	31.0964	0	2.13403	1.15303	ILMN_138185	SH3RF1	4	Homo sapiens SH3 domain containing ring finger 1 (SH3RF1), mRNA.	POSH; SH3MD2; FLJ21602; KIAA1494; RNF142	NM_020870.3
ILMN_1656837	RBP1	1440.47	2	283.717	0	0	803.344	2	37.6329	0	-16.6825	0.557694	ILMN_11289	RBP1	3	Homo sapiens retinol binding protein 1, cellular (RBP1), mRNA.	RBPC; CRBP1; CRBP; CRABP-I	NM_002899.2
ILMN_1656840	VPS13D	20.9218	2	7.08296	0.0301205	0	29.5385	2	3.15125	0.0240964	0.000291313	1.41185	ILMN_14155	VPS13D	1	Homo sapiens vacuolar protein sorting 13 homolog D (S. cerevisiae) (VPS13D), transcript variant 1, mRNA.	FLJ23066	NM_015378.2
ILMN_1656846	GBA2	-1.58794	2	1.08784	0.429217	0	-7.44881	2	4.01619	0.870482	-0.000291313	4.69087	ILMN_40319	GBA2	9	Homo sapiens glucosidase, beta (bile acid) 2 (GBA2), mRNA.	AD035; KIAA1605; MGC16895; DKFZp762K054	NM_020944.2
ILMN_1656849	SLC26A8	-1.86887	2	0.522103	0.453313	0	-5.99954	2	1.53584	0.771084	-0.000291313	3.21025	ILMN_20343	SLC26A8	6	Homo sapiens solute carrier family 26, member 8 (SLC26A8), transcript variant 1, mRNA.	TAT1; FLJ32714	NM_052961.2
ILMN_1656886	LIN37	60.2244	2	9.21348	0.00903614	0	74.0008	2	4.08352	0.0060241	0.000291313	1.22875	ILMN_11408	LIN37	19	Homo sapiens lin-37 homolog (C. elegans) (LIN37), mRNA.	ZK418.4; MGC9505; lin-37; F25965	NM_019104.1
ILMN_1656902	HECTD3	517.688	2	68.5834	0	0	689.115	2	4.05606	0	14.4387	1.33114	ILMN_24184	HECTD3	1	Homo sapiens HECT domain containing 3 (HECTD3), mRNA.	FLJ31983; RP11-69J16.1; FLJ21156; MGC161630	NM_024602.4
ILMN_1656904	SLC1A4	63.5998	2	15.9168	0.00903614	0	49.6534	2	8.18781	0.0150602	-0.000291313	0.780717	ILMN_12585	SLC1A4	2	Homo sapiens solute carrier family 1 (glutamate/neutral amino acid transporter), member 4 (SLC1A4), mRNA.	SATT; ASCT1	NM_003038.2
ILMN_1656910	TRIM6	7.52205	2	2.46948	0.114458	0	8.03554	2	4.6296	0.108434	0.000291313	1.06826	ILMN_24180	TRIM6	11	Homo sapiens tripartite motif-containing 6 (TRIM6), transcript variant 2, mRNA.	RNF89	NM_058166.3
ILMN_1656913	MDH1	7903.53	2	318.687	0	0	7567.69	2	226.903	0	-0.000291313	0.957508	ILMN_4304	MDH1	2	Homo sapiens malate dehydrogenase 1, NAD (soluble) (MDH1), mRNA.	MDH-s; MGC:1375; MOR2; MDHA	NM_005917.2
ILMN_1656915	PSD3	11.4567	2	1.5689	0.0677711	0	16.6387	2	1.73008	0.0421687	0.000291313	1.45231	ILMN_6113	PSD3	8	Homo sapiens pleckstrin and Sec7 domain containing 3 (PSD3), transcript variant 1, mRNA.	DKFZp761K1423; EFA6R; HCA67	NM_015310.3
ILMN_1656920	CRIP1	3920.82	2	750.295	0	0	2086.55	2	36.2341	0	-20.4073	0.532171	ILMN_15885	CRIP1	14	Homo sapiens cysteine-rich protein 1 (intestinal) (CRIP1), mRNA.	CRIP; CRHP; CRP1	NM_001311.3
ILMN_1656927	SEMA5A	7.29912	2	3.14915	0.115964	0	2.68905	2	0.0809552	0.206325	-0.000291313	0.368407	ILMN_8943	SEMA5A	5	Homo sapiens sema domain, seven thrombospondin repeats (type 1 and type 1-like), transmembrane domain (TM) and short cytoplasmic domain, (semaphorin) 5A (SEMA5A), mRNA.	semF; SEMAF	NM_003966.1
ILMN_1656934	REPS2	101.81	2	11.5446	0.00301205	0	187.081	2	20.8011	0	28.5715	1.83755	ILMN_137750	REPS2	X	Homo sapiens RALBP1 associated Eps domain containing 2 (REPS2), transcript variant 1, mRNA.	POB1	NM_004726.2
ILMN_1656940	ABLIM3	35.3787	2	4.19815	0.0165663	0	72.0111	2	13.9848	0.0060241	7.16352	2.03544	ILMN_12630	ABLIM3	5	Homo sapiens actin binding LIM protein family, member 3 (ABLIM3), mRNA.	HMFN1661	NM_014945.2
ILMN_1656942	PRICKLE3	5.31238	2	2.29914	0.144578	0	0.405861	2	7.83429	0.301205	-0.000291313	0.0763991	ILMN_12378	PRICKLE3	X	Homo sapiens prickle homolog 3 (Drosophila) (PRICKLE3), mRNA.	LMO6	NM_006150.3
ILMN_1656951	APCDD1	151.332	2	14.0546	0	0	69.7185	2	4.43995	0.0060241	-35.3029	0.460698	ILMN_21788	APCDD1	18	Homo sapiens adenomatosis polyposis coli down-regulated 1 (APCDD1), mRNA.	DRAPC1; B7323; FP7019	NM_153000.3
ILMN_1656955	PCDHGC3	-0.19207	2	0.612214	0.341867	0	-0.845421	2	3.96676	0.358434	-0.000291313	4.40162	ILMN_16486	PCDHGC3	5	Homo sapiens protocadherin gamma subfamily C, 3 (PCDHGC3), transcript variant 3, mRNA.	PCDH-GAMMA-C3; PC43; PCDH2	NM_032403.1
ILMN_1656977	HIBCH	1763.95	2	87.9071	0	0	1573.5	2	117.631	0	-0.825452	0.892033	ILMN_24767	HIBCH	2	Homo sapiens 3-hydroxyisobutyryl-Coenzyme A hydrolase (HIBCH), transcript variant 2, mRNA.	HIBYL-COA-H	NM_198047.1
ILMN_1656979	ABO	-3.23348	2	3.84985	0.548193	0	-4.76576	2	5.23842	0.679217	-0.000291313	1.47388	ILMN_29925	ABO	9	Homo sapiens ABO blood group (transferase A, alpha 1-3-N-acetylgalactosaminyltransferase; transferase B, alpha 1-3-galactosyltransferase) (ABO), mRNA.	NAGAT; GTB; A3GALT1; A3GALNT	NM_020469.2
ILMN_1656992	NLRP10	5.52808	2	0.162926	0.141566	0	10.4901	2	2.3813	0.0798193	0.000291313	1.8976	ILMN_139111	NLRP10	11	Homo sapiens NLR family, pyrin domain containing 10 (NLRP10), mRNA.	NOD8; PAN5; NALP10; PYNOD; CLR11.1	NM_176821.3
ILMN_1657009	NFASC	4.6757	2	0.310581	0.164157	0	5.40299	2	0.90207	0.146084	0.000291313	1.15555	ILMN_138485	NFASC	1	Homo sapiens neurofascin homolog (chicken) (NFASC), mRNA.	KIAA0756; NRCAML; DKFZp686P2250; FLJ46866; NF	NM_015090.2
ILMN_1657039	FILIP1	6.83225	2	0.756408	0.123494	0	4.90799	2	2.36928	0.158133	-0.000291313	0.718356	ILMN_17533	FILIP1	6	Homo sapiens filamin A interacting protein 1 (FILIP1), mRNA.	FILIP; KIAA1275	NM_015687.2
ILMN_1657044	STARD6	-6.3182	2	1.93545	0.804217	0	-6.02859	2	2.22435	0.775602	0.000291313	0.954163	ILMN_20727	STARD6	18	Homo sapiens StAR-related lipid transfer (START) domain containing 6 (STARD6), mRNA.		NM_139171.1
ILMN_1657045	ABR	2.2088	2	0.810752	0.237952	0	-0.589906	2	3.55542	0.349398	-0.000291313	-0.267071	ILMN_3288	ABR	17	Homo sapiens active BCR-related gene (ABR), transcript variant 1, mRNA.	MDB; FLJ45954	NM_021962.2
ILMN_1657050	ARSK	87.3167	2	3.01229	0.00451807	0	95.4642	2	20.739	0.00451807	0.000291313	1.09331	ILMN_19159	ARSK	5	Homo sapiens arylsulfatase K (ARSK), mRNA.	TSULF; DKFZp313G1735	NM_198150.1
ILMN_1657058	PPIL6	34.8588	2	3.42946	0.0165663	0	63.8984	2	19.2677	0.00903614	2.41227	1.83306	ILMN_23230	PPIL6	6	Homo sapiens peptidylprolyl isomerase (cyclophilin)-like 6 (PPIL6), mRNA.	bA425D10.6; MGC41939; dJ919F19.1	NM_173672.2
ILMN_1657064	C6orf70	190.764	2	18.2561	0	0	202.729	2	21.6981	0	0.000291313	1.06272	ILMN_23256	C6ORF70	6	Homo sapiens chromosome 6 open reading frame 70 (C6orf70), mRNA.	dJ266L20.3; FLJ11152	NM_018341.1
ILMN_1657077	SOCS6	42.5702	2	4.16786	0.0135542	0	60.1407	2	5.67621	0.00903614	0.921079	1.41274	ILMN_11869	SOCS6	18	Homo sapiens suppressor of cytokine signaling 6 (SOCS6), mRNA.	STATI4; SOCS4; SSI4; HSPC060; STAI4; CIS4	NM_004232.3
ILMN_1657087	ZNF533	-6.45861	2	4.04244	0.811747	0	-0.616786	2	2.18268	0.350904	0.000291313	0.0954982	ILMN_16766	ZNF533	2	Homo sapiens zinc finger protein 533 (ZNF533), mRNA.	FLJ25270	NM_152520.3
ILMN_1657095	STARD3	95.1815	2	4.75483	0.00451807	0	76.4943	2	3.9893	0.0060241	-0.563309	0.803667	ILMN_10258	STARD3	17	Homo sapiens StAR-related lipid transfer (START) domain containing 3 (STARD3), mRNA.	es64; FLJ41370; MLN64; CAB1	NM_006804.2
ILMN_1657128	PTPRU	74.7256	2	1.36954	0.00451807	0	63.3229	2	1.40976	0.00903614	-0.000291313	0.847406	ILMN_8207	PTPRU	1	Homo sapiens protein tyrosine phosphatase, receptor type, U (PTPRU), transcript variant 2, mRNA.	GLEPP1; hPTP-J; PTPPSI; PCP-2; FMI; PTP-PI; R-PTP-PSI; PTPRO; PTP; FLJ37530; PTPU2; PTP-J	NM_133177.2
ILMN_1657139	ADAT1	285.752	2	20.8232	0	0	279.199	2	28.5898	0	-0.000291313	0.977065	ILMN_1053	ADAT1	16	Homo sapiens adenosine deaminase, tRNA-specific 1 (ADAT1), mRNA.	HADAT1	NM_012091.2
ILMN_1657141	FMR1NB	-4.66742	2	0.245481	0.677711	0	-2.03962	2	3.49802	0.439759	0.000291313	0.436991	ILMN_9344	FMR1NB	X	Homo sapiens fragile X mental retardation 1 neighbor (FMR1NB), mRNA.	FLJ25736; NY-SAR-35	NM_152578.1
ILMN_1657144	C1orf69	59.9754	2	0.637558	0.00903614	0	59.9255	2	6.19463	0.00903614	-0.000291313	0.999168	ILMN_10199	C1ORF69	1	Homo sapiens chromosome 1 open reading frame 69 (C1orf69), mRNA.	FLJ12734; FLJ13849	NM_001010867.1
ILMN_1657145	MEOX1	2.23037	2	0.853248	0.237952	0	2.67739	2	4.12658	0.206325	0.000291313	1.20042	ILMN_137320	MEOX1	17	Homo sapiens mesenchyme homeobox 1 (MEOX1), transcript variant 3, mRNA.	MOX1	NM_001040002.1
ILMN_1657148	C19orf23	103.087	2	25.2035	0.00301205	0	88.2724	2	3.27018	0.00451807	-0.000291313	0.856291	ILMN_11822	C19ORF23	19	Homo sapiens chromosome 19 open reading frame 23 (C19orf23), mRNA.	MGC39338	NM_152480.1
ILMN_1657149	C8orf46	-5.17751	2	0.685514	0.724398	0	-3.32902	2	1.00446	0.537651	0.000291313	0.642977	ILMN_7220	C8ORF46	8	Homo sapiens chromosome 8 open reading frame 46 (C8orf46), mRNA.	MGC33510	NM_152765.2
ILMN_1657153	ACTR3	1382	2	186.229	0	0	1774.83	2	300.505	0	2.704	1.28425	ILMN_11792	ACTR3	2	Homo sapiens ARP3 actin-related protein 3 homolog (yeast) (ACTR3), mRNA.	ARP3	NM_005721.3
ILMN_1657158	RNF168	18.0485	2	7.42968	0.0361446	0	11.1302	2	0.983367	0.0753012	-0.000291313	0.616682	ILMN_728	RNF168	3	Homo sapiens ring finger protein 168 (RNF168), mRNA.	FLJ35794	NM_152617.2
ILMN_1657191	KRTAP10-5	10.7884	2	2.31372	0.0692771	0	20.1309	2	6.84867	0.0301205	0.000291313	1.86598	ILMN_17543	KRTAP10-5	21	Homo sapiens keratin associated protein 10-5 (KRTAP10-5), mRNA.	KRTAP18.5; KRTAP18.1; KAP18-5; KRTAP10.5; KRTAP18-5; KAP18.5; KAP10.5	NM_198694.2
ILMN_1657194	TSNAXIP1	6.46692	2	5.68661	0.131024	0	13.152	2	5.74118	0.0572289	0.000291313	2.03373	ILMN_17619	TSNAXIP1	16	Homo sapiens translin-associated factor X interacting protein 1 (TSNAXIP1), mRNA.	MGC111443; TXI1	NM_018430.2
ILMN_1657204	SAE1	8360.17	2	210.661	0	0	6322.37	2	42.7869	0	-15.4809	0.756249	ILMN_1993	SAE1	19	Homo sapiens SUMO1 activating enzyme subunit 1 (SAE1), mRNA.	SUA1; AOS1; HSPC140; FLJ3091	NM_005500.1
ILMN_1657234	CCL20	45.3829	2	3.37571	0.0120482	0	89.1676	2	11.1834	0.00451807	12.6692	1.96478	ILMN_1789	CCL20	2	Homo sapiens chemokine (C-C motif) ligand 20 (CCL20), mRNA.	SCYA20; MIP-3a; MIP3A; CKb4; LARC; ST38	NM_004591.1
ILMN_1657237	NUBP2	263.094	2	20.0852	0	0	198.602	2	8.24794	0	-9.20111	0.754869	ILMN_10701	NUBP2	16	Homo sapiens nucleotide binding protein 2 (MinD homolog, E. coli) (NUBP2), mRNA.	CFD1; NUBP1	NM_012225.1
ILMN_1657248	EREG	325.497	2	20.8679	0	0	374.475	2	50.2216	0	0.224434	1.15047	ILMN_17131	EREG	4	Homo sapiens epiregulin (EREG), mRNA.	ER	NM_001432.2
ILMN_1657254	SGCD	-0.149781	2	3.48598	0.337349	0	2.38549	2	2.24043	0.213855	0.000291313	-15.9266	ILMN_9959	SGCD	5	Homo sapiens sarcoglycan, delta (35kDa dystrophin-associated glycoprotein) (SGCD), transcript variant 2, mRNA.	SG-delta; SGCDP; CMD1L; MGC22567; 35DAG; SGD; DAGD	NM_172244.2
ILMN_1657283	ALKBH5	7953.39	2	547.047	0	0	8205.24	2	195.863	0	0.000291313	1.03167	ILMN_19293	ALKBH5	17	Homo sapiens alkB, alkylation repair homolog 5 (E. coli) (ALKBH5), mRNA.	OFOXD1; OFOXD; FLJ20308	NM_017758.3
ILMN_1657288	GUSBL2	68.6997	2	9.86042	0.00451807	0	77.1861	2	12.2746	0.0060241	0.000291313	1.12353	ILMN_4404	GUSBL2	6	Homo sapiens glucuronidase, beta-like 2 (GUSBL2), transcript variant 3, mRNA.	SMAC3L; FLJ13549; b55C20.2; SMA3-L; C6orf216	NM_206910.1
ILMN_1657295	CPA6	-5.31198	2	3.31408	0.736446	0	-5.60291	2	0.409412	0.733434	-0.000291313	1.05477	ILMN_26920	CPA6	8	Homo sapiens carboxypeptidase A6 (CPA6), mRNA.	CPAH	NM_020361.3
ILMN_1657302	SULT1A1	124.125	2	14.2778	0.00150602	0	90.0516	2	16.6448	0.00451807	-3.28553	0.725489	ILMN_29763	SULT1A1	16	Homo sapiens sulfotransferase family, cytosolic, 1A, phenol-preferring, member 1 (SULT1A1), transcript variant 5, mRNA.	HAST1/HAST2; MGC5163; P-PST; MGC131921; ST1A3; TSPST1; STP1; STP; PST	NM_177536.1
ILMN_1657312	CBWD2	-2.60835	2	6.76857	0.521084	0	-4.05516	2	1.67318	0.634036	-0.000291313	1.55468	ILMN_19422	CBWD2	2	Homo sapiens COBW domain containing 2 (CBWD2), mRNA.		NM_172003.2
ILMN_1657316	IGSF1	3.60981	2	0.683914	0.197289	0	2.34944	2	2.97545	0.215361	-0.000291313	0.65085	ILMN_2180	IGSF1	X	Homo sapiens immunoglobulin superfamily, member 1 (IGSF1), transcript variant 1, mRNA.	INHBP; MGC75490; PGSF2; KIAA0364; IGCD1; IGDC1	NM_001555.2
ILMN_1657317	POLR2J	231.015	2	43.0494	0	0	196.949	2	7.22738	0	-0.000291313	0.852535	ILMN_4217	POLR2J	7	Homo sapiens polymerase (RNA) II (DNA directed) polypeptide J, 13.3kDa (POLR2J), mRNA.	RPB11; MGC71910; hRPB14; RPB11m; RPB11A; POLR2J1	NM_006234.4
ILMN_1657332	CCDC85B	79.9962	2	5.00506	0.00451807	0	33.3294	2	4.29582	0.0210843	-16.2077	0.416637	ILMN_10120	CCDC85B	11	Homo sapiens coiled-coil domain containing 85B (CCDC85B), mRNA.	DIPA	NM_006848.2
ILMN_1657340	ZNF607	50.9243	2	9.15362	0.0105422	0	63.3357	2	0.918581	0.00903614	0.000291313	1.24372	ILMN_42496	ZNF607	19	Homo sapiens zinc finger protein 607 (ZNF607), mRNA.	MGC13071; FLJ14802	NM_032689.3
ILMN_1657344	PLAG1	0.463162	2	0.0213255	0.307229	0	3.2492	2	0.100524	0.188253	0.000291313	7.01525	ILMN_28528	PLAG1		PREDICTED: Homo sapiens pleiomorphic adenoma gene 1 (PLAG1), mRNA.		XM_001126483.1
ILMN_1657347	PODXL2	783.365	2	58.2193	0	0	565.208	2	6.62986	0	-19.042	0.721513	ILMN_26815	PODXL2	3	Homo sapiens podocalyxin-like 2 (PODXL2), mRNA.	PODLX2	NM_015720.1
ILMN_1657349	EPHA6	-4.84063	2	3.59308	0.686747	0	-5.27187	2	0.328187	0.715361	-0.000291313	1.08909	ILMN_34957	EPHA6	3	Homo sapiens EPH receptor A6 (EPHA6), transcript variant 2, mRNA.	PRO57066; EPA6; FLJ35246; DKFZp434C1418	NM_173655.2
ILMN_1657358	CD200R2	-5.40358	2	6.12217	0.748494	0	-3.73356	2	1.74612	0.588855	0.000291313	0.690942	ILMN_28054	CD200R2	3	Homo sapiens CD200 cell surface glycoprotein receptor 2 (CD200R2), mRNA.	CD200RLa	NM_001008784.2
ILMN_1657361	CBX7	292.262	2	51.1894	0	0	277.862	2	3.96966	0	-0.000291313	0.950728	ILMN_22413	CBX7	22	Homo sapiens chromobox homolog 7 (CBX7), mRNA.		NM_175709.2
ILMN_1657373	LEPREL1	7.37591	2	0.243639	0.115964	0	8.59986	2	1.17462	0.105422	0.000291313	1.16594	ILMN_11123	LEPREL1	3	Homo sapiens leprecan-like 1 (LEPREL1), mRNA.	FLJ10718; MLAT4; P3H2	NM_018192.2
ILMN_1657381	RASSF6	6.67875	2	6.21355	0.125	0	20.7767	2	3.35145	0.0301205	0.0427	3.11087	ILMN_15686	RASSF6	4	Homo sapiens Ras association (RalGDS/AF-6) domain family member 6 (RASSF6), transcript variant 1, mRNA.	DKFZp686K23225	NM_177532.3
ILMN_1657395	HMGCR	1559.05	2	45.2867	0	0	3839.9	2	21.4296	0	350.901	2.46297	ILMN_20713	HMGCR	5	Homo sapiens 3-hydroxy-3-methylglutaryl-Coenzyme A reductase (HMGCR), mRNA.		NM_000859.1
ILMN_1657398	LOC284757	-1.2322	2	4.05567	0.414157	0	0.731543	2	1.5313	0.286145	0.000291313	-0.593689	ILMN_13023	LOC284757	20	Homo sapiens hypothetical protein LOC284757 (LOC284757), mRNA.	FLJ46426	NM_001004305.1
ILMN_1657405	SPPL3	47.5159	2	5.56007	0.0105422	0	56.1209	2	5.50251	0.0105422	0.000291313	1.1811	ILMN_30223	SPPL3	12	Homo sapiens signal peptide peptidase 3 (SPPL3), mRNA.	PSL4; MDHV1887; MGC126674; IMP2; PRO4332; MGC126676; MGC90402; DKFZp586C1324	NM_139015.3
ILMN_1657406	NUP50	5.00443	2	5.50486	0.161145	0	1.85878	2	0.15874	0.24247	-0.000291313	0.371427	ILMN_138471	NUP50	22	Homo sapiens nucleoporin 50kDa (NUP50), transcript variant 2, mRNA.	DKFZP564A043; NPAP60; MGC39961; NPAP60L	NM_007172.2
ILMN_1657423	SPG21	590.614	2	186.495	0	0	927.261	2	90.4392	0	7.92811	1.56999	ILMN_137401	SPG21	15	Homo sapiens spastic paraplegia 21 (autosomal recessive, Mast syndrome) (SPG21), transcript variant 1, mRNA. XM_945612 XM_945613 XM_945615 XM_945617 XM_945619 XM_945622	ACP33; MAST; BM-019; GL010	NM_016630.3
ILMN_1657429	LOC57228	27.5315	2	0.00678304	0.0210843	0	25.7682	2	3.0702	0.0271084	-0.000291313	0.935954	ILMN_22631	LOC57228	12	Homo sapiens small trans-membrane and glycosylated protein (LOC57228), transcript variant 2, mRNA.	MGC149454; MGC149453	NM_001033873.1
ILMN_1657435	MT1M	224.728	2	63.658	0	0	350.548	2	33.9067	0	8.8818	1.55988	ILMN_25245	MT1M	16	Homo sapiens metallothionein 1M (MT1M), mRNA.	MGC118949; MGC40498; MT1; MT1K	NM_176870.2
ILMN_1657436	FGFR1OP2	325.825	2	37.3329	0	0	426.465	2	64.6476	0	4.48918	1.30888	ILMN_17139	FGFR1OP2	12	Homo sapiens FGFR1 oncogene partner 2 (FGFR1OP2), mRNA.	DKFZp564O1863; HSPC123-like	NM_015633.1
ILMN_1657442	ADARB1	4.16245	2	2.08057	0.182229	0	4.10235	2	0.475204	0.170181	-0.000291313	0.98556	ILMN_4112	ADARB1	21	Homo sapiens adenosine deaminase, RNA-specific, B1 (RED1 homolog rat) (ADARB1), transcript variant 4, mRNA.	ADAR2a; ADAR2; DRABA2; DRADA2; ADAR2a-L1; ADAR2a-L2; ADAR2g; ADAR2c; RED1; ADAR2a-L3; ADAR2b; ADAR2d	NM_001033049.1
ILMN_1657446	C1orf57	878.116	2	164.052	0	0	825.181	2	65.824	0	-0.000291313	0.939718	ILMN_24377	C1ORF57	1	Homo sapiens chromosome 1 open reading frame 57 (C1orf57), mRNA.	RP4-659I19.2; RP4-678E16.2; MGC13186; FLJ11383	NM_032324.1
ILMN_1657451	SRPK2	138.581	2	38.4667	0	0	268.465	2	14.6892	0	28.7523	1.93725	ILMN_29914	SRPK2	7	Homo sapiens SFRS protein kinase 2 (SRPK2), transcript variant 2, mRNA.	FLJ36101; SFRSK2	NM_182691.1
ILMN_1657455	CEACAM4	3.89436	2	1.0228	0.185241	0	3.93827	2	2.4566	0.170181	0.000291313	1.01128	ILMN_8917	CEACAM4	19	Homo sapiens carcinoembryonic antigen-related cell adhesion molecule 4 (CEACAM4), mRNA.	NCA; CGM7_HUMAN; CGM7	NM_001817.2
ILMN_1657470	YTHDF3	408.557	2	2.09296	0	0	527.582	2	35.7507	0	12.8194	1.29133	ILMN_15013	YTHDF3	8	Homo sapiens YTH domain family, member 3 (YTHDF3), mRNA.	FLJ31657	NM_152758.4
ILMN_1657475	GALT	263.339	2	39.405	0	0	349.207	2	13.3584	0	9.70909	1.32607	ILMN_1433	GALT	9	Homo sapiens galactose-1-phosphate uridylyltransferase (GALT), mRNA.		NM_000155.2
ILMN_1657483	SEC23B	2731.28	2	236.387	0	0	3499.45	2	87.938	0	16.0401	1.28125	ILMN_8434	SEC23B	20	Homo sapiens Sec23 homolog B (S. cerevisiae) (SEC23B), transcript variant 2, mRNA.		NM_032985.4
ILMN_1657486	OR2AG2	3.29948	2	1.53755	0.206325	0	1.86967	2	0.856754	0.240964	-0.000291313	0.566655	ILMN_12673	OR2AG2	11	Homo sapiens olfactory receptor, family 2, subfamily AG, member 2 (OR2AG2), mRNA.	OR2AG2P; OR11-76	NM_001004490.1
ILMN_1657495	KIAA0152	3833.46	2	304	0	0	2641.11	2	80.3673	0	-27.3403	0.688964	ILMN_24410	KIAA0152	12	Homo sapiens KIAA0152 (KIAA0152), mRNA.		NM_014730.2
ILMN_1657497	KIAA0319	6.24878	2	6.57621	0.131024	0	38.6265	2	3.5314	0.0180723	8.18825	6.18145	ILMN_19660	KIAA0319	6	Homo sapiens KIAA0319 (KIAA0319), mRNA.	DLX2; DYLX2; MGC176717; DYX2	NM_014809.3
ILMN_1657505	HR	34.3946	2	10.9066	0.0165663	0	32.0571	2	10.011	0.0210843	-0.000291313	0.93204	ILMN_7623	HR	8	Homo sapiens hairless homolog (mouse) (HR), transcript variant 2, mRNA.	AU; HSA277165; ALUNC	NM_018411.3
ILMN_1657509	TSEN54	311.384	2	30.0685	0	0	225.607	2	8.94277	0	-13.6847	0.724531	ILMN_8569	TSEN54	17	Homo sapiens tRNA splicing endonuclease 54 homolog (S. cerevisiae) (TSEN54), mRNA.	FLJ37147; SEN54L; sen54	NM_207346.2
ILMN_1657515	RPS6KA5	258.35	2	2.44596	0	0	285.207	2	11.7684	0	0.000291313	1.10396	ILMN_13156	RPS6KA5	14	Homo sapiens ribosomal protein S6 kinase, 90kDa, polypeptide 5 (RPS6KA5), transcript variant 1, mRNA.	RLPK; MSPK1; MGC1911; MSK1	NM_004755.2
ILMN_1657527	CLEC12B	8.64608	2	3.47279	0.10241	0	1.59893	2	0.627048	0.246988	-0.000291313	0.184932	ILMN_23058	CLEC12B	12	Homo sapiens C-type lectin domain family 12, member B (CLEC12B), mRNA.	UNQ5782	NM_205852.1
ILMN_1657547	CCDC34	2220.08	2	470.132	0	0	1858.08	2	145.777	0	-0.0920494	0.836944	ILMN_2645	CCDC34	11	Homo sapiens coiled-coil domain containing 34 (CCDC34), transcript variant 1, mRNA.	L15; NY-REN-41; RAMA3	NM_030771.1
ILMN_1657550	MVD	117.397	2	2.75236	0.00301205	0	628.75	2	24.0045	0	350.901	5.35575	ILMN_2771	MVD	16	Homo sapiens mevalonate (diphospho) decarboxylase (MVD), mRNA.	FP17780; MPD	NM_002461.1
ILMN_1657554	TSPYL2	163.125	2	28.876	0	0	214.579	2	21.9892	0	4.09708	1.31543	ILMN_26999	TSPYL2	X	Homo sapiens TSPY-like 2 (TSPYL2), mRNA.	CDA1; CTCL; HRIHFB2216; CINAP; SE20-4; DENTT	NM_022117.1
ILMN_1657571	ASNA1	19.3187	2	2.61024	0.0331325	0	13.5214	2	2.89724	0.0527108	-0.000291313	0.699911	ILMN_25830	ASNA1	19	Homo sapiens arsA arsenite transporter, ATP-binding, homolog 1 (bacterial) (ASNA1), mRNA.	MGC3821; ARSA1; ARSA-I	NM_004317.2
ILMN_1657591	SCN3A	6.7412	2	6.63669	0.126506	0	9.73213	2	1.28166	0.0873494	0.000291313	1.44368	ILMN_538	SCN3A	2	Homo sapiens sodium channel, voltage-gated, type III, alpha subunit (SCN3A), transcript variant 1, mRNA.	Nav1.3; KIAA1356; NAC3	NM_006922.3
ILMN_1657600	NCAPH	23.4688	2	1.25249	0.0256024	0	13.9859	2	4.43507	0.0512048	-0.000291313	0.595935	ILMN_139197	NCAPH	2	Homo sapiens non-SMC condensin I complex, subunit H (NCAPH), mRNA.	BRRN1; HCAP-H; CAP-H	NM_015341.3
ILMN_1657606	ZFHX4	-7.13852	2	0.0242419	0.861446	0	-7.39487	2	2.12586	0.870482	-0.000291313	1.03591	ILMN_21152	ZFHX4	8	Homo sapiens zinc finger homeobox 4 (ZFHX4), mRNA.	ZHF4; ZFH4; ZFH-4; FLJ20980; FLJ16514	NM_024721.3
ILMN_1657618	WTAP	5.16233	2	4.60564	0.14759	0	17.5932	2	12.1175	0.0391566	0.000291313	3.40799	ILMN_46899	WTAP	6	Homo sapiens Wilms tumor 1 associated protein (WTAP), transcript variant 2, mRNA.	KIAA0105; DKFZp686F20131; MGC3925	NM_152857.1
ILMN_1657624	NSFL1C	220.002	2	3.62832	0	0	573.536	2	15.763	0	350.901	2.60695	ILMN_20493	NSFL1C	20	Homo sapiens NSFL1 (p97) cofactor (p47) (NSFL1C), transcript variant 1, mRNA.	dJ776F14.1; UBX1; UBXD10; p47; MGC3347	NM_016143.3
ILMN_1657627	CBFA2T3	7.02407	2	0.749176	0.123494	0	5.73872	2	8.7167	0.143072	-0.000291313	0.817007	ILMN_11754	CBFA2T3	16	Homo sapiens core-binding factor, runt domain, alpha subunit 2; translocated to, 3 (CBFA2T3), transcript variant 1, mRNA.	ZMYND4; MTGR2; MTG16; ETO2	NM_005187.4
ILMN_1657631	STAP2	213.535	2	19.0516	0	0	223.506	2	3.93608	0	0.000291313	1.0467	ILMN_136955	STAP2	19	Homo sapiens signal transducing adaptor family member 2 (STAP2), transcript variant 1, mRNA.	BKS; FLJ20234	NM_017720.2
ILMN_1657634	FANCD2	14.4072	2	0.404469	0.0512048	0	6.08084	2	5.1307	0.135542	-0.000291313	0.42207	ILMN_12871	FANCD2	3	Homo sapiens Fanconi anemia, complementation group D2 (FANCD2), transcript variant 1, mRNA.	FACD; FA-D2; FA4; FANCD; DKFZp762A223; FLJ23826; FAD2; FAD	NM_033084.3
ILMN_1657639	EDEM3	0.709135	2	4.74308	0.298193	0	1.96771	2	6.11075	0.23494	0.000291313	2.7748	ILMN_31304	EDEM3	1	Homo sapiens ER degradation enhancer, mannosidase alpha-like 3 (EDEM3), mRNA.	C1orf22	NM_025191.2
ILMN_1657643	KCNIP2	7.49908	2	0.567609	0.114458	0	3.9479	2	1.27462	0.170181	-0.000291313	0.526451	ILMN_10989	KCNIP2	10	Homo sapiens Kv channel interacting protein 2 (KCNIP2), transcript variant 7, mRNA.	DKFZp566L1246; KCHIP2; MGC17241	NM_173197.2
ILMN_1657662	EXOD1	23.9579	2	3.10671	0.0256024	0	19.2782	2	3.30352	0.0316265	-0.000291313	0.804673	ILMN_1223	EXOD1	16	Homo sapiens exonuclease domain containing 1 (EXOD1), mRNA.	MGC16943; KIAA1504	NM_080663.1
ILMN_1657665	ZNF644	-1.34531	2	0.18067	0.417169	0	0.333697	2	4.24099	0.308735	0.000291313	-0.248045	ILMN_25954	ZNF644	1	Homo sapiens zinc finger protein 644 (ZNF644), transcript variant 2, mRNA.	BM-005; MGC70410; MGC60165; Zep-2; KIAA1221	NM_016620.2
ILMN_1657679	VAV3	10.4304	2	2.35514	0.0737952	0	11.1952	2	2.41779	0.0737952	0.000291313	1.07332	ILMN_22390	VAV3	1	Homo sapiens vav 3 guanine nucleotide exchange factor (VAV3), transcript variant 1, mRNA.	FLJ40431	NM_006113.4
ILMN_1657680	CCDC69	19.3167	2	2.77301	0.0331325	0	19.6198	2	1.57557	0.0316265	0.000291313	1.01569	ILMN_12667	CCDC69	5	Homo sapiens coiled-coil domain containing 69 (CCDC69), mRNA.	DKFZP434C171; FLJ13705	NM_015621.2
ILMN_1657682	GFM1	1398.25	2	182.443	0	0	1234.97	2	133.977	0	-0.00333021	0.883227	ILMN_9765	GFM1	3	Homo sapiens G elongation factor, mitochondrial 1 (GFM1), nuclear gene encoding mitochondrial protein, mRNA.	hEFG1; FLJ12662; EFG1; EFG; EGF1; FLJ13632; GFM; FLJ20773; EFGM; COXPD1	NM_024996.5
ILMN_1657683	C1orf198	543.67	2	0.639605	0	0	494.845	2	33.2598	0	-0.000291313	0.910195	ILMN_26304	C1ORF198	1	Homo sapiens chromosome 1 open reading frame 198 (C1orf198), mRNA.	FLJ14525; FLJ16283; DKFZp667D152; MGC10710; FLJ38847	NM_032800.1
ILMN_1657697	SAR1A	1244.4	2	12.2032	0	0	1411.6	2	42.8128	0	2.28165	1.13436	ILMN_17495	SAR1A	10	Homo sapiens SAR1 gene homolog A (S. cerevisiae) (SAR1A), mRNA.	SARA1; SAR1; Sara; masra2	NM_020150.3
ILMN_1657701	TMEM137	116.863	2	50.7739	0.00301205	0	159.089	2	15.8298	0	0.18274	1.36133	ILMN_5744	TMEM137		PREDICTED: Homo sapiens transmembrane protein 137 (TMEM137), misc RNA.		XR_017971.1
ILMN_1657708	MGLL	109.536	2	18.6192	0.00301205	0	276.874	2	28.564	0	72.9141	2.5277	ILMN_6273	MGLL	3	Homo sapiens monoglyceride lipase (MGLL), transcript variant 1, mRNA.	MGL; HU-K5	NM_007283.5
ILMN_1657709	TRIM34	-2.32569	2	0.179555	0.487952	0	-1.29949	2	0.571956	0.39006	0.000291313	0.558755	ILMN_29824	TRIM34	11	Homo sapiens tripartite motif-containing 34 (TRIM34), transcript variant 3, mRNA.	RNF21; IFP1	NM_130390.1
ILMN_1657729	ZNF254	86.8838	2	14.7266	0.00451807	0	55.327	2	6.41383	0.0105422	-4.4726	0.636793	ILMN_14608	ZNF254	19	Homo sapiens zinc finger protein 254 (ZNF254), mRNA.	ZNF91L; BMZF-5; HD-ZNF1; ZNF539	NM_203282.2
ILMN_1657744	C15orf17	345.259	2	7.59717	0	0	390.113	2	20.8602	0	1.17654	1.12991	ILMN_13536	C15ORF17	15	Homo sapiens chromosome 15 open reading frame 17 (C15orf17), mRNA.	FLJ00005	NM_020447.3
ILMN_1657746	BPHL	847.227	2	100.298	0	0	931.326	2	32.8337	0	0.0270105	1.09926	ILMN_27041	BPHL	6	Homo sapiens biphenyl hydrolase-like (serine hydrolase) (BPHL), mRNA.	MCNAA; MGC41865; Bph-rp; MGC125930	NM_004332.1
ILMN_1657749	CYP27C1	8.44107	2	3.40632	0.108434	0	11.7454	2	0.0672736	0.0692771	0.000291313	1.39146	ILMN_26559	CYP27C1	2	Homo sapiens cytochrome P450, family 27, subfamily C, polypeptide 1 (CYP27C1), mRNA.	FLJ16008	NM_001001665.2
ILMN_1657750	CNNM1	16.6114	2	4.3902	0.0436747	0	11.352	2	3.60595	0.0722891	-0.000291313	0.683386	ILMN_9103	CNNM1	10	Homo sapiens cyclin M1 (CNNM1), mRNA.	FLJ31632; ACDP1	NM_020348.1
ILMN_1657754	RPAP2	241.856	2	6.66557	0	0	341.032	2	9.61463	0	21.9666	1.41007	ILMN_23904	RPAP2	1	Homo sapiens RNA polymerase II associated protein 2 (RPAP2), mRNA.	C1orf82; FLJ13150; RP11-163M2.4	NM_024813.1
ILMN_1657760	SYT17	78.5224	2	0.7458	0.00451807	0	145.067	2	10.5516	0.00150602	29.0206	1.84746	ILMN_7354	SYT17	16	Homo sapiens synaptotagmin XVII (SYT17), mRNA.		NM_016524.2
ILMN_1657766	TRIM29	66.9153	2	22.299	0.0060241	0	291.415	2	31.665	0	108.999	4.35498	ILMN_6968	TRIM29	11	Homo sapiens tripartite motif-containing 29 (TRIM29), mRNA.	FLJ36085; ATDC	NM_012101.3
ILMN_1657769	EIF5	5.43763	2	7.04582	0.146084	0	6.08219	2	4.45109	0.135542	0.000291313	1.11854	ILMN_17164	EIF5	14	Homo sapiens eukaryotic translation initiation factor 5 (EIF5), transcript variant 2, mRNA.	EIF-5A	NM_183004.3
ILMN_1657771	CRTC2	69.8584	2	3.79763	0.00451807	0	65.0725	2	2.00888	0.00903614	-0.000291313	0.931492	ILMN_28825	CRTC2	1	Homo sapiens CREB regulated transcription coactivator 2 (CRTC2), mRNA.	RP11-422P24.6; TORC2	NM_181715.1
ILMN_1657790	SFRS11	657.303	2	83.7225	0	0	641.286	2	135.085	0	-0.000291313	0.975633	ILMN_4847	SFRS11	1	Homo sapiens splicing factor, arginine/serine-rich 11 (SFRS11), mRNA.	DKFZp686M13204; dJ677H15.2; p54	NM_004768.2
ILMN_1657796	STMN1	1972.12	2	26.408	0	0	850.33	2	60.117	0	-103.801	0.431175	ILMN_11775	STMN1	1	Homo sapiens stathmin 1/oncoprotein 18 (STMN1), transcript variant 1, mRNA.	SMN; PR22; PP17; OP18; LAP18; PP19; Lag	NM_203401.1
ILMN_1657797	FIBP	1896.85	2	48.6435	0	0	1352.79	2	26.6556	0	-22.1155	0.71318	ILMN_8066	FIBP	11	Homo sapiens fibroblast growth factor (acidic) intracellular binding protein (FIBP), transcript variant 2, mRNA.	FGFIBP; FIBP-1	NM_004214.4
ILMN_1657803	CFH	24.3024	2	3.92644	0.0256024	0	14.4243	2	12.7215	0.0512048	-0.000291313	0.593535	ILMN_12111	CFH	1	Homo sapiens complement factor H (CFH), transcript variant 2, mRNA.	HUS; MGC88246; HF1; FH; ARMD4; ARMS1; HF; CFHL3; FHL1; HF2	NM_001014975.1
ILMN_1657810	PPM1M	482.905	2	0.0049001	0	0	600.5	2	18.1356	0	9.66545	1.24352	ILMN_4690	PPM1M	3	Homo sapiens protein phosphatase 1M (PP2C domain containing) (PPM1M), mRNA.	PP2C-eta; FLJ32332; PP2CE; PP2Ceta	NM_144641.1
ILMN_1657818	IQCB1	11.0939	2	2.95358	0.0692771	0	20.3892	2	5.36531	0.0301205	0.000291313	1.83788	ILMN_10999	IQCB1	3	Homo sapiens IQ motif containing B1 (IQCB1), transcript variant 1, mRNA.	SLSN5; PIQ; NPHP5	NM_001023570.1
ILMN_1657823	PMEPA1	16.9975	2	3.31979	0.0421687	0	13.8332	2	0.417324	0.0512048	-0.000291313	0.813835	ILMN_14771	PMEPA1	20	Homo sapiens prostate transmembrane protein, androgen induced 1 (PMEPA1), transcript variant 1, mRNA.	STAG1; PMEPA1	NM_020182.3
ILMN_1657836	PLEKHG2	19.5514	2	3.9223	0.0331325	0	13.493	2	1.09269	0.0527108	-0.000291313	0.690132	ILMN_4000	PLEKHG2	19	Homo sapiens pleckstrin homology domain containing, family G (with RhoGef domain) member 2 (PLEKHG2), mRNA.	CLG; FLJ00018; FLJ22458	NM_022835.1
ILMN_1657837	ZC3H8	149.368	2	4.23215	0	0	225.1	2	0.646946	0	22.9352	1.50701	ILMN_22765	ZC3H8	2	Homo sapiens zinc finger CCCH-type containing 8 (ZC3H8), mRNA.	Fliz1; ZC3HDC8	NM_032494.1
ILMN_1657838	JMJD5	5.40784	2	2.45127	0.143072	0	1.84673	2	3.25221	0.24247	-0.000291313	0.341491	ILMN_23691	JMJD5	16	Homo sapiens jumonji domain containing 5 (JMJD5), mRNA.	FLJ13798	NM_024773.1
ILMN_1657847	SUNC1	-2.09129	2	4.32189	0.465361	0	-5.26292	2	0.646935	0.715361	-0.000291313	2.51659	ILMN_5330	SUNC1	7	Homo sapiens Sad1 and UNC84 domain containing 1 (SUNC1), transcript variant 1, mRNA.	MGC33329	NM_001030019.1
ILMN_1657854	MITF	-8.69474	2	4.70929	0.930723	0	-7.26685	2	3.61157	0.861446	0.000291313	0.835775	ILMN_1803	MITF	3	Homo sapiens microphthalmia-associated transcription factor (MITF), transcript variant 3, mRNA.	WS2A	NM_006722.1
ILMN_1657855	ACTL6B	-2.13332	2	2.23022	0.475904	0	-3.52938	2	2.76169	0.563253	-0.000291313	1.6544	ILMN_21260	ACTL6B	7	Homo sapiens actin-like 6B (ACTL6B), mRNA.	BAF53B; ACTL6	NM_016188.3
ILMN_1657862	AHCY	6320.76	2	404.55	0	0	4804.61	2	98.19	0	-14.8366	0.760131	ILMN_10724	AHCY	20	Homo sapiens S-adenosylhomocysteine hydrolase (AHCY), mRNA.	SAHH	NM_000687.1
ILMN_1657864	TMUB2	285.585	2	3.27714	0	0	321.88	2	33.7729	0	0.0396565	1.12709	ILMN_1757	TMUB2	17	Homo sapiens transmembrane and ubiquitin-like domain containing 2 (TMUB2), transcript variant 3, mRNA.	MGC3123; FP2653	NM_001076674.1
ILMN_1657868	SIRT4	80.5254	2	5.28569	0.00451807	0	108.635	2	2.40616	0.00301205	3.77292	1.34907	ILMN_1274	SIRT4	12	Homo sapiens sirtuin (silent mating type information regulation 2 homolog) 4 (S. cerevisiae) (SIRT4), mRNA.	MGC130047; MGC130046; MGC57437; SIR2L4; sirtuin 4	NM_012240.1
ILMN_1657870	ABL2	-4.10801	2	0.267143	0.625	0	-9.56058	2	3.87765	0.950301	-0.000291313	2.3273	ILMN_1881	ABL2	1	Homo sapiens v-abl Abelson murine leukemia viral oncogene homolog 2 (arg, Abelson-related gene) (ABL2), transcript variant a, mRNA.	FLJ31718; ABLL; ARG; FLJ22224; FLJ41441	NM_005158.3
ILMN_1657871	RSAD2	-0.276116	2	4.91607	0.341867	0	74.3859	2	3.11293	0.0060241	53.5829	-269.4	ILMN_138156	RSAD2	2	Homo sapiens radical S-adenosyl methionine domain containing 2 (RSAD2), mRNA.	vig1; cig33; 2510004L01Rik; cig5	NM_080657.4
ILMN_1657884	NME2	312.797	2	2.92311	0	0	230.042	2	41.204	0	-5.97143	0.735435	ILMN_16917	NME2	17	Homo sapiens non-metastatic cells 2, protein (NM23B) expressed in (NME2), transcript variant 1, mRNA.	MGC111212; NM23-H2; NM23B; puf; NDPKB; NDPK-B	NM_002512.2
ILMN_1657888	SALL1	-2.06348	2	3.27024	0.46988	0	-2.24919	2	4.24377	0.451807	-0.000291313	1.09	ILMN_4737	SALL1	16	Homo sapiens sal-like 1 (Drosophila) (SALL1), transcript variant 1, mRNA.	TBS; HSAL1; ZNF794	NM_002968.2
ILMN_1657891	TNKS	15.3482	2	6.89099	0.0496988	0	34.2467	2	16.7938	0.0195783	0.118283	2.23132	ILMN_138872	TNKS	8	Homo sapiens tankyrase, TRF1-interacting ankyrin-related ADP-ribose polymerase (TNKS), mRNA.	TIN1; PARP5A; PARPL; PARP-5a; TINF1; TNKS1	NM_003747.2
ILMN_1657892	TLR8	-6.95869	2	2.87413	0.850904	0	-11.1759	2	7.45848	0.987952	-0.000291313	1.60603	ILMN_18406	TLR8	X	Homo sapiens toll-like receptor 8 (TLR8), transcript variant 2, mRNA.	MGC119600; MGC119599	NM_138636.2
ILMN_1657893	TXNRD2	242.435	2	18.5678	0	0	267.849	2	13.1175	0	0.000291313	1.10483	ILMN_17461	TXNRD2	22	Homo sapiens thioredoxin reductase 2 (TXNRD2), nuclear gene encoding mitochondrial protein, mRNA.	TRXR2; TR; TR-BETA; TR3; SELZ	NM_006440.3
ILMN_1657898	MTP18	208.069	2	40.6121	0	0	138.99	2	1.69637	0.00150602	-6.64926	0.668001	ILMN_13393	MTP18	22	Homo sapiens mitochondrial protein 18 kDa (MTP18), nuclear gene encoding mitochondrial protein, transcript variant 1, mRNA.	HSPC242	NM_016498.3
ILMN_1657913	C1orf84	0.509102	2	0.206542	0.301205	0	2.35398	2	4.26746	0.213855	0.000291313	4.62379	ILMN_10202	C1ORF84	1	Homo sapiens chromosome 1 open reading frame 84 (C1orf84), transcript variant 1, mRNA.	FLJ34502; RP11-506B15.1	NM_001012960.1
ILMN_1657949	RHEB	3373.24	2	354.187	0	0	3670.51	2	50.8669	0	0.000291313	1.08813	ILMN_5824	RHEB	7	Homo sapiens Ras homolog enriched in brain (RHEB), mRNA.	RHEB2; MGC111559	NM_005614.3
ILMN_1657955	FMNL3	-2.07513	2	2.16472	0.468373	0	-0.452259	2	0.431342	0.341867	0.000291313	0.217942	ILMN_3539	FMNL3	12	Homo sapiens formin-like 3 (FMNL3), transcript variant 2, mRNA.	WBP3; FLJ45265; DKFZp762B245; FHOD3; MGC45819	NM_198900.2
ILMN_1657962	LOC728946	-6.59701	2	0.0565369	0.820783	0	-4.89891	2	2.41366	0.689759	0.000291313	0.742594	ILMN_8827	LOC728946	17	PREDICTED: Homo sapiens similar to keratin associated protein 1-1 (LOC728946), mRNA.		XM_001128870.1
ILMN_1657972	HHIPL1	-0.866333	2	2.25349	0.391566	0	2.07158	2	0.398394	0.224398	0.000291313	-2.39121	ILMN_2441	HHIPL1	14	Homo sapiens HHIP-like 1 (HHIPL1), mRNA.	UNQ9245; KIAA1822	NM_032425.3
ILMN_1657977	MSRB2	1349	2	64.9097	0	0	1755.74	2	76.0358	0	18.0057	1.30151	ILMN_1402	MSRB2	10	Homo sapiens methionine sulfoxide reductase B2 (MSRB2), mRNA.	PILB; CBS-1; MSRB; CGI-131; CBS1; MGC26104	NM_012228.2
ILMN_1657983	TERF2IP	868.569	2	15.7329	0	0	1075.53	2	15.363	0	10.3393	1.23827	ILMN_5664	TERF2IP	16	Homo sapiens telomeric repeat binding factor 2, interacting protein (TERF2IP), mRNA.	RAP1; DRIP5	NM_018975.2
ILMN_1657993	ADNP	908.74	2	2.95421	0	0	861.499	2	26.8162	0	-0.000291313	0.948014	ILMN_19803	ADNP	20	Homo sapiens activity-dependent neuroprotector homeobox (ADNP), transcript variant 2, mRNA.	ADNP1; KIAA0784	NM_181442.1
ILMN_1658015	MBNL2	515.971	2	51.0025	0	0	949.198	2	110.41	0	44.9693	1.83964	ILMN_5842	MBNL2	13	Homo sapiens muscleblind-like 2 (Drosophila) (MBNL2), transcript variant 1, mRNA.	MGC120628; MBLL39; MGC120626; MBLL; RP11-128N14.1; DKFZp781H1296; PRO2032; MGC120625	NM_144778.2
ILMN_1658016	ZNF831	-12.3613	2	2.36877	0.998494	0	-5.98932	2	3.11488	0.77259	0.000291313	0.484522	ILMN_36264	ZNF831	20	Homo sapiens zinc finger protein 831 (ZNF831), mRNA.	dJ492J12.1	NM_178457.1
ILMN_1658017	SPN	0.238977	2	0.6526	0.316265	0	2.83983	2	7.06179	0.203313	0.000291313	11.8832	ILMN_18556	SPN	16	Homo sapiens sialophorin (leukosialin, CD43) (SPN), transcript variant 1, mRNA.	CD43; GPL115; LSN	NM_001030288.1
ILMN_1658027	RAD54L	262.073	2	46.7307	0	0	88.0131	2	14.11	0.00451807	-41.8308	0.335835	ILMN_1278	RAD54L	1	Homo sapiens RAD54-like (S. cerevisiae) (RAD54L), mRNA.	HR54; hRAD54; RAD54A; hHR54	NM_003579.2
ILMN_1658040	CRABP1	-2.66842	2	2.60242	0.518072	0	-6.12158	2	1.05312	0.78012	-0.000291313	2.29409	ILMN_12739	CRABP1	15	Homo sapiens cellular retinoic acid binding protein 1 (CRABP1), mRNA.	RBP5; CRABPI; CRABP; CRABP-I	NM_004378.1
ILMN_1658071	ATP1B1	8109.84	2	182.03	0	0	5330.58	2	286.307	0	-34.5354	0.657298	ILMN_10855	ATP1B1	1	Homo sapiens ATPase, Na+/K+ transporting, beta 1 polypeptide (ATP1B1), transcript variant 1, mRNA.	MGC1798; ATP1B	NM_001677.3
ILMN_1658074	ZCCHC13	-1.11273	2	5.74221	0.411145	0	-2.2162	2	4.48515	0.448795	-0.000291313	1.99167	ILMN_25783	ZCCHC13	X	Homo sapiens zinc finger, CCHC domain containing 13 (ZCCHC13), mRNA.	Cnbp2; ZNF9L	NM_203303.2
ILMN_1658080	ZNF573	66.6733	2	1.56863	0.0060241	0	66.8151	2	9.22617	0.00753012	0.000291313	1.00213	ILMN_23003	ZNF573	19	Homo sapiens zinc finger protein 573 (ZNF573), mRNA.	FLJ30921	NM_152360.2
ILMN_1658081	FRMPD2	-1.0102	2	0.43824	0.402108	0	-0.368815	2	1.46042	0.335843	0.000291313	0.365092	ILMN_10968	FRMPD2	10	Homo sapiens FERM and PDZ domain containing 2 (FRMPD2), transcript variant 2, mRNA.	MGC35285; MGC87776; PDZK5C; PDZD5C; MGC90186; MGC87777	NM_001017929.2
ILMN_1658083	ABT1	87.3023	2	3.25042	0.00451807	0	96.5159	2	1.13772	0.00301205	0.000291313	1.10554	ILMN_11701	ABT1	6	Homo sapiens activator of basal transcription 1 (ABT1), mRNA.	hABT1	NM_013375.2
ILMN_1658094	ZNF365	7.08775	2	4.44712	0.123494	0	22.2729	2	6.38157	0.0286145	0.317655	3.14246	ILMN_12691	ZNF365	10	Homo sapiens zinc finger protein 365 (ZNF365), transcript variant A, mRNA.	MGC87345; KIAA0844; MGC41821; UAN; ZNF365D; Su48	NM_014951.2
ILMN_1658110	C18orf19	103.258	2	14.3754	0.00301205	0	216.531	2	33.3113	0	28.3673	2.097	ILMN_17843	C18ORF19	18	Homo sapiens chromosome 18 open reading frame 19 (C18orf19), mRNA.	HsT2329; MGC24180	NM_152352.1
ILMN_1658121	CFP	-5.14803	2	7.15634	0.707831	0	1.27877	2	1.48902	0.25753	0.000291313	-0.248399	ILMN_24742	CFP	X	Homo sapiens complement factor properdin (CFP), mRNA.	PFC; BFD; PROPERDIN; PFD	NM_002621.1
ILMN_1658123	DAZ2	1.3623	2	3.94962	0.268072	0	0.184439	2	2.47606	0.317771	-0.000291313	0.135389	ILMN_7491	DAZ2	Y	Homo sapiens deleted in azoospermia 2 (DAZ2), transcript variant 2, mRNA.	MGC126442; pDP1678	NM_001005785.1
ILMN_1658143	RFC3	371.432	2	49.8906	0	0	193.583	2	19.6615	0	-36.5746	0.521181	ILMN_11846	RFC3	13	Homo sapiens replication factor C (activator 1) 3, 38kDa (RFC3), transcript variant 1, mRNA.	RFC38; MGC5276	NM_002915.3
ILMN_1658144	TRIP11	519.541	2	22.6015	0	0	655.034	2	79.7732	0	4.98983	1.26079	ILMN_402	TRIP11	14	Homo sapiens thyroid hormone receptor interactor 11 (TRIP11), mRNA.	TRIP230; GMAP-210; CEV14	NM_004239.1
ILMN_1658152	MAP3K10	15.8962	2	0.839004	0.0466867	0	14.6177	2	2.43427	0.0512048	-0.000291313	0.91957	ILMN_24338	MAP3K10	19	Homo sapiens mitogen-activated protein kinase kinase kinase 10 (MAP3K10), mRNA.	MLK2; MST	NM_002446.2
ILMN_1658158	ZNF501	6.88821	2	6.9213	0.126506	0	2.84704	2	0.127641	0.203313	-0.000291313	0.413321	ILMN_138518	ZNF501	3	Homo sapiens zinc finger protein 501 (ZNF501), mRNA.	ZNF; MGC21738; ZNF52	NM_145044.2
ILMN_1658160	FAM156A	224.686	2	14.4369	0	0	240.564	2	0.424413	0	0.000291313	1.07067	ILMN_18863	FAM156A	X	Homo sapiens family with sequence similarity 156, member A (FAM156A), mRNA.	DKFZp686B22211; PRO0659	NM_014138.3
ILMN_1658163	NR4A3	-4.36929	2	5.17715	0.661145	0	-3.60481	2	8.98026	0.567771	0.000291313	0.825034	ILMN_26721	NR4A3	9	Homo sapiens nuclear receptor subfamily 4, group A, member 3 (NR4A3), transcript variant 2, mRNA.	CHN; CSMF; TEC; NOR1; MINOR	NM_173198.1
ILMN_1658173	ZNF418	15.2861	2	0.213341	0.0481928	0	13.1823	2	2.59069	0.0557229	-0.000291313	0.862372	ILMN_6197	ZNF418	19	Homo sapiens zinc finger protein 418 (ZNF418), mRNA.	MGC138449; KIAA1956; FLJ31551	NM_133460.1
ILMN_1658175	GGA1	22.4899	2	7.6421	0.0256024	0	17.8702	2	4.70374	0.0376506	-0.000291313	0.79459	ILMN_24947	GGA1	22	Homo sapiens golgi associated, gamma adaptin ear containing, ARF binding protein 1 (GGA1), transcript variant 1, mRNA.		NM_013365.3
ILMN_1658176	ABCG1	216.995	2	0.399461	0	0	185.469	2	0.448552	0	-1.39409	0.854716	ILMN_8619	ABCG1	21	Homo sapiens ATP-binding cassette, sub-family G (WHITE), member 1 (ABCG1), transcript variant 7, mRNA.	WHITE1; ABC8; MGC34313	NM_207629.1
ILMN_1658182	MEX3C	1012.56	2	135.024	0	0	1116.09	2	131.318	0	0.000291313	1.10225	ILMN_4296	MEX3C	18	Homo sapiens mex-3 homolog C (C. elegans) (MEX3C), mRNA.	BM-013; RKHD2; RNF194; MEX-3C; FLJ38871	NM_016626.3
ILMN_1658187	KIAA1026	-2.38084	2	4.46726	0.48494	0	-1.47967	2	3.81475	0.396084	0.000291313	0.621489	ILMN_13879	KIAA1026	1	Homo sapiens kazrin (KIAA1026), transcript variant N, mRNA.	RP1-21O18.1	NM_001018001.1
ILMN_1658206	C1orf102	25.8276	2	6.91684	0.0225904	0	46.0037	2	0.192116	0.0150602	1.91535	1.78118	ILMN_19554	C1ORF102	1	Homo sapiens chromosome 1 open reading frame 102 (C1orf102), transcript variant 1, mRNA.	NOR1; MGC26685; OSCP1	NM_145047.3
ILMN_1658207	MPFL	16.085	2	8.92371	0.0466867	0	17.6014	2	0.0186076	0.0391566	0.000291313	1.09427	ILMN_946	MPFL	16	Homo sapiens MPF-like (MPFL), mRNA.		NM_001025190.1
ILMN_1658210	C7orf60	-2.1989	2	5.53403	0.468373	0	-1.47595	2	4.26764	0.396084	0.000291313	0.671221	ILMN_32648	C7ORF60	7	Homo sapiens chromosome 7 open reading frame 60 (C7orf60), mRNA.		NM_152556.2
ILMN_1658214	DRD2	1.22643	2	0.592603	0.268072	0	-0.431347	2	2.99601	0.340361	-0.000291313	-0.351709	ILMN_27539	DRD2	11	Homo sapiens dopamine receptor D2 (DRD2), transcript variant 1, mRNA.	D2DR; D2R	NM_000795.2
ILMN_1658231	BTBD14B	30.0721	2	7.3584	0.0195783	0	23.3839	2	1.7509	0.0286145	-0.000291313	0.777595	ILMN_30328	BTBD14B	19	Homo sapiens BTB (POZ) domain containing 14B (BTBD14B), mRNA.	FLJ37383; NAC1	NM_052876.2
ILMN_1658232	FBXL10	9.9488	2	0.288	0.0783133	0	3.32208	2	1.45519	0.185241	-0.000291313	0.333917	ILMN_19365	FBXL10	12	Homo sapiens F-box and leucine-rich repeat protein 10 (FBXL10), transcript variant 1, mRNA.	CXXC2; Fbl10; JHDM1B; PCCX2	NM_032590.3
ILMN_1658237	KHDRBS2	-2.21909	2	1.24086	0.47741	0	-2.03666	2	1.99078	0.438253	0.000291313	0.917789	ILMN_23971	KHDRBS2	6	Homo sapiens KH domain containing, RNA binding, signal transduction associated 2 (KHDRBS2), mRNA.	SLM1; bA535F17.1; MGC26664; SLM-1; FLJ38664	NM_152688.1
ILMN_1658243	PSD3	35.0728	2	2.4574	0.0165663	0	42.2994	2	6.28585	0.0165663	0.000291313	1.20605	ILMN_6240	PSD3	8	Homo sapiens pleckstrin and Sec7 domain containing 3 (PSD3), transcript variant 2, mRNA.	DKFZp761K1423; EFA6R; HCA67	NM_206909.2
ILMN_1658247	OAS1	30.1347	2	3.34677	0.0195783	0	52.5892	2	0.958682	0.0120482	2.99485	1.74514	ILMN_2829	OAS1	12	Homo sapiens 2',5'-oligoadenylate synthetase 1, 40/46kDa (OAS1), transcript variant 2, mRNA.	OIAS; OIASI; IFI-4	NM_002534.2
ILMN_1658257	ABCB5	-2.55374	2	3.53975	0.493976	0	-3.82336	2	2.7201	0.600904	-0.000291313	1.49716	ILMN_28030	ABCB5	7	Homo sapiens ATP-binding cassette, sub-family B (MDR/TAP), member 5 (ABCB5), mRNA.	EST422562; ABCB5beta	NM_178559.3
ILMN_1658259	DRG1	1999.46	2	86.6816	0	0	1718.75	2	101.622	0	-3.37895	0.859608	ILMN_22955	DRG1	22	Homo sapiens developmentally regulated GTP binding protein 1 (DRG1), mRNA.	DKFZp434N1827; NEDD3	NM_004147.3
ILMN_1658261	MAPKBP1	18.496	2	7.07162	0.0346385	0	21.4757	2	9.24262	0.0301205	0.000291313	1.1611	ILMN_14955	MAPKBP1	15	Homo sapiens mitogen-activated protein kinase binding protein 1 (MAPKBP1), mRNA.	MGC138852; MGC138851	NM_014994.1
ILMN_1658271	LSS	51.0026	2	5.8678	0.0105422	0	68.3555	2	1.354	0.0060241	0.72115	1.34023	ILMN_12246	LSS	21	Homo sapiens lanosterol synthase (2,3-oxidosqualene-lanosterol cyclase) (LSS), transcript variant 1, mRNA.	OSC	NM_002340.3
ILMN_1658277	L3MBTL	4.26188	2	1.3099	0.180723	0	11.1368	2	6.35269	0.0737952	0.000291313	2.61312	ILMN_22845	L3MBTL	20	Homo sapiens l(3)mbt-like (Drosophila) (L3MBTL), transcript variant II, mRNA.	L3MBTL1; dJ138B7.3; FLJ41181; DKFZp586P1522; KIAA0681; H-L(3)MBT	NM_032107.3
ILMN_1658289	WDR54	1798.49	2	62.3168	0	0	1014.3	2	6.97949	0	-58.0441	0.563975	ILMN_24792	WDR54	2	Homo sapiens WD repeat domain 54 (WDR54), mRNA.	FLJ12953	NM_032118.2
ILMN_1658290	C16orf68	327.676	2	9.65245	0	0	341.837	2	30.615	0	0.000291313	1.04321	ILMN_12265	C16ORF68	16	Homo sapiens chromosome 16 open reading frame 68 (C16orf68), mRNA.	FLJ12433; MGC2654	NM_024109.2
ILMN_1658301	FAM83E	65.2997	2	1.95432	0.0060241	0	103.477	2	11.9266	0.00301205	8.08474	1.58465	ILMN_24874	FAM83E	19	Homo sapiens family with sequence similarity 83, member E (FAM83E), mRNA.	MGC138177; MGC138175; FLJ20200	NM_017708.3
ILMN_1658310	PCYT1A	12.5037	2	0.28655	0.060241	0	21.2959	2	0.173314	0.0301205	0.000291313	1.70317	ILMN_28083	PCYT1A	3	Homo sapiens phosphate cytidylyltransferase 1, choline, alpha (PCYT1A), mRNA.	CT; PCYT1; CTPCT	NM_005017.2
ILMN_1658327	BAZ1A	154.396	2	1.99012	0	0	121.007	2	17.3931	0.00301205	-2.40534	0.783743	ILMN_29236	BAZ1A	14	Homo sapiens bromodomain adjacent to zinc finger domain, 1A (BAZ1A), transcript variant 1, mRNA.	WALp1; hACF1; FLJ14383; DKFZP586E0518; ACF1; WCRF180	NM_013448.2
ILMN_1658333	ECM1	9.10252	2	4.77322	0.0948795	0	22.0491	2	1.39702	0.0301205	0.000291313	2.42231	ILMN_6103	ECM1	1	Homo sapiens extracellular matrix protein 1 (ECM1), transcript variant 1, mRNA.		NM_004425.2
ILMN_1658337	AKIRIN1	266.204	2	112.688	0	0	428.391	2	67.4477	0	3.6593	1.60926	ILMN_138824	AKIRIN1	1	Homo sapiens akirin 1 (AKIRIN1), mRNA.	STRF2; FLJ12666; RP11-781D11.2	NM_024595.1
ILMN_1658351	FIS1	1154.35	2	400.827	0	0	886.528	2	13.1066	0	-0.000291313	0.767988	ILMN_13135	FIS1	7	Homo sapiens fission 1 (mitochondrial outer membrane) homolog (S. cerevisiae) (FIS1), nuclear gene encoding mitochondrial protein, mRNA.	TTC11; CGI-135	NM_016068.2
ILMN_1658356	DKFZP586H2123	69.5634	2	5.65579	0.00451807	0	80.809	2	1.90576	0.0060241	0.000291313	1.16166	ILMN_13049	DKFZP586H2123	11	Homo sapiens regeneration associated muscle protease (DKFZP586H2123), transcript variant 1, mRNA.	RAMP; FP938	NM_015430.2
ILMN_1658369	TACR3	5.79053	2	0.0831966	0.138554	0	8.05836	2	2.09081	0.108434	0.000291313	1.39164	ILMN_19640	TACR3	4	Homo sapiens tachykinin receptor 3 (TACR3), mRNA.	TAC3RL; MGC148061; MGC148060; NK3R	NM_001059.1
ILMN_1658373	PAN2	282.063	2	6.77624	0	0	293.205	2	26.3053	0	0.000291313	1.0395	ILMN_661	PAN2	12	Homo sapiens PAN2 polyA specific ribonuclease subunit homolog (S. cerevisiae) (PAN2), mRNA.	PAN2; hPAN2; FLJ39360; KIAA0710; USP52	NM_014871.2
ILMN_1658376	CCDC114	-4.8112	2	3.46589	0.685241	0	-6.23195	2	1.88177	0.787651	-0.000291313	1.2953	ILMN_16523	CCDC114	19	Homo sapiens coiled-coil domain containing 114 (CCDC114), mRNA.	FLJ32926	NM_144577.1
ILMN_1658384	CRTAC1	-0.2928	2	0.979784	0.346386	0	-3.51459	2	4.18339	0.558735	-0.000291313	12.0034	ILMN_27995	CRTAC1	10	Homo sapiens cartilage acidic protein 1 (CRTAC1), mRNA.	ASPIC1; FLJ10320; CEP-68	NM_018058.4
ILMN_1658386	DAOA	0.900761	2	3.63475	0.290663	0	-3.19883	2	4.7987	0.525602	-0.000291313	-3.55125	ILMN_24597	DAOA	13	Homo sapiens D-amino acid oxidase activator (DAOA), mRNA.	SG72; LG72; G72	NM_172370.3
ILMN_1658396	SPEF2	-4.02191	2	5.1726	0.625	0	-0.310554	2	1.30392	0.332831	0.000291313	0.0772155	ILMN_26576	SPEF2	5	Homo sapiens sperm flagellar 2 (SPEF2), transcript variant 2, mRNA.	FLJ23164; MGC102842; FLJ23577; KIAA1770; KPL2; FLJ25395	NM_144722.3
ILMN_1658407	SLC43A3	253.235	2	2.00829	0	0	95.2836	2	21.3079	0.00451807	-59.3845	0.376266	ILMN_12210	SLC43A3	11	Homo sapiens solute carrier family 43, member 3 (SLC43A3), mRNA.	FOAP-13; EEG1; PRO1659; DKFZp762A227; SEEEG-1	NM_014096.2
ILMN_1658411	CHD4	1285.39	2	294.96	0	0	1316.35	2	30.7974	0	0.000291313	1.02408	ILMN_8213	CHD4	12	Homo sapiens chromodomain helicase DNA binding protein 4 (CHD4), mRNA.	Mi-2b; Mi2-BETA; DKFZp686E06161	NM_001273.2
ILMN_1658420	DSCAM	46.7633	2	4.4109	0.0120482	0	41.6312	2	7.09298	0.0165663	-0.000291313	0.890253	ILMN_8621	DSCAM	21	Homo sapiens Down syndrome cell adhesion molecule (DSCAM), transcript variant 1, mRNA.	CHD2-52; CHD2-42	NM_001389.3
ILMN_1658425	DAG1	1090.43	2	132.218	0	0	906.182	2	7.23698	0	-4.16583	0.831034	ILMN_16432	DAG1	3	Homo sapiens dystroglycan 1 (dystrophin-associated glycoprotein 1) (DAG1), mRNA.	AGRNR; 156DAG; A3a; DAG	NM_004393.2
ILMN_1658426	WNT10A	47.7612	2	24.5579	0.0105422	0	25.8557	2	6.78019	0.0271084	-0.000291313	0.541352	ILMN_12046	WNT10A	2	Homo sapiens wingless-type MMTV integration site family, member 10A (WNT10A), mRNA.	FLJ14301	NM_025216.2
ILMN_1658437	SFXN4	2633.05	2	20.0419	0	0	2341.09	2	147.149	0	-1.29446	0.889117	ILMN_1940	SFXN4	10	Homo sapiens sideroflexin 4 (SFXN4), mRNA.	BCRM1	NM_213649.1
ILMN_1658452	FAM53A	192.267	2	42.0002	0	0	156.178	2	2.71805	0.00150602	-0.26061	0.812298	ILMN_11044	FAM53A	4	Homo sapiens family with sequence similarity 53, member A (FAM53A), mRNA.	DNTNP	NM_001013622.2
ILMN_1658472	APH1A	1599	2	60.673	0	0	1468.96	2	25.0106	0	-0.000291313	0.918672	ILMN_24581	APH1A	1	Homo sapiens anterior pharynx defective 1 homolog A (C. elegans) (APH1A), transcript variant 1, mRNA.	APH-1A; CGI-78; 6530402N02Rik	NM_001077628.1
ILMN_1658483	IL1A	-2.50025	2	1.93331	0.501506	0	0.548191	2	5.33622	0.293675	0.000291313	-0.219255	ILMN_25320	IL1A	2	Homo sapiens interleukin 1, alpha (IL1A), mRNA.	IL1F1; IL1-ALPHA; IL1; IL-1A	NM_000575.3
ILMN_1658486	MRPL54	1069.37	2	473.041	0	0	582.712	2	34.2391	0	-2.02348	0.544911	ILMN_1467	MRPL54	19	Homo sapiens mitochondrial ribosomal protein L54 (MRPL54), nuclear gene encoding mitochondrial protein, mRNA.		NM_172251.1
ILMN_1658494	C13orf15	295.745	2	3.0512	0	0	214.333	2	17.3105	0	-12.594	0.724722	ILMN_14549	C13ORF15	13	Homo sapiens chromosome 13 open reading frame 15 (C13orf15), mRNA.	bA157L14.2; MGC87338; RGC-32; KIAA0564; RGC32	NM_014059.2
ILMN_1658498	SLC44A3	439.644	2	9.94425	0	0	485.429	2	6.10661	0	0.250868	1.10414	ILMN_9976	SLC44A3	1	Homo sapiens solute carrier family 44, member 3 (SLC44A3), mRNA.	CTL3; MGC45474	NM_152369.2
ILMN_1658499	SYT13	115.43	2	2.09767	0.00301205	0	172.004	2	20.492	0	10.812	1.49012	ILMN_28065	SYT13	11	Homo sapiens synaptotagmin XIII (SYT13), mRNA.	KIAA1427	NM_020826.1
ILMN_1658504	CHKA	679.426	2	89.7329	0	0	862.146	2	95.7776	0	5.19098	1.26893	ILMN_6979	CHKA	11	Homo sapiens choline kinase alpha (CHKA), transcript variant 2, mRNA.	CHK; CKI	NM_212469.1
ILMN_1658513	IQSEC2	56.9788	2	3.05938	0.00903614	0	66.3184	2	6.85977	0.00753012	0.000291313	1.16391	ILMN_23479	IQSEC2	X	Homo sapiens IQ motif and Sec7 domain 2 (IQSEC2), transcript variant 2, mRNA.	BRAG1; KIAA0522	NM_015075.1
ILMN_1658519	SLC13A3	27.2992	2	5.56958	0.0210843	0	40.256	2	11.6817	0.0165663	0.000291313	1.47463	ILMN_13280	SLC13A3	20	Homo sapiens solute carrier family 13 (sodium-dependent dicarboxylate transporter), member 3 (SLC13A3), transcript variant 1, mRNA.	SDCT2; NADC3	NM_022829.4
ILMN_1658526	RYK	692.283	2	18.0897	0	0	747.141	2	19.4378	0	0.000291313	1.07924	ILMN_138721	RYK	3	Homo sapiens RYK receptor-like tyrosine kinase (RYK), transcript variant 1, mRNA.	JTK5; RYK1; D3S3195; JTK5A	NM_001005861.2
ILMN_1658575	GALNT5	255.863	2	23.3658	0	0	390.017	2	53.4842	0	15.0515	1.52432	ILMN_18326	GALNT5	2	Homo sapiens UDP-N-acetyl-alpha-D-galactosamine:polypeptide N-acetylgalactosaminyltransferase 5 (GalNAc-T5) (GALNT5), mRNA.	MGC165041; GALNAC-T5	NM_014568.1
ILMN_1658576	PTPRN	-5.72596	2	3.36771	0.77259	0	-5.44559	2	3.70098	0.728916	0.000291313	0.951035	ILMN_15646	PTPRN	2	Homo sapiens protein tyrosine phosphatase, receptor type, N (PTPRN), mRNA.	R-PTP-N; IA-2/PTP; IA-2; ICA512; FLJ16131; IA2	NM_002846.2
ILMN_1658579	CDK5RAP3	39.7715	2	23.4255	0.0150602	0	55.2608	2	3.29941	0.0105422	0.000291313	1.38946	ILMN_11403	CDK5RAP3	17	Homo sapiens CDK5 regulatory subunit associated protein 3 (CDK5RAP3), transcript variant 1, mRNA.	HSF-27; OK/SW-cl.114; MST016; IC53; C53	NM_176095.1
ILMN_1658619	WWC1	929.596	2	1.57439	0	0	1005.88	2	64.4039	0	0.000291313	1.08207	ILMN_28835	WWC1	5	Homo sapiens WW and C2 domain containing 1 (WWC1), mRNA.	FLJ10865; KIAA0869; KIBRA; FLJ23369	NM_015238.1
ILMN_1658624	UBXN6	484.841	2	80.9	0	0	523.159	2	17.6573	0	0.000291313	1.07903	ILMN_10771	UBXN6	19	Homo sapiens UBX domain protein 6 (UBXN6), mRNA.	DKFZp667D109; UBXDC2	NM_025241.1
ILMN_1658626	RREB1	3.63777	2	7.73084	0.188253	0	2.44987	2	3.77596	0.210843	-0.000291313	0.673453	ILMN_12711	RREB1	6	Homo sapiens ras responsive element binding protein 1 (RREB1), transcript variant 2, mRNA.	FINB; RREB-1; LZ321; Zep-1	NM_002955.4
ILMN_1658632	NLRP7	7.4036	2	0.672034	0.115964	0	5.21885	2	1.72925	0.149096	-0.000291313	0.704907	ILMN_2155	NLRP7	19	Homo sapiens NLR family, pyrin domain containing 7 (NLRP7), transcript variant 2, mRNA.	MGC126470; PYPAF3; NALP7; HYDM; CLR19.4; PAN7; MGC126471; NOD12	NM_206828.2
ILMN_1658636	MRE11A	7.96891	2	0.738959	0.108434	0	4.94143	2	7.18178	0.158133	-0.000291313	0.620088	ILMN_6718	MRE11A	11	Homo sapiens MRE11 meiotic recombination 11 homolog A (S. cerevisiae) (MRE11A), transcript variant 2, mRNA.	MRE11B; MRE11; ATLD; HNGS1	NM_005590.3
ILMN_1658639	SLC46A3	252.038	2	7.61588	0	0	505.125	2	41.9573	0	86.0316	2.00416	ILMN_19722	SLC46A3	13	Homo sapiens solute carrier family 46, member 3 (SLC46A3), mRNA.	FLJ42613; RP11-97E23.2; FKSG16	NM_181785.2
ILMN_1658649	C3orf57	30.7641	2	2.01309	0.0195783	0	45.7432	2	5.3896	0.0150602	0.264541	1.4869	ILMN_28627	C3ORF57	3	Homo sapiens chromosome 3 open reading frame 57 (C3orf57), mRNA.	ADMP; MGC104229	NM_001040100.1
ILMN_1658660	ACTC1	-6.90465	2	4.48168	0.835843	0	-6.5691	2	4.32804	0.808735	0.000291313	0.951402	ILMN_19539	ACTC1	15	Homo sapiens actin, alpha, cardiac muscle 1 (ACTC1), mRNA.	ACTC; CMD1R	NM_005159.4
ILMN_1658675	CDH23	-1.27733	2	7.48646	0.409639	0	1.7255	2	0.738542	0.243976	0.000291313	-1.35087	ILMN_3999	CDH23	10	Homo sapiens cadherin-like 23 (CDH23), transcript variant 2, mRNA.	DKFZp434P2350; USH1H; KIAA1774; FLJ00233; MGC102761; FLJ36499; DFNB12; USH1D; KIAA1812	NM_052836.1
ILMN_1658677	DTX3	-4.21737	2	2.37033	0.637048	0	-3.37408	2	1.20156	0.551205	0.000291313	0.800043	ILMN_10045	DTX3	12	Homo sapiens deltex 3 homolog (Drosophila) (DTX3), mRNA.	FLJ34766; MGC138863; MGC138864; RNF154	NM_178502.2
ILMN_1658678	SAAL1	1652.21	2	37.3095	0	0	1167.17	2	78.3724	0	-22.3076	0.70643	ILMN_2421	SAAL1	11	Homo sapiens serum amyloid A-like 1 (SAAL1), mRNA.	FLJ41463	NM_138421.2
ILMN_1658679	YJEFN3	9.06992	2	9.0074	0.0948795	0	2.75986	2	0.351506	0.204819	-0.000291313	0.304287	ILMN_3913	YJEFN3	19	Homo sapiens YjeF N-terminal domain containing 3 (YJEFN3), mRNA.	MGC138490	NM_198537.2
ILMN_1658684	ATP9B	110.368	2	3.1443	0.00301205	0	143.605	2	2.06271	0.00150602	4.58952	1.30114	ILMN_8061	ATP9B	18	Homo sapiens ATPase, class II, type 9B (ATP9B), mRNA.	MGC150651; DKFZp686H2093; FLJ46612; ATPIIB; HUSSY-20; ATPASEP; MGC150650; NEO1L; MGC61572	NM_198531.3
ILMN_1658685	ELFN2	7.72816	2	5.25596	0.111446	0	4.32604	2	0.946862	0.164157	-0.000291313	0.559777	ILMN_12893	ELFN2	22	Homo sapiens extracellular leucine-rich repeat and fibronectin type III domain containing 2 (ELFN2), mRNA.	LRRC62; dJ63G5.3; KIAA1904	NM_052906.3
ILMN_1658695	NUF2	230.749	2	34.9165	0	0	93.1797	2	26.7933	0.00451807	-30.5423	0.403814	ILMN_16808	NUF2	1	Homo sapiens NUF2, NDC80 kinetochore complex component, homolog (S. cerevisiae) (NUF2), transcript variant 2, mRNA.	NUF2R; CDCA1	NM_031423.3
ILMN_1658702	HIST1H2BJ	411.606	2	29.9737	0	0	406.586	2	22.4593	0	-0.000291313	0.987804	ILMN_8652	HIST1H2BJ	6	Homo sapiens histone cluster 1, H2bj (HIST1H2BJ), mRNA.	H2B/r; H2BFR	NM_021058.3
ILMN_1658706	ST6GALNAC2	44.1517	2	2.56376	0.0120482	0	81.1947	2	3.32714	0.0060241	10.2905	1.83899	ILMN_15305	ST6GALNAC2	17	Homo sapiens ST6 (alpha-N-acetyl-neuraminyl-2,3-beta-galactosyl-1, 3)-N-acetylgalactosaminide alpha-2,6-sialyltransferase 2 (ST6GALNAC2), mRNA.	ST6GalNAII; SIAT7B; SIATL1; STHM; SIAT7	NM_006456.1
ILMN_1658710	FAM19A4	23.8159	2	2.79001	0.0256024	0	27.3813	2	1.81584	0.0271084	0.000291313	1.14971	ILMN_29743	FAM19A4	3	Homo sapiens family with sequence similarity 19 (chemokine (C-C motif)-like), member A4 (FAM19A4), transcript variant 2, mRNA.	FLJ25161; TAFA-4; TAFA4	NM_001005527.1
ILMN_1658713	TNFSF11	-7.79856	2	2.75102	0.90512	0	-9.19185	2	5.43482	0.942771	-0.000291313	1.17866	ILMN_1354	TNFSF11	13	Homo sapiens tumor necrosis factor (ligand) superfamily, member 11 (TNFSF11), transcript variant 2, mRNA.	RANKL; hRANKL2; sOdf; OPTB2; ODF; OPGL; CD254; TRANCE	NM_033012.2
ILMN_1658715	NRXN3	5.26436	2	3.33197	0.146084	0	12.2807	2	8.1534	0.064759	0.000291313	2.3328	ILMN_6393	NRXN3	14	Homo sapiens neurexin 3 (NRXN3), transcript variant beta, mRNA.	KIAA0743	NM_138970.2
ILMN_1658717	DEPDC5	116.369	2	12.0918	0.00301205	0	110.545	2	6.91806	0.00301205	-0.000291313	0.949955	ILMN_26199	DEPDC5	22	Homo sapiens DEP domain containing 5 (DEPDC5), transcript variant 1, mRNA.	DEP.5; DKFZp779P2027	NM_014662.2
ILMN_1658743	CCNDBP1	54.3369	2	2.39525	0.0105422	0	117.281	2	9.2028	0.00301205	30.4232	2.1584	ILMN_25745	CCNDBP1	15	Homo sapiens cyclin D-type binding-protein 1 (CCNDBP1), transcript variant 1, mRNA.	DIP1; GCIP	NM_012142.2
ILMN_1658758	NPB	83.6032	2	12.4895	0.00451807	0	41.672	2	9.4141	0.0165663	-9.75565	0.49845	ILMN_17465	NPB	17	Homo sapiens neuropeptide B (NPB), mRNA.	PPNPB; PPL7	NM_148896.2
ILMN_1658759	PEX19	500.548	2	6.48477	0	0	669.807	2	34.2894	0	19.9728	1.33815	ILMN_10966	PEX19	1	Homo sapiens peroxisomal biogenesis factor 19 (PEX19), mRNA.	HK33; PXMP1; D1S2223E; PXF; PMPI; PMP1	NM_002857.2
ILMN_1658773	PIGF	70.9757	2	9.51792	0.00451807	0	69.086	2	5.55516	0.0060241	-0.000291313	0.973376	ILMN_5303	PIGF	2	Homo sapiens phosphatidylinositol glycan anchor biosynthesis, class F (PIGF), transcript variant 2, mRNA.	MGC32646; MGC33136	NM_173074.2
ILMN_1658798	MEGF9	-0.863753	2	1.61792	0.391566	0	2.39495	2	5.2292	0.213855	0.000291313	-2.77273	ILMN_37703	MEGF9	9	Homo sapiens multiple EGF-like-domains 9 (MEGF9), mRNA.	EGFL5	NM_001080497.1
ILMN_1658800	BRPF3	503.661	2	18.1124	0	0	568.893	2	49.5321	0	0.81032	1.12952	ILMN_8164	BRPF3	6	Homo sapiens bromodomain and PHD finger containing, 3 (BRPF3), mRNA.		NM_015695.2
ILMN_1658802	KRTCAP2	5245.15	2	401.127	0	0	4053.97	2	155.67	0	-12.9368	0.772898	ILMN_11150	KRTCAP2	1	Homo sapiens keratinocyte associated protein 2 (KRTCAP2), mRNA.	KCP2	NM_173852.3
ILMN_1658805	BRE	6.64828	2	3.5813	0.126506	0	21.7144	2	7.23889	0.0301205	0.252402	3.26617	ILMN_15658	BRE	2	Homo sapiens brain and reproductive organ-expressed (TNFRSF1A modulator) (BRE), transcript variant 1, mRNA.	BRCC45; BRCC4	NM_004899.3
ILMN_1658806	SLC5A10	-0.344239	2	1.15983	0.349398	0	-5.13643	2	2.44142	0.710843	-0.000291313	14.9211	ILMN_29599	SLC5A10	17	Homo sapiens solute carrier family 5 (sodium/glucose cotransporter), member 10 (SLC5A10), transcript variant 1, mRNA.	FLJ25217; SGLT5	NM_152351.3
ILMN_1658807	HMOX2	13.5499	2	7.70527	0.0587349	0	19.1825	2	0.756806	0.0331325	0.000291313	1.41569	ILMN_19599	HMOX2	16	Homo sapiens heme oxygenase (decycling) 2 (HMOX2), mRNA.	HO-2	NM_002134.2
ILMN_1658809	SEZ6	1.78581	2	5.46416	0.243976	0	-3.45571	2	3.24213	0.558735	-0.000291313	-1.93509	ILMN_7974	SEZ6	17	Homo sapiens seizure related 6 homolog (mouse) (SEZ6), transcript variant 2, mRNA.		NM_001098635.1
ILMN_1658818	CAMK2D	9.90068	2	1.8967	0.0783133	0	17.4916	2	6.5944	0.0391566	0.000291313	1.76671	ILMN_19277	CAMK2D	4	Homo sapiens calcium/calmodulin-dependent protein kinase (CaM kinase) II delta (CAMK2D), transcript variant 3, mRNA.	MGC44911; CAMKD	NM_001221.2
ILMN_1658821	SAMD1	74.4324	2	16.6705	0.00451807	0	41.5884	2	4.03923	0.0165663	-4.49877	0.55874	ILMN_12112	SAMD1		Homo sapiens sterile alpha motif domain containing 1 (SAMD1), mRNA.		NM_138352.1
ILMN_1658830	C10orf26	153.688	2	8.64827	0	0	254.573	2	4.5926	0	39.4744	1.65643	ILMN_28562	C10ORF26	10	Homo sapiens chromosome 10 open reading frame 26 (C10orf26), transcript variant 1, mRNA.	MGC125648; FLJ20367; FLJ20154; OPAL1	NM_001083913.1
ILMN_1658834	ZC3H18	161.196	2	12.8027	0	0	119.524	2	1.76744	0.00301205	-6.41201	0.741478	ILMN_13925	ZC3H18	16	Homo sapiens zinc finger CCCH-type containing 18 (ZC3H18), mRNA.	FLJ34530; FLJ36075; FLJ22664; NHN1	NM_144604.2
ILMN_1658853	ARHGAP25	-2.55618	2	3.26886	0.496988	0	-3.49841	2	0.317602	0.558735	-0.000291313	1.36861	ILMN_1674	ARHGAP25	2	Homo sapiens Rho GTPase activating protein 25 (ARHGAP25), transcript variant 1, mRNA.	KAIA0053	NM_001007231.1
ILMN_1658883	ARAF	685.13	2	105.373	0	0	634.124	2	17.2767	0	-0.000291313	0.925553	ILMN_18073	ARAF	X	Homo sapiens v-raf murine sarcoma 3611 viral oncogene homolog (ARAF), mRNA.	ARAF1; PKS2; A-RAF; RAFA1	NM_001654.1
ILMN_1658885	DAGLB	485.765	2	39.8034	0	0	523.728	2	5.88276	0	0.000291313	1.07815	ILMN_1764	DAGLB	7	Homo sapiens diacylglycerol lipase, beta (DAGLB), mRNA.	FLJ33624; DAGLBETA; FLJ33909; KCCR13L	NM_139179.1
ILMN_1658917	SLC1A1	83.1483	2	10.3712	0.00451807	0	87.281	2	1.04866	0.00451807	0.000291313	1.0497	ILMN_14815	SLC1A1	9	Homo sapiens solute carrier family 1 (neuronal/epithelial high affinity glutamate transporter, system Xag), member 1 (SLC1A1), mRNA.	EAAC1; EAAT3	NM_004170.4
ILMN_1658920	MCTP1	-0.633049	2	0.961032	0.373494	0	3.05135	2	2.46867	0.194277	0.000291313	-4.82009	ILMN_2499	MCTP1	5	Homo sapiens multiple C2 domains, transmembrane 1 (MCTP1), transcript variant S, mRNA.	FLJ22344	NM_001002796.1
ILMN_1658925	JAG2	8.32745	2	0.886934	0.108434	0	10.1975	2	2.583	0.0813253	0.000291313	1.22456	ILMN_17025	JAG2	14	Homo sapiens jagged 2 (JAG2), transcript variant 1, mRNA.	HJ2	NM_002226.3
ILMN_1658926	NOTCH3	413.207	2	22.2405	0	0	376.103	2	30.0762	0	-0.000291313	0.910205	ILMN_12369	NOTCH3	19	Homo sapiens Notch homolog 3 (Drosophila) (NOTCH3), mRNA.	CASIL; CADASIL	NM_000435.1
ILMN_1658928	GNB2	308.835	2	35.867	0	0	247.263	2	7.94672	0	-5.56864	0.800631	ILMN_13034	GNB2	7	Homo sapiens guanine nucleotide binding protein (G protein), beta polypeptide 2 (GNB2), mRNA.		NM_005273.2
ILMN_1658951	PPP2R4	31.4426	2	1.66365	0.0180723	0	35.3737	2	3.28936	0.0195783	0.000291313	1.12502	ILMN_20930	PPP2R4	9	Homo sapiens protein phosphatase 2A activator, regulatory subunit 4 (PPP2R4), transcript variant 3, mRNA.	MGC2184; PR53; PTPA; PP2A	NM_021131.3
ILMN_1658955	EIF4E	2.77715	2	0.974521	0.218373	0	6.41638	2	1.24817	0.131024	0.000291313	2.31042	ILMN_31761	EIF4E	4	Homo sapiens eukaryotic translation initiation factor 4E (EIF4E), mRNA.	CBP; EIF4EL1; MGC111573; EIF4E1; EIF4F	NM_001968.2
ILMN_1658962	LCP2	11.7453	2	5.47343	0.0662651	0	9.41848	2	0.690766	0.0918675	-0.000291313	0.801894	ILMN_6971	LCP2	5	Homo sapiens lymphocyte cytosolic protein 2 (SH2 domain containing leukocyte protein of 76kDa) (LCP2), mRNA.	SLP76; SLP-76	NM_005565.3
ILMN_1658965	GABBR1	-3.22164	2	10.4438	0.540663	0	-1.81349	2	0.401919	0.424699	0.000291313	0.562908	ILMN_10864	GABBR1	6	Homo sapiens gamma-aminobutyric acid (GABA) B receptor, 1 (GABBR1), transcript variant 2, mRNA.	dJ271M21.1.1; dJ271M21.1.2; GPRC3A; GABBR1-3; GABAB(1e); hGB1a; GABABR1	NM_021903.1
ILMN_1658986	CREB5	-1.72209	2	1.44458	0.444277	0	-0.0229048	2	5.38493	0.319277	0.000291313	0.0133006	ILMN_19716	CREB5	7	Homo sapiens cAMP responsive element binding protein 5 (CREB5), transcript variant 2, mRNA.	CRE-BPA	NM_004904.2
ILMN_1658989	MEX3B	38.7157	2	11.6642	0.0150602	0	30.0169	2	8.76795	0.0225904	-0.000291313	0.775315	ILMN_29516	MEX3B	15	Homo sapiens mex-3 homolog B (C. elegans) (MEX3B), mRNA.	RNF195; DKFZp434J0617; MGC117199; MEX-3B; RKHD3	NM_032246.3
ILMN_1658995	ACOT9	460.191	2	31.5852	0	0	576.431	2	10.2348	0	10.361	1.25259	ILMN_138990	ACOT9	X	Homo sapiens acyl-CoA thioesterase 9 (ACOT9), transcript variant 2, mRNA.	MT-ACT48; CGI-16; ACATE2	NM_001033583.2
ILMN_1659013	NANOG	-8.32351	2	4.05603	0.924699	0	-10.1327	2	3.66172	0.96988	-0.000291313	1.21736	ILMN_4778	NANOG	12	Homo sapiens Nanog homeobox (NANOG), mRNA.		NM_024865.1
ILMN_1659017	C11orf74	376.605	2	25.1594	0	0	607.396	2	19.691	0	58.6024	1.61282	ILMN_16125	C11ORF74	11	Homo sapiens chromosome 11 open reading frame 74 (C11orf74), mRNA.	FLJ38678	NM_138787.2
ILMN_1659024	TMCC2	15.4667	2	4.25146	0.0466867	0	10.9914	2	2.70858	0.0798193	-0.000291313	0.710647	ILMN_28834	TMCC2	1	Homo sapiens transmembrane and coiled-coil domain family 2 (TMCC2), mRNA.	HUCEP11; FLJ38497; KIAA0481	NM_014858.2
ILMN_1659026	POLR2K	108.516	2	19.2988	0.00301205	0	96.1031	2	11.6271	0.00451807	-0.000291313	0.885613	ILMN_25505	POLR2K	8	Homo sapiens polymerase (RNA) II (DNA directed) polypeptide K, 7.0kDa (POLR2K), mRNA.	RPB7.0; RPB12; RPABC4; RPB10alpha; hRPB7.0; ABC10-alpha; hsRPB10a	NM_005034.3
ILMN_1659027	SLC2A1	1132.08	2	46.6644	0	0	1529.56	2	18.7612	0	24.3048	1.35111	ILMN_421	SLC2A1	1	Homo sapiens solute carrier family 2 (facilitated glucose transporter), member 1 (SLC2A1), mRNA.	MGC141896; GLUT1; MGC141895; GLUT	NM_006516.1
ILMN_1659029	FAM116B	224.211	2	48.4656	0	0	321.859	2	3.2317	0	9.61779	1.43552	ILMN_17332	FAM116B		Homo sapiens family with sequence similarity 116, member B (FAM116B), mRNA.	MGC33692	NM_001001794.2
ILMN_1659058	PPP1R10	463.49	2	21.4822	0	0	541.393	2	20.5362	0	3.66145	1.16808	ILMN_8464	PPP1R10	6	Homo sapiens protein phosphatase 1, regulatory (inhibitor) subunit 10 (PPP1R10), mRNA.	CAT53; FB19; PNUTS	NM_002714.2
ILMN_1659063	OR51G1	-1.53762	2	1.64421	0.429217	0	-2.1266	2	8.79345	0.445783	-0.000291313	1.38304	ILMN_13587	OR51G1	11	Homo sapiens olfactory receptor, family 51, subfamily G, member 1 (OR51G1), mRNA.	OR11-29; OR51G3P	NM_001005237.1
ILMN_1659072	SPP2	-4.04851	2	3.22517	0.606928	0	-6.0231	2	1.9856	0.774096	-0.000291313	1.48773	ILMN_6159	SPP2	2	Homo sapiens secreted phosphoprotein 2, 24kDa (SPP2), mRNA.	SPP24	NM_006944.2
ILMN_1659075	HLA-DOA	-6.60419	2	1.38759	0.820783	0	-10.7114	2	0.0546796	0.980422	-0.000291313	1.62191	ILMN_27857	HLA-DOA	6	Homo sapiens major histocompatibility complex, class II, DO alpha (HLA-DOA), mRNA.	HLA-DNA; HLADZ; HLA-DZA	NM_002119.3
ILMN_1659077	CD40LG	-6.01479	2	3.41355	0.78012	0	-4.50254	2	4.38506	0.667169	0.000291313	0.748578	ILMN_2685	CD40LG	X	Homo sapiens CD40 ligand (CD40LG), mRNA.	TRAP; IMD3; CD40L; IGM; TNFSF5; HIGM1; CD154; gp39; hCD40L; T-BAM	NM_000074.2
ILMN_1659079	C5orf25	0.244687	2	3.45683	0.319277	0	2.16914	2	1.69371	0.221386	0.000291313	8.86495	ILMN_31534	C5ORF25	5	Homo sapiens chromosome 5 open reading frame 25 (C5orf25), mRNA.	MGC33586; MGC90345; FLJ44216; MGC40402	NM_198567.2
ILMN_1659082	ZCRB1	119.603	2	20.9072	0.00150602	0	183.146	2	18.7777	0	11.8141	1.53128	ILMN_9760	ZCRB1	12	Homo sapiens zinc finger CCHC-type and RNA binding motif 1 (ZCRB1), mRNA.	RBM36; ZCCHC19; MADP-1; MGC26805; MADP1	NM_033114.3
ILMN_1659086	NEFL	-1.59909	2	7.05684	0.444277	0	-1.21299	2	2.96994	0.387048	0.000291313	0.75855	ILMN_22054	NEFL	8	Homo sapiens neurofilament, light polypeptide 68kDa (NEFL), mRNA.	NF68; CMT2E; NFL; CMT1F; NF-L	NM_006158.2
ILMN_1659103	PSMA8	-5.06685	2	4.42252	0.721386	0	-7.00125	2	4.54124	0.837349	-0.000291313	1.38178	ILMN_6461	PSMA8	18	Homo sapiens proteasome (prosome, macropain) subunit, alpha type, 8 (PSMA8), transcript variant 3, mRNA.	MGC26605; PSMA7L	NM_001025097.1
ILMN_1659106	PHLDA3	186.866	2	39.5738	0	0	234.6	2	13.2091	0	2.05495	1.25544	ILMN_24559	PHLDA3	1	Homo sapiens pleckstrin homology-like domain, family A, member 3 (PHLDA3), mRNA.	TIH1	NM_012396.3
ILMN_1659122	KLF10	13.2406	2	11.7062	0.060241	0	42.5108	2	11.8401	0.0165663	3.41542	3.21065	ILMN_2466	KLF10	8	Homo sapiens Kruppel-like factor 10 (KLF10), transcript variant 1, mRNA.	TIEG; EGRA; TIEG1	NM_005655.1
ILMN_1659138	CACNA1F	-3.26953	2	0.851562	0.555723	0	2.49401	2	5.78397	0.210843	0.000291313	-0.762803	ILMN_29802	CACNA1F	X	Homo sapiens calcium channel, voltage-dependent, L type, alpha 1F subunit (CACNA1F), mRNA.	CORDX3; Cav1.4; CSNB2A; CSNBX2; JMC8; CORDX; CSNB2; COD3; JM8	NM_005183.2
ILMN_1659142	MDK	59.4744	2	4.42938	0.00903614	0	49.0746	2	5.07666	0.0150602	-0.000291313	0.825139	ILMN_8627	MDK	11	Homo sapiens midkine (neurite growth-promoting factor 2) (MDK), transcript variant 2, mRNA.	FLJ27379; MK; NEGF2	NM_001012333.1
ILMN_1659148	ARL8A	9.61112	2	0.356326	0.0888554	0	5.32675	2	8.39581	0.149096	-0.000291313	0.554228	ILMN_5321	ARL8A	1	Homo sapiens ADP-ribosylation factor-like 8A (ARL8A), mRNA.	ARL10B; GIE2; FLJ45195	NM_138795.2
ILMN_1659156	ANKRD16	297.7	2	27.7182	0	0	228.578	2	14.2799	0	-8.71473	0.767814	ILMN_3845	ANKRD16	10	Homo sapiens ankyrin repeat domain 16 (ANKRD16), transcript variant 1, mRNA.		NM_019046.1
ILMN_1659166	SLC6A15	2.21592	2	0.265126	0.237952	0	-1.07587	2	1.70857	0.376506	-0.000291313	-0.485517	ILMN_13282	SLC6A15	12	Homo sapiens solute carrier family 6, member 15 (SLC6A15), transcript variant 1, mRNA.	FLJ10316; DKFZp761I0921; NTT73; hv7-3; MGC87066; V7-3	NM_182767.3
ILMN_1659189	C9orf89	781.558	2	116.887	0	0	825.063	2	4.55331	0	0.000291313	1.05566	ILMN_17058	C9ORF89	9	Homo sapiens chromosome 9 open reading frame 89 (C9orf89), mRNA.	MGC11115; BinCARD; MGC110898; bA370F5.1	NM_032310.3
ILMN_1659199	GRIN1	-5.86983	2	5.41603	0.781627	0	-3.36486	2	1.60991	0.549699	0.000291313	0.573247	ILMN_15757	GRIN1	9	Homo sapiens glutamate receptor, ionotropic, N-methyl D-aspartate 1 (GRIN1), transcript variant NR1-3, mRNA.	NMDAR1; NMDA1; NR1	NM_007327.2
ILMN_1659202	B3GALT1	13.662	2	2.87986	0.0527108	0	15.2111	2	6.70029	0.0481928	0.000291313	1.11339	ILMN_9785	B3GALT1	2	Homo sapiens UDP-Gal:betaGlcNAc beta 1,3-galactosyltransferase, polypeptide 1 (B3GALT1), mRNA.	beta3Gal-T1; MGC126594	NM_020981.2
ILMN_1659206	RARA	489.501	2	30.6266	0	0	527.715	2	26.423	0	0.000291313	1.07807	ILMN_29880	RARA	17	Homo sapiens retinoic acid receptor, alpha (RARA), transcript variant 1, mRNA.	NR1B1; RAR	NM_000964.2
ILMN_1659214	CTXN3	-5.87815	2	0.256828	0.775602	0	-5.66755	2	3.2262	0.745482	0.000291313	0.964172	ILMN_36332	CTXN3	5	Homo sapiens cortexin 3 (CTXN3), mRNA.	KABE	NM_001048252.1
ILMN_1659227	CD79A	-3.82825	2	1.41031	0.590361	0	-2.45596	2	0.271599	0.471386	0.000291313	0.641536	ILMN_137396	CD79A	19	Homo sapiens CD79a molecule, immunoglobulin-associated alpha (CD79A), transcript variant 1, mRNA.	MB-1; IGA	NM_001783.3
ILMN_1659230	KRTHA5	-6.65111	2	1.44153	0.829819	0	-6.57583	2	1.87696	0.808735	0.000291313	0.988682	ILMN_13369	KRTHA5	17	Homo sapiens keratin, hair, acidic, 5 (KRTHA5), mRNA.	HA5; hHa5; Ha-5	NM_002280.3
ILMN_1659240	MTMR14	1042.35	2	53.9647	0	0	1237.42	2	66.2647	0	5.90077	1.18714	ILMN_9449	MTMR14	3	Homo sapiens myotubularin related protein 14 (MTMR14), transcript variant 2, mRNA.	FLJ22405; FLJ90311; C3orf29; hEDTP	NM_001077525.1
ILMN_1659255	RP2	210.189	2	5.27166	0	0	372.716	2	10.8217	0	68.3177	1.77324	ILMN_28618	RP2	X	Homo sapiens retinitis pigmentosa 2 (X-linked recessive) (RP2), mRNA.	KIAA0215; TBCCD2	NM_006915.1
ILMN_1659257	TNFRSF8	3.11909	2	4.91039	0.210843	0	4.41788	2	5.39841	0.162651	0.000291313	1.4164	ILMN_21182	TNFRSF8	1	Homo sapiens tumor necrosis factor receptor superfamily, member 8 (TNFRSF8), transcript variant 2, mRNA.	CD30; KI-1; D1S166E	NM_152942.2
ILMN_1659259	PRPF6	131.781	2	33.1169	0	0	148.355	2	19.9694	0.00150602	0.000291313	1.12576	ILMN_18026	PRPF6	20	Homo sapiens PRP6 pre-mRNA processing factor 6 homolog (S. cerevisiae) (PRPF6), mRNA.	ANT-1; U5-102K; hPrp6; TOM; C20orf14	NM_012469.3
ILMN_1659270	OTP	15.2705	2	3.68622	0.0466867	0	17.5504	2	3.50061	0.0391566	0.000291313	1.1493	ILMN_4247	OTP	5	Homo sapiens orthopedia homeobox (OTP), mRNA.	MGC3161	NM_032109.2
ILMN_1659285	PSMG1	3014.37	2	153.524	0	0	2346.81	2	1.18073	0	-12.0555	0.77854	ILMN_13497	PSMG1	21	Homo sapiens proteasome (prosome, macropain) assembly chaperone 1 (PSMG1), transcript variant 2, mRNA.	C21LRP; PAC1; DSCR2; LRPC21	NM_203433.1
ILMN_1659290	PLEKHB2	-5.03511	2	1.11349	0.710843	0	-3.30708	2	0.11981	0.531627	0.000291313	0.656803	ILMN_8325	PLEKHB2	2	Homo sapiens pleckstrin homology domain containing, family B (evectins) member 2 (PLEKHB2), transcript variant 1, mRNA.	EVT2; FLJ20783	NM_001031706.1
ILMN_1659297	FZD6	425.119	2	90.3178	0	0	413.787	2	6.18234	0	-0.000291313	0.973346	ILMN_25538	FZD6	8	Homo sapiens frizzled homolog 6 (Drosophila) (FZD6), mRNA.	Hfz6	NM_003506.2
ILMN_1659306	SVIL	15.9904	2	0.491749	0.0466867	0	10.0927	2	3.58784	0.0813253	-0.000291313	0.63117	ILMN_15394	SVIL	10	Homo sapiens supervillin (SVIL), transcript variant 2, mRNA.	DKFZp686A17191	NM_021738.2
ILMN_1659312	PMP22	12.7655	2	0.1231	0.060241	0	22.5493	2	5.49809	0.0286145	0.000291313	1.76642	ILMN_21743	PMP22	17	Homo sapiens peripheral myelin protein 22 (PMP22), transcript variant 1, mRNA.	CMT1A; GAS-3; DSS; CMT1E; MGC20769; HMSNIA; HNPP; Sp110	NM_000304.2
ILMN_1659339	ELP4	255.004	2	5.71218	0	0	272.937	2	18.8278	0	0.000291313	1.07032	ILMN_20665	ELP4	11	Homo sapiens elongation protein 4 homolog (S. cerevisiae) (ELP4), mRNA.	C11orf19; PAX6NEB; FLJ20498; dJ68P15A.1; PAXNEB	NM_019040.3
ILMN_1659346	PPARA	-4.82666	2	1.84639	0.697289	0	-2.56403	2	4.23392	0.47741	0.000291313	0.531223	ILMN_138908	PPARA	22	Homo sapiens peroxisome proliferator-activated receptor alpha (PPARA), transcript variant 3, mRNA.	PPAR; hPPAR; MGC2452; NR1C1; MGC2237	NM_001001928.2
ILMN_1659350	CASP6	157.369	2	1.43206	0	0	189.26	2	10.273	0	2.5181	1.20264	ILMN_11674	CASP6	4	Homo sapiens caspase 6, apoptosis-related cysteine peptidase (CASP6), transcript variant alpha, mRNA.	MCH2	NM_001226.3
ILMN_1659352	KCNK13	26.5701	2	10.1401	0.0225904	0	22.2726	2	4.54267	0.0286145	-0.000291313	0.838261	ILMN_17624	KCNK13	14	Homo sapiens potassium channel, subfamily K, member 13 (KCNK13), mRNA.	THIK-1; THIK1; K2p13.1	NM_022054.2
ILMN_1659354	GH2	-3.17862	2	3.4046	0.546687	0	-1.54075	2	1.39627	0.403614	0.000291313	0.484723	ILMN_22062	GH2	17	Homo sapiens growth hormone 2 (GH2), transcript variant 3, mRNA.	GHV; GH-V; hGH-V; GHL	NM_022558.2
ILMN_1659359	SCUBE3	0.400623	2	1.2068	0.308735	0	0.662291	2	0.0261453	0.289157	0.000291313	1.65315	ILMN_844	SCUBE3	6	Homo sapiens signal peptide, CUB domain, EGF-like 3 (SCUBE3), mRNA.	DKFZp686B09105; DKFZp686D20108; FLJ34743; DKFZp686B1223; CEGF3	NM_152753.2
ILMN_1659364	RFC5	2900.73	2	217.836	0	0	1270.73	2	64.6286	0	-104.505	0.438071	ILMN_16612	RFC5	12	Homo sapiens replication factor C (activator 1) 5, 36.5kDa (RFC5), transcript variant 1, mRNA.	MGC1155; RFC36	NM_007370.3
ILMN_1659371	ADRA2A	22.5119	2	1.01911	0.0256024	0	23.4382	2	9.22124	0.0286145	0.000291313	1.04115	ILMN_23205	ADRA2A	10	Homo sapiens adrenergic, alpha-2A-, receptor (ADRA2A), mRNA.	ZNF32; ALPHA2AAR; ADRA2R; ADRA2; ADRAR	NM_000681.2
ILMN_1659378	TFAP2D	-2.96573	2	0.495508	0.533133	0	-2.97656	2	0.0997583	0.506024	-0.000291313	1.00365	ILMN_9513	TFAP2D	6	Homo sapiens transcription factor AP-2 delta (activating enhancer binding protein 2 delta) (TFAP2D), mRNA.	TFAP2BL1	NM_172238.3
ILMN_1659411	POLR2C	1805.97	2	477.225	0	0	1514.6	2	208.021	0	-0.000291313	0.83866	ILMN_137378	POLR2C	16	Homo sapiens polymerase (RNA) II (DNA directed) polypeptide C, 33kDa (POLR2C), mRNA.	RPB31; hsRPB3; RPB3; hRPB33	NM_032940.2
ILMN_1659415	MAP2K1IP1	1545.54	2	106.839	0	0	2258.98	2	134.532	0	41.8338	1.46161	ILMN_13073	MAP2K1IP1	4	Homo sapiens mitogen-activated protein kinase kinase 1 interacting protein 1 (MAP2K1IP1), mRNA.	MP1	NM_021970.2
ILMN_1659437	TXNDC17	12916.5	2	2711.52	0	0	8890.87	2	142.31	0	-6.05791	0.688336	ILMN_8122	TXNDC17	17	Homo sapiens thioredoxin domain containing 17 (TXNDC17), mRNA.	TRP14; MGC14353; TXNL5	NM_032731.3
ILMN_1659444	KIF1B	20.4168	2	2.88329	0.0301205	0	33.6441	2	10.0835	0.0195783	0.000291313	1.64787	ILMN_1253	KIF1B	1	Homo sapiens kinesin family member 1B (KIF1B), transcript variant 1, mRNA.	KIAA0591; HMSNII; CMT2; KIAA1448; CMT2A; MGC134844; KLP; FLJ23699; CMT2A1	NM_015074.2
ILMN_1659452	AAA1	4.4885	2	0.69177	0.174699	0	7.83739	2	0.769885	0.111446	0.000291313	1.7461	ILMN_23093	AAA1	7	Homo sapiens AAA1 protein (AAA1), transcript variant VIII, mRNA.		NM_207290.1
ILMN_1659462	DUSP23	3161.33	2	835.822	0	0	2674.59	2	13.3084	0	-0.000291313	0.846033	ILMN_6272	DUSP23	1	Homo sapiens dual specificity phosphatase 23 (DUSP23), mRNA.	MOSP; FLJ20442; RP11-190A12.1; DUSP25; VHZ; LDP-3	NM_017823.3
ILMN_1659463	APAF1	1002.79	2	11.8638	0	0	892.844	2	100.355	0	-0.130552	0.890358	ILMN_886	APAF1	12	Homo sapiens apoptotic peptidase activating factor 1 (APAF1), transcript variant 1, mRNA.	CED4; DKFZp781B1145	NM_013229.2
ILMN_1659464	FAM71F1	-8.09026	2	1.3131	0.921687	0	-5.79128	2	1.28511	0.75753	0.000291313	0.715834	ILMN_136976	FAM71F1	7	Homo sapiens family with sequence similarity 71, member F1 (FAM71F1), mRNA.	NYD-SP18; FAM137A	NM_032599.2
ILMN_1659470	PBRM1	111.055	2	30.3249	0.00301205	0	123.942	2	7.5845	0.00150602	0.000291313	1.11605	ILMN_16253	PBRM1	3	Homo sapiens polybromo 1 (PBRM1), transcript variant 4, mRNA.	MGC156156; BAF180; MGC156155; PB1	NM_181042.2
ILMN_1659475	KRTAP4-5	-6.51039	2	2.69903	0.811747	0	-9.89831	2	1.29838	0.963855	-0.000291313	1.52039	ILMN_1062	KRTAP4-5	17	Homo sapiens keratin associated protein 4-5 (KRTAP4-5), mRNA.	KRTAP4.5; KAP4.5	NM_033188.3
ILMN_1659484	MAGEC3	-5.05053	2	2.77621	0.707831	0	-3.40064	2	2.62817	0.554217	0.000291313	0.673322	ILMN_5167	MAGEC3	X	Homo sapiens melanoma antigen family C, 3 (MAGEC3), transcript variant 2, mRNA.	MGC119270; MGC119271; HCA2; MAGEC4; MAGE-C3	NM_177456.2
ILMN_1659517	WDR89	13.7814	2	4.63355	0.0527108	0	13.177	2	4.00303	0.0542169	-0.000291313	0.956141	ILMN_1497	WDR89	14	Homo sapiens WD repeat domain 89 (WDR89), transcript variant 2, mRNA.	MSTP050; MGC9907; C14orf150	NM_080666.2
ILMN_1659522	EPS8L1	1.50305	2	3.08819	0.262048	0	0.733543	2	0.979263	0.286145	-0.000291313	0.488036	ILMN_21549	EPS8L1	19	Homo sapiens EPS8-like 1 (EPS8L1), transcript variant 3, mRNA.	DRC3; PP10566; EPS8R1; FLJ20258; MGC23164; MGC4642	NM_139204.1
ILMN_1659523	USP39	1545.39	2	112.745	0	0	1351.51	2	126.729	0	-1.33168	0.87454	ILMN_24300	USP39	2	Homo sapiens ubiquitin specific peptidase 39 (USP39), mRNA.	SAD1; MGC75069; HSPC332; CGI-21	NM_006590.2
ILMN_1659537	MED8	95.3095	2	5.61796	0.00451807	0	122.47	2	4.04039	0.00301205	2.95957	1.28498	ILMN_1049	MED8	1	Homo sapiens mediator of RNA polymerase II transcription, subunit 8 homolog (S. cerevisiae) (MED8), transcript variant 1, mRNA.	MGC19641; MGC17544; ARC32	NM_201542.2
ILMN_1659541	CRELD1	7.3948	2	3.55442	0.115964	0	9.39959	2	4.19551	0.0918675	0.000291313	1.27111	ILMN_26101	CRELD1	3	Homo sapiens cysteine-rich with EGF-like domains 1 (CRELD1), transcript variant 2, mRNA.	AVSD2; CIRRIN; DKFZP566D213	NM_015513.3
ILMN_1659544	STX3	1356.37	2	12.0956	0	0	2204.62	2	1.85668	0	73.4169	1.62539	ILMN_18859	STX3	11	Homo sapiens syntaxin 3 (STX3), mRNA.	STX3A	NM_004177.3
ILMN_1659564	SEC61A1	6309.21	2	1190.19	0	0	5513.75	2	32.4467	0	-0.000291313	0.87392	ILMN_9397	SEC61A1	3	Homo sapiens Sec61 alpha 1 subunit (S. cerevisiae) (SEC61A1), mRNA.	HSEC61; SEC61A; SEC61	NM_013336.3
ILMN_1659565	MFAP2	3.58174	2	0.591893	0.197289	0	2.22726	2	1.39434	0.21988	-0.000291313	0.621836	ILMN_14313	MFAP2	1	Homo sapiens microfibrillar-associated protein 2 (MFAP2), transcript variant 1, mRNA.	MAGP-1; MAGP; MAGP1	NM_017459.1
ILMN_1659572	AR	-5.81162	2	1.54995	0.774096	0	-3.46129	2	1.97589	0.558735	0.000291313	0.595581	ILMN_13052	AR	X	Homo sapiens androgen receptor (dihydrotestosterone receptor; testicular feminization; spinal and bulbar muscular atrophy; Kennedy disease) (AR), transcript variant 1, mRNA.	DHTR; SMAX1; TFM; HUMARA; AIS; NR3C4; KD; SBMA	NM_000044.2
ILMN_1659576	FPGS	4.73286	2	3.45816	0.162651	0	5.43354	2	2.05104	0.144578	0.000291313	1.14805	ILMN_23306	FPGS	9	Homo sapiens folylpolyglutamate synthase (FPGS), nuclear gene encoding mitochondrial protein, transcript variant 1, mRNA.		NM_004957.4
ILMN_1659599	ADC	34.4045	2	0.0307391	0.0165663	0	46.1738	2	8.52501	0.0150602	0.000291313	1.34209	ILMN_793	ADC	1	Homo sapiens arginine decarboxylase (ADC), mRNA.	ODC1L; KIAA1945; AZI2; ODC-p	NM_052998.2
ILMN_1659601	CCL26	11.5619	2	4.37223	0.0662651	0	49.0282	2	7.65908	0.0150602	11.3035	4.2405	ILMN_6946	CCL26	7	Homo sapiens chemokine (C-C motif) ligand 26 (CCL26), mRNA.	MIP-4alpha; TSC-1; MGC126714; IMAC; SCYA26; MIP-4a	NM_006072.4
ILMN_1659610	TJP3	502.406	2	7.72226	0	0	687.427	2	88.5559	0	9.62839	1.36827	ILMN_12372	TJP3	19	Homo sapiens tight junction protein 3 (zona occludens 3) (TJP3), mRNA.	ZO-3; MGC119546	NM_014428.1
ILMN_1659620	MYCBP	95.3362	2	17.1081	0.00451807	0	69.4778	2	9.38713	0.0060241	-1.64578	0.728767	ILMN_15890	MYCBP	1	Homo sapiens c-myc binding protein (MYCBP), mRNA.	AMY-1	NM_012333.3
ILMN_1659645	PRG3	-5.57689	2	1.14181	0.748494	0	-7.17439	2	1.81388	0.855422	-0.000291313	1.28645	ILMN_22985	PRG3	11	Homo sapiens proteoglycan 3 (PRG3), mRNA.	MBPH; MGC141971; MGC126662	NM_006093.2
ILMN_1659649	SGCG	1.77917	2	6.58329	0.25	0	0.242519	2	0.826546	0.310241	-0.000291313	0.136311	ILMN_28150	SGCG	13	Homo sapiens sarcoglycan, gamma (35kDa dystrophin-associated glycoprotein) (SGCG), mRNA.	SCG3; DMDA1; DMDA; SCARMD2; DAGA4; TYPE; A4; LGMD2C; MGC130048; MAM	NM_000231.1
ILMN_1659678	GABRA2	-2.06761	2	0.555655	0.468373	0	-4.43774	2	0.815231	0.665663	-0.000291313	2.14632	ILMN_2368	GABRA2	4	Homo sapiens gamma-aminobutyric acid (GABA) A receptor, alpha 2 (GABRA2), mRNA.		NM_000807.1
ILMN_1659682	GALK2	164.452	2	34.4359	0	0	273.795	2	73.0821	0	4.59541	1.66489	ILMN_10957	GALK2	15	Homo sapiens galactokinase 2 (GALK2), transcript variant 1, mRNA.	GK2; MGC1745	NM_002044.2
ILMN_1659688	LGALS3BP	1372.32	2	372.22	0	0	997.834	2	49.5096	0	-1.77276	0.727117	ILMN_24091	LGALS3BP	17	Homo sapiens lectin, galactoside-binding, soluble, 3 binding protein (LGALS3BP), mRNA.	MAC-2-BP; 90K	NM_005567.2
ILMN_1659696	USP6NL	-1.17514	2	1.05242	0.411145	0	-2.95828	2	1.009	0.506024	-0.000291313	2.51739	ILMN_32294	USP6NL		PREDICTED: Homo sapiens USP6 N-terminal like, transcript variant 6 (USP6NL), mRNA.		XM_943800.2
ILMN_1659703	WWP2	266.897	2	14.2275	0	0	238.783	2	12.95	0	-0.0343586	0.894661	ILMN_7085	WWP2	16	Homo sapiens WW domain containing E3 ubiquitin protein ligase 2 (WWP2), transcript variant 3, mRNA.	WWp2-like; AIP2	NM_199423.1
ILMN_1659725	EXOSC5	985.078	2	189.601	0	0	588.262	2	45.6446	0	-13.6373	0.597173	ILMN_6934	EXOSC5	19	Homo sapiens exosome component 5 (EXOSC5), mRNA.	RRP46; Rrp46p; p12B; MGC111224; MGC12901; RRP41B; hRrp46p	NM_020158.3
ILMN_1659727	CDAN1	242.473	2	23.8998	0	0	224.93	2	0.13085	0	-0.000291313	0.92765	ILMN_18986	CDAN1		PREDICTED: Homo sapiens congenital dyserythropoietic anemia, type I (CDAN1), mRNA.		XM_001129302.1
ILMN_1659744	PRMT1	31.701	2	0.727606	0.0180723	0	36.8018	2	3.77486	0.0195783	0.000291313	1.1609	ILMN_19878	PRMT1	19	Homo sapiens protein arginine methyltransferase 1 (PRMT1), transcript variant 2, mRNA.	IR1B4; ANM1; HRMT1L2; HCP1	NM_198319.2
ILMN_1659753	LAMP2	568.831	2	56.0335	0	0	766.556	2	44.9888	0	21.755	1.3476	ILMN_29225	LAMP2	X	Homo sapiens lysosomal-associated membrane protein 2 (LAMP2), transcript variant LAMP2B, mRNA.	CD107b; LAMP-2C; LAMPB	NM_013995.1
ILMN_1659762	BTF3	11860.2	2	300.32	0	0	12465.7	2	250.906	0	0.000291313	1.05105	ILMN_138563	BTF3	5	Homo sapiens basic transcription factor 3 (BTF3), mRNA.	BETA-NAC; BTF3a; BTF3b; NACB	NM_001207.3
ILMN_1659766	BAG3	1802.24	2	305.971	0	0	1932.43	2	149.471	0	0.000291313	1.07224	ILMN_9420	BAG3	10	Homo sapiens BCL2-associated athanogene 3 (BAG3), mRNA.	CAIR-1; BIS; BAG-3; MGC104307	NM_004281.3
ILMN_1659769	MRAP	-3.37421	2	0.411604	0.561747	0	-7.04411	2	0.82171	0.840361	-0.000291313	2.08763	ILMN_23262	MRAP	21	Homo sapiens melanocortin 2 receptor accessory protein (MRAP), transcript variant 2, mRNA.	FGD2; C21orf61; B27; GCCD2; FALP	NM_206898.1
ILMN_1659770	KCNJ15	-2.99519	2	3.05184	0.540663	0	-5.40143	2	4.13037	0.725904	-0.000291313	1.80337	ILMN_27276	KCNJ15	21	Homo sapiens potassium inwardly-rectifying channel, subfamily J, member 15 (KCNJ15), transcript variant 1, mRNA.	KIR1.3; IRKK; KIR4.2; MGC13584	NM_170736.1
ILMN_1659772	CNGA2	-0.229001	2	1.67222	0.34488	0	3.13451	2	1.59818	0.191265	0.000291313	-13.6878	ILMN_18928	CNGA2	X	Homo sapiens cyclic nucleotide gated channel alpha 2 (CNGA2), mRNA.	CNG2; OCNCALPHA; OCNC1; OCNCa; FLJ46312; CNCA; CNCA1	NM_005140.1
ILMN_1659781	CSMD3	-5.90709	2	0.0741954	0.775602	0	-6.1086	2	3.03907	0.78012	-0.000291313	1.03411	ILMN_28174	CSMD3	8	Homo sapiens CUB and Sushi multiple domains 3 (CSMD3), transcript variant c, mRNA.	KIAA1894	NM_052900.2
ILMN_1659782	STK19	259.734	2	10.5199	0	0	327.685	2	11.9289	0	8.60133	1.26162	ILMN_3754	STK19	6	Homo sapiens serine/threonine kinase 19 (STK19), transcript variant 1, mRNA.	RP1; G11; D6S60E; D6S60; HLA-RP1; MGC117388	NM_004197.1
ILMN_1659786	CCDC76	293.735	2	39.1491	0	0	363.777	2	16.4266	0	5.6946	1.23846	ILMN_2869	CCDC76	1	Homo sapiens coiled-coil domain containing 76 (CCDC76), mRNA.	FLJ10287; FLJ11219	NM_019083.1
ILMN_1659792	HOXD9	71.6261	2	16.1498	0.00451807	0	89.0053	2	6.43216	0.00451807	0.000291313	1.24264	ILMN_508	HOXD9	2	Homo sapiens homeobox D9 (HOXD9), mRNA.	Hox-5.2; HOX4C; HOX4; Hox-4.3	NM_014213.2
ILMN_1659800	BCL11A	26.9363	2	6.39367	0.0225904	0	16.0008	2	7.96844	0.0436747	-0.000291313	0.594023	ILMN_25971	BCL11A	2	Homo sapiens B-cell CLL/lymphoma 11A (zinc finger protein) (BCL11A), transcript variant 1, mRNA.	BCL11A-L; CTIP1; FLJ10173; BCL11A-XL; BCL11A-S; FLJ34997; KIAA1809; EVI9; HBFQTL5	NM_022893.3
ILMN_1659801	ATP6V1C1	333.75	2	22.8246	0	0	379.284	2	19.5033	0	1.45015	1.13643	ILMN_12844	ATP6V1C1	8	Homo sapiens ATPase, H+ transporting, lysosomal 42kDa, V1 subunit C1 (ATP6V1C1), mRNA.	VATC; FLJ20057; ATP6D; Vma5; ATP6C	NM_001695.4
ILMN_1659820	OLA1	11.2998	2	2.2363	0.0677711	0	15.764	2	4.9074	0.0451807	0.000291313	1.39508	ILMN_2468	OLA1	2	Homo sapiens Obg-like ATPase 1 (OLA1), transcript variant 1, mRNA.	PTD004; DKFZp313H1942; GTPBP9	NM_013341.3
ILMN_1659823	PCDH1	3.09654	2	1.46168	0.210843	0	-1.04408	2	4.16432	0.375	-0.000291313	-0.337178	ILMN_26923	PCDH1	5	Homo sapiens protocadherin 1 (PCDH1), transcript variant 2, mRNA.	PC42; PCDH42; MGC45991	NM_032420.2
ILMN_1659836	RAET1G	85.8226	2	3.85358	0.00451807	0	118.041	2	9.59941	0.00301205	5.22246	1.3754	ILMN_15718	RAET1G	6	Homo sapiens retinoic acid early transcript 1G (RAET1G), mRNA.		NM_001001788.2
ILMN_1659843	DNAJC3	68.0455	2	13.9288	0.00451807	0	54.3837	2	7.92667	0.0105422	-0.000291313	0.799226	ILMN_26093	DNAJC3	13	Homo sapiens DnaJ (Hsp40) homolog, subfamily C, member 3 (DNAJC3), mRNA.	PRKRI; HP58; P58IPK; P58	NM_006260.2
ILMN_1659845	KIAA0355	323.421	2	39.803	0	0	459.11	2	45.4123	0	15.7438	1.41954	ILMN_16416	KIAA0355	19	Homo sapiens KIAA0355 (KIAA0355), mRNA.		NM_014686.3
ILMN_1659851	LOC389832	8.74755	2	0.621822	0.100904	0	5.60457	2	2.57034	0.143072	-0.000291313	0.640702	ILMN_17116	LOC389832	21	Homo sapiens similar to chromosome 2 open reading frame 27 (LOC389832), mRNA.		NM_001013654.1
ILMN_1659856	FAM167B	8.69131	2	5.33714	0.105422	0	10.6006	2	3.97888	0.0798193	0.000291313	1.21968	ILMN_5462	FAM167B	1	Homo sapiens family with sequence similarity 167, member B (FAM167B), mRNA.	MGC10820	NM_032648.2
ILMN_1659857	SNAP29	260.148	2	34.5619	0	0	339.421	2	13.531	0	9.89056	1.30472	ILMN_20709	SNAP29	22	Homo sapiens synaptosomal-associated protein, 29kDa (SNAP29), mRNA.	CEDNIK; SNAP-29; FLJ21051	NM_004782.2
ILMN_1659874	SFRS15	564.79	2	20.5883	0	0	495.042	2	23.0659	0	-1.67829	0.876506	ILMN_18564	SFRS15	21	Homo sapiens splicing factor, arginine/serine-rich 15 (SFRS15), mRNA.	SCAF4; DKFZP434E098; FLJ23364; SRA4; KIAA1172	NM_020706.1
ILMN_1659885	ACSS3	3.57702	2	3.07641	0.200301	0	1.76991	2	10.6993	0.24247	-0.000291313	0.4948	ILMN_4608	ACSS3	12	Homo sapiens acyl-CoA synthetase short-chain family member 3 (ACSS3), mRNA.	FLJ21963	NM_024560.2
ILMN_1659888	PPP1R14B	4265.05	2	861.186	0	0	2511.32	2	193.784	0	-13.003	0.588813	ILMN_15524	PPP1R14B	11	Homo sapiens protein phosphatase 1, regulatory (inhibitor) subunit 14B (PPP1R14B), mRNA.	SOM172; PLCB3N; PNG; PHI-1	NM_138689.2
ILMN_1659893	2010-12-01	-1.95538	2	2.3149	0.459337	0	-2.41933	2	3.18799	0.465361	-0.000291313	1.23727	ILMN_6560	2010-12-01	9	Homo sapiens deleted in esophageal cancer 1 (DEC1), mRNA.	CTS9	NM_017418.1
ILMN_1659895	MSN	17.2269	2	4.21519	0.0406627	0	15.83	2	5.16932	0.0451807	-0.000291313	0.918911	ILMN_10863	MSN	X	Homo sapiens moesin (MSN), mRNA.		NM_002444.2
ILMN_1659905	FKBP10	45.43	2	15.5891	0.0120482	0	33.4856	2	9.8153	0.0210843	-0.000291313	0.737082	ILMN_8804	FKBP10	17	Homo sapiens FK506 binding protein 10, 65 kDa (FKBP10), mRNA.	FLJ22041; hFKBP65; FKBP65	NM_021939.2
ILMN_1659913	ISG20	695.61	2	51.7136	0	0	1327.25	2	18.0606	0	129.799	1.90804	ILMN_23731	ISG20	15	Homo sapiens interferon stimulated exonuclease gene 20kDa (ISG20), mRNA.	CD25; HEM45	NM_002201.4
ILMN_1659914	C9orf98	10.4471	2	0.458641	0.0737952	0	12.7089	2	0.841134	0.0572289	0.000291313	1.2165	ILMN_18587	C9ORF98	9	Homo sapiens chromosome 9 open reading frame 98 (C9orf98), mRNA.	FLJ32704; DDX31; RP11-143F18.1; FLJ36014	NM_152572.2
ILMN_1659923	GNAQ	232.141	2	54.6473	0	0	427.009	2	65.609	0	17.1199	1.83944	ILMN_18320	GNAQ	9	Homo sapiens guanine nucleotide binding protein (G protein), q polypeptide (GNAQ), mRNA.	GAQ; G-ALPHA-q	NM_002072.2
ILMN_1659926	ST7L	57.1228	2	6.15348	0.00903614	0	50.2625	2	9.95995	0.0150602	-0.000291313	0.879903	ILMN_24639	ST7L	1	Homo sapiens suppression of tumorigenicity 7 like (ST7L), transcript variant 4, mRNA.	FLJ11657; FLJ20284; STLR; ST7R	NM_138729.2
ILMN_1659929	TCF1	14.4346	2	1.23505	0.0512048	0	6.53205	2	7.17206	0.129518	-0.000291313	0.452528	ILMN_27901	TCF1	12	Homo sapiens transcription factor 1, hepatic; LF-B1, hepatic nuclear factor (HNF1), albumin proximal factor (TCF1), mRNA.	MODY3; HNF1; HNF1A; LFB1	NM_000545.3
ILMN_1659936	PPP1R15A	1217.61	2	77.3475	0	0	1979	2	117.093	0	72.484	1.62531	ILMN_1024	PPP1R15A	19	Homo sapiens protein phosphatase 1, regulatory (inhibitor) subunit 15A (PPP1R15A), mRNA.	GADD34	NM_014330.2
ILMN_1659937	ZBTB24	357.201	2	12.5408	0	0	298.539	2	21.6074	0	-3.51451	0.835773	ILMN_6521	ZBTB24	6	Homo sapiens zinc finger and BTB domain containing 24 (ZBTB24), mRNA.	ZNF450; BIF1; PATZ2	NM_014797.1
ILMN_1659943	BACH2	4.80151	2	5.40885	0.164157	0	2.5632	2	6.6708	0.209337	-0.000291313	0.533833	ILMN_39047	BACH2	6	Homo sapiens BTB and CNC homology 1, basic leucine zipper transcription factor 2 (BACH2), mRNA.		NM_021813.1
ILMN_1659950	APC2	14.261	2	5.79711	0.0512048	0	14.1005	2	10.9499	0.0512048	-0.000291313	0.988739	ILMN_4619	APC2	19	Homo sapiens adenomatosis polyposis coli 2 (APC2), mRNA.	APCL	NM_005883.2
ILMN_1659952	MTMR2	180.055	2	33.5484	0	0	235.361	2	5.51771	0	4.75274	1.30716	ILMN_24002	MTMR2	11	Homo sapiens myotubularin related protein 2 (MTMR2), transcript variant 3, mRNA.	KIAA1073; CMT4B1; CMT4B	NM_201281.1
ILMN_1659953	2010-09-03	182.21	2	1.27183	0	0	107.245	2	7.459	0.00301205	-23.2785	0.58858	ILMN_4065	2010-09-03	22	Homo sapiens septin 3 (SEPT3), transcript variant B, mRNA.	SEP3; MGC133218; bK250D10.3	NM_019106.4
ILMN_1659960	IL4I1	-3.35975	2	2.26807	0.558735	0	-5.96919	2	1.03028	0.766566	-0.000291313	1.77668	ILMN_7993	IL4I1	19	Homo sapiens interleukin 4 induced 1 (IL4I1), transcript variant 2, mRNA.	FIG1	NM_172374.1
ILMN_1659975	C1orf216	192.499	2	18.5936	0	0	233.145	2	9.59825	0	3.75573	1.21115	ILMN_16879	C1ORF216	1	Homo sapiens chromosome 1 open reading frame 216 (C1orf216), mRNA.	FLJ38984	NM_152374.1
ILMN_1659976	CLP1	351.385	2	28.2489	0	0	323.65	2	3.68674	0	-0.000291313	0.921071	ILMN_17235	CLP1	11	Homo sapiens CLP1, cleavage and polyadenylation factor I subunit, homolog (S. cerevisiae) (CLP1), mRNA.	HEAB; hClp1	NM_006831.1
ILMN_1659982	GPR152	-3.92558	2	2.33872	0.59488	0	-4.2579	2	1.07744	0.650602	-0.000291313	1.08465	ILMN_7047	GPR152	11	Homo sapiens G protein-coupled receptor 152 (GPR152), mRNA.	PGR5; MGC148162	NM_206997.1
ILMN_1659984	MEP1A	8.00417	2	0.65692	0.108434	0	13.5549	2	0.444072	0.0527108	0.000291313	1.69348	ILMN_6712	MEP1A	6	Homo sapiens meprin A, alpha (PABA peptide hydrolase) (MEP1A), mRNA.	PPHA	NM_005588.2
ILMN_1659985	C6orf206	-4.67541	2	4.21676	0.673193	0	-5.38092	2	3.7607	0.722892	-0.000291313	1.1509	ILMN_474	C6ORF206	6	Homo sapiens chromosome 6 open reading frame 206 (C6orf206), mRNA.	MRPS18AL1; FLJ30845	NM_152732.3
ILMN_1659990	HIG2	197.872	2	38.8944	0	0	122.392	2	10.2714	0.00301205	-9.16693	0.61854	ILMN_8723	HIG2	7	Homo sapiens hypoxia-inducible protein 2 (HIG2), transcript variant 1, mRNA.	FLJ21076; MGC138388	NM_013332.3
ILMN_1659991	SLC34A1	11.9242	2	6.61081	0.063253	0	11.4117	2	0.141334	0.0722891	-0.000291313	0.957023	ILMN_25201	SLC34A1	5	Homo sapiens solute carrier family 34 (sodium phosphate), member 1 (SLC34A1), mRNA.	NPT2; SLC11; NAPI-3; NPTIIa; SLC17A2	NM_003052.2
ILMN_1660007	FLJ32658	3.52121	2	5.67849	0.194277	0	8.32639	2	3.57008	0.108434	0.000291313	2.36464	ILMN_29289	FLJ32658		Homo sapiens hypothetical protein FLJ32658 (FLJ32658), mRNA.		NM_144688.2
ILMN_1660021	M6PRBP1	2683.63	2	33.6418	0	0	3875.66	2	387.316	0	21.6967	1.44419	ILMN_10971	M6PRBP1	19	Homo sapiens mannose-6-phosphate receptor binding protein 1 (M6PRBP1), mRNA.	MGC2012; TIP47; PP17; MGC11117	NM_005817.3
ILMN_1660031	P2RY6	17.1438	2	5.68141	0.0406627	0	19.7464	2	2.87338	0.0316265	0.000291313	1.15181	ILMN_5557	P2RY6	11	Homo sapiens pyrimidinergic receptor P2Y, G-protein coupled, 6 (P2RY6), transcript variant 3, mRNA.	P2Y6; MGC15335	NM_176796.1
ILMN_1660043	UBXN11	6.92285	2	1.1022	0.123494	0	1.89316	2	3.52712	0.237952	-0.000291313	0.273466	ILMN_10090	UBXN11	1	Homo sapiens UBX domain protein 11 (UBXN11), transcript variant 2, mRNA.	PP2243; DKFZp686F04228; SOC; COA-1	NM_183008.2
ILMN_1660063	POLE4	1634.57	2	456.509	0	0	1073.18	2	3.46507	0	-3.60567	0.656555	ILMN_30060	POLE4	2	Homo sapiens polymerase (DNA-directed), epsilon 4 (p12 subunit) (POLE4), mRNA.	p12	NM_019896.2
ILMN_1660079	RNF44	229.952	2	23.0089	0	0	273.09	2	0.201658	0	3.21216	1.1876	ILMN_20290	RNF44	5	Homo sapiens ring finger protein 44 (RNF44), mRNA.	KIAA1100	NM_014901.4
ILMN_1660086	MYH11	-5.48808	2	1.52595	0.748494	0	-8.96509	2	0.817631	0.935241	-0.000291313	1.63356	ILMN_5070	MYH11	16	Homo sapiens myosin, heavy chain 11, smooth muscle (MYH11), transcript variant SM1A, mRNA.	DKFZp686D19237; FLJ35232; MGC32963; MGC126726; FAA4; SMMHC; DKFZp686D10126; AAT4; SMHC	NM_002474.2
ILMN_1660097	HTR2C	-5.55904	2	0.341819	0.75	0	-5.29623	2	0.612084	0.716867	0.000291313	0.952724	ILMN_42070	HTR2C	X	Homo sapiens 5-hydroxytryptamine (serotonin) receptor 2C (HTR2C), mRNA.	HTR1C; 5-HT2C	NM_000868.1
ILMN_1660111	UCHL3	1816.08	2	27.5888	0	0	2073.6	2	27.9399	0	2.83643	1.1418	ILMN_5191	UCHL3	13	Homo sapiens ubiquitin carboxyl-terminal esterase L3 (ubiquitin thiolesterase) (UCHL3), mRNA.	UCH-L3	NM_006002.3
ILMN_1660113	CDH7	0.906904	2	0.346369	0.287651	0	-1.91802	2	0.301661	0.433735	-0.000291313	-2.11491	ILMN_7524	CDH7	18	Homo sapiens cadherin 7, type 2 (CDH7), transcript variant a, mRNA.	CDH7L1	NM_033646.1
ILMN_1660114	MMRN1	-5.86431	2	4.23282	0.77259	0	-0.78414	2	0.989427	0.358434	0.000291313	0.133714	ILMN_3526	MMRN1	4	Homo sapiens multimerin 1 (MMRN1), mRNA.	EMILIN4; ECM; MMRN; GPIa*	NM_007351.2
ILMN_1660125	SFMBT2	-2.699	2	2.76047	0.512048	0	-1.08669	2	2.40453	0.379518	0.000291313	0.402626	ILMN_5290	SFMBT2	10	Homo sapiens Scm-like with four mbt domains 2 (SFMBT2), mRNA.		NM_001029880.1
ILMN_1660126	ARR3	-3.54644	2	2.26767	0.572289	0	-5.79426	2	1.45328	0.75753	-0.000291313	1.63382	ILMN_9978	ARR3	X	Homo sapiens arrestin 3, retinal (X-arrestin) (ARR3), mRNA.	ARRX	NM_004312.1
ILMN_1660176	ZNF582	6.09211	2	8.21899	0.137048	0	4.43447	2	1.41069	0.162651	-0.000291313	0.727904	ILMN_11476	ZNF582	19	Homo sapiens zinc finger protein 582 (ZNF582), mRNA.	FLJ30927	NM_144690.1
ILMN_1660179	MATR3	22.0426	2	11.3578	0.0271084	0	21.8457	2	6.41259	0.0301205	-0.000291313	0.991068	ILMN_15182	MATR3	5	Homo sapiens matrin 3 (MATR3), transcript variant 2, mRNA.	DKFZp686K23100; DKFZp686K0542; KIAA0723; MGC9105	NM_018834.4
ILMN_1660186	SYF2	1086.37	2	22.5979	0	0	1781.58	2	78.7291	0	75.3223	1.63994	ILMN_137521	SYF2	1	Homo sapiens SYF2 homolog, RNA splicing factor (S. cerevisiae) (SYF2), transcript variant 1, mRNA.	P29; CBPIN; DKFZp564O2082; NTC31	NM_015484.4
ILMN_1660193	ZNF529	344.259	2	55.321	0	0	434.667	2	66.3473	0	2.02032	1.26262	ILMN_24517	ZNF529	19	Homo sapiens zinc finger protein 529 (ZNF529), mRNA.	KIAA1615	NM_020951.2
ILMN_1660195	IFNA5	-1.53794	2	0.662417	0.426205	0	-3.65821	2	3.28142	0.575301	-0.000291313	2.37864	ILMN_9185	IFNA5	9	Homo sapiens interferon, alpha 5 (IFNA5), mRNA.	INFA5	NM_002169.1
ILMN_1660196	LOC643923	-4.15497	2	1.04222	0.628012	0	-0.0303413	2	3.45639	0.322289	0.000291313	0.00730241	ILMN_137688	LOC643923	11	Homo sapiens hypothetical protein LOC643923 (LOC643923), mRNA.		NM_001039772.1
ILMN_1660199	ACAA2	187.852	2	14.6252	0	0	160.523	2	12.4272	0	-0.984599	0.85452	ILMN_20024	ACAA2	18	Homo sapiens acetyl-Coenzyme A acyltransferase 2 (mitochondrial 3-oxoacyl-Coenzyme A thiolase) (ACAA2), nuclear gene encoding mitochondrial protein, mRNA.	DSAEC	NM_006111.1
ILMN_1660217	HCRTR1	-7.3626	2	1.88651	0.879518	0	-3.16257	2	4.45487	0.524096	0.000291313	0.429545	ILMN_28419	HCRTR1	1	Homo sapiens hypocretin (orexin) receptor 1 (HCRTR1), mRNA.	OX1R	NM_001525.1
ILMN_1660222	MTBP	153.533	2	25.7659	0	0	70.8137	2	3.82922	0.0060241	-23.5775	0.461227	ILMN_23111	MTBP	8	Homo sapiens Mdm2, transformed 3T3 cell double minute 2, p53 binding protein (mouse) binding protein, 104kDa (MTBP), mRNA.	MDM2BP	NM_022045.3
ILMN_1660223	CREBL2	19.9832	2	5.95456	0.0301205	0	24.5101	2	9.06083	0.0271084	0.000291313	1.22653	ILMN_21772	CREBL2	12	Homo sapiens cAMP responsive element binding protein-like 2 (CREBL2), mRNA.	MGC138362; MGC117311	NM_001310.2
ILMN_1660232	PEX5	3099.24	2	387.989	0	0	3965.75	2	35.8046	0	12.029	1.27959	ILMN_29393	PEX5	12	Homo sapiens peroxisomal biogenesis factor 5 (PEX5), mRNA.	PTS1R; PXR1	NM_000319.3
ILMN_1660261	TDRD6	33.005	2	2.94371	0.0180723	0	23.7545	2	0.129069	0.0286145	-0.000291313	0.719726	ILMN_27519	TDRD6	6	Homo sapiens tudor domain containing 6 (TDRD6), mRNA.	bA446F17.4; DKFZp781I1148; FLJ43850; NY-CO-45; TDR2	NM_001010870.1
ILMN_1660275	C2orf43	177.065	2	17.3122	0	0	236.185	2	16.9458	0	10.7217	1.33389	ILMN_2189	C2ORF43	2	Homo sapiens chromosome 2 open reading frame 43 (C2orf43), mRNA.	FLJ21820	NM_021925.2
ILMN_1660282	POPDC2	0.203865	2	0.959383	0.316265	0	-0.235374	2	2.53117	0.329819	-0.000291313	-1.15455	ILMN_17743	POPDC2	3	Homo sapiens popeye domain containing 2 (POPDC2), mRNA.	POP2	NM_022135.2
ILMN_1660283	H2BFWT	-5.2776	2	5.41766	0.743976	0	-8.22413	2	2.27697	0.917169	-0.000291313	1.55831	ILMN_8570	H2BFWT	X	Homo sapiens H2B histone family, member W, testis-specific (H2BFWT), mRNA.	MGC148131; MGC148130	NM_001002916.2
ILMN_1660292	MRPS21	717.569	2	157.64	0	0	648.142	2	7.86156	0	-0.000291313	0.903247	ILMN_18204	MRPS21	1	Homo sapiens mitochondrial ribosomal protein S21 (MRPS21), nuclear gene encoding mitochondrial protein, transcript variant 2, mRNA.	RPMS21; MRP-S21; MDS016	NM_018997.1
ILMN_1660305	PDE12	564.494	2	9.46494	0	0	613.103	2	58.9413	0	0.000291313	1.08611	ILMN_16583	PDE12	3	Homo sapiens phosphodiesterase 12 (PDE12), mRNA.		NM_177966.4
ILMN_1660306	ITGA8	-7.80346	2	0.572094	0.909639	0	-9.19936	2	3.83355	0.942771	-0.000291313	1.17888	ILMN_19523	ITGA8	10	Homo sapiens integrin, alpha 8 (ITGA8), mRNA.		NM_003638.1
ILMN_1660315	SPN	3.8967	2	1.96533	0.185241	0	11.7413	2	4.23696	0.0692771	0.000291313	3.01315	ILMN_19780	SPN	16	Homo sapiens sialophorin (SPN), transcript variant 2, mRNA.	GPL115; CD43; LSN	NM_003123.3
ILMN_1660317	LEFTY1	1.70552	2	0.173258	0.25	0	-5.63571	2	2.47304	0.743976	-0.000291313	-3.3044	ILMN_19746	LEFTY1	1	Homo sapiens left-right determination factor 1 (LEFTY1), mRNA.	LEFTYB; LEFTB	NM_020997.2
ILMN_1660321	CDH24	15.2883	2	13.3328	0.0496988	0	22.9569	2	1.17381	0.0286145	0.000291313	1.5016	ILMN_1657	CDH24	14	Homo sapiens cadherin-like 24 (CDH24), transcript variant 1, mRNA.	FLJ25193; CDH11L; MGC131880	NM_022478.2
ILMN_1660337	PPT2	5.31727	2	2.08955	0.14759	0	11.421	2	10.6996	0.0722891	0.000291313	2.14791	ILMN_31207	PPT2	6	Homo sapiens palmitoyl-protein thioesterase 2 (PPT2), transcript variant 1, mRNA.	DKFZp564P1516; C6orf8; G14	NM_005155.5
ILMN_1660341	LRPAP1	792.921	2	6.22151	0	0	651.295	2	1.32978	0	-6.22565	0.821387	ILMN_14648	LRPAP1	4	Homo sapiens low density lipoprotein receptor-related protein associated protein 1 (LRPAP1), mRNA.	MGC138272; A2MRAP; RAP; HBP44; A2RAP; MRAP	NM_002337.1
ILMN_1660345	NGRN	479.878	2	149.455	0	0	707.1	2	70.7479	0	5.0502	1.4735	ILMN_14282	NGRN	15	Homo sapiens neugrin, neurite outgrowth associated (NGRN), transcript variant 1, mRNA.	NEUGRIN; DSC92	NM_016645.2
ILMN_1660356	PPP4R4	25.6249	2	5.4014	0.0225904	0	31.3209	2	3.01572	0.0210843	0.000291313	1.22228	ILMN_20971	PPP4R4	14	Homo sapiens protein phosphatase 4, regulatory subunit 4 (PPP4R4), transcript variant 2, mRNA.		NM_020958.2
ILMN_1660360	NPY2R	-2.71004	2	0.609687	0.516566	0	-0.942778	2	1.19456	0.375	0.000291313	0.347884	ILMN_29436	NPY2R	4	Homo sapiens neuropeptide Y receptor Y2 (NPY2R), mRNA.		NM_000910.2
ILMN_1660364	PSCD4	-6.87779	2	0.00916637	0.840361	0	-7.03639	2	0.835888	0.838855	-0.000291313	1.02306	ILMN_16536	PSCD4	22	Homo sapiens pleckstrin homology, Sec7 and coiled-coil domains 4 (PSCD4), mRNA.	DJ63G5.1; CYT4	NM_013385.2
ILMN_1660368	TRRAP	2180.43	2	343.111	0	0	2477.37	2	31.6784	0	0.436187	1.13618	ILMN_18258	TRRAP	7	Homo sapiens transformation/transcription domain-associated protein (TRRAP), mRNA.	PAF400; STAF40; Tra1; FLJ10671; PAF350/400; TR-AP	NM_003496.1
ILMN_1660372	GRIA2	1.53949	2	8.99846	0.263554	0	-0.817324	2	1.4999	0.358434	-0.000291313	-0.530905	ILMN_14219	GRIA2	4	Homo sapiens glutamate receptor, ionotropic, AMPA 2 (GRIA2), mRNA.	HBGR2; GLURB; GLUR2	NM_000826.2
ILMN_1660375	XAGE2	-5.07604	2	4.17911	0.721386	0	0.377078	2	3.3474	0.302711	0.000291313	-0.0742857	ILMN_33416	XAGE2	X	Homo sapiens X antigen family, member 2 (XAGE2), mRNA.	XAGE-2; GAGED3	NM_130777.1
ILMN_1660379	C22orf40	21.1701	2	5.21401	0.0286145	0	29.5706	2	0.485061	0.0240964	0.000291313	1.39681	ILMN_11584	C22ORF40	22	Homo sapiens chromosome 22 open reading frame 40 (C22orf40), mRNA.		NM_207327.4
ILMN_1660400	BRUNOL4	-7.298	2	0.838569	0.871988	0	-7.70752	2	3.00441	0.89006	-0.000291313	1.05611	ILMN_138326	BRUNOL4		PREDICTED: Homo sapiens bruno-like 4, RNA binding protein (Drosophila) (BRUNOL4), mRNA.		XM_001128998.1
ILMN_1660403	GRINL1A	2.19558	2	2.30926	0.237952	0	2.83335	2	2.27378	0.203313	0.000291313	1.29048	ILMN_1791	GRINL1A	15	Homo sapiens glutamate receptor, ionotropic, N-methyl D-aspartate-like 1A (GRINL1A), transcript variant 1, mRNA.	DKFZp586F1918	NM_015532.3
ILMN_1660408	OMP	-5.3245	2	4.87732	0.730422	0	-6.75675	2	1.88145	0.820783	-0.000291313	1.26899	ILMN_7109	OMP	11	Homo sapiens olfactory marker protein (OMP), mRNA.		NM_006189.1
ILMN_1660413	SGK2	-3.05568	2	4.02291	0.533133	0	-0.648683	2	0.199069	0.35241	0.000291313	0.212288	ILMN_22499	SGK2	20	Homo sapiens serum/glucocorticoid regulated kinase 2 (SGK2), transcript variant 1, mRNA.	H-SGK2; dJ138B7.2	NM_170693.1
ILMN_1660424	AFAP1	-5.84753	2	4.28625	0.771084	0	-6.56319	2	1.98958	0.808735	-0.000291313	1.12239	ILMN_26034	AFAP1	4	Homo sapiens actin filament associated protein 1 (AFAP1), transcript variant 1, mRNA.	AFAP-110; AFAP	NM_021638.4
ILMN_1660426	CPSF4	2400.5	2	59.8184	0	0	1922.8	2	18.1862	0	-9.1793	0.800997	ILMN_23899	CPSF4	7	Homo sapiens cleavage and polyadenylation specific factor 4, 30kDa (CPSF4), transcript variant 2, mRNA.	NAR; NEB1; CPSF30	NM_001081559.1
ILMN_1660433	ARID1B	7.39213	2	2.0449	0.115964	0	4.42393	2	2.36079	0.162651	-0.000291313	0.598465	ILMN_30137	ARID1B	6	Homo sapiens AT rich interactive domain 1B (SWI1-like) (ARID1B), transcript variant 3, mRNA.	BRIGHT; p250R; DAN15; BAF250b; KIAA1235; ELD/OSA1; 6A3-5; RP11-419L10.1	NM_175863.2
ILMN_1660436	HSPA1B	10724	2	1199.21	0	0	13574.1	2	602.636	0	13.0591	1.26577	ILMN_25549	HSPA1B	6	Homo sapiens heat shock 70kDa protein 1B (HSPA1B), mRNA.	HSP70-2; HSPA1A	NM_005346.3
ILMN_1660446	BTNL3	1.43706	2	3.84135	0.25753	0	2.12983	2	7.39073	0.224398	0.000291313	1.48208	ILMN_6666	BTNL3	5	Homo sapiens butyrophilin-like 3 (BTNL3), mRNA.	BTNLR	NM_197975.1
ILMN_1660462	MCOLN2	644.759	2	20.8044	0	0	594.029	2	37.3616	0	-0.000291313	0.92132	ILMN_6222	MCOLN2	1	Homo sapiens mucolipin 2 (MCOLN2), mRNA.	TRP-ML2; TRPML2; FLJ36691	NM_153259.2
ILMN_1660498	RPS27	27614.1	2	6614.93	0	0	30615.7	2	3140.08	0	0.000291313	1.1087	ILMN_33193	RPS27	1	Homo sapiens ribosomal protein S27 (metallopanstimulin 1) (RPS27), mRNA.	MPS-1; MPS1	NM_001030.3
ILMN_1660501	LY6H	-0.00694695	2	8.3393	0.320783	0	-0.365375	2	2.54699	0.335843	-0.000291313	52.595	ILMN_136978	LY6H	8	Homo sapiens lymphocyte antigen 6 complex, locus H (LY6H), mRNA.	NMLY6	NM_002347.2
ILMN_1660509	LOC340069	-3.62671	2	1.73567	0.576807	0	-7.55621	2	0.965854	0.876506	-0.000291313	2.08349	ILMN_24305	LOC340069	5	Homo sapiens hypothetical protein LOC340069 (LOC340069), mRNA.	ZNFD	NM_182761.1
ILMN_1660533	RPN1	8584.56	2	89.0797	0	0	7364.91	2	7.21368	0	-3.64015	0.857926	ILMN_14668	RPN1	3	Homo sapiens ribophorin I (RPN1), mRNA.	DKFZp686B16177; OST1; RBPH1	NM_002950.3
ILMN_1660536	USP50	-6.57614	2	3.36989	0.816265	0	-6.82775	2	3.65615	0.826807	-0.000291313	1.03826	ILMN_27113	USP50	15	Homo sapiens ubiquitin specific peptidase 50 (USP50), mRNA.		NM_203494.3
ILMN_1660541	PCNXL2	13.7088	2	0.87151	0.0527108	0	31.646	2	1.29527	0.0210843	1.4654	2.30845	ILMN_1983	PCNXL2	1	Homo sapiens pecanex-like 2 (Drosophila) (PCNXL2), transcript variant 2, mRNA.	KIAA0435; FLJ11383	NM_024938.2
ILMN_1660547	ERC1	25.8609	2	4.28528	0.0225904	0	22.1125	2	7.4257	0.0301205	-0.000291313	0.855056	ILMN_32989	ERC1	12	Homo sapiens ELKS/RAB6-interacting/CAST family member 1 (ERC1), transcript variant gamma, mRNA.	RAB6IP2; KIAA1081; Cast2; MGC12974; ELKS	NM_178038.1
ILMN_1660549	GPR177	478.143	2	38.9691	0	0	383.352	2	3.62489	0	-7.24889	0.801751	ILMN_2573	GPR177	1	Homo sapiens G protein-coupled receptor 177 (GPR177), transcript variant 2, mRNA.	FLJ23091; C1orf139; WLS; EVI; MGC131760; MRP; MGC14878	NM_001002292.1
ILMN_1660551	CRAMP1L	280.249	2	12.1322	0	0	285.731	2	0.80535	0	0.000291313	1.01956	ILMN_12672	CRAMP1L	16	Homo sapiens Crm, cramped-like (Drosophila) (CRAMP1L), mRNA.	TCE4	NM_020825.2
ILMN_1660552	BMP5	6.56986	2	5.55277	0.131024	0	1.85822	2	7.42402	0.24247	-0.000291313	0.28284	ILMN_10608	BMP5	6	Homo sapiens bone morphogenetic protein 5 (BMP5), mRNA.	MGC34244	NM_021073.2
ILMN_1660577	ATP5G2	4621.55	2	205.162	0	0	3298.96	2	366.283	0	-16.0149	0.713821	ILMN_137008	ATP5G2	12	Homo sapiens ATP synthase, H+ transporting, mitochondrial F0 complex, subunit c (subunit 9), isoform 2 (ATP5G2), nuclear gene encoding mitochondrial protein, transcript variant 2, mRNA.		NM_005176.4
ILMN_1660582	LIG3	179.057	2	26.5033	0	0	180.174	2	1.05835	0	0.000291313	1.00624	ILMN_10021	LIG3	17	Homo sapiens ligase III, DNA, ATP-dependent (LIG3), nuclear gene encoding mitochondrial protein, transcript variant alpha, mRNA.		NM_013975.2
ILMN_1660585	C15orf40	152.114	2	0.0820727	0	0	200.717	2	2.97758	0	8.47932	1.31952	ILMN_18496	C15ORF40	15	Homo sapiens chromosome 15 open reading frame 40 (C15orf40), mRNA.	MGC29937	NM_144597.1
ILMN_1660602	C1orf43	569.707	2	6.78615	0	0	653.229	2	81.9318	0	0.461039	1.14661	ILMN_933	C1ORF43	1	Homo sapiens chromosome 1 open reading frame 43 (C1orf43), transcript variant 1, mRNA.	NS5ATP4; HSPC012; DKFZp586G1722; S863-3; MGC111001; NICE-3	NM_015449.2
ILMN_1660608	GABRB3	18.1565	2	2.58356	0.0361446	0	4.55831	2	5.60778	0.158133	-0.000291313	0.251056	ILMN_137214	GABRB3	15	Homo sapiens gamma-aminobutyric acid (GABA) A receptor, beta 3 (GABRB3), transcript variant 1, mRNA.	MGC9051	NM_000814.4
ILMN_1660611	PATZ1	-2.90617	2	1.82173	0.527108	0	-6.30336	2	0.101603	0.796687	-0.000291313	2.16895	ILMN_6488	PATZ1	22	Homo sapiens POZ (BTB) and AT hook containing zinc finger 1 (PATZ1), transcript variant 1, mRNA.	ZBTB19; MAZR; ZSG; PATZ; dJ400N23; ZNF278; RIAZ	NM_014323.2
ILMN_1660624	LIMK2	41.4231	2	16.4492	0.0135542	0	28.5891	2	7.46743	0.0256024	-0.000291313	0.690175	ILMN_6284	LIMK2	22	Homo sapiens LIM domain kinase 2 (LIMK2), transcript variant 1, mRNA.		NM_001031801.1
ILMN_1660633	CAMK2N2	24.3557	2	3.96848	0.0256024	0	18.4028	2	6.17696	0.0361446	-0.000291313	0.755582	ILMN_3392	CAMK2N2	3	Homo sapiens calcium/calmodulin-dependent protein kinase II inhibitor 2 (CAMK2N2), mRNA.	CAM-KIIN	NM_033259.2
ILMN_1660635	LACTB2	891.617	2	55.3374	0	0	1158.75	2	155.378	0	6.0294	1.2996	ILMN_18082	LACTB2	8	Homo sapiens lactamase, beta 2 (LACTB2), mRNA.	CGI-83	NM_016027.1
ILMN_1660636	WWOX	3.82511	2	0.790184	0.185241	0	0.323634	2	0.575874	0.308735	-0.000291313	0.0846079	ILMN_21082	WWOX	16	Homo sapiens WW domain containing oxidoreductase (WWOX), transcript variant 2, mRNA.	FOR; HHCMA56; FRA16D; WWOX v8; WOX1; D16S432E; PRO0128	NM_130791.1
ILMN_1660639	TSHR	-9.31794	2	2.65119	0.965361	0	-7.93523	2	1.89114	0.899096	0.000291313	0.851607	ILMN_14170	TSHR	14	Homo sapiens thyroid stimulating hormone receptor (TSHR), transcript variant 2, mRNA.	hTSHR-I; LGR3; MGC75129	NM_001018036.1
ILMN_1660654	CDCA2	361.759	2	94.2593	0	0	156.118	2	2.64361	0.00150602	-15.2824	0.431553	ILMN_19331	CDCA2	8	Homo sapiens cell division cycle associated 2 (CDCA2), mRNA.	MGC129907; MGC129906; Repo-Man; FLJ25804	NM_152562.2
ILMN_1660661	TCP1	1264.46	2	382.49	0	0	1264.19	2	99.0478	0	-0.000291313	0.999781	ILMN_418	TCP1	6	Homo sapiens t-complex 1 (TCP1), transcript variant 1, mRNA.	TCP-1-alpha; CCT1; D6S230E; CCTa; CCT-alpha	NM_030752.2
ILMN_1660663	DYRK1A	127.378	2	73.3166	0.00150602	0	195.657	2	4.11193	0	1.03541	1.53603	ILMN_39385	DYRK1A	21	Homo sapiens dual-specificity tyrosine-(Y)-phosphorylation regulated kinase 1A (DYRK1A), transcript variant 4, mRNA.	HP86; DYRK; DYRK1; MNBH; MNB	NM_130437.2
ILMN_1660674	LOC642181	2.10475	2	1.28043	0.24247	0	4.02785	2	6.65749	0.170181	0.000291313	1.9137	ILMN_45714	LOC642181		PREDICTED: Homo sapiens similar to scavenger receptor protein family member (LOC642181), mRNA.		XM_936338.1
ILMN_1660691	RAB31	-4.92593	2	3.33014	0.697289	0	4.9014	2	1.68791	0.158133	0.000291313	-0.99502	ILMN_6528	RAB31	18	Homo sapiens RAB31, member RAS oncogene family (RAB31), mRNA.	Rab22B	NM_006868.2
ILMN_1660693	SYN1	-6.34447	2	3.83658	0.804217	0	-6.86919	2	0.948824	0.828313	-0.000291313	1.0827	ILMN_1145	SYN1	X	Homo sapiens synapsin I (SYN1), transcript variant Ib, mRNA.	SYN1a; SYNI; SYN1b	NM_133499.2
ILMN_1660698	GTPBP8	475.623	2	69.1376	0	0	433.517	2	11.7004	0	-0.000291313	0.911472	ILMN_26469	GTPBP8	3	Homo sapiens GTP-binding protein 8 (putative) (GTPBP8), transcript variant 1, mRNA.	HSPC135	NM_014170.2
ILMN_1660718	GABBR2	-8.08598	2	3.95915	0.915663	0	-8.74425	2	1.41483	0.930723	-0.000291313	1.08141	ILMN_18287	GABBR2	9	Homo sapiens gamma-aminobutyric acid (GABA) B receptor, 2 (GABBR2), mRNA.	HRIHFB2099; GPRC3B; HG20; GPR51; FLJ36928; GABABR2	NM_005458.5
ILMN_1660721	STX1B	-3.76436	2	1.11257	0.585843	0	-7.83349	2	4.54195	0.894578	-0.000291313	2.08096	ILMN_25000	STX1B	16	Homo sapiens syntaxin 1B (STX1B), mRNA.	STX1B2; STX1B1	NM_052874.1
ILMN_1660723	RDH13	459.147	2	23.9768	0	0	389.77	2	24.4221	0	-3.23206	0.848901	ILMN_10594	RDH13	19	Homo sapiens retinol dehydrogenase 13 (all-trans/9-cis) (RDH13), mRNA.		NM_138412.2
ILMN_1660727	ENPP5	99.2168	2	6.64608	0.00301205	0	165.732	2	8.5016	0	25.0529	1.6704	ILMN_11662	ENPP5	6	Homo sapiens ectonucleotide pyrophosphatase/phosphodiesterase 5 (putative function) (ENPP5), mRNA.	KIAA0879	NM_021572.4
ILMN_1660729	ATP6V1C2	50.6482	2	3.81937	0.0105422	0	60.1099	2	5.78341	0.00903614	0.000291313	1.18681	ILMN_139249	ATP6V1C2	2	Homo sapiens ATPase, H+ transporting, lysosomal 42kDa, V1 subunit C2 (ATP6V1C2), transcript variant 2, mRNA.	VMA5; ATP6C2	NM_144583.3
ILMN_1660730	SLC7A3	-1.79594	2	5.24357	0.436747	0	3.86641	2	0.723024	0.170181	0.000291313	-2.15287	ILMN_25300	SLC7A3	X	Homo sapiens solute carrier family 7 (cationic amino acid transporter, y+ system), member 3 (SLC7A3), transcript variant 1, mRNA.	CAT-3; ATRC3; FLJ14541; MGC20687	NM_032803.4
ILMN_1660732	PPP2R2B	80.3915	2	4.7215	0.00451807	0	65.4556	2	1.9624	0.00903614	-0.000291313	0.814211	ILMN_1007	PPP2R2B	5	Homo sapiens protein phosphatase 2 (formerly 2A), regulatory subunit B, beta isoform (PPP2R2B), transcript variant 4, mRNA.	PR2AB-BETA; PR52B; PR2APR55-BETA; PR2AB55-BETA; MGC24888; PR55-BETA; PP2A-PR55B; SCA12	NM_181676.1
ILMN_1660741	ATP2B3	10.8918	2	3.19141	0.0692771	0	3.58232	2	0.659494	0.174699	-0.000291313	0.328901	ILMN_11898	ATP2B3	X	Homo sapiens ATPase, Ca++ transporting, plasma membrane 3 (ATP2B3), transcript variant 2, mRNA.	PMCA3; PMCA3a	NM_001001344.1
ILMN_1660749	ASPSCR1	1784.97	2	53.2008	0	0	2001.21	2	61.6647	0	1.58763	1.12114	ILMN_9446	ASPSCR1	17	Homo sapiens alveolar soft part sarcoma chromosome region, candidate 1 (ASPSCR1), mRNA.	ASPS; ASPCR1; TUG; ASPL; UBXD9; RCC17	NM_024083.2
ILMN_1660786	HIPK1	10.0457	2	6.95681	0.0753012	0	9.24958	2	2.5989	0.0918675	-0.000291313	0.920747	ILMN_15751	HIPK1	1	Homo sapiens homeodomain interacting protein kinase 1 (HIPK1), transcript variant 2, mRNA.	MGC33446; KIAA0630; Nbak2; MGC26642; MGC33548; Myak	NM_152696.3
ILMN_1660793	PAQR4	1463.45	2	106.745	0	0	1690.76	2	75.1311	0	3.65593	1.15532	ILMN_20105	PAQR4	16	Homo sapiens progestin and adipoQ receptor family member IV (PAQR4), mRNA.	FLJ30002	NM_152341.2
ILMN_1660806	CSRP2	851.433	2	197.912	0	0	587.906	2	22.0762	0	-4.42661	0.69049	ILMN_3862	CSRP2	12	Homo sapiens cysteine and glycine-rich protein 2 (CSRP2), mRNA.	LMO5; CRP2; SmLIM	NM_001321.1
ILMN_1660808	WFDC1	-1.43552	2	3.80685	0.426205	0	-3.60157	2	0.518197	0.569277	-0.000291313	2.50889	ILMN_26086	WFDC1	16	Homo sapiens WAP four-disulfide core domain 1 (WFDC1), mRNA.	PS20	NM_021197.2
ILMN_1660810	TTC17	391.132	2	87.4799	0	0	405.866	2	16.6625	0	0.000291313	1.03767	ILMN_22995	TTC17	11	Homo sapiens tetratricopeptide repeat domain 17 (TTC17), mRNA.	DKFZp686D20222; FLJ10890; FLJ23673; FLJ13099	NM_018259.4
ILMN_1660812	C14orf11	53.6805	2	3.62199	0.0105422	0	70.3583	2	15.7691	0.0060241	0.000291313	1.31069	ILMN_1031	C14ORF11	14	Homo sapiens chromosome 14 open reading frame 11 (C14orf11), mRNA.	FLJ20578; BM036; EAPP	NM_018453.2
ILMN_1660815	CAB39L	-8.07796	2	1.66343	0.918675	0	-5.68098	2	7.57631	0.745482	0.000291313	0.703269	ILMN_9966	CAB39L	13	Homo sapiens calcium binding protein 39-like (CAB39L), transcript variant 1, mRNA.	bA103J18.3; RP11-103J18.3; MO2L; FLJ12577	NM_030925.2
ILMN_1660816	P2RX2	11.8928	2	0.0742537	0.064759	0	4.02757	2	10.5674	0.170181	-0.000291313	0.338656	ILMN_14461	P2RX2	12	Homo sapiens purinergic receptor P2X, ligand-gated ion channel, 2 (P2RX2), transcript variant 4, mRNA.	MGC129601; P2X2	NM_170683.2
ILMN_1660817	DDB2	64.6923	2	4.04124	0.0060241	0	51.8067	2	6.03853	0.0120482	-0.000291313	0.800817	ILMN_425	DDB2	11	Homo sapiens damage-specific DNA binding protein 2, 48kDa (DDB2), mRNA.	FLJ34321	NM_000107.1
ILMN_1660837	CLCN3	728.879	2	13.0499	0	0	1070.65	2	5.10906	0	40.9857	1.4689	ILMN_15279	CLCN3	4	Homo sapiens chloride channel 3 (CLCN3), transcript variant e, mRNA.	ClC-3; CLC3	NM_173872.2
ILMN_1660840	FAM152A	1476.41	2	28.1364	0	0	1362.56	2	158.509	0	-0.000291313	0.922886	ILMN_1728	FAM152A	1	Homo sapiens family with sequence similarity 152, member A (FAM152A), mRNA.	FLJ21998; PNAS-4; C1orf121; CGI-146	NM_016076.3
ILMN_1660844	INTS4	404.07	2	60.4319	0	0	503.407	2	23.4595	0	5.49994	1.24584	ILMN_16097	INTS4	11	Homo sapiens integrator complex subunit 4 (INTS4), mRNA.	INT4; MST093; MGC16733	NM_033547.3
ILMN_1660852	ZC3H6	38.1265	2	2.4417	0.0150602	0	43.4546	2	4.4847	0.0165663	0.000291313	1.13975	ILMN_25490	ZC3H6	2	Homo sapiens zinc finger CCCH-type containing 6 (ZC3H6), mRNA.	FLJ16526; FLJ41410; FLJ45877; ZC3HDC6; KIAA2035	NM_198581.2
ILMN_1660854	AMPD3	4.25587	2	2.68742	0.180723	0	-0.476523	2	3.49991	0.347892	-0.000291313	-0.111968	ILMN_13998	AMPD3	11	Homo sapiens adenosine monophosphate deaminase (isoform E) (AMPD3), transcript variant 1, mRNA.		NM_000480.2
ILMN_1660858	RIN1	91.0014	2	8.35077	0.00451807	0	80.289	2	4.59476	0.0060241	-0.000291313	0.882283	ILMN_26916	RIN1	11	Homo sapiens Ras and Rab interactor 1 (RIN1), mRNA.		NM_004292.2
ILMN_1660864	RHBDL1	35.4286	2	11.2201	0.0165663	0	36.6991	2	3.03847	0.0195783	0.000291313	1.03586	ILMN_28423	RHBDL1	16	Homo sapiens rhomboid, veinlet-like 1 (Drosophila) (RHBDL1), mRNA.	RRP; RHBDL	NM_003961.1
ILMN_1660871	NEK6	179.581	2	0.127316	0	0	282.945	2	19.9247	0	33.728	1.57558	ILMN_16991	NEK6	9	Homo sapiens NIMA (never in mitosis gene a)-related kinase 6 (NEK6), mRNA.	SID6-1512	NM_014397.3
ILMN_1660879	FRMPD2	-5.88507	2	4.90656	0.77259	0	-1.82963	2	1.72366	0.426205	0.000291313	0.310893	ILMN_11076	FRMPD2	10	Homo sapiens FERM and PDZ domain containing 2 (FRMPD2), transcript variant 3, mRNA.	PDZD5C; MGC90186; MGC35285; MGC87776; PDZK5C; MGC87777	NM_001018071.2
ILMN_1660880	RNH1	292.758	2	56.0726	0	0	286.741	2	7.24575	0	-0.000291313	0.979449	ILMN_9663	RNH1	11	Homo sapiens ribonuclease/angiogenin inhibitor 1 (RNH1), transcript variant 4, mRNA.	MGC54054; RAI; MGC4569; MGC18200; RNH	NM_203385.1
ILMN_1660882	CHRM4	-5.82823	2	1.04253	0.77259	0	-5.6261	2	2.61769	0.743976	0.000291313	0.965318	ILMN_24223	CHRM4	11	Homo sapiens cholinergic receptor, muscarinic 4 (CHRM4), mRNA.	HM4	NM_000741.2
ILMN_1660890	ACADL	-1.70283	2	4.67373	0.450301	0	-6.12259	2	4.41933	0.78012	-0.000291313	3.59554	ILMN_18883	ACADL	2	Homo sapiens acyl-Coenzyme A dehydrogenase, long chain (ACADL), nuclear gene encoding mitochondrial protein, mRNA.	LCAD; ACAD4	NM_001608.2
ILMN_1660904	TRIM15	251.545	2	15.6418	0	0	363.53	2	17.5344	0	26.5804	1.44519	ILMN_24997	TRIM15	6	Homo sapiens tripartite motif-containing 15 (TRIM15), transcript variant 1, mRNA.	ZNF178; ZNFB7; RNF93	NM_033229.1
ILMN_1660907	PTPRE	15.2363	2	10.3688	0.0496988	0	13.2307	2	5.17339	0.0527108	-0.000291313	0.868367	ILMN_23422	PTPRE	10	Homo sapiens protein tyrosine phosphatase, receptor type, E (PTPRE), transcript variant 2, mRNA.	DKFZp313F1310; PTPE; HPTPE; R-PTP-EPSILON	NM_130435.2
ILMN_1660935	MGC5139	53.3103	2	16.0848	0.0105422	0	60.1176	2	17.7874	0.00903614	0.000291313	1.12769	ILMN_39523	MGC5139	12	PREDICTED: Homo sapiens hypothetical protein MGC5139, transcript variant 2 (MGC5139), mRNA.		XM_934229.1
ILMN_1660938	TOE1	182.373	2	30.3647	0	0	105.884	2	12.8329	0.00301205	-13.8029	0.580593	ILMN_11173	TOE1	1	Homo sapiens target of EGR1, member 1 (nuclear) (TOE1), mRNA.	FLJ13949	NM_025077.2
ILMN_1660963	CCIN	-2.08675	2	3.69956	0.471386	0	-5.4914	2	3.44626	0.730422	-0.000291313	2.63155	ILMN_19044	CCIN	9	Homo sapiens calicin (CCIN), mRNA.		NM_005893.1
ILMN_1660965	MGC24975	87.2386	2	6.13334	0.00451807	0	52.4636	2	0.221133	0.0120482	-7.42912	0.601381	ILMN_12310	MGC24975	19	Homo sapiens hypothetical protein MGC24975 (MGC24975), transcript variant 2, mRNA.		NM_153359.1
ILMN_1660970	ADAMTS12	-7.5585	2	3.08908	0.896084	0	-2.66628	2	6.55507	0.483434	0.000291313	0.352753	ILMN_1110	ADAMTS12	5	Homo sapiens ADAM metallopeptidase with thrombospondin type 1 motif, 12 (ADAMTS12), mRNA.	PRO4389	NM_030955.2
ILMN_1660971	GTDC1	27.1945	2	2.22214	0.0210843	0	31.183	2	8.14667	0.0225904	0.000291313	1.14667	ILMN_15845	GTDC1	2	Homo sapiens glycosyltransferase-like domain containing 1 (GTDC1), transcript variant 2, mRNA.	mat-Xa	NM_024659.2
ILMN_1660973	GAD1	523.145	2	20.552	0	0	403.558	2	8.92431	0	-10.7662	0.771408	ILMN_4673	GAD1	2	Homo sapiens glutamate decarboxylase 1 (brain, 67kDa) (GAD1), transcript variant GAD25, mRNA.	SCP; FLJ45882; GAD	NM_013445.3
ILMN_1660978	OR11G2	4.03273	2	4.2637	0.185241	0	-3.87915	2	4.30256	0.608434	-0.000291313	-0.961918	ILMN_7840	OR11G2	14	Homo sapiens olfactory receptor, family 11, subfamily G, member 2 (OR11G2), mRNA.	OR14-34	NM_001005503.1
ILMN_1660995	AMH	41.1847	2	6.03548	0.0135542	0	28.344	2	4.05104	0.0271084	-0.000291313	0.688217	ILMN_11643	AMH	19	Homo sapiens anti-Mullerian hormone (AMH), mRNA.	MIF; MIS	NM_000479.2
ILMN_1661002	RFWD2	1715.07	2	96.9574	0	0	1826.63	2	59.4286	0	0.000291313	1.06505	ILMN_1221	RFWD2	1	Homo sapiens ring finger and WD repeat domain 2 (RFWD2), transcript variant 1, mRNA.	RP11-318C24.3; FLJ10416; COP1; RNF200	NM_022457.5
ILMN_1661003	TREH	8.00248	2	0.221973	0.108434	0	11.8008	2	2.59201	0.0692771	0.000291313	1.47464	ILMN_4554	TREH	11	Homo sapiens trehalase (brush-border membrane glycoprotein) (TREH), mRNA.	TRE; TREA; MGC129621	NM_007180.2
ILMN_1661004	FLJ25328	-7.23228	2	2.04983	0.865964	0	-11.303	2	0.1058	0.987952	-0.000291313	1.56286	ILMN_15077	FLJ25328	19	Homo sapiens hypothetical protein LOC148231 (FLJ25328), mRNA.	MGC126002	NM_152483.1
ILMN_1661010	ZMAT1	-3.16715	2	1.00541	0.548193	0	-6.07751	2	2.59557	0.778614	-0.000291313	1.91892	ILMN_9378	ZMAT1	X	Homo sapiens zinc finger, matrin type 1 (ZMAT1), transcript variant 2, mRNA.	KIAA1789	NM_001011656.1
ILMN_1661039	MRPL30	240.914	2	54.9182	0	0	199.024	2	12.7032	0	-0.000291313	0.826122	ILMN_137901	MRPL30	2	Homo sapiens mitochondrial ribosomal protein L30 (MRPL30), nuclear gene encoding mitochondrial protein, transcript variant 1, mRNA.	RPML28; MGC3314; MGC24095; FLJ44438; MRP-L28	NM_145212.2
ILMN_1661076	WFDC10B	5.35437	2	4.47449	0.14759	0	10.9791	2	3.02511	0.0798193	0.000291313	2.05049	ILMN_6217	WFDC10B	20	Homo sapiens WAP four-disulfide core domain 10B (WFDC10B), transcript variant 1, mRNA.	WAP12	NM_172006.2
ILMN_1661083	NFATC2	-2.71086	2	4.4919	0.510542	0	-6.04205	2	0.627085	0.777108	-0.000291313	2.22883	ILMN_2035	NFATC2	20	Homo sapiens nuclear factor of activated T-cells, cytoplasmic, calcineurin-dependent 2 (NFATC2), transcript variant 1, mRNA.	KIAA0611; NFATP; NFAT1	NM_012340.3
ILMN_1661109	ATF3	-6.90775	2	3.77781	0.838855	0	-4.06191	2	0.917338	0.634036	0.000291313	0.588022	ILMN_6468	ATF3	1	Homo sapiens activating transcription factor 3 (ATF3), transcript variant 3, mRNA.		NM_001030287.2
ILMN_1661129	PPP2R2C	-2.02046	2	2.23173	0.466867	0	0.290547	2	7.33068	0.310241	0.000291313	-0.143802	ILMN_18174	PPP2R2C	4	Homo sapiens protein phosphatase 2 (formerly 2A), regulatory subunit B, gamma isoform (PPP2R2C), transcript variant 1, mRNA.	PR55G; MGC33570; IMYPNO; IMYPNO1; PR52	NM_020416.3
ILMN_1661137	SH3RF2	331.689	2	24.0585	0	0	397.076	2	8.88758	0	4.88228	1.19713	ILMN_18847	SH3RF2	5	Homo sapiens SH3 domain containing ring finger 2 (SH3RF2), mRNA.	FLJ23654; RNF158; MGC149789; MGC149788; MGC90410	NM_152550.2
ILMN_1661138	GON4L	242.63	2	41.7141	0	0	285.761	2	9.64458	0	0.939821	1.17776	ILMN_43272	GON4L	1	Homo sapiens gon-4-like (C. elegans) (GON4L), transcript variant 1, mRNA.	MGC138817; FLJ23040; FLJ20203; KIAA1606; MGC138818; FLJ12923; GON4; RP11-101O6.1; DKFZp761I241; RP11-243J18.4; GON-4	NM_001037533.1
ILMN_1661142	TMF1	220.401	2	10.6222	0	0	324.934	2	51.261	0	9.5534	1.47428	ILMN_20266	TMF1	3	Homo sapiens TATA element modulatory factor 1 (TMF1), mRNA.	ARA160	NM_007114.2
ILMN_1661156	USP31	4.61745	2	2.16944	0.167169	0	0.767388	2	0.166051	0.283133	-0.000291313	0.166193	ILMN_12929	USP31	16	Homo sapiens ubiquitin specific peptidase 31 (USP31), mRNA.	KIAA1203	NM_020718.3
ILMN_1661161	SIAH1	3.53269	2	9.39124	0.206325	0	9.58664	2	9.21018	0.0888554	0.000291313	2.71369	ILMN_18192	SIAH1	16	Homo sapiens seven in absentia homolog 1 (Drosophila) (SIAH1), transcript variant 1, mRNA.	Siah-1a; Siah-1; HUMSIAH; hSIAH1	NM_003031.3
ILMN_1661170	NDUFB8	11981.1	2	820.031	0	0	10744	2	827.552	0	-0.586122	0.896744	ILMN_27115	NDUFB8	10	Homo sapiens NADH dehydrogenase (ubiquinone) 1 beta subcomplex, 8, 19kDa (NDUFB8), mRNA.	CI-ASHI; ASHI	NM_005004.2
ILMN_1661173	TRIP4	173.79	2	5.3494	0	0	322.901	2	8.29235	0	72.1291	1.858	ILMN_10213	TRIP4	15	Homo sapiens thyroid hormone receptor interactor 4 (TRIP4), mRNA.	HsT17391	NM_016213.3
ILMN_1661178	NR4A1	-2.09709	2	1.11336	0.468373	0	-4.35171	2	1.61662	0.661145	-0.000291313	2.07511	ILMN_3180	NR4A1	12	Homo sapiens nuclear receptor subfamily 4, group A, member 1 (NR4A1), transcript variant 1, mRNA.	N10; NUR77; NP10; NAK-1; MGC9485; GFRP1; NGFIB; HMR; TR3	NM_002135.3
ILMN_1661188	HIPK1	-8.55035	2	0.675969	0.929217	0	-4.82956	2	3.88845	0.685241	0.000291313	0.564837	ILMN_17708	HIPK1	1	Homo sapiens homeodomain interacting protein kinase 1 (HIPK1), transcript variant 3, mRNA.	MGC33446; KIAA0630; Nbak2; MGC26642; MGC33548; Myak	NM_198269.1
ILMN_1661189	ZBTB41	68.7515	2	13.2858	0.00451807	0	107.682	2	16.5919	0.00301205	5.38917	1.56625	ILMN_7261	ZBTB41	1	Homo sapiens zinc finger and BTB domain containing 41 (ZBTB41), mRNA.	DKFZp686C06120; FLJ36199; FRBZ1; RP11-469L3.1	NM_194314.2
ILMN_1661194	CLDN14	330.408	2	4.2894	0	0	390.085	2	14.8806	0	3.81487	1.18061	ILMN_19370	CLDN14	21	Homo sapiens claudin 14 (CLDN14), transcript variant 2, mRNA.	DFNB29	NM_012130.2
ILMN_1661196	CSF2RA	98.7684	2	1.9504	0.00301205	0	177.951	2	9.94726	0	35.7302	1.8017	ILMN_137685	CSF2RA	Y	Homo sapiens colony stimulating factor 2 receptor, alpha, low-affinity (granulocyte-macrophage) (CSF2RA), transcript variant 2, mRNA.	CSF2R; CSF2RAY; CSF2RX; GM-CSF-R-alpha; CSF2RAX; CD116; MGC3848; CDw116; GMR; MGC4838; CSF2RY; GMCSFR	NM_172245.1
ILMN_1661197	CLCF1	220.484	2	19.3499	0	0	406.675	2	2.54135	0	82.0586	1.84447	ILMN_10458	CLCF1	11	Homo sapiens cardiotrophin-like cytokine factor 1 (CLCF1), mRNA.	CISS2; NNT1; CLC; BSF3; NR6	NM_013246.2
ILMN_1661251	SPAM1	4.7442	2	0.965885	0.164157	0	1.25894	2	3.545	0.259036	-0.000291313	0.265364	ILMN_21941	SPAM1	7	Homo sapiens sperm adhesion molecule 1 (PH-20 hyaluronidase, zona pellucida binding) (SPAM1), transcript variant 1, mRNA.	HYAL3; HYA1; HYAL5; PH20; MGC26532; SPAG15; PH-20; HYAL1	NM_003117.3
ILMN_1661264	SHMT2	7051.24	2	158.128	0	0	5405.11	2	124.734	0	-13.8897	0.766547	ILMN_19915	SHMT2	12	Homo sapiens serine hydroxymethyltransferase 2 (mitochondrial) (SHMT2), nuclear gene encoding mitochondrial protein, mRNA.	SHMT; GLYA	NM_005412.4
ILMN_1661266	HLA-DQB1	-0.823628	2	0.306324	0.388554	0	-1.73599	2	0.337425	0.420181	-0.000291313	2.10773	ILMN_29988	HLA-DQB1	6	Homo sapiens major histocompatibility complex, class II, DQ beta 1 (HLA-DQB1), mRNA.	HLA-DQB; IDDM1; CELIAC1	NM_002123.2
ILMN_1661282	FRMPD2	-1.34209	2	0.771182	0.414157	0	-7.72006	2	4.70099	0.884036	-0.000291313	5.75228	ILMN_137192	FRMPD2	10	Homo sapiens FERM and PDZ domain containing 2 (FRMPD2), transcript variant 2, mRNA.	MGC35285; MGC87776; PDZK5C; PDZD5C; MGC90186; MGC87777	NM_001017929.2
ILMN_1661293	ZNF224	49.0727	2	5.00111	0.0105422	0	87.7836	2	1.79886	0.00451807	11.016	1.78885	ILMN_14427	ZNF224	19	Homo sapiens zinc finger protein 224 (ZNF224), mRNA.	ZNF27; BMZF2; KOX22; BMZF-2; ZNF255	NM_013398.1
ILMN_1661299	TLE6	66.3888	2	6.78297	0.0060241	0	68.1755	2	3.31649	0.0060241	0.000291313	1.02691	ILMN_1197	TLE6	19	Homo sapiens transducin-like enhancer of split 6 (E(sp1) homolog, Drosophila) (TLE6), mRNA.	FLJ14009; MGC14966; GRG6	NM_024760.1
ILMN_1661307	JRK	12.7695	2	5.56652	0.060241	0	11.8704	2	3.36529	0.0677711	-0.000291313	0.929594	ILMN_11460	JRK	8	Homo sapiens jerky homolog (mouse) (JRK), transcript variant 1, mRNA.	DKFZp686C24207; JH8; FLJ45729	NM_003724.2
ILMN_1661309	XKR4	-4.37558	2	1.40717	0.653614	0	-8.93853	2	0.38456	0.935241	-0.000291313	2.04282	ILMN_10615	XKR4	8	Homo sapiens XK, Kell blood group complex subunit-related family, member 4 (XKR4), mRNA.	XRG4; KIAA1889	NM_052898.1
ILMN_1661314	KLHDC7B	-5.68549	2	3.20723	0.753012	0	-6.11194	2	0.679627	0.78012	-0.000291313	1.07501	ILMN_14298	KLHDC7B	22	Homo sapiens kelch domain containing 7B (KLHDC7B), mRNA.	MGC16635	NM_138433.2
ILMN_1661325	PKP4	44.8461	2	7.86688	0.0120482	0	52.3309	2	5.4598	0.0120482	0.000291313	1.1669	ILMN_11784	PKP4	2	Homo sapiens plakophilin 4 (PKP4), transcript variant 1, mRNA.	FLJ31261; p0071; FLJ42243	NM_003628.3
ILMN_1661332	ZNF334	-6.99046	2	4.3018	0.855422	0	-4.36066	2	4.09477	0.661145	0.000291313	0.623802	ILMN_25596	ZNF334	20	Homo sapiens zinc finger protein 334 (ZNF334), transcript variant 2, mRNA.		NM_199441.1
ILMN_1661335	SPTBN1	1080.93	2	657.177	0	0	1912.94	2	304.008	0	3.02322	1.76972	ILMN_4886	SPTBN1	2	Homo sapiens spectrin, beta, non-erythrocytic 1 (SPTBN1), transcript variant 1, mRNA.	SPTB2; ELF; betaSpII	NM_003128.2
ILMN_1661337	SRM	538.674	2	58.0004	0	0	365.129	2	9.19418	0	-24.8331	0.677829	ILMN_2445	SRM	1	Homo sapiens spermidine synthase (SRM), mRNA.	SRML1; SPDSY; PAPT; SPS1	NM_003132.2
ILMN_1661342	2010-09-06	8.63369	2	9.24754	0.100904	0	1.52758	2	3.82821	0.248494	-0.000291313	0.176932	ILMN_27794	2010-09-06	X	Homo sapiens septin 6 (SEPT6), transcript variant I, mRNA.	SEP2; RP5-876A24.2; MGC16619; SEPT2; MGC20339; KIAA0128	NM_145799.2
ILMN_1661343	TNFSF14	-2.62323	2	1.41409	0.513554	0	-4.83552	2	8.04619	0.685241	-0.000291313	1.84335	ILMN_9776	TNFSF14	19	Homo sapiens tumor necrosis factor (ligand) superfamily, member 14 (TNFSF14), transcript variant 1, mRNA.	LTg; CD258; LIGHT; HVEML; TR2	NM_003807.2
ILMN_1661351	C17orf81	106.09	2	21.1073	0.00301205	0	98.6634	2	6.69436	0.00301205	-0.000291313	0.929993	ILMN_12463	C17ORF81	17	Homo sapiens chromosome 17 open reading frame 81 (C17orf81), transcript variant 3, mRNA.	HSPC002; MSTP071; MST071; DERP6	NM_203414.1
ILMN_1661355	CHRND	-5.45479	2	3.0544	0.748494	0	-8.70533	2	3.56032	0.930723	-0.000291313	1.5959	ILMN_23206	CHRND	2	Homo sapiens cholinergic receptor, nicotinic, delta (CHRND), mRNA.	FCCMS; ACHRD; CMS2A; SCCMS	NM_000751.1
ILMN_1661359	LOC158830	3.42147	2	3.75576	0.200301	0	2.93147	2	1.77499	0.200301	-0.000291313	0.856788	ILMN_10937	LOC158830	X	Homo sapiens similar to Ab2-183 (LOC158830), mRNA.		NM_001025265.1
ILMN_1661372	JUB	3.66254	2	1.28808	0.195783	0	14.9206	2	6.18117	0.0496988	0.000291313	4.07383	ILMN_21167	JUB	14	Homo sapiens jub, ajuba homolog (Xenopus laevis) (JUB), transcript variant 1, mRNA.	Ajuba; MGC15563	NM_032876.4
ILMN_1661373	AGPAT3	22.6849	2	6.51581	0.0256024	0	36.7459	2	3.63667	0.0195783	0.000291313	1.61984	ILMN_40277	AGPAT3	21	Homo sapiens 1-acylglycerol-3-phosphate O-acyltransferase 3 (AGPAT3), transcript variant 2, mRNA.	MGC4604; LPAAT-GAMMA1	NM_001037553.1
ILMN_1661395	LSM12	-7.44143	2	0.905723	0.885542	0	-8.65849	2	1.12321	0.930723	-0.000291313	1.16355	ILMN_32981	LSM12	17	Homo sapiens LSM12 homolog (S. cerevisiae) (LSM12), mRNA.	PNAS-135; FLJ30656; MGC104211	NM_152344.2
ILMN_1661409	C3orf63	36.8336	2	5.83692	0.0150602	0	29.3327	2	12.3927	0.0256024	-0.000291313	0.796357	ILMN_25103	C3ORF63	3	Homo sapiens chromosome 3 open reading frame 63 (C3orf63), mRNA.	KIAA1105; RAP140; DKFZp686C2456; se89-1	NM_015224.2
ILMN_1661417	MAGED2	27.1005	2	3.67768	0.0225904	0	36.8522	2	3.78943	0.0195783	0.000291313	1.35983	ILMN_13385	MAGED2	X	Homo sapiens melanoma antigen family D, 2 (MAGED2), transcript variant 3, mRNA.	MAGE-D2; MGC8386; MAGED; JCL-1; BCG1; 11B6; HCA10	NM_201222.1
ILMN_1661424	THAP6	147.905	2	0.68911	0	0	240.536	2	13.6304	0	34.7168	1.62629	ILMN_12095	THAP6	4	Homo sapiens THAP domain containing 6 (THAP6), mRNA.	MGC30052	NM_144721.3
ILMN_1661427	RFNG	52.7606	2	9.78071	0.0105422	0	71.9151	2	4.14738	0.0060241	1.02602	1.36305	ILMN_138134	RFNG		PREDICTED: Homo sapiens radical fringe homolog (Drosophila) (RFNG), mRNA.		XM_941367.1
ILMN_1661428	ATP11C	75.2714	2	5.79691	0.00451807	0	80.504	2	0.297526	0.0060241	0.000291313	1.06952	ILMN_3974	ATP11C	X	Homo sapiens ATPase, class VI, type 11C (ATP11C), transcript variant 1, mRNA.	ATPIQ; ATPIG	NM_173694.3
ILMN_1661434	ACSM1	-8.92321	2	0.431088	0.948795	0	-3.04415	2	2.77009	0.510542	0.000291313	0.34115	ILMN_19393	ACSM1	16	Homo sapiens acyl-CoA synthetase medium-chain family member 1 (ACSM1), mRNA.	BUCS1; MACS1	NM_052956.1
ILMN_1661439	FLOT1	1565.65	2	48.4545	0	0	1692.66	2	143.263	0	0.000291313	1.08112	ILMN_18913	FLOT1	6	Homo sapiens flotillin 1 (FLOT1), mRNA.		NM_005803.2
ILMN_1661443	GRAMD2	43.3017	2	6.62371	0.0135542	0	37.474	2	1.17928	0.0180723	-0.000291313	0.865416	ILMN_18426	GRAMD2	15	Homo sapiens GRAM domain containing 2 (GRAMD2), mRNA.		NM_001012642.1
ILMN_1661454	DGKA	-5.08227	2	4.92298	0.721386	0	-4.74696	2	1.18647	0.679217	0.000291313	0.934023	ILMN_4980	DGKA	12	Homo sapiens diacylglycerol kinase, alpha 80kDa (DGKA), transcript variant 3, mRNA.	MGC42356; DGK-alpha; DAGK1; MGC12821; DAGK	NM_001345.4
ILMN_1661458	ARF1	21.782	2	0.206762	0.0271084	0	21.3421	2	6.57888	0.0301205	-0.000291313	0.979804	ILMN_10712	ARF1	1	Homo sapiens ADP-ribosylation factor 1 (ARF1), transcript variant 3, mRNA.		NM_001024226.1
ILMN_1661476	TAC4	-2.22083	2	1.30145	0.47741	0	-7.17353	2	1.90959	0.855422	-0.000291313	3.23012	ILMN_16380	TAC4	17	Homo sapiens tachykinin 4 (hemokinin) (TAC4), transcript variant alpha, mRNA.	PPT-C; MGC133010; EK; HK-1; MGC133009	NM_170685.2
ILMN_1661484	ZBTB45	124.109	2	9.73109	0.00150602	0	117.124	2	3.93539	0.00301205	-0.000291313	0.943713	ILMN_30296	ZBTB45	19	Homo sapiens zinc finger and BTB domain containing 45 (ZBTB45), mRNA.	FLJ14486; DKFZp547H249; ZNF499	NM_032792.2
ILMN_1661485	RBM34	721.666	2	36.23	0	0	856.739	2	54.4154	0	5.36097	1.18717	ILMN_15549	RBM34	1	Homo sapiens RNA binding motif protein 34 (RBM34), mRNA.	KIAA0117	NM_015014.1
ILMN_1661490	PFDN6	816.712	2	78.9267	0	0	860.861	2	73.4818	0	0.000291313	1.05406	ILMN_8046	PFDN6	6	Homo sapiens prefoldin subunit 6 (PFDN6), mRNA.	HKE2; PFD6; H2-KE2; KE-2; MGC70744	NM_014260.2
ILMN_1661491	SH3GL2	660.899	2	4.05045	0	0	499.185	2	40.212	0	-12.0875	0.755311	ILMN_23656	SH3GL2	9	Homo sapiens SH3-domain GRB2-like 2 (SH3GL2), mRNA.	CNSA2; SH3P4; SH3D2A; EEN-B1; FLJ25015; FLJ20276	NM_003026.1
ILMN_1661492	ARRDC1	107.199	2	5.43711	0.00301205	0	126.783	2	6.07609	0.00150602	0.438245	1.18269	ILMN_11748	ARRDC1	9	Homo sapiens arrestin domain containing 1 (ARRDC1), mRNA.	RP11-48C7.5; MGC40555	NM_152285.2
ILMN_1661500	B4GALT4	776.944	2	93.9826	0	0	812.342	2	29.598	0	0.000291313	1.04556	ILMN_1477	B4GALT4	3	Homo sapiens UDP-Gal:betaGlcNAc beta 1,4- galactosyltransferase, polypeptide 4 (B4GALT4), transcript variant 2, mRNA.	B4Gal-T4; beta4Gal-T4	NM_003778.3
ILMN_1661514	LOC389827	4.00486	2	3.11171	0.185241	0	0.146389	2	5.29099	0.317771	-0.000291313	0.0365529	ILMN_30855	LOC389827	9	Homo sapiens transmembrane protein 8-like (LOC389827), mRNA.		NM_001080483.1
ILMN_1661516	POLR2J3	50.1319	2	1.73433	0.0105422	0	61.4002	2	0.139803	0.00903614	0.000291313	1.22477	ILMN_14660	POLR2J3	7	Homo sapiens polymerase (RNA) II (DNA directed) polypeptide J3 (POLR2J3), mRNA.	RPB11b2; POLR2J2; MGC54043; RPB11b1	NM_001097615.1
ILMN_1661519	KIAA0408	38.6913	2	11.6483	0.0150602	0	47.8265	2	19.6249	0.0150602	0.000291313	1.23611	ILMN_11975	KIAA0408	6	Homo sapiens KIAA0408 (KIAA0408), mRNA.	FLJ43995; RP3-403A15.2	NM_014702.3
ILMN_1661537	LEPROT	374.228	2	16.3205	0	0	561.581	2	36.4437	0	38.6293	1.50064	ILMN_27032	LEPROT	1	Homo sapiens leptin receptor overlapping transcript (LEPROT), mRNA.	OB-RGRP; OBRGRP; FLJ90360; LEPR; VPS55	NM_017526.2
ILMN_1661544	DGKA	7.16549	2	4.35294	0.115964	0	5.25336	2	1.14508	0.149096	-0.000291313	0.733147	ILMN_15179	DGKA	12	Homo sapiens diacylglycerol kinase, alpha 80kDa (DGKA), transcript variant 1, mRNA.	DAGK1; MGC12821; MGC42356; DGK-alpha; DAGK	NM_201444.2
ILMN_1661554	DIAPH1	374.317	2	94.7502	0	0	453.918	2	13.4909	0	0.403129	1.21266	ILMN_1027	DIAPH1	5	Homo sapiens diaphanous homolog 1 (Drosophila) (DIAPH1), mRNA.	LFHL1; hDIA1; DFNA1; DRF1	NM_005219.2
ILMN_1661566	FSTL4	4.08352	2	1.19962	0.182229	0	11.0038	2	8.67381	0.0798193	0.000291313	2.69469	ILMN_39544	FSTL4	5	Homo sapiens follistatin-like 4 (FSTL4), mRNA.		NM_015082.1
ILMN_1661572	APOBEC3D	-0.360265	2	5.7531	0.34488	0	-1.04095	2	3.73653	0.375	-0.000291313	2.88939	ILMN_2064	APOBEC3D	22	Homo sapiens apolipoprotein B mRNA editing enzyme, catalytic polypeptide-like 3D (putative) (APOBEC3D), mRNA.	ARP6	NM_152426.2
ILMN_1661577	MAFA	106.593	2	8.81185	0.00301205	0	103.472	2	2.79441	0.00301205	-0.000291313	0.970717	ILMN_1550	MAFA	8	Homo sapiens v-maf musculoaponeurotic fibrosarcoma oncogene homolog A (avian) (MAFA), mRNA.	RIPE3b1; hMafA	NM_201589.2
ILMN_1661589	CD151	797.001	2	54.0942	0	0	701.207	2	21.13	0	-1.68645	0.879806	ILMN_139293	CD151	11	Homo sapiens CD151 molecule (Raph blood group) (CD151), transcript variant 4, mRNA.	TSPAN24; MER2; GP27; SFA1; PETA-3; RAPH	NM_139029.1
ILMN_1661593	FAM18B	1124.48	2	30.4947	0	0	1419.19	2	133.003	0	8.14629	1.26208	ILMN_18985	FAM18B	17	Homo sapiens family with sequence similarity 18, member B (FAM18B), mRNA.	NPD008; YDR084C; FLJ46240; CGI-148	NM_016078.4
ILMN_1661594	C2orf42	383.398	2	36.503	0	0	379.79	2	6.79155	0	-0.000291313	0.990591	ILMN_9721	C2ORF42	2	Homo sapiens chromosome 2 open reading frame 42 (C2orf42), mRNA.	FLJ20558	NM_017880.1
ILMN_1661595	C1orf53	753.598	2	203.819	0	0	573.112	2	24.7727	0	-0.902005	0.760502	ILMN_19225	C1ORF53	1	Homo sapiens chromosome 1 open reading frame 53 (C1orf53), mRNA.		NM_001024594.1
ILMN_1661596	FLVCR1	259.594	2	26.9528	0	0	263.44	2	28.762	0	0.000291313	1.01482	ILMN_6283	FLVCR1	1	Homo sapiens feline leukemia virus subgroup C cellular receptor 1 (FLVCR1), mRNA.	FLVCR1; FLVCR	NM_014053.1
ILMN_1661599	DDIT4	928.818	2	2.18119	0	0	3629.27	2	137.574	0	350.901	3.90741	ILMN_13176	DDIT4	10	Homo sapiens DNA-damage-inducible transcript 4 (DDIT4), mRNA.	RTP801; Dig2; REDD1; FLJ20500; RP11-442H21.1; REDD-1	NM_019058.2
ILMN_1661616	FSHR	-6.31634	2	1.68626	0.807229	0	-5.62796	2	3.57876	0.743976	0.000291313	0.891017	ILMN_19469	FSHR	2	Homo sapiens follicle stimulating hormone receptor (FSHR), transcript variant 1, mRNA.	MGC141668; LGR1; FSHRO; MGC141667; ODG1	NM_000145.2
ILMN_1661618	C20orf85	5.21899	2	0.588392	0.14759	0	0.0501906	2	2.48851	0.319277	-0.000291313	0.00961691	ILMN_18215	C20ORF85	20	Homo sapiens chromosome 20 open reading frame 85 (C20orf85), mRNA.	bA196N14.1	NM_178456.2
ILMN_1661622	TBC1D7	707.856	2	37.6371	0	0	728.103	2	8.90901	0	0.000291313	1.0286	ILMN_10292	TBC1D7	6	Homo sapiens TBC1 domain family, member 7 (TBC1D7), mRNA.	DKFZp686N2317; PIG51; FLJ32666; dJ257A7.3; TBC7	NM_016495.2
ILMN_1661624	ARSD	8.56348	2	2.14136	0.106928	0	8.6032	2	4.14513	0.103916	0.000291313	1.00464	ILMN_23380	ARSD	X	Homo sapiens arylsulfatase D (ARSD), transcript variant 2, mRNA.		NM_009589.2
ILMN_1661627	LZIC	212.591	2	17.046	0	0	301.899	2	1.28991	0	21.1783	1.42009	ILMN_17648	LZIC	1	Homo sapiens leucine zipper and CTNNBIP1 domain containing (LZIC), mRNA.	MGC15436	NM_032368.3
ILMN_1661631	LILRA3	-4.97633	2	0.296645	0.706325	0	-2.32241	2	1.2076	0.456325	0.000291313	0.466692	ILMN_6239	LILRA3	Un|NW_001841131.1	Homo sapiens leukocyte immunoglobulin-like receptor, subfamily A (without TM domain), member 3 (LILRA3), mRNA.	HM31; LIR-4; e3; CD85E; ILT6; HM43; LIR4	NM_006865.2
ILMN_1661646	BANK1	0.836833	2	1.62937	0.290663	0	-2.09951	2	5.65818	0.439759	-0.000291313	-2.50887	ILMN_25922	BANK1	4	Homo sapiens B-cell scaffold protein with ankyrin repeats 1 (BANK1), transcript variant 2, mRNA.	FLJ34204; FLJ20706; BANK	NM_001083907.1
ILMN_1661650	SMEK2	1263.79	2	72.7058	0	0	1376.08	2	52.0181	0	0.000291313	1.08885	ILMN_21228	SMEK2	2	Homo sapiens SMEK homolog 2, suppressor of mek1 (Dictyostelium) (SMEK2), mRNA.	PSY2; FLFL2; FLJ31474; smk1; KIAA1387	NM_020463.1
ILMN_1661674	VCL	-11.0838	2	4.43308	0.990964	0	-5.83934	2	7.73167	0.763554	0.000291313	0.526837	ILMN_27566	VCL	10	Homo sapiens vinculin (VCL), transcript variant 1, mRNA.	MVCL	NM_014000.2
ILMN_1661683	THRA	92.4535	2	14.942	0.00451807	0	63.2347	2	1.59789	0.00903614	-3.52769	0.683962	ILMN_4776	THRA	17	Homo sapiens thyroid hormone receptor, alpha (erythroblastic leukemia viral (v-erb-a) oncogene homolog, avian) (THRA), transcript variant 2, mRNA.	NR1A1; THRA1; THRA2; ERB-T-1; ERBA; ERBA1; c-ERBA-1; AR7; MGC43240; MGC000261; EAR7	NM_003250.4
ILMN_1661687	IL21R	8.14467	2	0.127259	0.108434	0	3.55402	2	0.352943	0.174699	-0.000291313	0.436361	ILMN_12724	IL21R	16	Homo sapiens interleukin 21 receptor (IL21R), transcript variant 3, mRNA.	NILR; MGC10967	NM_181079.1
ILMN_1661695	IRAK3	-4.99047	2	1.58793	0.703313	0	-8.68065	2	2.51669	0.930723	-0.000291313	1.73944	ILMN_25857	IRAK3	12	Homo sapiens interleukin-1 receptor-associated kinase 3 (IRAK3), mRNA.	IRAKM; ASRT5; IRAK-M	NM_007199.1
ILMN_1661703	G6PC2	-8.11824	2	1.59232	0.921687	0	-8.40178	2	2.52635	0.921687	-0.000291313	1.03493	ILMN_1509	G6PC2	2	Homo sapiens glucose-6-phosphatase, catalytic, 2 (G6PC2), transcript variant 1, mRNA.	MGC141936; IGRP	NM_021176.2
ILMN_1661708	LGALS7	12.9543	2	10.4628	0.0587349	0	8.91952	2	1.1994	0.0978916	-0.000291313	0.688535	ILMN_30351	LGALS7	19	Homo sapiens lectin, galactoside-binding, soluble, 7 (galectin 7) (LGALS7), mRNA.	PIG1; GAL7; TP53I1	NM_002307.1
ILMN_1661733	FOLR1	0.318193	2	1.58343	0.316265	0	-0.403899	2	0.737132	0.338855	-0.000291313	-1.26935	ILMN_17047	FOLR1	11	Homo sapiens folate receptor 1 (adult) (FOLR1), transcript variant 8, mRNA.	FBP; MOv18; FOLR; FR-alpha	NM_016731.2
ILMN_1661735	MGC33894	-5.53235	2	0.658604	0.748494	0	-1.34791	2	1.11612	0.391566	0.000291313	0.243642	ILMN_13345	MGC33894	17	Homo sapiens transcript expressed during hematopoiesis 2 (MGC33894), mRNA.	DKFZp761I1115; DKFZp762H185	NM_152914.2
ILMN_1661750	VIL1	64.6015	2	1.64224	0.0060241	0	58.2097	2	0.306117	0.00903614	-0.000291313	0.901057	ILMN_14423	VIL1	2	Homo sapiens villin 1 (VIL1), mRNA.	VIL; D2S1471	NM_007127.1
ILMN_1661755	FAM129B	3656.7	2	275.167	0	0	4934.83	2	554.438	0	11.6075	1.34953	ILMN_11032	FAM129B	9	Homo sapiens family with sequence similarity 129, member B (FAM129B), transcript variant 1, mRNA.	OC58; MEG-3; FLJ13518; FLJ22298; RP11-356B19.6; bA356B19.6; FLJ22151; DKFZP434H0820; C9orf88	NM_022833.2
ILMN_1661770	JMJD2C	51.7199	2	11.9219	0.0105422	0	65.2939	2	7.1175	0.00903614	0.000291313	1.26245	ILMN_24707	JMJD2C	9	Homo sapiens jumonji domain containing 2C (JMJD2C), mRNA.	KIAA0780; GASC1; bA146B14.1; KDM4C; FLJ25949; JHDM3C	NM_015061.2
ILMN_1661776	CENPJ	376.435	2	28.6997	0	0	273.34	2	11.8424	0	-14.8745	0.726127	ILMN_11774	CENPJ	13	Homo sapiens centromere protein J (CENPJ), mRNA.	MGC131581; LAP; LIP1; MCPH6; BM032; MGC142222; MGC131582; CPAP; MGC142224	NM_018451.3
ILMN_1661778	MTL5	3.09802	2	4.35498	0.207831	0	2.85343	2	1.10438	0.203313	-0.000291313	0.92105	ILMN_137679	MTL5	11	Homo sapiens metallothionein-like 5, testis-specific (tesmin) (MTL5), transcript variant 1, mRNA.	TESMIN; MTLT; CXCDC2	NM_004923.3
ILMN_1661788	WNT5B	-8.74891	2	2.2156	0.936747	0	-8.96046	2	0.860024	0.935241	-0.000291313	1.02418	ILMN_4675	WNT5B	12	Homo sapiens wingless-type MMTV integration site family, member 5B (WNT5B), transcript variant 2, mRNA.	MGC2648	NM_030775.2
ILMN_1661799	HIGD1A	4232.57	2	747.978	0	0	4951.65	2	639	0	0.0683364	1.16989	ILMN_43100	HIGD1A	3	Homo sapiens HIG1 domain family, member 1A (HIGD1A), transcript variant 1, mRNA.	HIG1; DKFZP564K247	NM_001099668.1
ILMN_1661802	RAPGEF4	18.5836	2	4.08968	0.0346385	0	15.7261	2	10.4553	0.0466867	-0.000291313	0.846238	ILMN_7186	RAPGEF4		Homo sapiens Rap guanine nucleotide exchange factor (GEF) 4 (RAPGEF4), mRNA.	CAMP-GEFII; Nbla00496; EPAC2; CGEF2	NM_007023.2
ILMN_1661804	CTF1	7.83207	2	1.95748	0.111446	0	8.50444	2	8.327	0.105422	0.000291313	1.08585	ILMN_13986	CTF1	16	Homo sapiens cardiotrophin 1 (CTF1), mRNA.	CT1; CT-1	NM_001330.2
ILMN_1661825	TNFRSF6B	-1.01896	2	3.4966	0.393072	0	0.055986	2	0.461451	0.319277	0.000291313	-0.0549443	ILMN_21287	TNFRSF6B	20	Homo sapiens tumor necrosis factor receptor superfamily, member 6b, decoy (TNFRSF6B), transcript variant M68E, mRNA.	M68; TR6; DJ583P15.1.1; DCR3	NM_003823.2
ILMN_1661833	ANKRD12	372.901	2	4.83829	0	0	522.299	2	104.765	0	4.48267	1.40064	ILMN_26751	ANKRD12	18	Homo sapiens ankyrin repeat domain 12 (ANKRD12), transcript variant 1, mRNA.	ANCO1; FLJ20053; ANCO-2; KIAA0874; Nbla00144; GAC-1	NM_015208.3
ILMN_1661852	CNTN1	-7.37361	2	1.08769	0.884036	0	-5.76772	2	4.46079	0.75753	0.000291313	0.782211	ILMN_4746	CNTN1	12	Homo sapiens contactin 1 (CNTN1), transcript variant 1, mRNA.	GP135; F3	NM_001843.2
ILMN_1661860	ASPSCR1	38.6043	2	18.1875	0.0150602	0	55.937	2	2.7486	0.0105422	0.000291313	1.44898	ILMN_9446	ASPSCR1		PREDICTED: Homo sapiens alveolar soft part sarcoma chromosome region, candidate 1 (ASPSCR1), mRNA.		XM_001132706.1
ILMN_1661861	CSF2	-1.99211	2	2.97666	0.466867	0	-2.24043	2	1.61897	0.451807	-0.000291313	1.12465	ILMN_28163	CSF2	5	Homo sapiens colony stimulating factor 2 (granulocyte-macrophage) (CSF2), mRNA.	MGC131935; MGC138897; GMCSF	NM_000758.2
ILMN_1661862	OTOA	-1.1881	2	3.34701	0.409639	0	-7.62226	2	1.36857	0.879518	-0.000291313	6.41552	ILMN_22157	OTOA	16	Homo sapiens otoancorin (OTOA), transcript variant 1, mRNA.	MGC157747; MGC39813; DFNB22; FLJ32773	NM_144672.3
ILMN_1661875	ANK3	43.1679	2	7.23864	0.0135542	0	65.7078	2	0.42861	0.00903614	2.64346	1.52214	ILMN_2714	ANK3	10	Homo sapiens ankyrin 3, node of Ranvier (ankyrin G) (ANK3), transcript variant 2, mRNA.	ANKYRIN-G; FLJ45464	NM_001149.2
ILMN_1661886	APEX1	5998.16	2	268.909	0	0	4998.9	2	134.853	0	-5.81522	0.833406	ILMN_1992	APEX1	14	Homo sapiens APEX nuclease (multifunctional DNA repair enzyme) 1 (APEX1), transcript variant 3, mRNA.	APEX; REF1; APE1; APE-1; HAP1; APE; APX; REF-1; APEN	NM_080649.1
ILMN_1661888	MEF2A	40.7346	2	0.517801	0.0135542	0	72.5014	2	10.692	0.0060241	5.94968	1.77985	ILMN_17271	MEF2A	15	Homo sapiens myocyte enhancer factor 2A (MEF2A), mRNA.	ADCAD1; RSRFC9; RSRFC4	NM_005587.1
ILMN_1661903	CYLC2	1.49224	2	2.95581	0.262048	0	-0.185549	2	0.473837	0.329819	-0.000291313	-0.124343	ILMN_138426	CYLC2	9	Homo sapiens cylicin, basic protein of sperm head cytoskeleton 2 (CYLC2), mRNA.	MGC129591	NM_001340.2
ILMN_1661939	SGSM1	5.33099	2	4.18663	0.143072	0	8.39524	2	4.04338	0.108434	0.000291313	1.5748	ILMN_34350	SGSM1	22	Homo sapiens small G protein signaling modulator 1 (SGSM1), transcript variant 1, mRNA.	MGC133298; RUTBC2; SGSM1; KIAA1941	NM_001039948.2
ILMN_1661940	CAMTA1	199.042	2	13.7108	0	0	200.106	2	34.0687	0	0.000291313	1.00535	ILMN_5394	CAMTA1	1	Homo sapiens calmodulin binding transcription activator 1 (CAMTA1), mRNA.	KIAA0833	NM_015215.1
ILMN_1661945	C14orf156	14018.1	2	4000.57	0	0	10499.4	2	764.85	0	-0.869594	0.748988	ILMN_6302	C14ORF156	14	Homo sapiens chromosome 14 open reading frame 156 (C14orf156), mRNA.	DC50; SLIRP; PD04872	NM_031210.3
ILMN_1661966	UGCGL1	-2.99523	2	6.81468	0.527108	0	-6.14053	2	1.58245	0.78012	-0.000291313	2.0501	ILMN_17911	UGCGL1	2	Homo sapiens UDP-glucose ceramide glucosyltransferase-like 1 (UGCGL1), transcript variant 2, mRNA.	FLJ23796; HUGT1; FLJ23671	NM_001025777.1
ILMN_1661971	ARHGAP25	2.55408	2	3.41528	0.22741	0	-0.216816	2	0.260556	0.329819	-0.000291313	-0.0848901	ILMN_14823	ARHGAP25	2	Homo sapiens Rho GTPase activating protein 25 (ARHGAP25), transcript variant 2, mRNA.	KAIA0053	NM_014882.2
ILMN_1661994	ESRRG	2.5956	2	2.27827	0.222892	0	5.69355	2	4.6843	0.143072	0.000291313	2.19354	ILMN_7105	ESRRG	1	Homo sapiens estrogen-related receptor gamma (ESRRG), transcript variant 2, mRNA.	DKFZp781L1617; ERR3; KIAA0832; FLJ16023; NR3B3	NM_206594.1
ILMN_1661998	METTL6	95.9086	2	2.29798	0.00301205	0	117.314	2	19.0082	0.00301205	0.120721	1.22318	ILMN_13383	METTL6	3	Homo sapiens methyltransferase like 6 (METTL6), mRNA.	MGC24132	NM_152396.2
ILMN_1662010	DLK2	2.56693	2	1.52683	0.222892	0	-2.90875	2	1.04901	0.503012	-0.000291313	-1.13316	ILMN_6101	DLK2	6	Homo sapiens delta-like 2 homolog (Drosophila) (DLK2), transcript variant 1, mRNA.	MGC2487; EGFL9; MGC111055	NM_023932.2
ILMN_1662016	SCRN2	24.2683	2	1.72824	0.0256024	0	16.234	2	2.72357	0.0421687	-0.000291313	0.668935	ILMN_2736	SCRN2	17	Homo sapiens secernin 2 (SCRN2), mRNA.	Ses2	NM_138355.2
ILMN_1662019	SNRPN	-7.39143	2	0.746802	0.884036	0	-3.47972	2	3.58393	0.558735	0.000291313	0.470778	ILMN_21402	SNRPN	15	Homo sapiens small nuclear ribonucleoprotein polypeptide N (SNRPN), transcript variant 4, mRNA.	SNURF-SNRPN; HCERN3; SMN; RT-LI; SM-D; SNRNP-N	NM_022807.2
ILMN_1662021	ZNF326	27.2793	2	5.5745	0.0210843	0	41.5145	2	3.20843	0.0165663	0.0656825	1.52183	ILMN_19918	ZNF326	1	Homo sapiens zinc finger protein 326 (ZNF326), transcript variant 1, mRNA.	FLJ20403; dJ871E2.1; ZAN75; Zfp326; MGC61591	NM_182976.1
ILMN_1662023	KLF7	17.8241	2	4.45676	0.0391566	0	11.6362	2	5.35884	0.0707831	-0.000291313	0.652833	ILMN_28544	KLF7	2	Homo sapiens Kruppel-like factor 7 (ubiquitous) (KLF7), mRNA.	UKLF	NM_003709.2
ILMN_1662026	BTK	5.55793	2	4.09689	0.143072	0	8.18197	2	1.76287	0.108434	0.000291313	1.47213	ILMN_28021	BTK	X	Homo sapiens Bruton agammaglobulinemia tyrosine kinase (BTK), mRNA.	MGC126261; ATK; XLA; IMD1; AT; BPK; AGMX1; PSCTK1; MGC126262	NM_000061.1
ILMN_1662038	LARGE	552.867	2	60.1285	0	0	586.214	2	23.9996	0	0.000291313	1.06032	ILMN_5209	LARGE	22	Homo sapiens like-glycosyltransferase (LARGE), transcript variant 1, mRNA.	MDC1D; KIAA0609	NM_004737.3
ILMN_1662049	AGPAT5	385.939	2	64.3347	0	0	403.49	2	39.1324	0	0.000291313	1.04548	ILMN_9737	AGPAT5	8	Homo sapiens 1-acylglycerol-3-phosphate O-acyltransferase 5 (lysophosphatidic acid acyltransferase, epsilon) (AGPAT5), mRNA.	1-AGPAT5; LPAAT-epsilon; LPAAT-e	NM_018361.2
ILMN_1662065	WDR92	260.808	2	23.9766	0	0	317.433	2	37.8681	0	2.64346	1.21712	ILMN_138656	WDR92	2	Homo sapiens WD repeat domain 92 (WDR92), mRNA.	FLJ31741	NM_138458.2
ILMN_1662070	HTR3A	0.813807	2	2.68646	0.293675	0	-2.53119	2	0.0684059	0.47741	-0.000291313	-3.11031	ILMN_6982	HTR3A	11	Homo sapiens 5-hydroxytryptamine (serotonin) receptor 3A (HTR3A), transcript variant 2, mRNA.	5HT3R; HTR3; 5-HT3R; 5-HT3A; 5-HT-3	NM_000869.2
ILMN_1662086	GUCA1A	5.99682	2	2.59463	0.137048	0	10.0837	2	2.45962	0.0828313	0.000291313	1.6815	ILMN_20254	GUCA1A	6	Homo sapiens guanylate cyclase activator 1A (retina) (GUCA1A), mRNA.	GUCA; GCAP1; GUCA1; GCAP; COD3	NM_000409.2
ILMN_1662091	FLJ43860	2.81987	2	6.34335	0.218373	0	0.169856	2	0.541261	0.317771	-0.000291313	0.0602352	ILMN_24679	FLJ43860	8	Homo sapiens FLJ43860 protein (FLJ43860), mRNA.		NM_207414.2
ILMN_1662117	TCP11	-0.838538	2	0.178548	0.388554	0	-3.9264	2	5.80141	0.61747	-0.000291313	4.68244	ILMN_19650	TCP11	6	Homo sapiens t-complex 11 homolog (mouse) (TCP11), transcript variant 1, mRNA.	D6S230E; MGC111103; KIAA0229	NM_001093728.1
ILMN_1662126	MATN4	-5.62077	2	3.16395	0.748494	0	-4.48768	2	0.00734719	0.665663	0.000291313	0.798411	ILMN_5535	MATN4	20	Homo sapiens matrilin 4 (MATN4), transcript variant 3, mRNA.	FLJ14417; HE6WCR54	NM_030592.1
ILMN_1662128	ISY1	209.251	2	41.183	0	0	280.462	2	36.0672	0	3.77222	1.34032	ILMN_17522	ISY1	3	Homo sapiens ISY1 splicing factor homolog (S. cerevisiae) (ISY1), mRNA.	KIAA1160	NM_020701.2
ILMN_1662140	SGPP2	19.494	2	10.7161	0.0331325	0	24.6212	2	3.21014	0.0271084	0.000291313	1.26302	ILMN_4626	SGPP2	2	Homo sapiens sphingosine-1-phosphate phosphotase 2 (SGPP2), mRNA.	SPP2; FLJ39004	NM_152386.2
ILMN_1662144	CPT1B	-0.832437	2	3.4628	0.384036	0	0.877577	2	0.500611	0.275602	0.000291313	-1.05423	ILMN_13033	CPT1B		Homo sapiens carnitine palmitoyltransferase 1B (muscle) (CPT1B), nuclear gene encoding mitochondrial protein, transcript variant 4, mRNA.	CPT1-M; KIAA1670; M-CPT1	NM_152247.1
ILMN_1662147	MANEAL	198.813	2	0.758583	0	0	157.56	2	0.0550637	0	-4.46755	0.792501	ILMN_11393	MANEAL	1	Homo sapiens mannosidase, endo-alpha-like (MANEAL), transcript variant 1, mRNA.	RP11-109P14.3; MGC78681; FLJ31434	NM_001031740.1
ILMN_1662154	SLC22A12	-7.98551	2	4.4375	0.914157	0	-3.52179	2	2.73147	0.561747	0.000291313	0.441022	ILMN_8969	SLC22A12	11	Homo sapiens solute carrier family 22 (organic anion/urate transporter), member 12 (SLC22A12), transcript variant 1, mRNA.	OAT4L; URAT1; RST	NM_144585.2
ILMN_1662155	PRKCZ	-2.97035	2	5.21056	0.542169	0	-4.56583	2	0.488924	0.668675	-0.000291313	1.53714	ILMN_21521	PRKCZ	1	Homo sapiens protein kinase C, zeta (PRKCZ), transcript variant 2, mRNA.	PKC2	NM_001033581.1
ILMN_1662161	TBC1D13	231.678	2	16.6151	0	0	267.047	2	7.16341	0	1.55535	1.15267	ILMN_7332	TBC1D13	9	Homo sapiens TBC1 domain family, member 13 (TBC1D13), mRNA.	RP11-545E17.5; FLJ10743	NM_018201.2
ILMN_1662166	PTK7	211.432	2	24.9218	0	0	136.747	2	12.7988	0.00150602	-17.277	0.646768	ILMN_898	PTK7	6	Homo sapiens PTK7 protein tyrosine kinase 7 (PTK7), transcript variant PTK7-4, mRNA.	CCK4	NM_152882.2
ILMN_1662168	SP3	0.36167	2	2.06003	0.311747	0	6.46119	2	2.59545	0.131024	0.000291313	17.8649	ILMN_15345	SP3	2	Homo sapiens Sp3 transcription factor (SP3), transcript variant 1, mRNA.	DKFZp686O1631; SPR-2	NM_003111.3
ILMN_1662174	ORMDL3	93.7826	2	7.69931	0.00451807	0	115.638	2	28.4275	0.00301205	0.000291313	1.23304	ILMN_12329	ORMDL3	17	Homo sapiens ORM1-like 3 (S. cerevisiae) (ORMDL3), mRNA.		NM_139280.1
ILMN_1662188	WNT11	126.327	2	3.23933	0.00150602	0	102.626	2	4.07904	0.00301205	-1.39348	0.812384	ILMN_14896	WNT11	11	Homo sapiens wingless-type MMTV integration site family, member 11 (WNT11), mRNA.	MGC141948; HWNT11; MGC141946	NM_004626.2
ILMN_1662192	ZNF248	101.912	2	2.04189	0.00301205	0	116.488	2	5.4466	0.00301205	0.000291313	1.14302	ILMN_27704	ZNF248	10	Homo sapiens zinc finger protein 248 (ZNF248), mRNA.	KIAA0137; bA162G10.3; MGC131882	NM_021045.1
ILMN_1662198	RANGAP1	3188.49	2	290.396	0	0	2191.99	2	54.3095	0	-27.5522	0.687468	ILMN_15153	RANGAP1	22	Homo sapiens Ran GTPase activating protein 1 (RANGAP1), mRNA.	SD; MGC20266; KIAA1835; Fug1	NM_002883.2
ILMN_1662232	DCTN2	3536.06	2	430.36	0	0	4411.16	2	47.1407	0	9.59153	1.24748	ILMN_11887	DCTN2	12	Homo sapiens dynactin 2 (p50) (DCTN2), mRNA.	DCTN50; RBP50; DYNAMITIN	NM_006400.3
ILMN_1662243	ING1	473.03	2	48.8785	0	0	404.328	2	23.6889	0	-2.88792	0.854762	ILMN_2492	ING1	13	Homo sapiens inhibitor of growth family, member 1 (ING1), transcript variant 1, mRNA.	p33ING1; p33; p47ING1a; p33ING1b; p47; p24ING1c	NM_198219.1
ILMN_1662256	PARP6	8.71758	2	4.99023	0.105422	0	11.6946	2	1.62286	0.0707831	0.000291313	1.3415	ILMN_5118	PARP6	15	Homo sapiens poly (ADP-ribose) polymerase family, member 6 (PARP6), mRNA.	MGC131971	NM_020214.2
ILMN_1662263	MDP-1	324.199	2	113.517	0	0	326.8	2	4.12332	0	0.000291313	1.00802	ILMN_24280	MDP-1	14	Homo sapiens magnesium-dependent phosphatase 1 (MDP-1), mRNA.	MGC5987	NM_138476.2
ILMN_1662280	GDF1	-1.44274	2	1.686	0.423193	0	-3.45234	2	0.135806	0.558735	-0.000291313	2.3929	ILMN_30251	GDF1		Homo sapiens growth differentiation factor 1 (GDF1), mRNA.		NM_001492.4
ILMN_1662302	IL28A	-6.42276	2	3.35414	0.807229	0	-4.7765	2	0.425789	0.679217	0.000291313	0.743684	ILMN_4214	IL28A	19	Homo sapiens interleukin 28A (interferon, lambda 2) (IL28A), mRNA.	IFNL2; IL-28A	NM_172138.1
ILMN_1662306	RABL3	361.174	2	15.8465	0	0	458.617	2	52.7467	0	5.61034	1.2698	ILMN_23148	RABL3	3	Homo sapiens RAB, member of RAS oncogene family-like 3 (RABL3), mRNA.	MGC23920	NM_173825.3
ILMN_1662316	VPS33A	309.838	2	27.7786	0	0	428.012	2	20.1348	0	21.6618	1.38141	ILMN_12833	VPS33A	12	Homo sapiens vacuolar protein sorting 33 homolog A (S. cerevisiae) (VPS33A), mRNA.	FLJ23187; FLJ22395	NM_022916.4
ILMN_1662318	CCDC59	2389.82	2	166.992	0	0	2273.7	2	78.6063	0	-0.000291313	0.951411	ILMN_12564	CCDC59		Homo sapiens coiled-coil domain containing 59 (CCDC59), mRNA.	FLJ10294; HSPC128	NM_014167.2
ILMN_1662322	ANXA7	-5.67727	2	3.76112	0.769578	0	0.251528	2	0.517731	0.310241	0.000291313	-0.0443044	ILMN_14787	ANXA7	10	Homo sapiens annexin A7 (ANXA7), transcript variant 2, mRNA.	ANX7; SNX	NM_004034.1
ILMN_1662328	CNNM3	460.079	2	46.1348	0	0	332.159	2	11.9049	0	-16.7172	0.72196	ILMN_18226	CNNM3	2	Homo sapiens cyclin M3 (CNNM3), transcript variant 1, mRNA.	DKFZp434I1016; ACDP3; FLJ20018	NM_017623.4
ILMN_1662331	PDSS2	1114.08	2	145.027	0	0	1364.97	2	39.86	0	6.5365	1.22521	ILMN_28793	PDSS2	6	Homo sapiens prenyl (decaprenyl) diphosphate synthase, subunit 2 (PDSS2), mRNA.	DLP1; hDLP1; C6orf210; bA59I9.3	NM_020381.2
ILMN_1662334	DNAJA3	3716.7	2	241.869	0	0	4071.12	2	247.507	0	0.250868	1.09536	ILMN_10747	DNAJA3	16	Homo sapiens DnaJ (Hsp40) homolog, subfamily A, member 3 (DNAJA3), mRNA.	TID1; FLJ45758; hTid-1	NM_005147.3
ILMN_1662340	ZNF358	513.585	2	14.8068	0	0	469.675	2	22.6951	0	-0.000291313	0.914502	ILMN_19612	ZNF358	19	Homo sapiens zinc finger protein 358 (ZNF358), mRNA.	ZFEND; FLJ10390	NM_018083.4
ILMN_1662358	MX1	431.868	2	33.0635	0	0	1120.31	2	12.9504	0	350.901	2.5941	ILMN_16332	MX1	21	Homo sapiens myxovirus (influenza virus) resistance 1, interferon-inducible protein p78 (mouse) (MX1), mRNA.	MxA; IFI78; MX; IFI-78K	NM_002462.2
ILMN_1662362	LGR6	-6.03226	2	2.97781	0.783133	0	-6.14367	2	2.43569	0.78012	-0.000291313	1.01847	ILMN_9153	LGR6	1	Homo sapiens leucine-rich repeat-containing G protein-coupled receptor 6 (LGR6), transcript variant 1, mRNA.	VTS20631; GPCR; FLJ14471	NM_001017403.1
ILMN_1662364	AARS	6086.36	2	1075.59	0	0	7956.9	2	177.968	0	7.68325	1.30733	ILMN_29917	AARS	16	Homo sapiens alanyl-tRNA synthetase (AARS), mRNA.		NM_001605.2
ILMN_1662378	GFRA4	28.7674	2	3.14263	0.0195783	0	22.6458	2	3.71979	0.0286145	-0.000291313	0.787202	ILMN_24592	GFRA4	20	Homo sapiens GDNF family receptor alpha 4 (GFRA4), transcript variant 2, mRNA.		NM_145762.2
ILMN_1662383	ZRANB2	289.428	2	24.611	0	0	326.5	2	34.4031	0	0.069934	1.12809	ILMN_23948	ZRANB2	1	Homo sapiens zinc finger, RAN-binding domain containing 2 (ZRANB2), transcript variant 2, mRNA.	DKFZp686J1831; ZIS1; FLJ41119; ZIS; DKFZp686N09117; ZNF265; ZIS2	NM_005455.3
ILMN_1662390	ASPHD1	125.405	2	9.99686	0.00150602	0	76.5336	2	16.5034	0.0060241	-8.88858	0.610292	ILMN_11756	ASPHD1	16	Homo sapiens aspartate beta-hydroxylase domain containing 1 (ASPHD1), mRNA.		NM_181718.3
ILMN_1662417	LRPPRC	1147.7	2	183.762	0	0	1119.43	2	72.5624	0	-0.000291313	0.975369	ILMN_23753	LRPPRC	2	Homo sapiens leucine-rich PPR-motif containing (LRPPRC), mRNA.	GP130; CLONE-23970; LRP130; LSFC	NM_133259.2
ILMN_1662419	COX7A1	-2.03272	2	0.893049	0.465361	0	-2.29879	2	1.15643	0.454819	-0.000291313	1.1309	ILMN_5679	COX7A1	19	Homo sapiens cytochrome c oxidase subunit VIIa polypeptide 1 (muscle) (COX7A1), mRNA.	COX7AH; COX7A; COX7AM	NM_001864.2
ILMN_1662426	AP2S1	4897.12	2	444.257	0	0	3613.46	2	71.3161	0	-18.3299	0.737875	ILMN_23048	AP2S1	19	Homo sapiens adaptor-related protein complex 2, sigma 1 subunit (AP2S1), transcript variant AP17, mRNA.	AP17; CLAPS2; AP17-DELTA	NM_004069.3
ILMN_1662432	OPA3	6.15965	2	4.10891	0.135542	0	5.50423	2	7.61901	0.144578	-0.000291313	0.893594	ILMN_11296	OPA3	19	Homo sapiens optic atrophy 3 (autosomal recessive, with chorea and spastic paraplegia) (OPA3), transcript variant 2, mRNA.	FLJ25932; MGC75494; MGA3; FLJ22187	NM_025136.1
ILMN_1662438	SOD1	15944.1	2	960.732	0	0	19544.8	2	638.069	0	10.1031	1.22583	ILMN_14302	SOD1	21	Homo sapiens superoxide dismutase 1, soluble (SOD1), mRNA.	ALS1; IPOA; SOD; homodimer; ALS	NM_000454.4
ILMN_1662451	FCER2	-0.0266318	2	3.12319	0.337349	0	-5.55607	2	2.94241	0.731928	-0.000291313	208.625	ILMN_12030	FCER2	19	Homo sapiens Fc fragment of IgE, low affinity II, receptor for (CD23) (FCER2), mRNA.	CLEC4J; CD23A; FCE2; CD23; IGEBF	NM_002002.3
ILMN_1662470	C10orf35	883.722	2	63.1569	0	0	1937.15	2	34.5988	0	350.901	2.19204	ILMN_13661	C10ORF35	10	Homo sapiens chromosome 10 open reading frame 35 (C10orf35), mRNA.		NM_145306.2
ILMN_1662481	HTN1	-4.18266	2	5.46075	0.618976	0	-10.4916	2	6.06941	0.975904	-0.000291313	2.50836	ILMN_12927	HTN1	4	Homo sapiens histatin 1 (HTN1), mRNA.	HIS1	NM_002159.2
ILMN_1662483	SMA5	16.227	2	5.24361	0.0466867	0	17.99	2	1.19253	0.0361446	0.000291313	1.10865	ILMN_35579	SMA5	5	Homo sapiens SMA5 (SMA5), mRNA.		NM_021036.1
ILMN_1662484	CLDN18	51.7899	2	0.968449	0.0105422	0	43.864	2	1.16491	0.0165663	-0.000291313	0.846961	ILMN_19608	CLDN18	3	Homo sapiens claudin 18 (CLDN18), transcript variant 2, mRNA.		NM_001002026.2
ILMN_1662488	MED23	17.2876	2	1.77303	0.0406627	0	21.7394	2	2.25116	0.0301205	0.000291313	1.25751	ILMN_8939	MED23	6	Homo sapiens mediator complex subunit 23 (MED23), transcript variant 2, mRNA.	MED23; DKFZp434H0117; CRSP3; DRIP130; CRSP133; CRSP130; SUR2	NM_015979.2
ILMN_1662492	GDNF	19.6165	2	0.362642	0.0331325	0	13.8338	2	4.79111	0.0512048	-0.000291313	0.705211	ILMN_19376	GDNF	5	Homo sapiens glial cell derived neurotrophic factor (GDNF), transcript variant 1, mRNA.	HFB1-GDNF; ATF1; ATF2	NM_000514.2
ILMN_1662506	LOC392395	-1.42564	2	1.48319	0.423193	0	-2.782	2	1.59323	0.49247	-0.000291313	1.9514	ILMN_16315	LOC392395		Homo sapiens similar to hemicentin (LOC392395), mRNA.		NM_001013664.1
ILMN_1662507	AKR1C1	-8.38119	2	4.74489	0.924699	0	-11.2282	2	5.29821	0.987952	-0.000291313	1.33969	ILMN_21740	AKR1C1	10	Homo sapiens aldo-keto reductase family 1, member C1 (dihydrodiol dehydrogenase 1; 20-alpha (3-alpha)-hydroxysteroid dehydrogenase) (AKR1C1), mRNA.	C9; 2-ALPHA-HSD; MBAB; H-37; DDH1; HAKRC; DD1; MGC8954; 20-ALPHA-HSD; DDH	NM_001353.5
ILMN_1662523	C3	14.0133	2	5.14647	0.0527108	0	7.60242	2	4.33742	0.114458	-0.000291313	0.542515	ILMN_33011	C3	19	Homo sapiens complement component 3 (C3), mRNA.	ASP; ARMD9; CPAMD1	NM_000064.2
ILMN_1662524	IL8RA	2.6477	2	3.68612	0.218373	0	5.60766	2	0.970181	0.143072	0.000291313	2.11794	ILMN_2119	IL8RA	2	Homo sapiens interleukin 8 receptor, alpha (IL8RA), mRNA.	CMKAR1; CKR-1; C-C; C-C-CKR-1; IL8RBA; IL8R1; CDw128a; CD128; C-C CKR-1; CXCR1; CD181	NM_000634.2
ILMN_1662556	GALNT10	14.8239	2	1.57707	0.0496988	0	12.2228	2	4.23785	0.064759	-0.000291313	0.824537	ILMN_6457	GALNT10	5	Homo sapiens UDP-N-acetyl-alpha-D-galactosamine:polypeptide N-acetylgalactosaminyltransferase 10 (GalNAc-T10) (GALNT10), transcript variant 1, mRNA.	GalNAcT10; FLJ00205; FLJ11715; pp-GalNAc-T10; DKFZp586H0623	NM_198321.2
ILMN_1662578	C1GALT1	187	2	31.7464	0	0	191.462	2	14.9485	0	0.000291313	1.02386	ILMN_20257	C1GALT1	7	Homo sapiens core 1 synthase, glycoprotein-N-acetylgalactosamine 3-beta-galactosyltransferase, 1 (C1GALT1), mRNA.	T-synthase; C1GALT	NM_020156.1
ILMN_1662587	PNPLA7	19.1804	2	6.73126	0.0331325	0	50.5117	2	11.1471	0.0150602	5.52665	2.6335	ILMN_22221	PNPLA7	9	Homo sapiens patatin-like phospholipase domain containing 7 (PNPLA7), mRNA.	FLJ44279; NTE-R1; FLJ43070; C9orf111; NTEL1; FLJ31318; RP11-48C7.2	NM_152286.2
ILMN_1662618	SQSTM1	4231.15	2	383.983	0	0	7559.76	2	1274.12	0	21.417	1.78669	ILMN_22135	SQSTM1	5	Homo sapiens sequestosome 1 (SQSTM1), mRNA.	OSIL; p62B; p60; ZIP3; PDB3; p62; A170	NM_003900.3
ILMN_1662619	TFPI	32.9819	2	1.00136	0.0180723	0	38.6955	2	4.24727	0.0165663	0.000291313	1.17324	ILMN_1429	TFPI	2	Homo sapiens tissue factor pathway inhibitor (lipoprotein-associated coagulation inhibitor) (TFPI), transcript variant 1, mRNA.	TFI; LACI; EPI	NM_006287.4
ILMN_1662629	SPAG11B	10.4817	2	9.20827	0.0737952	0	3.80884	2	2.35465	0.170181	-0.000291313	0.363379	ILMN_43154	SPAG11B	8	Homo sapiens sperm associated antigen 11B (SPAG11B), transcript variant E, mRNA.	MGC61846; EP2C; EP2; HE2C; EP2D; SPAG11; SPAG11B; HE2	NM_058207.2
ILMN_1662658	PUS1	2349.8	2	385.178	0	0	2096.57	2	140.166	0	-0.000291313	0.892231	ILMN_6169	PUS1	12	Homo sapiens pseudouridylate synthase 1 (PUS1), transcript variant 2, mRNA.	MLASA; MGC11268	NM_001002019.1
ILMN_1662668	APC	2.34271	2	11.4168	0.240964	0	11.5733	2	0.318268	0.0722891	0.000291313	4.94014	ILMN_18629	APC	5	Homo sapiens adenomatous polyposis coli (APC), mRNA.	DP2.5; FAP; GS; DP3; DP2; FPC	NM_000038.3
ILMN_1662675	ADAM2	2.51243	2	5.46801	0.233434	0	4.426	2	7.63716	0.162651	0.000291313	1.76164	ILMN_18772	ADAM2	8	Homo sapiens ADAM metallopeptidase domain 2 (fertilin beta) (ADAM2), mRNA.	PH30; CRYN1; FTNB; CRYN2; PH-30b	NM_001464.3
ILMN_1662681	AMBRA1	21.6401	2	1.66176	0.0271084	0	26.858	2	2.20655	0.0271084	0.000291313	1.24112	ILMN_523	AMBRA1	11	Homo sapiens autophagy/beclin-1 regulator 1 (AMBRA1), mRNA.	WDR94; FLJ20294; AMBRA1; MGC33725; KIAA1736	NM_017749.2
ILMN_1662686	USPL1	416.843	2	45.7808	0	0	445.328	2	30.0279	0	0.000291313	1.06834	ILMN_27577	USPL1	13	Homo sapiens ubiquitin specific peptidase like 1 (USPL1), mRNA.	D13S106E; C13orf22; DKFZp781K2286; RP11-121O19.1; bA121O19.1; FLJ32952	NM_005800.3
ILMN_1662687	PKN1	19.7768	2	4.67975	0.0331325	0	20.4504	2	9.72939	0.0301205	0.000291313	1.03406	ILMN_29215	PKN1	19	Homo sapiens protein kinase N1 (PKN1), transcript variant 2, mRNA.	PRKCL1; PAK1; PKN; DBK; PRK1; MGC46204	NM_002741.3
ILMN_1662707	SEC24B	-5.19876	2	1.22158	0.730422	0	-3.56882	2	1.39528	0.564759	0.000291313	0.686475	ILMN_13898	SEC24B	4	Homo sapiens SEC24 family, member B (S. cerevisiae) (SEC24B), transcript variant 1, mRNA.	MGC48822; SEC24	NM_006323.2
ILMN_1662731	COL4A3	2.34543	2	3.82538	0.237952	0	-1.41455	2	1.66657	0.394578	-0.000291313	-0.603109	ILMN_138414	COL4A3	2	Homo sapiens collagen, type IV, alpha 3 (Goodpasture antigen) (COL4A3), transcript variant 5, mRNA.		NM_031365.2
ILMN_1662734	OTOP3	-0.871751	2	5.11917	0.384036	0	-0.437611	2	2.84451	0.338855	0.000291313	0.501991	ILMN_15329	OTOP3	17	Homo sapiens otopetrin 3 (OTOP3), mRNA.		NM_178233.1
ILMN_1662735	OR5K2	7.3059	2	0.380688	0.115964	0	4.61817	2	1.06138	0.158133	-0.000291313	0.632114	ILMN_24926	OR5K2	3	Homo sapiens olfactory receptor, family 5, subfamily K, member 2 (OR5K2), mRNA.	OR3-9	NM_001004737.1
ILMN_1662738	ACSM3	184.363	2	8.10226	0	0	139.344	2	1.92263	0.00150602	-6.50047	0.755813	ILMN_10620	ACSM3	16	Homo sapiens acyl-CoA synthetase medium-chain family member 3 (ACSM3), transcript variant 2, mRNA.	SA; SAH	NM_202000.2
ILMN_1662741	EDG4	351.055	2	3.0218	0	0	438.581	2	23.4392	0	9.09164	1.24932	ILMN_4660	EDG4	19	Homo sapiens endothelial differentiation, lysophosphatidic acid G-protein-coupled receptor, 4 (EDG4), mRNA.	LPAR2; EDG-4; LPA2	NM_004720.4
ILMN_1662747	EVI2A	-3.58884	2	2.2821	0.578313	0	-4.27825	2	2.40965	0.652108	-0.000291313	1.1921	ILMN_29280	EVI2A	17	Homo sapiens ecotropic viral integration site 2A (EVI2A), transcript variant 1, mRNA.	EVDA; EVI2	NM_001003927.1
ILMN_1662768	NHEDC2	76.7004	2	9.37275	0.00451807	0	82.8601	2	5.27892	0.0060241	0.000291313	1.08031	ILMN_6924	NHEDC2	4	Homo sapiens Na+/H+ exchanger domain containing 2 (NHEDC2), mRNA.	FLJ23984; NHA2	NM_178833.3
ILMN_1662777	ZNF208	-7.09866	2	6.62613	0.847892	0	-10.9881	2	3.83514	0.983434	-0.000291313	1.54791	ILMN_22875	ZNF208	19	Homo sapiens zinc finger protein 208 (ZNF208), mRNA.	ZNF95; PMIDP	NM_007153.2
ILMN_1662791	C10orf68	-6.47159	2	2.30097	0.811747	0	-5.96931	2	0.433009	0.766566	0.000291313	0.922387	ILMN_21881	C10ORF68	10	Homo sapiens chromosome 10 open reading frame 68 (C10orf68), mRNA.	FLJ13031; RP11-479G22.1; MGC149767; dJ1104A8.1	NM_024688.1
ILMN_1662799	GPSM3	-1.57831	2	0.183501	0.429217	0	-0.307019	2	0.253712	0.332831	0.000291313	0.194524	ILMN_28125	GPSM3	6	Homo sapiens G-protein signaling modulator 3 (AGS3-like, C. elegans) (GPSM3), mRNA.	C6orf9; G18; G18.1a; G18.2; G18.1b; NG1	NM_022107.1
ILMN_1662801	ZMYM3	7.04518	2	6.77039	0.123494	0	9.85954	2	1.60689	0.0858434	0.000291313	1.39947	ILMN_26373	ZMYM3	X	Homo sapiens zinc finger, MYM-type 3 (ZMYM3), transcript variant 2, mRNA.	ZNF261; DXS6673E; XFIM; MYM; KIAA0385; ZNF198L2	NM_201599.1
ILMN_1662824	MADCAM1	-4.51266	2	3.26181	0.673193	0	-3.08692	2	1.14989	0.519578	0.000291313	0.684058	ILMN_1646	MADCAM1	19	Homo sapiens mucosal vascular addressin cell adhesion molecule 1 (MADCAM1), transcript variant 1, mRNA.	MACAM1	NM_130760.2
ILMN_1662837	WFIKKN2	-5.04887	2	6.9387	0.701807	0	-9.83505	2	1.07531	0.960843	-0.000291313	1.94797	ILMN_18996	WFIKKN2	17	Homo sapiens WAP, follistatin/kazal, immunoglobulin, kunitz and netrin domain containing 2 (WFIKKN2), mRNA.	WFIKKNRP	NM_175575.5
ILMN_1662839	PLEKHA1	1558.19	2	125.465	0	0	1697.46	2	120.136	0	0.000291313	1.08938	ILMN_16110	PLEKHA1	10	Homo sapiens pleckstrin homology domain containing, family A (phosphoinositide binding specific) member 1 (PLEKHA1), transcript variant 2, mRNA.	TAPP1	NM_001001974.1
ILMN_1662843	CD53	-1.25722	2	3.46249	0.411145	0	3.69125	2	3.01223	0.171687	0.000291313	-2.93604	ILMN_19519	CD53	1	Homo sapiens CD53 molecule (CD53), transcript variant 2, mRNA.	TSPAN25; MOX44	NM_000560.3
ILMN_1662846	GPR160	285.843	2	49.091	0	0	208.829	2	25.2122	0	-4.64724	0.730572	ILMN_931	GPR160	3	Homo sapiens G protein-coupled receptor 160 (GPR160), mRNA.	GPCR150; GPCR1	NM_014373.1
ILMN_1662848	TXNDC15	99.2732	2	20.9155	0.00301205	0	113.904	2	25.0516	0.00301205	0.000291313	1.14738	ILMN_16829	TXNDC15	5	Homo sapiens thioredoxin domain containing 15 (TXNDC15), mRNA.	FLJ22625; C5orf14; UNQ335	NM_024715.3
ILMN_1662865	FLJ11151	11.2176	2	0.899	0.0677711	0	8.98867	2	1.49565	0.0933735	-0.000291313	0.8013	ILMN_19186	FLJ11151	16	Homo sapiens hypothetical protein FLJ11151 (FLJ11151), transcript variant 1, mRNA.	CSTP1	NM_018340.2
ILMN_1662884	TSLP	4.26402	2	6.53989	0.176205	0	-4.19501	2	0.281676	0.641566	-0.000291313	-0.983816	ILMN_29445	TSLP	5	Homo sapiens thymic stromal lymphopoietin (TSLP), transcript variant 1, mRNA.		NM_033035.3
ILMN_1662886	KLHL34	-0.0555462	2	0.0201291	0.334337	0	-2.80696	2	4.5299	0.49247	-0.000291313	50.5337	ILMN_18921	KLHL34	X	Homo sapiens kelch-like 34 (Drosophila) (KLHL34), mRNA.	FLJ34960; RP11-450P7.3; MGC125650	NM_153270.1
ILMN_1662902	ANKRD13D	3.99613	2	1.43442	0.182229	0	2.31545	2	2.29217	0.215361	-0.000291313	0.579423	ILMN_13471	ANKRD13D	11	Homo sapiens ankyrin repeat domain 13 family, member D (ANKRD13D), mRNA. XM_945571	MGC50828	NM_207354.1
ILMN_1662910	SFXN3	36.3542	2	7.9288	0.0150602	0	52.9349	2	4.62773	0.0120482	0.518261	1.45609	ILMN_3166	SFXN3	10	Homo sapiens sideroflexin 3 (SFXN3), mRNA.	SFX3; BA108L7.2	NM_030971.3
ILMN_1662914	CTAGE5	-6.58349	2	3.28697	0.816265	0	-3.89034	2	1.44248	0.608434	0.000291313	0.590924	ILMN_28819	CTAGE5	14	Homo sapiens CTAGE family, member 5 (CTAGE5), transcript variant 2, mRNA.	MEA6; MGEA11; MGEA; MGEA6	NM_203354.2
ILMN_1662917	LMO1	-2.70677	2	1.73531	0.519578	0	-0.13278	2	10.1415	0.329819	0.000291313	0.0490547	ILMN_29972	LMO1	11	Homo sapiens LIM domain only 1 (rhombotin 1) (LMO1), mRNA.	RBTN1; MGC116692; TTG1; RHOM1	NM_002315.1
ILMN_1662932	LCP1	20.0446	2	2.95548	0.0301205	0	172.37	2	11.7672	0	350.901	8.59934	ILMN_28547	LCP1	13	Homo sapiens lymphocyte cytosolic protein 1 (L-plastin) (LCP1), mRNA.	L-PLASTIN; PLS2; FLJ26114; CP64; DKFZp781A23186; FLJ39956; LC64P; FLJ25423	NM_002298.2
ILMN_1662934	UBE2I	7.98398	2	4.46251	0.10994	0	2.93107	2	1.05356	0.201807	-0.000291313	0.36712	ILMN_27308	UBE2I	16	Homo sapiens ubiquitin-conjugating enzyme E2I (UBC9 homolog, yeast) (UBE2I), transcript variant 3, mRNA.	UBC9; P18; C358B7.1	NM_194260.1
ILMN_1662935	C1QTNF7	-1.38162	2	2.67009	0.423193	0	-4.83335	2	3.16736	0.685241	-0.000291313	3.49832	ILMN_28062	C1QTNF7	4	Homo sapiens C1q and tumor necrosis factor related protein 7 (C1QTNF7), mRNA.	ZACRP7; CTRP7	NM_031911.3
ILMN_1662944	PON1	0.545668	2	1.56331	0.299699	0	1.96026	2	1.86177	0.231928	0.000291313	3.59241	ILMN_24208	PON1	7	Homo sapiens paraoxonase 1 (PON1), mRNA.	ESA; PON	NM_000446.3
ILMN_1662949	FAM132A	4.18559	2	4.00415	0.182229	0	1.58528	2	1.00696	0.248494	-0.000291313	0.378747	ILMN_44524	FAM132A	1	Homo sapiens family with sequence similarity 132, member A (FAM132A), mRNA.	MGC105127; C1QDC2	NM_001014980.1
ILMN_1662950	EPS8L1	-1.40049	2	1.97493	0.417169	0	1.36855	2	0.971062	0.256024	0.000291313	-0.977193	ILMN_15325	EPS8L1	19	Homo sapiens EPS8-like 1 (EPS8L1), transcript variant 1, mRNA.	DRC3; PP10566; EPS8R1; FLJ20258; MGC23164; MGC4642	NM_133180.2
ILMN_1662952	ZNF687	44.1275	2	0.252597	0.0120482	0	26.9259	2	2.52197	0.0271084	-0.92278	0.610184	ILMN_24389	ZNF687	1	Homo sapiens zinc finger protein 687 (ZNF687), mRNA.	RP11-126K1.3; KIAA1441; DKFZp781I1719	NM_020832.1
ILMN_1662954	CCT7	1174.66	2	222.789	0	0	1139.48	2	76.3868	0	-0.000291313	0.97005	ILMN_22959	CCT7	2	Homo sapiens chaperonin containing TCP1, subunit 7 (eta) (CCT7), transcript variant 1, mRNA.	Ccth; MGC110985; CCT-ETA; Nip7-1; TCP-1-eta	NM_006429.2
ILMN_1662961	GRHL3	-0.112195	2	1.12698	0.337349	0	0.000247288	2	1.63639	0.319277	0.000291313	-0.00220409	ILMN_27213	GRHL3	1	Homo sapiens grainyhead-like 3 (Drosophila) (GRHL3), transcript variant 2, mRNA.	SOM; TFCP2L4; MGC46624	NM_198173.1
ILMN_1662962	COLEC10	-2.18671	2	7.85767	0.490964	0	-5.21312	2	3.6772	0.712349	-0.000291313	2.384	ILMN_6397	COLEC10	8	Homo sapiens collectin sub-family member 10 (C-type lectin) (COLEC10), mRNA.	MGC118794; CLL1; MGC118795	NM_006438.2
ILMN_1662963	PSD2	3.94986	2	3.64535	0.182229	0	6.04406	2	6.40717	0.135542	0.000291313	1.53019	ILMN_23107	PSD2	5	Homo sapiens pleckstrin and Sec7 domain containing 2 (PSD2), mRNA.	DKFZp761B0514	NM_032289.2
ILMN_1662973	CD82	66.7565	2	0.0444512	0.0060241	0	87.799	2	2.82818	0.00451807	1.63402	1.31521	ILMN_24985	CD82	11	Homo sapiens CD82 molecule (CD82), transcript variant 1, mRNA.	SAR2; TSPAN27; GR15; ST6; KAI1; 4F9; C33; IA4; R2	NM_002231.3
ILMN_1663002	STOML2	5850.82	2	561.022	0	0	4591.12	2	22.9556	0	-11.3817	0.784697	ILMN_21419	STOML2	9	Homo sapiens stomatin (EPB72)-like 2 (STOML2), mRNA.	HSPC108; SLP-2	NM_013442.1
ILMN_1663015	HIF3A	0.38785	2	0.173419	0.308735	0	4.79479	2	3.61319	0.158133	0.000291313	12.3625	ILMN_137886	HIF3A	19	Homo sapiens hypoxia inducible factor 3, alpha subunit (HIF3A), transcript variant 2, mRNA.	MOP7; HIF-3A2; HIF-3A4; PASD7; IPAS; HIF-3A	NM_022462.3
ILMN_1663024	S100A1L	8.40351	2	6.31693	0.108434	0	4.68327	2	0.726341	0.158133	-0.000291313	0.557299	ILMN_37140	S100A1L	3	Homo sapiens Protein S100-A1-like (S100A1L), mRNA.		NM_001080537.1
ILMN_1663032	FNDC4	80.975	2	30.7256	0.00451807	0	83.6325	2	4.23329	0.0060241	0.000291313	1.03282	ILMN_8274	FNDC4	2	Homo sapiens fibronectin type III domain containing 4 (FNDC4), mRNA.	FLJ22362; FRCP1	NM_022823.1
ILMN_1663033	TMEM129	50.6562	2	10.0842	0.0105422	0	34.6555	2	5.14144	0.0195783	-0.188739	0.684131	ILMN_23838	TMEM129	4	Homo sapiens transmembrane protein 129 (TMEM129), mRNA.	D4S2561E; FLJ25600	NM_138385.2
ILMN_1663035	SREBF1	675.357	2	26.6536	0	0	1209.93	2	16.3316	0	103.43	1.79154	ILMN_21143	SREBF1	17	Homo sapiens sterol regulatory element binding transcription factor 1 (SREBF1), transcript variant 1, mRNA.	SREBP1	NM_001005291.1
ILMN_1663037	LRRC4C	-5.84065	2	2.73025	0.775602	0	-2.68443	2	6.01929	0.48494	0.000291313	0.459611	ILMN_4553	LRRC4C	11	Homo sapiens leucine rich repeat containing 4C (LRRC4C), mRNA.	KIAA1580; NGL1; NGL-1	NM_020929.1
ILMN_1663042	SDC4	250.566	2	45.7404	0	0	249.465	2	2.3602	0	-0.000291313	0.995607	ILMN_24480	SDC4	20	Homo sapiens syndecan 4 (SDC4), mRNA.	MGC22217; SYND4	NM_002999.2
ILMN_1663052	FLJ41821	-6.50174	2	4.49929	0.811747	0	-3.89817	2	2.39082	0.608434	0.000291313	0.599558	ILMN_13580	FLJ41821	2	Homo sapiens FLJ41821 protein (FLJ41821), mRNA.		NM_001001697.1
ILMN_1663062	CCDC67	-3.25172	2	0.964282	0.552711	0	-0.0897333	2	1.07385	0.325301	0.000291313	0.0275956	ILMN_29506	CCDC67	11	Homo sapiens coiled-coil domain containing 67 (CCDC67), mRNA.	FLJ25393	NM_181645.3
ILMN_1663068	MGC33556	1.63624	2	9.75277	0.246988	0	8.26011	2	10.9511	0.108434	0.000291313	5.04822	ILMN_28832	MGC33556	1	Homo sapiens hypothetical LOC339541 (MGC33556), mRNA.		NM_001004307.1
ILMN_1663080	LFNG	244.92	2	8.72877	0	0	102.289	2	6.41526	0.00301205	-66.6417	0.417643	ILMN_17286	LFNG	7	Homo sapiens LFNG O-fucosylpeptide 3-beta-N-acetylglucosaminyltransferase (LFNG), transcript variant 1, mRNA.	SCDO3	NM_001040167.1
ILMN_1663081	LOC440925	61.464	2	5.13164	0.00903614	0	50.5918	2	0.880723	0.0150602	-0.000291313	0.823113	ILMN_19833	LOC440925	2	Homo sapiens hypothetical gene supported by AK123485 (LOC440925), mRNA.		NM_001013712.1
ILMN_1663092	CITED2	437.714	2	19.5715	0	0	632.704	2	42.0575	0	31.5226	1.44548	ILMN_21636	CITED2	6	Homo sapiens Cbp/p300-interacting transactivator, with Glu/Asp-rich carboxy-terminal domain, 2 (CITED2), mRNA.	P35SRJ; MRG1	NM_006079.3
ILMN_1663099	UBE2B	29.4235	2	1.78724	0.0195783	0	39.9642	2	2.9577	0.0165663	0.000291313	1.35824	ILMN_19013	UBE2B	5	Homo sapiens ubiquitin-conjugating enzyme E2B (RAD6 homolog) (UBE2B), mRNA.	RAD6B; E2-17kDa; UBC2; HHR6B; HR6B	NM_003337.2
ILMN_1663106	SPTB	4.98135	2	5.38601	0.161145	0	0.573054	2	3.86484	0.295181	-0.000291313	0.11504	ILMN_20595	SPTB	14	Homo sapiens spectrin, beta, erythrocytic (includes spherocytosis, clinical type I) (SPTB), transcript variant 1, mRNA.	HSpTB1	NM_001024858.1
ILMN_1663113	TTLL12	1169.62	2	33.0934	0	0	725.478	2	46.6335	0	-40.6069	0.620271	ILMN_11837	TTLL12	22	Homo sapiens tubulin tyrosine ligase-like family, member 12 (TTLL12), mRNA.	FLJ41795; KIAA0153; dJ526I14.2	NM_015140.2
ILMN_1663118	RASGEF1C	-0.726959	2	1.14118	0.379518	0	1.16429	2	2.56184	0.262048	0.000291313	-1.60159	ILMN_13240	RASGEF1C	5	Homo sapiens RasGEF domain family, member 1C (RASGEF1C), mRNA.	FLJ35841	NM_175062.3
ILMN_1663119	DSC2	1245.16	2	1.23643	0	0	1274.48	2	15.6423	0	0.000291313	1.02355	ILMN_8764	DSC2	18	Homo sapiens desmocollin 2 (DSC2), transcript variant Dsc2b, mRNA.	DGII/III; DKFZp686I11137; CDHF2; ARVD11; DG2; DSC3	NM_004949.2
ILMN_1663131	LYST	-2.0594	2	0.141041	0.466867	0	-3.91157	2	1.54677	0.611446	-0.000291313	1.89937	ILMN_12138	LYST	1	Homo sapiens lysosomal trafficking regulator (LYST), transcript variant 2, mRNA.	CHS; CHS1	NM_001005736.1
ILMN_1663132	ADCK2	1532.32	2	215.847	0	0	1501.2	2	11.3658	0	-0.000291313	0.97969	ILMN_10783	ADCK2	7	Homo sapiens aarF domain containing kinase 2 (ADCK2), mRNA.	MGC20727; AARF	NM_052853.3
ILMN_1663142	CLEC12A	3.14592	2	2.03579	0.207831	0	4.26844	2	6.11048	0.165663	0.000291313	1.35682	ILMN_24114	CLEC12A	12	Homo sapiens C-type lectin domain family 12, member A (CLEC12A), transcript variant 2, mRNA.	CLL1; MICL; CLL-1; DCAL-2; MGC70602	NM_201623.2
ILMN_1663145	NOMO3	95.8468	2	45.9418	0.00451807	0	114.394	2	19.7457	0.00301205	0.000291313	1.1935	ILMN_5042	NOMO3	16	Homo sapiens NODAL modulator 3 (NOMO3), mRNA.	Nomo	NM_001004067.2
ILMN_1663155	ZNF238	-2.67487	2	2.65053	0.518072	0	-7.37545	2	1.23251	0.868976	-0.000291313	2.75732	ILMN_5128	ZNF238	1	Homo sapiens zinc finger protein 238 (ZNF238), transcript variant 1, mRNA.	RP58; ZBTB18; TAZ-1; C2H2-171	NM_205768.1
ILMN_1663156	DDX31	-2.92096	2	5.75174	0.540663	0	-8.75922	2	0.360698	0.930723	-0.000291313	2.99874	ILMN_2241	DDX31	9	Homo sapiens DEAD (Asp-Glu-Ala-Asp) box polypeptide 31 (DDX31), transcript variant 2, mRNA.	helicain B; helicain C; FLJ13633; FLJ14578; helicain A; FLJ23349	NM_138620.1
ILMN_1663158	ZNF174	76.6252	2	11.9249	0.00451807	0	88.0977	2	1.94716	0.00451807	0.000291313	1.14972	ILMN_9056	ZNF174	16	Homo sapiens zinc finger protein 174 (ZNF174), transcript variant 2, mRNA.	ZSCAN8	NM_001032292.1
ILMN_1663160	ZNF337	259.901	2	50.4663	0	0	283.675	2	6.24256	0	0.000291313	1.09147	ILMN_3280	ZNF337	20	Homo sapiens zinc finger protein 337 (ZNF337), mRNA.		NM_015655.2
ILMN_1663171	MATN3	49.8171	2	0.186102	0.0105422	0	30.9887	2	9.22794	0.0225904	-0.928337	0.622049	ILMN_28882	MATN3	2	Homo sapiens matrilin 3 (MATN3), mRNA.	HOA; EDM5	NM_002381.4
ILMN_1663173	LOC442582	14.7391	2	2.33175	0.0496988	0	20.5979	2	0.676401	0.0301205	0.000291313	1.3975	ILMN_5961	LOC442582	7	Homo sapiens STAG3-like (LOC442582), mRNA.	MGC131759	NM_001025202.1
ILMN_1663179	PROCA1	11.6929	2	4.27291	0.0662651	0	11.5812	2	4.12577	0.0722891	-0.000291313	0.990451	ILMN_21242	PROCA1	17	Homo sapiens proline-rich cyclin A1-interacting protein (PROCA1), mRNA.	MGC39650	NM_152465.1
ILMN_1663185	PLEKHA8	12.4292	2	5.77609	0.060241	0	11.5328	2	0.932908	0.0722891	-0.000291313	0.927879	ILMN_12342	PLEKHA8	7	Homo sapiens pleckstrin homology domain containing, family A (phosphoinositide binding specific) member 8 (PLEKHA8), mRNA.	MGC3358; FAPP2	NM_032639.2
ILMN_1663195	MCM7	4963.22	2	185.844	0	0	1956.1	2	153.356	0	-120.64	0.394118	ILMN_1133	MCM7	7	Homo sapiens minichromosome maintenance complex component 7 (MCM7), transcript variant 2, mRNA.	MCM2; CDC47; P1.1-MCM3; P1CDC47; CDABP0042; P85MCM; PNAS-146	NM_182776.1
ILMN_1663213	ITIH5	-7.15585	2	2.71346	0.856928	0	-3.64822	2	0.980405	0.575301	0.000291313	0.509823	ILMN_23064	ITIH5	10	Homo sapiens inter-alpha (globulin) inhibitor H5 (ITIH5), transcript variant 2, mRNA.	DKFZp686F0145; pp14776; MGC10848	NM_032817.3
ILMN_1663220	MRPL22	2123.12	2	370.339	0	0	2020.45	2	65.8414	0	-0.000291313	0.951639	ILMN_29349	MRPL22	5	Homo sapiens mitochondrial ribosomal protein L22 (MRPL22), nuclear gene encoding mitochondrial protein, transcript variant 1, mRNA.	HSPC158; DKFZp781F1071; RPML25; MRP-L25	NM_014180.2
ILMN_1663234	KATNAL1	13.0144	2	7.07846	0.060241	0	17.746	2	4.17887	0.0391566	0.000291313	1.36357	ILMN_18712	KATNAL1	13	Homo sapiens katanin p60 subunit A-like 1 (KATNAL1), transcript variant 2, mRNA.	MGC2599	NM_001014380.1
ILMN_1663257	ATP6V1C1	92.2585	2	5.9329	0.00451807	0	144.136	2	44.8278	0.00150602	2.15595	1.5623	ILMN_12844	ATP6V1C1	8	Homo sapiens ATPase, H+ transporting, lysosomal 42kDa, V1 subunit C1 (ATP6V1C1), mRNA.	VATC; FLJ20057; ATP6D; Vma5; ATP6C	NM_001695.4
ILMN_1663263	EPHA10	16.6566	2	0.0634987	0.0436747	0	14.2006	2	8.93919	0.0512048	-0.000291313	0.852553	ILMN_16282	EPHA10	1	Homo sapiens EPH receptor A10 (EPHA10), transcript variant 2, mRNA.	MGC43817; FLJ33655; FLJ16103	NM_173641.2
ILMN_1663281	ZNF702P	257.123	2	15.6255	0	0	282.676	2	63.518	0	0.000291313	1.09938	ILMN_24422	ZNF702P	19	Homo sapiens zinc finger protein 702 pseudogene (ZNF702P), non-coding RNA.	FLJ12985	NR_003578.1
ILMN_1663327	SOX6	-8.19971	2	2.10135	0.921687	0	-8.50874	2	4.31568	0.924699	-0.000291313	1.03769	ILMN_18791	SOX6	11	Homo sapiens SRY (sex determining region Y)-box 6 (SOX6), transcript variant 1, mRNA.	HSSOX6	NM_017508.1
ILMN_1663347	OTOF	-2.84332	2	5.459	0.518072	0	2.61935	2	2.4445	0.206325	0.000291313	-0.921229	ILMN_8176	OTOF	2	Homo sapiens otoferlin (OTOF), transcript variant 4, mRNA.	DFNB6; DFNB9; FER1L2; NSRD9	NM_194323.1
ILMN_1663356	RPH3A	0.653245	2	2.98841	0.299699	0	4.84828	2	7.65864	0.158133	0.000291313	7.42184	ILMN_13972	RPH3A	12	Homo sapiens rabphilin 3A homolog (mouse) (RPH3A), mRNA.	KIAA0985	NM_014954.2
ILMN_1663370	CCDC62	27.4186	2	8.5744	0.0210843	0	34.2118	2	7.59913	0.0195783	0.000291313	1.24776	ILMN_27533	CCDC62	12	Homo sapiens coiled-coil domain containing 62 (CCDC62), transcript variant 2, mRNA.	aaa; FLJ25432; TSP-NY; FLJ40344	NM_201435.2
ILMN_1663379	FBXL15	538.286	2	101.722	0	0	411.367	2	44.9126	0	-2.84502	0.764217	ILMN_4176	FBXL15	10	Homo sapiens F-box and leucine-rich repeat protein 15 (FBXL15), mRNA.	FLJ16137; Fbl15; MGC11279; FBXO37; PSD	NM_024326.2
ILMN_1663381	TRAF3IP2	49.7665	2	2.49998	0.0105422	0	55.9479	2	4.83268	0.0105422	0.000291313	1.12421	ILMN_13478	TRAF3IP2	6	Homo sapiens TRAF3 interacting protein 2 (TRAF3IP2), transcript variant 1, mRNA.	CIKS; C6orf5; MGC3581; DKFZP586G0522; C6orf6; C6orf4; ACT1	NM_147200.1
ILMN_1663383	GEMIN5	205.993	2	74.9073	0	0	228.708	2	22.8481	0	0.000291313	1.11027	ILMN_28383	GEMIN5	5	Homo sapiens gem (nuclear organelle) associated protein 5 (GEMIN5), mRNA.	DKFZP586M1824; MGC142174	NM_015465.1
ILMN_1663390	CDC20	7271.48	2	1240.1	0	0	2956.82	2	299.468	0	-42.8364	0.406633	ILMN_8354	CDC20	1	Homo sapiens cell division cycle 20 homolog (S. cerevisiae) (CDC20), mRNA.	CDC20A; bA276H19.3; MGC102824; p55CDC	NM_001255.2
ILMN_1663397	CAMK2B	1.3741	2	5.38597	0.268072	0	6.29436	2	0.292114	0.13253	0.000291313	4.58071	ILMN_138775	CAMK2B	7	Homo sapiens calcium/calmodulin-dependent protein kinase (CaM kinase) II beta (CAMK2B), transcript variant 5, mRNA.	CAMKB; CAM2; MGC29528; CAMK2	NM_172081.1
ILMN_1663399	TIMP4	109.848	2	4.13334	0.00301205	0	221.531	2	0.97682	0	64.0704	2.01671	ILMN_9434	TIMP4	3	Homo sapiens TIMP metallopeptidase inhibitor 4 (TIMP4), mRNA.		NM_003256.2
ILMN_1663401	LARP6	625.33	2	136.062	0	0	731.137	2	43.7803	0	0.0820107	1.1692	ILMN_25698	LARP6	15	Homo sapiens La ribonucleoprotein domain family, member 6 (LARP6), transcript variant 2, mRNA.	FLJ11196; ACHN	NM_197958.1
ILMN_1663407	SURF1	901.433	2	68.6221	0	0	956.668	2	70.7874	0	0.000291313	1.06127	ILMN_2148	SURF1	9	Homo sapiens surfeit 1 (SURF1), nuclear gene encoding mitochondrial protein, mRNA.		NM_003172.2
ILMN_1663417	C22orf33	13.818	2	1.42483	0.0527108	0	13.2229	2	2.01926	0.0527108	-0.000291313	0.956937	ILMN_15258	C22ORF33	22	Homo sapiens chromosome 22 open reading frame 33 (C22orf33), mRNA.	EAN57; MGC35206; cE81G9.2	NM_178552.2
ILMN_1663422	RGL4	3.22471	2	7.93756	0.210843	0	4.1246	2	0.981977	0.168675	0.000291313	1.27906	ILMN_28738	RGL4	22	Homo sapiens ral guanine nucleotide dissociation stimulator-like 4 (RGL4), mRNA.	Rgr; MGC119678; MGC119680	NM_153615.1
ILMN_1663425	MED12L	-3.07341	2	2.69261	0.540663	0	-5.91343	2	7.36248	0.763554	-0.000291313	1.92406	ILMN_9923	MED12L	3	Homo sapiens mediator complex subunit 12-like (MED12L), mRNA.	TRALP; TNRC11L; KIAA1635; NOPAR; FLJ46288; TRALPUSH	NM_053002.3
ILMN_1663437	NECAB2	10.3015	2	8.04973	0.0753012	0	12.6358	2	9.68949	0.060241	0.000291313	1.2266	ILMN_12534	NECAB2	16	Homo sapiens N-terminal EF-hand calcium binding protein 2 (NECAB2), mRNA.	EFCBP2; NECAB2	NM_019065.2
ILMN_1663444	LIN7B	61.3778	2	4.50422	0.00903614	0	91.4438	2	5.03342	0.00451807	5.40144	1.48985	ILMN_29543	LIN7B	19	Homo sapiens lin-7 homolog B (C. elegans) (LIN7B), mRNA.	LIN-7B; MALS-2; VELI2	NM_022165.2
ILMN_1663446	SORBS1	-1.53798	2	1.15097	0.429217	0	-6.50528	2	0.0620443	0.807229	-0.000291313	4.22976	ILMN_138678	SORBS1	10	Homo sapiens sorbin and SH3 domain containing 1 (SORBS1), transcript variant 3, mRNA.	SH3P12; DKFZp586P1422; SORB1; R85FL; DKFZp451C066; KIAA1296; FLJ12406; SH3D5; FLAF2; CAP	NM_001034954.1
ILMN_1663447	HNRNPA1	207.559	2	113.71	0	0	195.371	2	1.1552	0	-0.000291313	0.941281	ILMN_137048	HNRNPA1	12	Homo sapiens heterogeneous nuclear ribonucleoprotein A1 (HNRNPA1), transcript variant 2, mRNA.	MGC102835; HNRNPA1	NM_031157.2
ILMN_1663453	HIST1H2AI	18.655	2	2.59026	0.0346385	0	13.8072	2	4.48759	0.0512048	-0.000291313	0.740134	ILMN_26131	HIST1H2AI	6	Homo sapiens histone cluster 1, H2ai (HIST1H2AI), mRNA.	H2A/c; H2AFC	NM_003509.2
ILMN_1663454	PKP1	6.93963	2	4.67138	0.123494	0	-0.478361	2	0.112842	0.347892	-0.000291313	-0.0689318	ILMN_16551	PKP1	1	Homo sapiens plakophilin 1 (ectodermal dysplasia/skin fragility syndrome) (PKP1), transcript variant 1a, mRNA.	B6P; MGC138829	NM_001005337.1
ILMN_1663486	TLK2	427.074	2	35.1319	0	0	569.739	2	3.48014	0	18.6216	1.33405	ILMN_2656	TLK2	17	Homo sapiens tousled-like kinase 2 (TLK2), mRNA.	MGC44450; PKU-ALPHA	NM_006852.2
ILMN_1663489	UBR2	582.261	2	52.3525	0	0	819.098	2	53.3084	0	28.3246	1.40675	ILMN_29511	UBR2	6	Homo sapiens ubiquitin protein ligase E3 component n-recognin 2 (UBR2), mRNA.	bA49A4.1; RP3-392M17.3; MGC71112; KIAA0349; DKFZp686C08114; dJ242G1.1; C6orf133; dJ392M17.3	NM_015255.1
ILMN_1663497	MXI1	-1.54836	2	7.26782	0.423193	0	-5.0563	2	1.7347	0.704819	-0.000291313	3.26559	ILMN_1042	MXI1	10	Homo sapiens MAX interactor 1 (MXI1), transcript variant 3, mRNA.	MAD2; MXI; MGC43220; MXD2	NM_001008541.1
ILMN_1663502	WHSC1	16.0342	2	7.25902	0.0466867	0	18.169	2	0.229075	0.0361446	0.000291313	1.13314	ILMN_22063	WHSC1	4	Homo sapiens Wolf-Hirschhorn syndrome candidate 1 (WHSC1), transcript variant 7, mRNA.	TRX5; REIIBP; NSD2; WHS; MGC176638; FLJ23286; KIAA1090; MMSET	NM_133334.2
ILMN_1663512	COX5B	10561	2	1652.69	0	0	10719	2	667.569	0	0.000291313	1.01496	ILMN_1924	COX5B	2	Homo sapiens cytochrome c oxidase subunit Vb (COX5B), mRNA.	COXVB	NM_001862.2
ILMN_1663519	SLC24A3	9.3131	2	1.53419	0.0903614	0	6.30543	2	9.19263	0.13253	-0.000291313	0.677049	ILMN_4006	SLC24A3	20	Homo sapiens solute carrier family 24 (sodium/potassium/calcium exchanger), member 3 (SLC24A3), mRNA.	NCKX3	NM_020689.3
ILMN_1663532	RIC8B	112.215	2	5.80266	0.00301205	0	96.8974	2	6.59804	0.00301205	-0.000291313	0.863497	ILMN_3462	RIC8B	12	Homo sapiens resistance to inhibitors of cholinesterase 8 homolog B (C. elegans) (RIC8B), mRNA.	hSyn; FLJ10620; MGC39476; RIC8	NM_018157.2
ILMN_1663538	CLYBL	79.7448	2	2.73762	0.00451807	0	57.1498	2	10.3701	0.00903614	-1.6076	0.716658	ILMN_27821	CLYBL	13	Homo sapiens citrate lyase beta like (CLYBL), mRNA.	bA134O15.1; CLB	NM_206808.1
ILMN_1663541	B4GALT7	535.807	2	2.2219	0	0	626.429	2	17.7324	0	3.92999	1.16913	ILMN_25071	B4GALT7	5	Homo sapiens xylosylprotein beta 1,4-galactosyltransferase, polypeptide 7 (galactosyltransferase I) (B4GALT7), mRNA.	B4GAL-T7; XGALT1; XGPT1; XGALT-1; beta4Gal-T7	NM_007255.1
ILMN_1663561	TCF2	2.14965	2	5.47376	0.24247	0	-2.49701	2	2.27077	0.474398	-0.000291313	-1.16159	ILMN_10099	TCF2	17	Homo sapiens transcription factor 2, hepatic; LF-B3; variant hepatic nuclear factor (TCF2), transcript variant a, mRNA.	VHNF1; MODY5; HNF2; HNF1B; FJHN; HNF1beta; LFB3	NM_000458.1
ILMN_1663569	FTCD	-1.00719	2	0.951334	0.402108	0	2.87975	2	1.32694	0.203313	0.000291313	-2.85918	ILMN_8918	FTCD	21	Homo sapiens formiminotransferase cyclodeaminase (FTCD), transcript variant A, mRNA.	LCHC1	NM_206965.1
ILMN_1663580	DPP6	10.1903	2	4.81555	0.0737952	0	-1.18979	2	1.13965	0.385542	-0.000291313	-0.116756	ILMN_137561	DPP6	7	Homo sapiens dipeptidyl-peptidase 6 (DPP6), transcript variant 1, mRNA.	MGC46605; DPPX	NM_130797.2
ILMN_1663592	BBS5	3.49021	2	0.404582	0.201807	0	6.68289	2	4.6473	0.123494	0.000291313	1.91475	ILMN_139067	BBS5		PREDICTED: Homo sapiens Bardet-Biedl syndrome 5, transcript variant 2 (BBS5), mRNA.		XM_001131846.1
ILMN_1663605	RNF123	314.195	2	11.185	0	0	348.535	2	0.911485	0	0.191491	1.1093	ILMN_29794	RNF123	3	Homo sapiens ring finger protein 123 (RNF123), mRNA.	KPC1; DKFZp686C2222; FP1477; FLJ12565; MGC163504	NM_022064.2
ILMN_1663616	DNAJC7	693.191	2	111.754	0	0	600.334	2	90.9134	0	-0.000291313	0.866044	ILMN_19727	DNAJC7	17	Homo sapiens DnaJ (Hsp40) homolog, subfamily C, member 7 (DNAJC7), mRNA.	TTC2; TPR2; DANJC7	NM_003315.1
ILMN_1663627	ELMO1	11.2459	2	3.83598	0.0677711	0	15.0307	2	2.90359	0.0496988	0.000291313	1.33655	ILMN_137709	ELMO1	7	Homo sapiens engulfment and cell motility 1 (ELMO1), transcript variant 1, mRNA.	MGC126406; CED12; CED-12; KIAA0281; ELMO-1	NM_014800.9
ILMN_1663640	MAOA	1428.12	2	169.999	0	0	1102.76	2	63.0035	0	-9.97961	0.772173	ILMN_11566	MAOA	X	Homo sapiens monoamine oxidase A (MAOA), nuclear gene encoding mitochondrial protein, mRNA.		NM_000240.2
ILMN_1663646	DMXL1	67.7341	2	17.2771	0.00451807	0	112.308	2	24.575	0.00301205	4.12202	1.65807	ILMN_2505	DMXL1	5	Homo sapiens Dmx-like 1 (DMXL1), mRNA.	DKFZp779O1239; FLJ44772	NM_005509.4
ILMN_1663648	MTUS1	-4.73019	2	5.21946	0.674699	0	-1.78256	2	3.74187	0.423193	0.000291313	0.376848	ILMN_4658	MTUS1	8	Homo sapiens mitochondrial tumor suppressor 1 (MTUS1), nuclear gene encoding mitochondrial protein, transcript variant 5, mRNA.	MTSG1; MP44; DKFZp586D1519; ATIP; FLJ14295; KIAA1288; DKFZp686F20243	NM_020749.3
ILMN_1663664	MRPS10	1987.29	2	50.7143	0	0	2656.82	2	127.771	0	23.1264	1.3369	ILMN_2845	MRPS10	6	Homo sapiens mitochondrial ribosomal protein S10 (MRPS10), nuclear gene encoding mitochondrial protein, mRNA.	FLJ10567; PNAS-122; MRP-S10	NM_018141.2
ILMN_1663665	FLJ46082	-4.97539	2	0.701112	0.704819	0	-5.0436	2	0.885682	0.704819	-0.000291313	1.01371	ILMN_25383	FLJ46082	9	Homo sapiens FLJ46082 protein (FLJ46082), mRNA.	MGC148067	NM_207417.1
ILMN_1663667	FLAD1	1111.03	2	44.0118	0	0	956.704	2	9.30908	0	-3.10407	0.861097	ILMN_17093	FLAD1	1	Homo sapiens FAD1 flavin adenine dinucleotide synthetase homolog (S. cerevisiae) (FLAD1), transcript variant 2, mRNA.	FAD1; RP11-307C12.7; MGC40255; FADS; PP591; MGC31803	NM_201398.1
ILMN_1663683	HEPH	-9.00923	2	0.355077	0.953313	0	-6.94009	2	0.411755	0.834337	0.000291313	0.770331	ILMN_19080	HEPH	X	Homo sapiens hephaestin (HEPH), transcript variant 2, mRNA.	KIAA0698; CPL	NM_014799.2
ILMN_1663699	SLCO3A1	17.8762	2	0.0684133	0.0391566	0	10.9919	2	2.15285	0.0798193	-0.000291313	0.61489	ILMN_27392	SLCO3A1	15	Homo sapiens solute carrier organic anion transporter family, member 3A1 (SLCO3A1), mRNA.	FLJ40478; SLC21A11; OATP-D; OATP3A1	NM_013272.2
ILMN_1663716	PCDH21	14.1979	2	7.10485	0.0527108	0	7.72328	2	6.50064	0.112952	-0.000291313	0.543973	ILMN_8172	PCDH21	10	Homo sapiens protocadherin 21 (PCDH21), mRNA.	DKFZp434A132; KIAA1775	NM_033100.1
ILMN_1663718	LHFPL3	24.3599	2	6.7138	0.0256024	0	18.9208	2	6.57552	0.0331325	-0.000291313	0.776722	ILMN_18170	LHFPL3	7	Homo sapiens lipoma HMGIC fusion partner-like 3 (LHFPL3), mRNA.	LHFPL4	NM_199000.2
ILMN_1663722	DNAJB5	15.7874	2	9.29811	0.0466867	0	13.5501	2	3.6096	0.0527108	-0.000291313	0.858282	ILMN_3154	DNAJB5	9	Homo sapiens DnaJ (Hsp40) homolog, subfamily B, member 5 (DNAJB5), mRNA.	KIAA1045; Hsc40	NM_012266.3
ILMN_1663723	SLC13A4	-1.44355	2	0.694716	0.423193	0	-2.79601	2	3.21787	0.49247	-0.000291313	1.9369	ILMN_17218	SLC13A4	7	Homo sapiens solute carrier family 13 (sodium/sulfate symporters), member 4 (SLC13A4), mRNA.	SUT1; SUT-1	NM_012450.2
ILMN_1663749	BTNL3	2.7483	2	1.05573	0.218373	0	1.00848	2	1.87702	0.271084	-0.000291313	0.366947	ILMN_9927	BTNL3	5	Homo sapiens butyrophilin-like 3 (BTNL3), transcript variant 2, mRNA.	BTNLR	NM_006707.2
ILMN_1663754	ZNF442	64.0258	2	1.00143	0.00753012	0	53.1056	2	0.622669	0.0120482	-0.000291313	0.829442	ILMN_17395	ZNF442	19	Homo sapiens zinc finger protein 442 (ZNF442), mRNA.	FLJ14356	NM_030824.2
ILMN_1663772	SIX2	6.84828	2	0.334648	0.123494	0	-0.74991	2	1.2153	0.356928	-0.000291313	-0.109503	ILMN_8167	SIX2	2	Homo sapiens SIX homeobox 2 (SIX2), mRNA.		NM_016932.3
ILMN_1663780	WISP3	16.0238	2	2.98768	0.0466867	0	13.5725	2	4.66865	0.0527108	-0.000291313	0.847019	ILMN_20569	WISP3	6	Homo sapiens WNT1 inducible signaling pathway protein 3 (WISP3), transcript variant 2, mRNA.	LIBC; PPAC; PPD; CCN6; MGC125987; MGC125989; MGC125988	NM_130396.1
ILMN_1663786	EPB41	-0.0236673	2	1.90489	0.335843	0	-6.90729	2	1.50265	0.832831	-0.000291313	291.85	ILMN_15538	EPB41	1	Homo sapiens erythrocyte membrane protein band 4.1 (elliptocytosis 1, RH-linked) (EPB41), transcript variant 2, mRNA.	HE; EL1; 4.1R	NM_203342.1
ILMN_1663787	KLK3	92.6491	2	18.713	0.00451807	0	94.0151	2	1.31866	0.00451807	0.000291313	1.01474	ILMN_19163	KLK3	19	Homo sapiens kallikrein-related peptidase 3 (KLK3), transcript variant 6, mRNA.	hK3; APS; PSA; KLK2A1	NM_001030050.1
ILMN_1663793	MIST	-0.623182	2	0.145282	0.373494	0	2.13775	2	3.0184	0.222892	0.000291313	-3.43038	ILMN_14840	MIST	4	Homo sapiens mast cell immunoreceptor signal transducer (MIST), mRNA.	MGC35197; CLNK	NM_052964.1
ILMN_1663815	UNQ1940	6.95155	2	2.02462	0.123494	0	10.1195	2	8.2541	0.0813253	0.000291313	1.45572	ILMN_3146	UNQ1940	7	Homo sapiens HWKM1940 (UNQ1940), mRNA.		NM_205855.1
ILMN_1663816	CCDC148	-4.97626	2	3.12198	0.701807	0	-6.53074	2	0.176362	0.807229	-0.000291313	1.31238	ILMN_1366	CCDC148	2	Homo sapiens coiled-coil domain containing 148 (CCDC148), mRNA.	MGC125590; MGC125588	NM_138803.2
ILMN_1663827	SMYD5	52.6208	2	6.09548	0.0105422	0	46.6285	2	0.6643	0.0150602	-0.000291313	0.886123	ILMN_26626	SMYD5	2	Homo sapiens SMYD family member 5 (SMYD5), mRNA.	RRG1; RAI15; ZMYND23; NN8-4AG	NM_006062.2
ILMN_1663858	ZNF286A	182.428	2	31.9819	0	0	216.243	2	4.5991	0	0.789035	1.18536	ILMN_16483	ZNF286A	17	Homo sapiens zinc finger protein 286A (ZNF286A), mRNA.	KIAA1874; MGC149627; MGC156181; ZNF286	NM_020652.1
ILMN_1663866	TGFBI	224.965	2	32.6142	0	0	120.804	2	2.48283	0.00301205	-26.3717	0.536989	ILMN_24587	TGFBI	5	Homo sapiens transforming growth factor, beta-induced, 68kDa (TGFBI), mRNA.	CSD1; CSD2; CDB1; CDGG1; EBMD; CSD3; BIGH3; LCD1; CDG2; CSD	NM_000358.1
ILMN_1663873	MMP13	-7.0139	2	2.55041	0.855422	0	-4.95091	2	0.652466	0.694277	0.000291313	0.705871	ILMN_18653	MMP13	11	Homo sapiens matrix metallopeptidase 13 (collagenase 3) (MMP13), mRNA.	CLG3	NM_002427.2
ILMN_1663897	ALS2CR16	-0.832878	2	3.6238	0.384036	0	5.3724	2	3.29585	0.14759	0.000291313	-6.45041	ILMN_20186	ALS2CR16	2	PREDICTED: Homo sapiens amyotrophic lateral sclerosis 2 (juvenile) chromosome region, candidate 16 (ALS2CR16), mRNA.		XM_001134431.1
ILMN_1663916	ARHGAP9	1.23784	2	2.64325	0.268072	0	2.58612	2	1.9222	0.209337	0.000291313	2.08922	ILMN_22879	ARHGAP9	12	Homo sapiens Rho GTPase activating protein 9 (ARHGAP9), transcript variant 2, mRNA.	10C; RGL1; FLJ16525; MGC1295	NM_001080157.1
ILMN_1663919	TFF2	7.45279	2	5.41277	0.114458	0	45.8083	2	4.27407	0.0150602	12.7112	6.14646	ILMN_4028	TFF2	21	Homo sapiens trefoil factor 2 (spasmolytic protein 1) (TFF2), mRNA.	SP; SML1	NM_005423.3
ILMN_1663954	TH1L	2284.93	2	76.557	0	0	1924.22	2	108.113	0	-4.84712	0.842136	ILMN_17156	TH1L	20	Homo sapiens TH1-like (Drosophila) (TH1L), transcript variant 1, mRNA.	HSPC130; NELF-C; NELF-D; TH1	NM_198976.1
ILMN_1663962	LOC441233	1.68503	2	5.84117	0.248494	0	-3.87429	2	7.61662	0.611446	-0.000291313	-2.29924	ILMN_18383	LOC441233	7	PREDICTED: Homo sapiens hypothetical gene supported by AK128010 (LOC441233), misc RNA.		XR_017856.1
ILMN_1663963	DAG1	-2.69931	2	0.0695787	0.516566	0	0.865924	2	1.05409	0.277108	0.000291313	-0.320795	ILMN_31798	DAG1	3	Homo sapiens dystroglycan 1 (dystrophin-associated glycoprotein 1) (DAG1), mRNA.	AGRNR; 156DAG; A3a; DAG	NM_004393.2
ILMN_1663975	CNNM2	35.5545	2	3.29909	0.0165663	0	42.3989	2	1.66237	0.0165663	0.000291313	1.19251	ILMN_10168	CNNM2	10	Homo sapiens cyclin M2 (CNNM2), transcript variant 3, mRNA.	ACDP2	NM_199077.1
ILMN_1663976	PDLIM4	-4.98452	2	2.12561	0.709337	0	-5.05265	2	3.4516	0.704819	-0.000291313	1.01367	ILMN_29303	PDLIM4	5	Homo sapiens PDZ and LIM domain 4 (PDLIM4), mRNA.	RIL	NM_003687.2
ILMN_1663986	MAGI3	2.65767	2	4.2227	0.224398	0	5.31692	2	4.78571	0.149096	0.000291313	2.0006	ILMN_10726	MAGI3	1	Homo sapiens membrane associated guanylate kinase, WW and PDZ domain containing 3 (MAGI3), transcript variant 1, mRNA.	MGC163281; MAGI-3; dJ730K3.2; RP4-730K3.1	NM_020965.2
ILMN_1663997	WNT8A	-1.73227	2	3.13066	0.433735	0	-3.08296	2	4.11379	0.519578	-0.000291313	1.77972	ILMN_137560	WNT8A	5	Homo sapiens wingless-type MMTV integration site family, member 8A (WNT8A), mRNA.	WNT8D	NM_058244.2
ILMN_1664001	ARSF	-1.0582	2	0.667944	0.403614	0	-6.50008	2	0.645649	0.807229	-0.000291313	6.14256	ILMN_19783	ARSF	X	Homo sapiens arylsulfatase F (ARSF), mRNA.	ASF	NM_004042.3
ILMN_1664006	AGL	440.916	2	9.23451	0	0	484.539	2	68.1624	0	0.000291313	1.09894	ILMN_1173	AGL	1	Homo sapiens amylo-1, 6-glucosidase, 4-alpha-glucanotransferase (AGL), transcript variant 1, mRNA.	GDE	NM_000642.2
ILMN_1664010	ELF1	1366.46	2	38.3132	0	0	2101.01	2	25.773	0	56.0627	1.53756	ILMN_24709	ELF1	13	Homo sapiens E74-like factor 1 (ets domain transcription factor) (ELF1), mRNA.		NM_172373.2
ILMN_1664012	CANT1	1151.12	2	90.9465	0	0	1321.68	2	37.0983	0	3.11456	1.14816	ILMN_21488	CANT1	17	Homo sapiens calcium activated nucleotidase 1 (CANT1), mRNA.	SHAPY; SCAN-1	NM_138793.2
ILMN_1664016	ARHGEF18	1656.15	2	96.8583	0	0	1700.6	2	119.654	0	0.000291313	1.02684	ILMN_4153	ARHGEF18	19	Homo sapiens rho/rac guanine nucleotide exchange factor (GEF) 18 (ARHGEF18), mRNA.	KIAA0521; MGC15913	NM_015318.2
ILMN_1664024	APOB	19.7734	2	2.67249	0.0331325	0	11.3569	2	5.85367	0.0722891	-0.000291313	0.574352	ILMN_9286	APOB	2	Homo sapiens apolipoprotein B (including Ag(x) antigen) (APOB), mRNA.	FLDB	NM_000384.2
ILMN_1664025	PXMP4	98.0784	2	19.4633	0.00301205	0	95.5827	2	7.64703	0.00451807	-0.000291313	0.974554	ILMN_4808	PXMP4	20	Homo sapiens peroxisomal membrane protein 4, 24kDa (PXMP4), transcript variant 1, mRNA.	PMP24	NM_007238.4
ILMN_1664028	CENPB	3827.28	2	9.27497	0	0	2622.76	2	141.233	0	-28.1274	0.68528	ILMN_13163	CENPB	20	Homo sapiens centromere protein B, 80kDa (CENPB), mRNA.		NM_001810.5
ILMN_1664030	RAB1B	227.635	2	7.15036	0	0	256.669	2	28.7305	0	0.000291313	1.12754	ILMN_7922	RAB1B	11	Homo sapiens RAB1B, member RAS oncogene family (RAB1B), mRNA.		NM_030981.2
ILMN_1664047	CACNA1E	-5.39928	2	0.241395	0.743976	0	-7.11398	2	4.06398	0.84488	-0.000291313	1.31758	ILMN_9310	CACNA1E	1	Homo sapiens calcium channel, voltage-dependent, R type, alpha 1E subunit (CACNA1E), mRNA.	CACH6; BII; CACNL1A6; Cav2.3	NM_000721.2
ILMN_1664051	SEC22C	315.975	2	12.2056	0	0	383.478	2	29.3599	0	5.05952	1.21363	ILMN_15895	SEC22C	3	Homo sapiens SEC22 vesicle trafficking protein homolog C (S. cerevisiae) (SEC22C), transcript variant 1, mRNA.	MGC13261; MGC5373; DKFZp761F2321; SEC22L3	NM_032970.2
ILMN_1664063	FAM129C	-5.28597	2	1.01935	0.740964	0	-4.6663	2	3.02638	0.670181	0.000291313	0.882771	ILMN_26827	FAM129C	19	Homo sapiens family with sequence similarity 129, member C (FAM129C), mRNA.	FLJ39802; BCNP1	NM_173544.2
ILMN_1664068	ERGIC1	422.036	2	17.9074	0	0	547.812	2	61.0084	0	7.64726	1.29802	ILMN_7272	ERGIC1	5	Homo sapiens endoplasmic reticulum-golgi intermediate compartment (ERGIC) 1 (ERGIC1), transcript variant 1, mRNA.	ERGIC32; MGC14345; KIAA1181; ERGIC-32	NM_001031711.1
ILMN_1664071	TNNT2	0.899984	2	2.92252	0.281627	0	16.0571	2	1.84624	0.0436747	0.558536	17.8415	ILMN_22685	TNNT2	1	Homo sapiens troponin T type 2 (cardiac) (TNNT2), transcript variant 1, mRNA.	cTnT; CMPD2; CMH2; TnTC; MGC3889	NM_000364.2
ILMN_1664089	LOC286076	15.0654	2	4.75842	0.0496988	0	15.5563	2	0.657824	0.0481928	0.000291313	1.03259	ILMN_19971	LOC286076	8	Homo sapiens hypothetical protein LOC286076 (LOC286076), mRNA.		NM_001024610.1
ILMN_1664094	P2RY13	-2.93504	2	6.18268	0.542169	0	-1.67317	2	8.41303	0.418675	0.000291313	0.570065	ILMN_9350	P2RY13	3	Homo sapiens purinergic receptor P2Y, G-protein coupled, 13 (P2RY13), transcript variant 1, mRNA.	P2Y13; FKSG77; SP174; GPR86; GPR94; GPCR1	NM_023914.2
ILMN_1664098	FASTK	298.99	2	50.1555	0	0	263.239	2	17.121	0	-0.000291313	0.880427	ILMN_11299	FASTK	7	Homo sapiens Fas-activated serine/threonine kinase (FASTK), transcript variant 4, mRNA.	FAST	NM_033015.2
ILMN_1664099	GLIS3	-6.27569	2	0.0849951	0.804217	0	-5.03266	2	3.09168	0.704819	0.000291313	0.801928	ILMN_39900	GLIS3	9	Homo sapiens GLIS family zinc finger 3 (GLIS3), transcript variant 2, mRNA.	ZNF515; FLJ38999; MGC33662; FLJ90578	NM_152629.3
ILMN_1664111	RFFL	-0.332827	2	5.83232	0.361446	0	2.83345	2	0.333415	0.203313	0.000291313	-8.51327	ILMN_18313	RFFL	17	Homo sapiens ring finger and FYVE-like domain containing 1 (RFFL), transcript variant 2, mRNA.	RNF189; RNF34L	NM_001017368.1
ILMN_1664122	PTPN6	70.7401	2	35.4985	0.00451807	0	135.38	2	5.38837	0.00150602	7.35974	1.91377	ILMN_25213	PTPN6	12	Homo sapiens protein tyrosine phosphatase, non-receptor type 6 (PTPN6), transcript variant 2, mRNA.	SHP-1L; HCP; SH-PTP1; PTP-1C; HCPH; SHP1; SHP-1; HPTP1C	NM_080548.3
ILMN_1664139	FAM29A	68.6066	2	6.94168	0.00451807	0	39.9837	2	11.5538	0.0165663	-3.66938	0.582797	ILMN_3594	FAM29A	9	Homo sapiens family with sequence similarity 29, member A (FAM29A), mRNA.	MGC102696; MGC138798; RP11-296P7.3; MGC138799	NM_017645.3
ILMN_1664165	IZUMO1	-7.86372	2	1.69623	0.914157	0	-3.86618	2	1.14213	0.608434	0.000291313	0.491648	ILMN_5623	IZUMO1	19	Homo sapiens izumo sperm-egg fusion 1 (IZUMO1), mRNA.	MGC34799; IZUMO	NM_182575.1
ILMN_1664167	BXDC1	2362.8	2	189.564	0	0	1783.57	2	132.76	0	-13.8589	0.754854	ILMN_29712	BXDC1	6	Homo sapiens brix domain containing 1 (BXDC1), mRNA.	FLJ21087; RPF2; bA397G5.4	NM_032194.1
ILMN_1664168	SLC25A11	458.199	2	81.7514	0	0	382.651	2	25.8491	0	-0.856177	0.83512	ILMN_27046	SLC25A11	17	Homo sapiens solute carrier family 25 (mitochondrial carrier; oxoglutarate carrier), member 11 (SLC25A11), nuclear gene encoding mitochondrial protein, mRNA.	SLC20A4; OGC	NM_003562.3
ILMN_1664170	CUGBP2	16.0755	2	9.79398	0.0466867	0	15.1941	2	9.03224	0.0496988	-0.000291313	0.94517	ILMN_21178	CUGBP2	10	Homo sapiens CUG triplet repeat, RNA binding protein 2 (CUGBP2), transcript variant 1, mRNA.	BRUNOL3; ETR-3; NAPOR	NM_001025076.2
ILMN_1664177	ATXN7L2	108.637	2	7.00918	0.00301205	0	68.3286	2	6.09656	0.0060241	-9.18188	0.628964	ILMN_6796	ATXN7L2	1	Homo sapiens ataxin 7-like 2 (ATXN7L2), mRNA.	FLJ00381; MGC46534	NM_153340.3
ILMN_1664186	MFN1	342.914	2	55.807	0	0	363.231	2	21.5972	0	0.000291313	1.05925	ILMN_17727	MFN1	3	Homo sapiens mitofusin 1 (MFN1), nuclear gene encoding mitochondrial protein, mRNA.	MGC41806; DKFZp762F247; hfzo1; FLJ20693; hfzo2	NM_033540.2
ILMN_1664216	NKIRAS1	707.523	2	44.5815	0	0	801.154	2	64.2746	0	1.27045	1.13234	ILMN_28229	NKIRAS1	3	Homo sapiens NFKB inhibitor interacting Ras-like 1 (NKIRAS1), mRNA.	KBRAS1; kappaB-Ras1	NM_020345.3
ILMN_1664231	TIMM23	1993.85	2	261.848	0	0	1813.81	2	84.832	0	-0.000291313	0.909704	ILMN_137315	TIMM23	10	Homo sapiens translocase of inner mitochondrial membrane 23 homolog (yeast) (TIMM23), nuclear gene encoding mitochondrial protein, mRNA.	PRO1197; MGC22767; TIM23; TIMM23B	NM_006327.2
ILMN_1664235	BCL2L14	1.81474	2	1.49902	0.246988	0	2.09714	2	5.46898	0.224398	0.000291313	1.15561	ILMN_14286	BCL2L14	12	Homo sapiens BCL2-like 14 (apoptosis facilitator) (BCL2L14), transcript variant 2, mRNA.	BCLG	NM_030766.1
ILMN_1664236	ADAM28	3.5827	2	0.302014	0.197289	0	-1.28623	2	0.583736	0.388554	-0.000291313	-0.359012	ILMN_4121	ADAM28	8	Homo sapiens ADAM metallopeptidase domain 28 (ADAM28), transcript variant 3, mRNA.	MDC-Ls; MDC-Lm; MDCL; eMDCII; ADAM23	NM_021777.3
ILMN_1664242	C20orf12	11.6749	2	1.53875	0.0662651	0	23.5359	2	9.0833	0.0286145	0.000291313	2.01593	ILMN_709	C20ORF12	20	Homo sapiens chromosome 20 open reading frame 12 (C20orf12), mRNA.	bA189K21.8; DKFZp781J2425; dJ568F9.2; FLJ30892; bA189K21.1; C20orf84; FLJ10600	NM_001099407.1
ILMN_1664243	USE1	97.2461	2	2.53764	0.00301205	0	103.863	2	12.2218	0.00301205	0.000291313	1.06804	ILMN_10716	USE1	19	Homo sapiens unconventional SNARE in the ER 1 homolog (S. cerevisiae) (USE1), mRNA.	SLT1; MDS032; P31	NM_018467.3
ILMN_1664248	MGC40069	2.27414	2	3.4344	0.237952	0	-1.61484	2	1.66939	0.408133	-0.000291313	-0.710089	ILMN_30193	MGC40069		Homo sapiens hypothetical protein MGC40069 (MGC40069), mRNA.		NM_182615.1
ILMN_1664265	EPHA1	892.678	2	111.601	0	0	883.492	2	23.5792	0	-0.000291313	0.98971	ILMN_26326	EPHA1	7	Homo sapiens EPH receptor A1 (EPHA1), mRNA.	EPHT; MGC163163; EPHT1; EPH	NM_005232.3
ILMN_1664267	WBSCR28	25.136	2	8.88068	0.0240964	0	11.4522	2	6.72195	0.0722891	-0.000291313	0.455608	ILMN_17316	WBSCR28	7	Homo sapiens Williams-Beuren syndrome chromosome region 28 (WBSCR28), mRNA.	MGC26719	NM_182504.3
ILMN_1664283	C9orf75	175.487	2	12.6104	0	0	174.733	2	4.23897	0	-0.000291313	0.995703	ILMN_8290	C9ORF75	9	Homo sapiens chromosome 9 open reading frame 75 (C9orf75), mRNA.	MGC131933; RP11-350O14.7; FLJ90254	NM_173691.2
ILMN_1664289	LOC440570	-4.23886	2	2.85779	0.629518	0	-3.05712	2	2.11842	0.519578	0.000291313	0.721213	ILMN_19954	LOC440570	1	Homo sapiens LOC440570 (LOC440570), mRNA.		NM_001013708.1
ILMN_1664292	ZNF415	223.282	2	2.05713	0	0	202.694	2	18.7912	0	-0.000291313	0.907792	ILMN_16495	ZNF415	19	Homo sapiens zinc finger protein 415 (ZNF415), mRNA.	FLJ11191	NM_018355.2
ILMN_1664294	LEPRE1	153.564	2	17.2019	0	0	207.235	2	4.86497	0	10.5538	1.34951	ILMN_7267	LEPRE1	1	Homo sapiens leucine proline-enriched proteoglycan (leprecan) 1 (LEPRE1), mRNA.	MGC117314; GROS1; P3H1	NM_022356.2
ILMN_1664303	HTATIP2	3146.16	2	394.166	0	0	4574.74	2	5.64755	0	33.1428	1.45407	ILMN_16008	HTATIP2	11	Homo sapiens HIV-1 Tat interactive protein 2, 30kDa (HTATIP2), mRNA.	CC3; TIP30	NM_006410.3
ILMN_1664316	CCR9	35.133	2	14.9683	0.0165663	0	28.3094	2	9.07174	0.0271084	-0.000291313	0.805778	ILMN_16242	CCR9	3	Homo sapiens chemokine (C-C motif) receptor 9 (CCR9), transcript variant A, mRNA.	GPR-9-6; CDw199; GPR28	NM_031200.1
ILMN_1664320	SLC14A2	3.49024	2	1.78415	0.200301	0	2.60163	2	5.94499	0.209337	-0.000291313	0.745403	ILMN_19280	SLC14A2	18	Homo sapiens solute carrier family 14 (urea transporter), member 2 (SLC14A2), mRNA.	HUT2; hUT-A6; FLJ16167; UTR; MGC119566; UT-A2; MGC119567; UT2	NM_007163.2
ILMN_1664330	CEACAM1	24.9328	2	4.52203	0.0240964	0	47.195	2	0.19185	0.0150602	3.0203	1.89289	ILMN_21651	CEACAM1	19	Homo sapiens carcinoembryonic antigen-related cell adhesion molecule 1 (biliary glycoprotein) (CEACAM1), transcript variant 1, mRNA.	BGPI; BGP; BGP1	NM_001712.3
ILMN_1664348	PNPLA4	-6.03272	2	0.361073	0.783133	0	-1.60736	2	1.00991	0.408133	0.000291313	0.266441	ILMN_19765	PNPLA4	X	Homo sapiens patatin-like phospholipase domain containing 4 (PNPLA4), mRNA.	GS2; DXS1283E	NM_004650.1
ILMN_1664362	SGIP1	-3.59008	2	0.733594	0.576807	0	-5.64462	2	1.97148	0.745482	-0.000291313	1.57228	ILMN_23216	SGIP1	1	Homo sapiens SH3-domain GRB2-like (endophilin) interacting protein 1 (SGIP1), mRNA.	FLJ43054; DKFZp761D221; FLJ33378; DKFZp686A16142	NM_032291.2
ILMN_1664364	FLJ40288	6.01109	2	1.88594	0.135542	0	9.8542	2	1.4722	0.0858434	0.000291313	1.63934	ILMN_3506	FLJ40288	7	Homo sapiens hypothetical protein FLJ40288 (FLJ40288), mRNA.		NM_173682.1
ILMN_1664367	COQ6	105.183	2	4.16067	0.00301205	0	118.004	2	6.82764	0.00301205	0.000291313	1.1219	ILMN_25200	COQ6	14	Homo sapiens coenzyme Q6 homolog, monooxygenase (S. cerevisiae) (COQ6), transcript variant 1, mRNA.	CGI-10	NM_182476.1
ILMN_1664369	DHTKD1	116.047	2	4.91448	0.00301205	0	113.858	2	4.28707	0.00301205	-0.000291313	0.981142	ILMN_23823	DHTKD1	10	Homo sapiens dehydrogenase E1 and transketolase domain containing 1 (DHTKD1), mRNA.	MGC3090; DKFZP762M115; KIAA1630	NM_018706.5
ILMN_1664416	MEIS2	2.15099	2	2.12296	0.237952	0	3.30053	2	2.62337	0.186747	0.000291313	1.53442	ILMN_20262	MEIS2	15	Homo sapiens Meis homeobox 2 (MEIS2), transcript variant f, mRNA.	MGC2820; MRG1; HsT18361	NM_002399.2
ILMN_1664434	TCF3	451.334	2	26.9736	0	0	372.562	2	24.6151	0	-4.90961	0.825468	ILMN_5571	TCF3	19	Homo sapiens transcription factor 3 (E2A immunoglobulin enhancer binding factors E12/E47) (TCF3), mRNA.	MGC129648; MGC129647; ITF1; E2A	NM_003200.1
ILMN_1664439	TAF1	12.3732	2	0.630865	0.061747	0	8.97616	2	3.55379	0.0933735	-0.000291313	0.725453	ILMN_6371	TAF1	X	Homo sapiens TAF1 RNA polymerase II, TATA box binding protein (TBP)-associated factor, 250kDa (TAF1), transcript variant 2, mRNA.	KAT4; CCG1; P250; OF; BA2R; DYT3; TAFII250; NSCL2; CCGS; TAF2A	NM_138923.1
ILMN_1664440	TP53BP1	429.412	2	84.7395	0	0	685.691	2	30.8522	0	25.3754	1.59681	ILMN_20364	TP53BP1	15	Homo sapiens tumor protein p53 binding protein 1 (TP53BP1), mRNA.	53BP1; MGC138366; p202; FLJ41424	NM_005657.1
ILMN_1664449	ALG5	2016.02	2	357.464	0	0	1430.99	2	28.9197	0	-7.57988	0.709808	ILMN_10548	ALG5	13	Homo sapiens asparagine-linked glycosylation 5 homolog (S. cerevisiae, dolichyl-phosphate beta-glucosyltransferase) (ALG5), mRNA.	bA421P11.2; RP11-421P11.2	NM_013338.3
ILMN_1664462	ONECUT2	4.37197	2	0.304133	0.177711	0	-0.837174	2	0.0635602	0.35994	-0.000291313	-0.191487	ILMN_27185	ONECUT2	18	Homo sapiens one cut homeobox 2 (ONECUT2), mRNA.	OC-2; OC2; MGC120378; MGC120377	NM_004852.2
ILMN_1664464	PTGDS	-4.9962	2	2.71453	0.710843	0	-6.59552	2	2.48144	0.808735	-0.000291313	1.32011	ILMN_19248	PTGDS	9	Homo sapiens prostaglandin D2 synthase 21kDa (brain) (PTGDS), mRNA.	PGD2; PGDS; PGDS2; PDS	NM_000954.5
ILMN_1664466	KLHL9	523.199	2	62.1161	0	0	738.908	2	11.7241	0	26.9974	1.41229	ILMN_20376	KLHL9	9	Homo sapiens kelch-like 9 (Drosophila) (KLHL9), mRNA.	RP11-380P16.6; FLJ21815	NM_018847.2
ILMN_1664499	PLEKHG7	4.64465	2	5.71134	0.171687	0	3.20949	2	3.96792	0.188253	-0.000291313	0.691009	ILMN_18484	PLEKHG7	12	Homo sapiens pleckstrin homology domain containing, family G (with RhoGef domain) member 7 (PLEKHG7), mRNA.	FLJ46688	NM_001004330.1
ILMN_1664502	CRMP1	-7.57137	2	3.70657	0.888554	0	-5.27943	2	0.848372	0.715361	0.000291313	0.697288	ILMN_7211	CRMP1	4	Homo sapiens collapsin response mediator protein 1 (CRMP1), transcript variant 1, mRNA.	DRP-1; DPYSL1; DRP1	NM_001014809.1
ILMN_1664511	NDC80	545.828	2	90.0293	0	0	175.12	2	9.45758	0	-61.3855	0.320833	ILMN_14098	NDC80	18	Homo sapiens NDC80 homolog, kinetochore complex component (S. cerevisiae) (NDC80), mRNA.	HEC; hsNDC80; TID3; KNTC2; HEC1	NM_006101.1
ILMN_1664516	CENPF	933.433	2	125.662	0	0	344.76	2	18.3965	0	-81.0866	0.369346	ILMN_8225	CENPF	1	Homo sapiens centromere protein F, 350/400ka (mitosin) (CENPF), mRNA.	PRO1779; hcp-1; CENF	NM_016343.3
ILMN_1664525	P2RY13	2.50395	2	3.34825	0.224398	0	-3.07967	2	2.44373	0.519578	-0.000291313	-1.22992	ILMN_9350	P2RY13	3	Homo sapiens purinergic receptor P2Y, G-protein coupled, 13 (P2RY13), transcript variant 2, mRNA.	P2Y13; FKSG77; SP174; GPR86; GPR94; GPCR1	NM_176894.1
ILMN_1664537	USP11	219.087	2	43.0998	0	0	298.96	2	9.64344	0	7.38636	1.36457	ILMN_3442	USP11	X	Homo sapiens ubiquitin specific peptidase 11 (USP11), mRNA.	UHX1	NM_004651.3
ILMN_1664542	UBE2I	27.8431	2	10.103	0.0210843	0	27.9402	2	0.728064	0.0271084	0.000291313	1.00349	ILMN_27059	UBE2I	16	Homo sapiens ubiquitin-conjugating enzyme E2I (UBC9 homolog, yeast) (UBE2I), transcript variant 2, mRNA.	UBC9; P18; C358B7.1	NM_194259.1
ILMN_1664543	IFIT3	-6.71678	2	5.87345	0.820783	0	-9.09623	2	0.839921	0.939759	-0.000291313	1.35425	ILMN_22925	IFIT3	10	Homo sapiens interferon-induced protein with tetratricopeptide repeats 3 (IFIT3), mRNA.	IRG2; RIG-G; IFI60; ISG60; IFIT4; GARG-49; CIG-49	NM_001031683.1
ILMN_1664560	DYRK1A	796.181	2	96.4324	0	0	751.843	2	15.8272	0	-0.000291313	0.944312	ILMN_18035	DYRK1A	21	Homo sapiens dual-specificity tyrosine-(Y)-phosphorylation regulated kinase 1A (DYRK1A), transcript variant 5, mRNA.	HP86; DYRK; DYRK1; MNBH; MNB	NM_130438.1
ILMN_1664563	FLJ33360	-8.64216	2	2.57662	0.936747	0	-6.70552	2	0.687329	0.819277	0.000291313	0.775907	ILMN_21809	FLJ33360	5	Homo sapiens FLJ33360 protein (FLJ33360), mRNA.		NM_001001702.1
ILMN_1664565	PROZ	-5.13454	2	3.11072	0.712349	0	-9.1957	2	2.7896	0.942771	-0.000291313	1.79095	ILMN_29990	PROZ	13	Homo sapiens protein Z, vitamin K-dependent plasma glycoprotein (PROZ), mRNA.	PZ	NM_003891.1
ILMN_1664577	DLD	1745.84	2	106.692	0	0	2288.64	2	177.8	0	14.9609	1.31091	ILMN_18159	DLD	7	Homo sapiens dihydrolipoamide dehydrogenase (DLD), mRNA.	E3; PHE3; DLDH; GCSL; LAD	NM_000108.3
ILMN_1664581	MICALL2	9.44211	2	3.20021	0.0903614	0	8.41377	2	0.91667	0.108434	-0.000291313	0.89109	ILMN_8459	MICALL2		Homo sapiens MICAL-like 2 (MICALL2), transcript variant 1, mRNA.	JRAB; MICAL-L2; FLJ23471; FLJ44858; MGC46023	NM_182924.2
ILMN_1664592	C1orf95	-0.0163768	2	0.357283	0.328313	0	7.11577	2	6.04208	0.121988	0.000291313	-434.504	ILMN_25155	C1ORF95	1	Homo sapiens chromosome 1 open reading frame 95 (C1orf95), mRNA.	RP11-9C4.1; DKFZp761P211	NM_001003665.2
ILMN_1664607	NRIP2	8.07734	2	3.41212	0.108434	0	12.8789	2	1.06723	0.0572289	0.000291313	1.59445	ILMN_7671	NRIP2	12	Homo sapiens nuclear receptor interacting protein 2 (NRIP2), mRNA.	DKFZP761G1913	NM_031474.1
ILMN_1664608	INPP5A	527.403	2	25.4001	0	0	422.391	2	7.70788	0	-7.56773	0.800889	ILMN_137853	INPP5A		PREDICTED: Homo sapiens inositol polyphosphate-5-phosphatase, 40kDa (INPP5A), mRNA.		XM_001133189.1
ILMN_1664614	FAU	14795.1	2	1529.97	0	0	13009.5	2	918.334	0	-1.7518	0.879307	ILMN_3073	FAU	11	Homo sapiens Finkel-Biskis-Reilly murine sarcoma virus (FBR-MuSV) ubiquitously expressed (FAU), mRNA.	Fub1; MNSFbeta; FAU1; RPS30; FLJ22986; Fubi	NM_001997.3
ILMN_1664630	CHEK1	730.977	2	6.37225	0	0	508.25	2	41.5093	0	-21.091	0.695301	ILMN_25327	CHEK1	11	Homo sapiens CHK1 checkpoint homolog (S. pombe) (CHEK1), mRNA.	CHK1	NM_001274.3
ILMN_1664631	ADAM28	2.18061	2	4.19254	0.24247	0	10.251	2	2.41143	0.0813253	0.000291313	4.70098	ILMN_4121	ADAM28	8	Homo sapiens ADAM metallopeptidase domain 28 (ADAM28), transcript variant 3, mRNA.	MDC-Ls; MDC-Lm; MDCL; eMDCII; ADAM23	NM_021777.3
ILMN_1664641	MED4	1083.78	2	100.281	0	0	969.018	2	42.9746	0	-0.941319	0.894112	ILMN_25907	MED4	13	Homo sapiens mediator complex subunit 4 (MED4), mRNA.	VDRIP; HSPC126; RP11-90M2.2; FLJ10956; TRAP36; DRIP36	NM_014166.2
ILMN_1664644	ATG16L2	29.1062	2	4.42153	0.0195783	0	20.7684	2	2.13135	0.0301205	-0.000291313	0.713538	ILMN_16649	ATG16L2	11	Homo sapiens ATG16 autophagy related 16-like 2 (S. cerevisiae) (ATG16L2), mRNA.	FLJ00012; WDR80	NM_033388.1
ILMN_1664646	NSUN6	125.377	2	21.5802	0.00150602	0	87.6584	2	16.5822	0.00451807	-3.08906	0.699161	ILMN_30073	NSUN6	10	Homo sapiens NOL1/NOP2/Sun domain family, member 6 (NSUN6), mRNA.	4933414E04Rik; NOPD1; FLJ23743	NM_182543.1
ILMN_1664679	CADM2	-8.11283	2	2.10318	0.921687	0	-10.0793	2	0.15059	0.968373	-0.000291313	1.24239	ILMN_27645	CADM2	3	Homo sapiens cell adhesion molecule 2 (CADM2), mRNA.	NECL3; MGC104534; IGSF4D; Necl-3; MGC138341; synCAM2; MGC138343	NM_153184.2
ILMN_1664682	DNA2	238.928	2	19.2031	0	0	103.213	2	20.2829	0.00301205	-46.9224	0.431984	ILMN_33961	DNA2	10	Homo sapiens DNA replication helicase 2 homolog (yeast) (DNA2), mRNA.	DNA2L; MGC133297; KIAA0083; FLJ10063	NM_001080449.1
ILMN_1664698	UNC119	192.493	2	15.2098	0	0	223.867	2	10.378	0	1.54345	1.16299	ILMN_9157	UNC119	17	Homo sapiens unc-119 homolog (C. elegans) (UNC119), transcript variant 2, mRNA.	HRG4	NM_054035.1
ILMN_1664701	FLJ14816	-4.99515	2	2.61394	0.710843	0	-3.89111	2	1.02496	0.608434	0.000291313	0.778978	ILMN_9940	FLJ14816		PREDICTED: Homo sapiens hypothetical protein FLJ14816 (FLJ14816), misc RNA.		XR_017947.1
ILMN_1664706	LOC653604	37.0383	2	7.21093	0.0150602	0	11.7027	2	0.601938	0.0707831	-4.2755	0.315963	ILMN_23073	LOC653604	1	PREDICTED: Homo sapiens similar to H3 histone, family 2 isoform 2 (LOC653604), mRNA.		XM_497711.2
ILMN_1664718	CYP51A1	826.311	2	68.2544	0	0	1954.25	2	228.642	0	81.8116	2.36504	ILMN_1634	CYP51A1	7	Homo sapiens cytochrome P450, family 51, subfamily A, polypeptide 1 (CYP51A1), mRNA.	CP51; CYPL1; P450-14DM; CYP51; P450L1; LDM	NM_000786.2
ILMN_1664741	C10orf72	6.44288	2	1.27506	0.131024	0	9.89188	2	4.13343	0.0858434	0.000291313	1.53532	ILMN_5468	C10ORF72	10	Homo sapiens chromosome 10 open reading frame 72 (C10orf72), transcript variant 2, mRNA.	MGC44086; FLJ31737	NM_144984.1
ILMN_1664748	SLC25A25	6.9115	2	3.14571	0.123494	0	3.52697	2	5.61509	0.176205	-0.000291313	0.510305	ILMN_26709	SLC25A25	9	Homo sapiens solute carrier family 25 (mitochondrial carrier; phosphate carrier), member 25 (SLC25A25), nuclear gene encoding mitochondrial protein, transcript variant 3, mRNA.	MGC105138; KIAA1896; SCAMC-2; RP11-395P17.4; MCSC; MGC119517; MGC119514; MGC119516; MGC119515; PCSCL	NM_001006642.1
ILMN_1664750	TMBIM4	3702.9	2	29.8996	0	0	3909.1	2	87.4887	0	0.000291313	1.05569	ILMN_22938	TMBIM4	12	Homo sapiens transmembrane BAX inhibitor motif containing 4 (TMBIM4), mRNA.	CGI-119; ZPRO; S1R; GAAP	NM_016056.2
ILMN_1664756	KPNA4	2106.07	2	17.7191	0	0	2610.24	2	215.222	0	7.99115	1.23939	ILMN_21107	KPNA4	3	Homo sapiens karyopherin alpha 4 (importin alpha 3) (KPNA4), mRNA.	MGC12217; MGC26703; SRP3; QIP1; IPOA3	NM_002268.3
ILMN_1664761	TMEM138	499.274	2	22.8564	0	0	423.426	2	17.0632	0	-3.41376	0.848084	ILMN_5258	TMEM138	11	Homo sapiens transmembrane protein 138 (TMEM138), mRNA.	HSPC196	NM_016464.3
ILMN_1664771	OR5I1	0.0310045	2	2.64555	0.329819	0	-7.96371	2	2.95424	0.902108	-0.000291313	-256.856	ILMN_24630	OR5I1	11	Homo sapiens olfactory receptor, family 5, subfamily I, member 1 (OR5I1), mRNA.	HSOlf1; OLF1	NM_006637.1
ILMN_1664772	ATP2B4	6.98363	2	1.83026	0.123494	0	21.8702	2	0.970473	0.0301205	0.447362	3.13164	ILMN_4324	ATP2B4	1	Homo sapiens ATPase, Ca++ transporting, plasma membrane 4 (ATP2B4), transcript variant 1, mRNA.	DKFZp686M088; PMCA4b; DKFZp686G08106; PMCA4x; PMCA4; ATP2B2; MXRA1	NM_001001396.1
ILMN_1664773	C11orf49	22.6237	2	3.04643	0.0256024	0	30.9629	2	2.77346	0.0225904	0.000291313	1.36861	ILMN_30118	C11ORF49	11	Homo sapiens chromosome 11 open reading frame 49 (C11orf49), transcript variant 3, mRNA.	FLJ22210; MGC4707	NM_024113.3
ILMN_1664776	EFR3A	1321.66	2	35.8246	0	0	1488.64	2	83.5299	0	1.82666	1.12634	ILMN_4161	EFR3A	8	Homo sapiens EFR3 homolog A (S. cerevisiae) (EFR3A), mRNA.	KIAA0143; DKFZp781J0562	NM_015137.3
ILMN_1664779	FBXO18	10.2568	2	3.67554	0.0753012	0	6.22163	2	1.92742	0.135542	-0.000291313	0.606584	ILMN_5897	FBXO18	10	Homo sapiens F-box protein, helicase, 18 (FBXO18), transcript variant 1, mRNA.	MGC141937; FBH1; FLJ14590; MGC141935; Fbx18; MGC131916	NM_032807.3
ILMN_1664798	GRHPR	424.645	2	1.01214	0	0	484.601	2	12.1435	0	1.99643	1.14119	ILMN_4744	GRHPR	9	Homo sapiens glyoxylate reductase/hydroxypyruvate reductase (GRHPR), mRNA.	PH2; GLXR	NM_012203.1
ILMN_1664802	WSB1	536.847	2	91.3538	0	0	639.067	2	24.676	0	1.92682	1.19041	ILMN_674	WSB1	17	Homo sapiens WD repeat and SOCS box-containing 1 (WSB1), transcript variant 2, mRNA.	SWIP1; WSB-1	NM_134265.2
ILMN_1664815	ELK4	39.7978	2	0.772589	0.0150602	0	28.379	2	1.70495	0.0256024	-0.000291313	0.713079	ILMN_16457	ELK4	1	Homo sapiens ELK4, ETS-domain protein (SRF accessory protein 1) (ELK4), transcript variant b, mRNA.	SAP1	NM_021795.2
ILMN_1664823	TAOK3	-5.39296	2	7.34841	0.736446	0	-1.16115	2	2.9446	0.38253	0.000291313	0.215309	ILMN_24516	TAOK3	12	Homo sapiens TAO kinase 3 (TAOK3), mRNA.	DPK; DKFZp666H245; JIK; FLJ31808; MAP3K18	NM_016281.2
ILMN_1664826	FBXO33	1148.32	2	81.6992	0	0	1326.71	2	123.087	0	1.99099	1.15535	ILMN_3703	FBXO33	14	Homo sapiens F-box protein 33 (FBXO33), mRNA.	c14_5247; Fbx33	NM_203301.1
ILMN_1664828	APOBEC3H	0.389353	2	3.98822	0.313253	0	-3.1534	2	5.38379	0.52259	-0.000291313	-8.09909	ILMN_18618	APOBEC3H	22	Homo sapiens apolipoprotein B mRNA editing enzyme, catalytic polypeptide-like 3H (APOBEC3H), mRNA.	dJ742C19.2; ARP10	NM_181773.2
ILMN_1664833	MRPL50	2310.89	2	183.28	0	0	2239.07	2	149.543	0	-0.000291313	0.968923	ILMN_19680	MRPL50	9	Homo sapiens mitochondrial ribosomal protein L50 (MRPL50), nuclear gene encoding mitochondrial protein, mRNA.	FLJ21990; MRP-L50; FLJ20493	NM_019051.1
ILMN_1664855	PPP1R14C	366.179	2	0.139828	0	0	241.393	2	13.4665	0	-24.7193	0.659222	ILMN_28257	PPP1R14C	6	Homo sapiens protein phosphatase 1, regulatory (inhibitor) subunit 14C (PPP1R14C), mRNA.	KEPI; NY-BR-81; CPI17-like	NM_030949.2
ILMN_1664861	ID1	1104.64	2	74.6228	0	0	2161.6	2	263.37	0	50.6214	1.95683	ILMN_28002	ID1	20	Homo sapiens inhibitor of DNA binding 1, dominant negative helix-loop-helix protein (ID1), transcript variant 2, mRNA.	ID	NM_181353.1
ILMN_1664863	CTRL	20.8072	2	17.1591	0.0301205	0	12.9494	2	0.233584	0.0572289	-0.000291313	0.62235	ILMN_21415	CTRL	16	Homo sapiens chymotrypsin-like (CTRL), mRNA.	CTRL1; MGC70821	NM_001907.1
ILMN_1664872	CACNA1G	-2.54648	2	2.45751	0.509036	0	-1.91077	2	2.29237	0.433735	0.000291313	0.750356	ILMN_26954	CACNA1G	17	Homo sapiens calcium channel, voltage-dependent, T type, alpha 1G subunit (CACNA1G), transcript variant 15, mRNA.	Ca(V)T.1; Cav3.1; NBR13; MGC117234	NM_198397.1
ILMN_1664878	NLRP2	-3.31098	2	5.11502	0.551205	0	-3.93825	2	6.25538	0.620482	-0.000291313	1.18945	ILMN_17259	NLRP2	19	Homo sapiens NLR family, pyrin domain containing 2 (NLRP2), mRNA.	NALP2; CLR19.9; PYPAF2; PAN1; FLJ20510; NBS1	NM_017852.1
ILMN_1664910	RPSA	271.41	2	25.515	0	0	197.908	2	11.5047	0	-12.0501	0.729184	ILMN_20469	RPSA	3	Homo sapiens ribosomal protein SA (RPSA), transcript variant 2, mRNA.	LRP; LAMBR; LAMR1; 67LR; p40; 37LRP	NM_001012321.1
ILMN_1664912	IL11RA	114.678	2	23.7502	0.00301205	0	127.477	2	5.73008	0.00150602	0.000291313	1.1116	ILMN_3536	IL11RA	9	Homo sapiens interleukin 11 receptor, alpha (IL11RA), transcript variant 1, mRNA.	MGC2146	NM_004512.3
ILMN_1664919	KCNK9	5.53324	2	5.96814	0.143072	0	4.61465	2	6.89816	0.158133	-0.000291313	0.833986	ILMN_11531	KCNK9	8	Homo sapiens potassium channel, subfamily K, member 9 (KCNK9), mRNA.	KT3.2; K2p9.1; MGC138270; MGC138268; TASK-3; TASK3	NM_016601.2
ILMN_1664920	C19orf12	339.285	2	22.3017	0	0	350.998	2	72.6353	0	0.000291313	1.03452	ILMN_11811	C19ORF12	19	Homo sapiens chromosome 19 open reading frame 12 (C19orf12), transcript variant 1, mRNA.	DKFZP762D096; MGC10922	NM_001031726.2
ILMN_1664921	PPP6C	1870.9	2	59.1202	0	0	2114.84	2	47.1468	0	2.12335	1.13039	ILMN_11470	PPP6C	9	Homo sapiens protein phosphatase 6, catalytic subunit (PPP6C), mRNA.		NM_002721.3
ILMN_1664922	FLNB	3115.09	2	385.397	0	0	4148.25	2	198.716	0	17.7873	1.33166	ILMN_21371	FLNB	3	Homo sapiens filamin B, beta (actin binding protein 278) (FLNB), mRNA.	FLN1L; filamin B; FH1; DKFZp686A1668; AOI; ABP-278; SCT; TAP; TABP	NM_001457.1
ILMN_1664928	ZNF599	3.58177	2	7.50331	0.192771	0	-2.19959	2	0.0850699	0.448795	-0.000291313	-0.614108	ILMN_11589	ZNF599	19	Homo sapiens zinc finger protein 599 (ZNF599), mRNA.		NM_001007248.2
ILMN_1664931	GTF2E2	4389.84	2	216.84	0	0	4054.59	2	137.673	0	-0.000291313	0.923631	ILMN_4316	GTF2E2	8	Homo sapiens general transcription factor IIE, polypeptide 2, beta 34kDa (GTF2E2), mRNA.	TFIIE-B; FE; TF2E2	NM_002095.4
ILMN_1664946	ZDHHC16	1.59261	2	5.08977	0.260542	0	7.0174	2	8.05471	0.121988	0.000291313	4.40621	ILMN_27357	ZDHHC16	10	Homo sapiens zinc finger, DHHC-type containing 16 (ZDHHC16), transcript variant 5, mRNA.	APH2; MGC2993	NM_198046.1
ILMN_1664956	SSU72	6488.97	2	139.827	0	0	6089.61	2	45.4517	0	-0.000291313	0.938456	ILMN_29116	SSU72	1	Homo sapiens SSU72 RNA polymerase II CTD phosphatase homolog (S. cerevisiae) (SSU72), mRNA.	PNAS-120; HSPC182; FLJ13048	NM_014188.2
ILMN_1664960	KIAA0284	74.4415	2	0.497132	0.00451807	0	95.2828	2	13.6624	0.00451807	0.72524	1.27997	ILMN_19362	KIAA0284	14	Homo sapiens KIAA0284 (KIAA0284), transcript variant 2, mRNA.	FAM68C; MGC131679	NM_015005.1
ILMN_1664994	MINPP1	568.843	2	37.3986	0	0	637.187	2	93.2449	0	0.000291313	1.12015	ILMN_29353	MINPP1	10	Homo sapiens multiple inositol polyphosphate histidine phosphatase, 1 (MINPP1), mRNA.	MIPP; HIPER1; MINPP2; DKFZp564L2016	NM_004897.2
ILMN_1665004	CASC3	471.199	2	95.3871	0	0	513.149	2	13.0265	0	0.000291313	1.08903	ILMN_28416	CASC3	17	Homo sapiens cancer susceptibility candidate 3 (CASC3), mRNA.	BTZ; MLN51	NM_007359.3
ILMN_1665011	LHX3	-4.31847	2	1.72067	0.637048	0	-4.1963	2	2.68415	0.643072	0.000291313	0.971709	ILMN_6619	LHX3	9	Homo sapiens LIM homeobox 3 (LHX3), transcript variant 2, mRNA.	M2-LHX3; DKFZp762A2013	NM_014564.2
ILMN_1665033	NPR3	3.93415	2	3.731	0.183735	0	1.7369	2	1.74654	0.243976	-0.000291313	0.441492	ILMN_21860	NPR3	5	Homo sapiens natriuretic peptide receptor C/guanylate cyclase C (atrionatriuretic peptide receptor C) (NPR3), mRNA.	NPRC; ANPRC	NM_000908.2
ILMN_1665035	KRT14	-7.1575	2	3.45143	0.855422	0	-5.09107	2	0.714483	0.707831	0.000291313	0.711292	ILMN_9209	KRT14	17	Homo sapiens keratin 14 (epidermolysis bullosa simplex, Dowling-Meara, Koebner) (KRT14), mRNA.	K14; NFJ; CK14; EBS3; EBS4	NM_000526.3
ILMN_1665040	RBMS3	-3.42949	2	3.54617	0.572289	0	-1.58267	2	1.46717	0.406627	0.000291313	0.461487	ILMN_16189	RBMS3	3	Homo sapiens RNA binding motif, single stranded interacting protein (RBMS3), transcript variant 1, mRNA.		NM_001003793.1
ILMN_1665049	SPG11	780.056	2	72.4919	0	0	859.375	2	10.8298	0	0.390788	1.10168	ILMN_6443	SPG11	15	Homo sapiens spastic paraplegia 11 (autosomal recessive) (SPG11), mRNA.	KIAA1840; DKFZp762B1512; FLJ21439	NM_025137.3
ILMN_1665058	TCHP	61.3992	2	13.6462	0.00903614	0	57.9641	2	8.44023	0.00903614	-0.000291313	0.944052	ILMN_2569	TCHP	12	Homo sapiens trichoplein, keratin filament binding (TCHP), mRNA.	MGC10854	NM_032300.2
ILMN_1665065	SERINC3	138.047	2	10.9097	0	0	120.902	2	10.9571	0.00301205	-0.000291313	0.875805	ILMN_10116	SERINC3	20	Homo sapiens serine incorporator 3 (SERINC3), transcript variant 2, mRNA.	TMS-1; TDE; SBBI99; DIFF33; TDE1; AIGP1	NM_198941.1
ILMN_1665066	C4orf14	1361.4	2	1.46097	0	0	1443.25	2	10.5204	0	0.000291313	1.06012	ILMN_7555	C4ORF14	4	Homo sapiens chromosome 4 open reading frame 14 (C4orf14), mRNA.	mAtNOS1; hAtNOS1; MGC3232	NM_032313.2
ILMN_1665095	NELF	904.218	2	2.41901	0	0	714.822	2	67.9726	0	-7.44561	0.790542	ILMN_28709	NELF	9	Homo sapiens nasal embryonic LHRH factor (NELF), mRNA.	RP11-48C7.1; MGC125369	NM_015537.3
ILMN_1665100	PTGS1	8.64964	2	0.218167	0.105422	0	17.5863	2	0.476362	0.0391566	0.000291313	2.03318	ILMN_24170	PTGS1	9	Homo sapiens prostaglandin-endoperoxide synthase 1 (prostaglandin G/H synthase and cyclooxygenase) (PTGS1), transcript variant 1, mRNA.	PCOX1; PGHS1; PGHS-1; PGG/HS; PHS1; COX1; PTGHS; COX3	NM_000962.2
ILMN_1665107	ITGB1BP1	469.12	2	3.18619	0	0	526.373	2	76.709	0	0.000291313	1.12204	ILMN_13169	ITGB1BP1	2	Homo sapiens integrin beta 1 binding protein 1 (ITGB1BP1), transcript variant 2, mRNA.	ICAP1B; ICAP-1alpha; ICAP1A; ICAP1; ICAP-1B; DKFZp686K08158; ICAP-1A	NM_022334.3
ILMN_1665117	C6orf89	84.4131	2	4.2714	0.00451807	0	125.301	2	15.8995	0.00150602	7.04712	1.48438	ILMN_6232	C6ORF89	6	Homo sapiens chromosome 6 open reading frame 89 (C6orf89), mRNA.	FLJ25357	NM_152734.2
ILMN_1665132	CD36	-5.84259	2	6.03144	0.781627	0	-3.68453	2	5.33376	0.587349	0.000291313	0.630634	ILMN_21797	CD36	7	Homo sapiens CD36 molecule (thrombospondin receptor) (CD36), transcript variant 2, mRNA.	GPIV; FAT; GP3B; CHDS7; SCARB3; PASIV; GP4	NM_001001547.1
ILMN_1665135	RBBP6	96.9133	2	17.8784	0.00301205	0	63.8045	2	10.3879	0.00903614	-3.53945	0.658366	ILMN_19179	RBBP6	16	Homo sapiens retinoblastoma binding protein 6 (RBBP6), transcript variant 3, mRNA.	RBQ-1; DKFZp761B2423; P2P-R; DKFZp686P0638; MY038	NM_032626.5
ILMN_1665136	HERC2P4	4.08261	2	1.64054	0.182229	0	-0.029487	2	7.80325	0.322289	-0.000291313	-0.00722258	ILMN_137553	HERC2P4	16	Homo sapiens hect domain and RLD 2 pseudogene 4 (HERC2P4), non-coding RNA.	D16F37S5	NR_002827.1
ILMN_1665152	FCRL2	-6.75526	2	3.76719	0.838855	0	-6.38979	2	3.05727	0.805723	0.000291313	0.945899	ILMN_2802	FCRL2	1	Homo sapiens Fc receptor-like 2 (FCRL2), transcript variant 2, mRNA.	SPAP1B; IFGP4; FCRH2; SPAP1A; SPAP1C; SPAP1; IRTA4	NM_030764.2
ILMN_1665167	RORA	-6.51381	2	4.17399	0.811747	0	-6.69869	2	4.69208	0.816265	-0.000291313	1.02838	ILMN_16126	RORA	15	Homo sapiens RAR-related orphan receptor A (RORA), transcript variant 2, mRNA.	NR1F1; MGC119326; ROR2; RZRA; ROR1; MGC119329; ROR3	NM_134260.1
ILMN_1665180	OPN5	-3.2538	2	0.325576	0.555723	0	-0.0370804	2	0.390968	0.322289	0.000291313	0.011396	ILMN_24306	OPN5	6	Homo sapiens opsin 5 (OPN5), transcript variant 2, mRNA.	PGR12; TMEM13; GPR136	NM_001030051.1
ILMN_1665203	SUMO4	0.376604	2	4.48675	0.305723	0	2.4544	2	1.81835	0.210843	0.000291313	6.51718	ILMN_17416	SUMO4	6	Homo sapiens SMT3 suppressor of mif two 3 homolog 4 (S. cerevisiae) (SUMO4), mRNA.	SMT3H4; dJ281H8.4; SUMO-4; IDDM5	NM_001002255.1
ILMN_1665205	ZNF260	360.283	2	8.02844	0	0	366.788	2	40.2094	0	0.000291313	1.01806	ILMN_6166	ZNF260	19	Homo sapiens zinc finger protein 260 (ZNF260), mRNA.	ozrf1; ZFP260	NM_001012756.1
ILMN_1665207	C10orf85	3.03822	2	2.19999	0.210843	0	6.31492	2	3.40622	0.13253	0.000291313	2.0785	ILMN_138412	C10ORF85	10	Homo sapiens chromosome 10 open reading frame 85 (C10orf85), mRNA.	FLJ37402; MGC131689	NM_001012711.2
ILMN_1665210	LOC441426	-8.57485	2	1.46416	0.930723	0	-8.78655	2	2.59554	0.930723	-0.000291313	1.02469	ILMN_17781	LOC441426	9	Homo sapiens hypothetical gene supported by AK126863 (LOC441426), mRNA.		NM_001013727.1
ILMN_1665212	EDC4	560.809	2	39.3242	0	0	519.289	2	11.5811	0	-0.000291313	0.925964	ILMN_21643	EDC4	16	Homo sapiens enhancer of mRNA decapping 4 (EDC4), mRNA.	HEDLS; RCD-8; Ge-1	NM_014329.3
ILMN_1665217	C3orf34	50.0565	2	12.4059	0.0105422	0	78.0757	2	1.04278	0.0060241	3.62374	1.55975	ILMN_21898	C3ORF34	3	Homo sapiens chromosome 3 open reading frame 34 (C3orf34), mRNA.	MGC14126	NM_032898.2
ILMN_1665219	LTBP4	467.445	2	29.4527	0	0	208.612	2	37.6833	0	-58.5915	0.446281	ILMN_21051	LTBP4	19	Homo sapiens latent transforming growth factor beta binding protein 4 (LTBP4), transcript variant 3, mRNA.	FLJ90018; LTBP-4L; FLJ46318; LTBP-4	NM_001042545.1
ILMN_1665235	CRTAP	597.694	2	92.0376	0	0	698.797	2	82.8575	0	0.505212	1.16915	ILMN_2952	CRTAP	3	Homo sapiens cartilage associated protein (CRTAP), mRNA.	CASP; OI7	NM_006371.3
ILMN_1665246	UMODL1	-1.96698	2	2.28809	0.465361	0	0.294193	2	2.31293	0.308735	0.000291313	-0.149566	ILMN_2144	UMODL1	21	Homo sapiens uromodulin-like 1 (UMODL1), transcript variant 2, mRNA.		NM_173568.3
ILMN_1665257	RIMS2	4.48544	2	0.0326434	0.174699	0	1.60732	2	0.538622	0.246988	-0.000291313	0.358341	ILMN_29921	RIMS2	8	Homo sapiens regulating synaptic membrane exocytosis 2 (RIMS2), transcript variant 2, mRNA.	RAB3IP3; DKFZp781A0653; RIM2; KIAA0751; OBOE	NM_014677.3
ILMN_1665260	FLJ25996	-2.73484	2	2.61855	0.513554	0	-7.70113	2	2.74801	0.887048	-0.000291313	2.81593	ILMN_12671	FLJ25996	3	Homo sapiens FLJ25996 protein (FLJ25996), mRNA.		NM_001001699.1
ILMN_1665280	SPCS1	6986.98	2	43.6195	0	0	6894.84	2	234.491	0	-0.000291313	0.986813	ILMN_25938	SPCS1	3	Homo sapiens signal peptidase complex subunit 1 homolog (S. cerevisiae) (SPCS1), mRNA.	YJR010C-A; HSPC033; SPC12; SPC1	NM_014041.2
ILMN_1665302	WDR38	1.15609	2	5.5061	0.277108	0	5.07911	2	4.80428	0.153614	0.000291313	4.39334	ILMN_44617	WDR38	9	Homo sapiens WD repeat domain 38 (WDR38), mRNA.		NM_001045476.1
ILMN_1665304	FOXN3	0.406497	2	2.37381	0.310241	0	-7.22579	2	0.830842	0.85994	-0.000291313	-17.7758	ILMN_139248	FOXN3	14	Homo sapiens forkhead box N3 (FOXN3), transcript variant 1, mRNA.	CHES1; C14orf116; PRO1635	NM_001085471.1
ILMN_1665307	AMPD3	-2.47113	2	1.58053	0.496988	0	1.70648	2	0.965307	0.245482	0.000291313	-0.690566	ILMN_13634	AMPD3	11	Homo sapiens adenosine monophosphate deaminase (isoform E) (AMPD3), transcript variant 2, mRNA.		NM_001025389.1
ILMN_1665311	STH	18.9963	2	4.44276	0.0331325	0	32.8748	2	3.99709	0.0210843	0.0489662	1.73059	ILMN_1785	STH	17	Homo sapiens saitohin (STH), mRNA.	MGC163193; MGC163191	NM_001007532.1
ILMN_1665319	NRTN	95.4902	2	15.9851	0.00301205	0	38.3853	2	2.39378	0.0180723	-18.7827	0.401981	ILMN_25657	NRTN	19	Homo sapiens neurturin (NRTN), mRNA.	NTN	NM_004558.2
ILMN_1665331	AMT	20.8211	2	6.21401	0.0301205	0	38.2982	2	19.0495	0.0180723	0.000291313	1.83939	ILMN_11202	AMT	3	Homo sapiens aminomethyltransferase (AMT), mRNA.	NKH; GCE; GCST	NM_000481.2
ILMN_1665335	DIABLO	79.9838	2	7.02693	0.00451807	0	113.959	2	8.88885	0.00301205	6.38214	1.42478	ILMN_19433	DIABLO	12	Homo sapiens diablo homolog (Drosophila) (DIABLO), nuclear gene encoding mitochondrial protein, transcript variant 2, mRNA.	SMAC; FLJ10537; DIABLO-S; SMAC3; FLJ25049	NM_138930.2
ILMN_1665357	EPS15	145.424	2	3.5106	0	0	178.977	2	21.5089	0	1.94874	1.23073	ILMN_8810	EPS15	1	Homo sapiens epidermal growth factor receptor pathway substrate 15 (EPS15), mRNA.	AF1P; MLLT5; AF-1P	NM_001981.2
ILMN_1665372	FXYD3	126.563	2	16.3453	0.00150602	0	306.749	2	8.30809	0	128.605	2.42369	ILMN_28639	FXYD3	19	Homo sapiens FXYD domain containing ion transport regulator 3 (FXYD3), transcript variant 2, mRNA.	MGC111076; MAT-8; MAT8; PLML	NM_021910.1
ILMN_1665374	COL9A1	6.9672	2	0.0716083	0.123494	0	9.29801	2	0.655685	0.0918675	0.000291313	1.33454	ILMN_16359	COL9A1	6	Homo sapiens collagen, type IX, alpha 1 (COL9A1), transcript variant 2, mRNA.	DJ149L1.1.2; FLJ40263; MED	NM_078485.2
ILMN_1665384	SH3BP5L	264.552	2	18.3296	0	0	272.542	2	14.1314	0	0.000291313	1.0302	ILMN_3697	SH3BP5L	1	Homo sapiens SH3-binding domain protein 5-like (SH3BP5L), mRNA.	FLJ33845; KIAA1720	NM_030645.1
ILMN_1665397	ZNF445	-0.297927	2	6.28699	0.355422	0	-3.62859	2	2.49777	0.572289	-0.000291313	12.1795	ILMN_28092	ZNF445	3	Homo sapiens zinc finger protein 445 (ZNF445), mRNA.	ZNF168; MGC126535; ZKSCAN15	NM_181489.5
ILMN_1665423	ZFP91	3322.57	2	227.738	0	0	3329.04	2	96.2847	0	0.000291313	1.00195	ILMN_7525	ZFP91	11	Homo sapiens zinc finger protein 91 homolog (mouse) (ZFP91), mRNA.	PZF; FKSG11; ZNF757	NM_053023.3
ILMN_1665425	RPRM	-6.96626	2	1.35073	0.846386	0	-5.6589	2	1.17298	0.745482	0.000291313	0.812329	ILMN_26680	RPRM	2	Homo sapiens reprimo, TP53 dependent G2 arrest mediator candidate (RPRM), mRNA.	FLJ90327; REPRIMO	NM_019845.2
ILMN_1665428	GSDMD	507.846	2	39.3794	0	0	425.649	2	28.9224	0	-4.01604	0.838146	ILMN_138138	GSDMD	8	Homo sapiens gasdermin D (GSDMD), mRNA.	FLJ12150; FKSG10; DF5L	NM_024736.5
ILMN_1665435	GPER	28.2696	2	11.0132	0.0195783	0	33.3733	2	6.13572	0.0210843	0.000291313	1.18054	ILMN_20914	GPER	7	Homo sapiens G protein-coupled estrogen receptor 1 (GPER), transcript variant 3, mRNA.	LyGPR; DRY12; GPCR-Br; LERGU; MGC99678; GPR30; CEPR; CMKRL2; FEG-1; LERGU2	NM_001039966.1
ILMN_1665437	CYP2E1	0.292257	2	1.11031	0.316265	0	-3.14851	2	0.128814	0.52259	-0.000291313	-10.7731	ILMN_27893	CYP2E1	10	Homo sapiens cytochrome P450, family 2, subfamily E, polypeptide 1 (CYP2E1), mRNA.	P450C2E; CYP2E; P450-J; CPE1	NM_000773.3
ILMN_1665442	NOL6	65.1262	2	2.66923	0.0060241	0	54.0472	2	8.48094	0.0120482	-0.000291313	0.829885	ILMN_5016	NOL6	9	Homo sapiens nucleolar protein family 6 (RNA-associated) (NOL6), transcript variant alpha, mRNA.	MGC20838; NRAP; MGC14921; bA311H10.1; MGC14896; UTP22; FLJ21959	NM_022917.4
ILMN_1665449	ROBO4	-0.820048	2	2.19666	0.391566	0	-0.914886	2	3.3151	0.368976	-0.000291313	1.11565	ILMN_17254	ROBO4	11	Homo sapiens roundabout homolog 4, magic roundabout (Drosophila) (ROBO4), mRNA.	FLJ20798; MGC133353; MRB; MGC133352	NM_019055.4
ILMN_1665455	DCUN1D3	236.355	2	6.86047	0	0	292.831	2	2.4672	0	6.41571	1.23895	ILMN_6604	DCUN1D3	16	Homo sapiens DCN1, defective in cullin neddylation 1, domain containing 3 (S. cerevisiae) (DCUN1D3), mRNA.	MGC48972; FLJ41725; DKFZp686O0290; 44M2.4	NM_173475.1
ILMN_1665457	CLEC4C	5.08479	2	1.19791	0.149096	0	1.19105	2	5.81473	0.262048	-0.000291313	0.234238	ILMN_28450	CLEC4C	12	Homo sapiens C-type lectin domain family 4, member C (CLEC4C), transcript variant 1, mRNA.	CLECSF7; BDCA2; CD303; DLEC; CLECSF11; PRO34150; MGC125793; HECL; MGC125792; MGC125789; MGC125791	NM_130441.2
ILMN_1665471	C2orf54	-4.93951	2	1.11796	0.701807	0	-2.6191	2	0.528086	0.47741	0.000291313	0.530234	ILMN_27107	C2ORF54	2	Homo sapiens chromosome 2 open reading frame 54 (C2orf54), transcript variant 1, mRNA.	MGC150431; MGC150432; FLJ22671	NM_001085437.1
ILMN_1665483	KIAA0020	824.44	2	2.01481	0	0	757.841	2	29.1424	0	-0.000291313	0.919219	ILMN_19508	KIAA0020	9	Homo sapiens KIAA0020 (KIAA0020), mRNA.	RP11-526D20.2; PUF6; MGC8749; HLA-HA8; XTP5; PEN	NM_014878.4
ILMN_1665492	SORCS1	2.25893	2	4.05762	0.237952	0	3.37405	2	2.95846	0.185241	0.000291313	1.49365	ILMN_4541	SORCS1	10	Homo sapiens sortilin-related VPS10 domain containing receptor 1 (SORCS1), transcript variant 1, mRNA.	FLJ41758; FLJ43475; FLJ44957	NM_052918.3
ILMN_1665508	C10orf12	54.864	2	0.462336	0.0105422	0	49.2183	2	6.71126	0.0150602	-0.000291313	0.897097	ILMN_15899	C10ORF12	10	Homo sapiens chromosome 10 open reading frame 12 (C10orf12), mRNA.	FLJ13022; DKFZP564P1916	NM_015652.2
ILMN_1665510	ERRFI1	3820.4	2	62.7102	0	0	8276.52	2	192.555	0	350.901	2.1664	ILMN_4328	ERRFI1	1	Homo sapiens ERBB receptor feedback inhibitor 1 (ERRFI1), mRNA.	GENE-33; MIG-6; RALT; MIG6	NM_018948.2
ILMN_1665515	MGC4677	-3.9796	2	1.88794	0.603916	0	4.67635	2	4.83976	0.158133	0.000291313	-1.17508	ILMN_137135	MGC4677	2	Homo sapiens hypothetical protein MGC4677 (MGC4677), mRNA.	MGC17532; MGC88182	NM_052871.3
ILMN_1665521	STAMBP	-3.9737	2	1.13835	0.605422	0	-1.13862	2	3.79761	0.379518	0.000291313	0.286538	ILMN_24611	STAMBP	2	Homo sapiens STAM binding protein (STAMBP), transcript variant 3, mRNA.	MGC126518; AMSH; MGC126516	NM_213622.1
ILMN_1665526	TCEA2	-6.22517	2	1.10827	0.801205	0	-8.33413	2	2.01073	0.920181	-0.000291313	1.33878	ILMN_10248	TCEA2	20	Homo sapiens transcription elongation factor A (SII), 2 (TCEA2), transcript variant 2, mRNA.	TFIIS	NM_198723.1
ILMN_1665538	SKP2	2443.96	2	76.0645	0	0	1220.06	2	52.1675	0	-80.2489	0.499214	ILMN_13630	SKP2	5	Homo sapiens S-phase kinase-associated protein 2 (p45) (SKP2), transcript variant 2, mRNA.	MGC1366; FBXL1; FBL1; FLB1	NM_032637.2
ILMN_1665547	CADPS	10.1466	2	7.78985	0.0737952	0	7.10187	2	0.501993	0.121988	-0.000291313	0.699928	ILMN_18905	CADPS	3	Homo sapiens Ca2+-dependent secretion activator (CADPS), transcript variant 1, mRNA.	KIAA1121; CAPS; CAPS1	NM_003716.2
ILMN_1665554	BRF2	479.095	2	54.1446	0	0	1025.68	2	3.05378	0	350.901	2.14087	ILMN_2966	BRF2	8	Homo sapiens BRF2, subunit of RNA polymerase III transcription initiation factor, BRF1-like (BRF2), mRNA.	TFIIIB50; FLJ11052; BRFU	NM_018310.2
ILMN_1665557	USP15	160.652	2	11.2789	0	0	230.36	2	14.1428	0	17.8061	1.43391	ILMN_12451	USP15	12	Homo sapiens ubiquitin specific peptidase 15 (USP15), mRNA.	MGC131982; MGC149838; KIAA0529; UNPH4; MGC74854	NM_006313.1
ILMN_1665559	CDK2	1815.75	2	47.175	0	0	967.6	2	60.9318	0	-67.356	0.532894	ILMN_12332	CDK2	12	Homo sapiens cyclin-dependent kinase 2 (CDK2), transcript variant 1, mRNA.	p33(CDK2)	NM_001798.2
ILMN_1665562	PLIN	-2.55447	2	7.20585	0.49247	0	2.31411	2	1.85775	0.215361	0.000291313	-0.905907	ILMN_27731	PLIN	15	Homo sapiens perilipin (PLIN), mRNA.	PERI	NM_002666.3
ILMN_1665622	WDR5B	42.0837	2	7.28685	0.0135542	0	78.1588	2	0.0940049	0.0060241	9.56869	1.85722	ILMN_26641	WDR5B	3	Homo sapiens WD repeat domain 5B (WDR5B), mRNA.	MGC49879; FLJ11287	NM_019069.3
ILMN_1665647	CD180	-0.948943	2	8.66163	0.384036	0	3.74947	2	1.12965	0.170181	0.000291313	-3.9512	ILMN_6958	CD180	5	Homo sapiens CD180 molecule (CD180), mRNA.	LY64; Ly78; MGC126234; MGC126233; RP105	NM_005582.1
ILMN_1665657	LCA5L	2.36096	2	4.00178	0.231928	0	3.72866	2	0.16541	0.171687	0.000291313	1.5793	ILMN_10919	LCA5L	21	Homo sapiens Leber congenital amaurosis 5-like (LCA5L), mRNA.	C21orf13; MGC33295	NM_152505.3
ILMN_1665660	C11orf17	7.67302	2	7.75956	0.111446	0	6.58708	2	1.30912	0.125	-0.000291313	0.858474	ILMN_904	C11ORF17	11	Homo sapiens chromosome 11 open reading frame 17 (C11orf17), transcript variant 1, mRNA.	BCA3; AKIP1	NM_182901.2
ILMN_1665671	EPO	-0.823018	2	4.99416	0.381024	0	-6.61695	2	1.53614	0.808735	-0.000291313	8.03985	ILMN_6125	EPO	7	Homo sapiens erythropoietin (EPO), mRNA.	MGC138142; EP	NM_000799.2
ILMN_1665679	PEX10	-0.344518	2	0.825593	0.349398	0	7.19344	2	0.228612	0.120482	0.000291313	-20.8797	ILMN_24456	PEX10	1	Homo sapiens peroxisomal biogenesis factor 10 (PEX10), transcript variant 1, mRNA.	RNF69; MGC1998; NALD	NM_153818.1
ILMN_1665682	IL15RA	17.4976	2	14.1862	0.0406627	0	31.0065	2	3.31883	0.0225904	0.000291313	1.77204	ILMN_4552	IL15RA	10	Homo sapiens interleukin 15 receptor, alpha (IL15RA), transcript variant 1, mRNA.	MGC104179	NM_002189.2
ILMN_1665686	FAM38B	4.96989	2	2.92718	0.161145	0	6.56355	2	8.86422	0.131024	0.000291313	1.32066	ILMN_10543	FAM38B	18	Homo sapiens family with sequence similarity 38, member B (FAM38B), mRNA.	HsT748; FLJ23144; FLJ23403	NM_022068.1
ILMN_1665691	ACTN3	-2.61194	2	1.94345	0.503012	0	-7.02507	2	4.09531	0.838855	-0.000291313	2.6896	ILMN_15544	ACTN3	11	Homo sapiens actinin, alpha 3 (ACTN3), mRNA.	MGC117002; MGC117005	NM_001104.1
ILMN_1665696	EFNA4	498.092	2	49.8043	0	0	438.398	2	29.9931	0	-1.26554	0.880155	ILMN_18185	EFNA4	1	Homo sapiens ephrin-A4 (EFNA4), transcript variant 1, mRNA.	MGC125826; EPLG4; EFL4; LERK4	NM_005227.2
ILMN_1665714	C4orf22	-2.80534	2	0.964334	0.524096	0	-7.24133	2	1.27933	0.85994	-0.000291313	2.58126	ILMN_22918	C4ORF22	4	Homo sapiens chromosome 4 open reading frame 22 (C4orf22), mRNA.	MGC35043	NM_152770.1
ILMN_1665717	EIF2S3	2984.71	2	192.382	0	0	3262.93	2	112.731	0	0.199314	1.09321	ILMN_138427	EIF2S3	X	Homo sapiens eukaryotic translation initiation factor 2, subunit 3 gamma, 52kDa (EIF2S3), mRNA.	EIF2G; EIF2gamma; EIF2	NM_001415.3
ILMN_1665730	ABCB10	688.649	2	45.2736	0	0	598.416	2	42.5611	0	-2.05445	0.868971	ILMN_4642	ABCB10	1	Homo sapiens ATP-binding cassette, sub-family B (MDR/TAP), member 10 (ABCB10), nuclear gene encoding mitochondrial protein, mRNA.	EST20237; M-ABC2; MTABC2	NM_012089.1
ILMN_1665737	UFD1L	112.356	2	3.7559	0.00301205	0	187.649	2	13.4136	0	29.412	1.67012	ILMN_138971	UFD1L	22	Homo sapiens ubiquitin fusion degradation 1 like (yeast) (UFD1L), transcript variant 2, mRNA.	UFD1	NM_001035247.1
ILMN_1665738	FLI1	-3.78983	2	4.22649	0.59488	0	-0.362393	2	3.80926	0.335843	0.000291313	0.0956226	ILMN_22734	FLI1	11	Homo sapiens Friend leukemia virus integration 1 (FLI1), mRNA.	SIC-1; EWSR2	NM_002017.2
ILMN_1665740	LOC149950	16.0757	2	5.06227	0.0466867	0	13.1373	2	4.79777	0.0557229	-0.000291313	0.817211	ILMN_26419	LOC149950	20	Homo sapiens hypothetical LOC149950 (LOC149950), mRNA.	MGC163334; MGC163336	NM_001010976.1
ILMN_1665748	DCC	-1.2157	2	3.29398	0.412651	0	-1.93339	2	2.80323	0.433735	-0.000291313	1.59036	ILMN_16930	DCC	18	Homo sapiens deleted in colorectal carcinoma (DCC), mRNA.	CRCR1; CRC18	NM_005215.2
ILMN_1665761	BCL11B	100.62	2	9.36225	0.00301205	0	64.8069	2	10.0818	0.00903614	-6.24237	0.644077	ILMN_1277	BCL11B	14	Homo sapiens B-cell CLL/lymphoma 11B (zinc finger protein) (BCL11B), transcript variant 1, mRNA.	hRIT1-alpha; RIT1; CTIP2; CTIP-2	NM_138576.2
ILMN_1665775	MOSC2	239.476	2	19.9265	0	0	258.908	2	2.68781	0	0.000291313	1.08114	ILMN_6911	MOSC2	1	Homo sapiens MOCO sulphurase C-terminal domain containing 2 (MOSC2), mRNA.	FLJ20605; RP11-270A6.1	NM_017898.3
ILMN_1665792	ITGA2	472.272	2	59.5307	0	0	1175.71	2	73.8539	0	350.901	2.48947	ILMN_12662	ITGA2	5	Homo sapiens integrin, alpha 2 (CD49B, alpha 2 subunit of VLA-2 receptor) (ITGA2), mRNA.	CD49B; VLAA2; VLA-2; BR; GPIa	NM_002203.3
ILMN_1665797	CSE1L	3630.72	2	44.8545	0	0	2595.57	2	6.92626	0	-22.2643	0.714889	ILMN_6023	CSE1L	20	Homo sapiens CSE1 chromosome segregation 1-like (yeast) (CSE1L), mRNA.	XPO2; CSE1; CAS; MGC117283; MGC130036; MGC130037	NM_001316.2
ILMN_1665806	OR13C2	-4.59194	2	0.409485	0.673193	0	1.48633	2	3.00045	0.25	0.000291313	-0.323681	ILMN_503	OR13C2	9	Homo sapiens olfactory receptor, family 13, subfamily C, member 2 (OR13C2), mRNA.	OR37K	NM_001004481.1
ILMN_1665824	C6orf218	2.45505	2	0.812247	0.228916	0	-0.735765	2	2.12364	0.356928	-0.000291313	-0.299694	ILMN_27124	C6ORF218	6	Homo sapiens chromosome 6 open reading frame 218 (C6orf218), mRNA.	MGC40222	NM_152738.1
ILMN_1665831	CLPTM1	1021.89	2	104.975	0	0	890.282	2	20.8698	0	-2.35057	0.871212	ILMN_22488	CLPTM1	19	Homo sapiens cleft lip and palate associated transmembrane protein 1 (CLPTM1), mRNA.		NM_001294.1
ILMN_1665832	ID1	48.5728	2	2.24419	0.0105422	0	99.2245	2	15.2346	0.00301205	14.0303	2.0428	ILMN_28002	ID1	20	Homo sapiens inhibitor of DNA binding 1, dominant negative helix-loop-helix protein (ID1), transcript variant 2, mRNA.	ID	NM_181353.1
ILMN_1665838	SLC25A24	-2.48054	2	1.9975	0.493976	0	-3.04151	2	2.97443	0.509036	-0.000291313	1.22615	ILMN_22916	SLC25A24	1	Homo sapiens solute carrier family 25 (mitochondrial carrier; phosphate carrier), member 24 (SLC25A24), nuclear gene encoding mitochondrial protein, transcript variant 2, mRNA.	DKFZp586G0123; APC1; SCAMC-1	NM_213651.1
ILMN_1665855	CFHR4	-6.28309	2	0.416669	0.804217	0	-3.20446	2	1.20215	0.524096	0.000291313	0.510014	ILMN_1994	CFHR4	1	Homo sapiens complement factor H-related 4 (CFHR4), mRNA.	RP4-608O15.2; CFHL4; FHR-4; FHR4	NM_006684.2
ILMN_1665856	CA10	-2.82403	2	5.30047	0.518072	0	-0.888373	2	5.42401	0.362952	0.000291313	0.314576	ILMN_26058	CA10	17	Homo sapiens carbonic anhydrase X (CA10), mRNA.	CARPX; HUCEP-15; CA-RPX	NM_020178.3
[truncated: 22,763 more rows]
